# Supplementary material
Source: PubMed Central journal article supplement (PMC4211291)

# Congested C-C Bonds by Pd-Catalyzed Enantioselective Allyl-Allyl Cross-Coupling, A Mechanism-Guided Solution

Michael J. Ardolino, and James P. Morken\*

*Department of Chemistry, Merkert Chemistry Center, Boston College, Chestnut Hill, MA 02467*

## Supporting Information

### Table of Contents

|                                                                                                            |      |
|------------------------------------------------------------------------------------------------------------|------|
| <b>General Information</b> .....                                                                           | S-2  |
| <b>Experimental Data</b> .....                                                                             | S-3  |
| Catalyst Preparation.....                                                                                  | S-3  |
| Preparation of Allylic Electrophiles.....                                                                  | S-4  |
| Characterization of Allylic Electrophiles.....                                                             | S-5  |
| Preparation of Substituted Allylboron Reagents.....                                                        | S-7  |
| Characterization of Substituted Allylboron Reagents.....                                                   | S-8  |
| Experimental Procedures for Allyl-Allyl Cross-Couplings.....                                               | S-13 |
| Characterization of Cross-Coupling Products and Stereochemical Analysis.....                               | S-14 |
| Representative Procedure for Calorimeter Experiments.....                                                  | S-37 |
| Explanation of Deuterium Labeling Study and Preparation and Characterization of Reagents and Products..... | S-38 |
| <b>Computational Detail</b> .....                                                                          | S-45 |
| <b>Spectral Data</b> .....                                                                                 | S-87 |

## General Information

<sup>1</sup>H NMR spectra were recorded on a Varian Unity Inova 500 (500 MHz) or Varian VNMRS 600 (600 MHz) spectrometer. Chemical shifts are reported in ppm with the solvent resonance as the internal standard (CDCl<sub>3</sub>: 7.26 ppm). Data are reported as follows: chemical shift, integration, multiplicity (s = singlet, d = doublet, t = triplet, q = quartet, p = pentet, br = broad, m = multiplet, app = apparent), and coupling constants (Hz). Coupling constants are reported to the nearest 0.5 Hz. <sup>13</sup>C NMR spectra were recorded on a Varian Gemini-500 (125 MHz) or Varian VNMRS 600 (125 MHz) spectrometer with complete proton decoupling. Chemical shifts are reported in ppm with the solvent resonance as the internal standard (CDCl<sub>3</sub>: 77.0 ppm). <sup>31</sup>P NMR spectra were recorded on a Varian Gemini-500 (202 MHz) spectrometer with complete proton decoupling. Chemical shifts are reported in ppm with phosphoric acid as the external standard (H<sub>3</sub>PO<sub>4</sub>: 0.0 ppm). Infrared (IR) spectra were recorded on a Bruker alpha spectrophotometer,  $\nu_{\text{max}}$  cm<sup>-1</sup>. Bands are characterized as broad (br), strong (s), medium (m), and weak (w). High resolution mass spectrometry (ESI) was performed at the Mass Spectrometry Facility, Boston College.

Liquid Chromatography was performed using forced flow (flash chromatography) on silica gel (SiO<sub>2</sub>, 230 × 450 Mesh) purchased from Silicycle. Thin Layer Chromatography was performed on 25 μm silica gel plates purchased from Silicycle. Visualization was performed using ultraviolet light (254 nm), potassium permanganate (KMnO<sub>4</sub>) in water, ceric ammonium molybdate (CAM) in water, or phosphomolybdic acid (PMA) in ethanol. Analytical chiral gas-liquid chromatography (GLC) was performed on a Hewlett-Packard 6890 Series chromatograph equipped with a split mode capillary injection system, a flame ionization detector, and a Supelco β-Dex 120 column, or a Supelco Asta ChiralDex B-DM with helium as the carrier gas. Analytical chiral supercritical fluid chromatography (SFC) was performed on a Thar SFC equipped with a Waters 2998 photodiode array detector and an analytical-2-prep column oven with isopropanol as the modifier. Optical rotations were measured on a Rudolph Analytical Research Autopol IV Polarimeter.

Reaction Calorimetry was carried out in a SuperCRC reaction calorimeter in a glass vial equipped with a teflon-lined septum-cap and magnetic stir bar. The calorimeter measures the heat released or consumed in a sample vial compared with that from a reference vial over the course of the reaction.

All reactions were conducted in oven- or flame-dried glassware under an inert atmosphere of nitrogen or argon. Tetrahydrofuran (THF), Toluene (PhMe), and dichloromethane (DCM) were purified using a Pure Solv MD-4 solvent purification system from Innovative Technology Inc. by passing through two activated alumina columns after being purged with argon. Triethylamine (TEA) was distilled from calcium hydride. The deionized water used in the coupling reactions was purged with a vigorous stream of N<sub>2</sub> for at least two hours prior to use. Tris(dibenzylideneacetone) dipalladium(0) [Pd<sub>2</sub>(dba)<sub>3</sub>], bis(1,5-cyclooctadiene)nickel(0)

[Ni(cod)<sub>2</sub>], Dichlorobis(benzonitrile)palladium(II) [PdCl<sub>2</sub>(NCPH)<sub>2</sub>], tricyclohexylphosphine (PCy<sub>3</sub>), 1,2-bis(diphenylphosphino)benzene (dpp-Benzene), (*R*)-(+)-2,2'-bis(di-2-furanylphosphino)-6,6'-dimethoxy-1,1'-biphenyl [(*R*)-MeO(furyl)BIPHEP], and (*S,S*)-(-)-2,3-bis(*t*-butylmethylphosphino)quinoxaline [(*S,S*)-QuinoxP\*], were purchased from Strem Chemicals, Inc. Pinacolborane (pinBH) was generously donated by BASF. Allylboronic acid pinacol ester (allyl Bpin) was generously donated by Frontier Scientific. bis(pinacolato) diboron [B<sub>2</sub>(pin)<sub>2</sub>] was generously donated by Allychem. All other reagents were purchased from either Fisher or Aldrich and used without further purification.

## Experimental Procedures

### Preparation PdCl<sub>2</sub>-Ligand Complexes.<sup>1</sup>

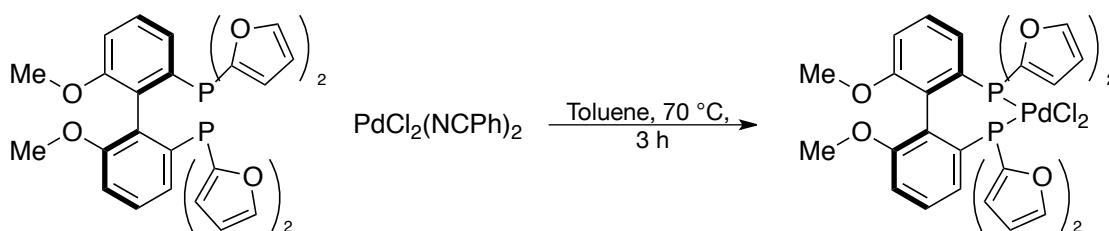

**Representative Procedure:** An oven-dried round-bottomed flask equipped with a magnetic stir bar was charged with bis(benzonitrile)palladium(II) chloride (83.9 mg, .219 mmol) and toluene (12.0 mL) in a dry-box under argon atmosphere to form a rust-brown solution. Also in the dry-box, an oven-dried 2 dram vial equipped with a magnetic stir bar was charged with (*R*)-(+)-2,2'-bis(di-2-furanylphosphino)-6,6'-dimethoxy-1,1'-biphenyl [(*R*)-Methoxy(furyl)BIPHEP] (120.0 mg, 0.221 mmol) and toluene (3.0 mL). Both vessels were sealed with septa, removed from the dry box, and heated to 70 °C with stirring under a positive pressure of dry nitrogen. The solution of ligand was added dropwise to the stirring solution of palladium complex over five minutes. The solution was stirred for three hours, over the course of which a bright yellow precipitate formed. The solution was slowly cooled to room temperature, and additional solids were crashed out of solution with the addition of pentane (30 mL). The solids were filtered away from the solution in a Buchner funnel with filter paper and washed with cold diethyl ether to yield a fine, dull yellow powder. This powder was dried for 12 hours under high-vacuum at 60 °C to yield a bright yellow powder (106 mg, 67% yield). The catalyst complex was effective without any further purification.

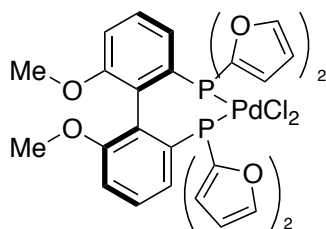

**[(*R*)-(+)-2,2'-bis(di-2-furanylphosphino)-6,6'-dimethoxy-1,1'-biphenyl]palladium(II) dichloride (4).** <sup>1</sup>H NMR (500 MHz, CDCl<sub>3</sub>): δ 7.80 (2H, s), 7.483 (2H, s), 7.22 (2H, dd, J = 3.0 Hz, 3.0 Hz), 7.16 (2H, ddd, J = 8.0 Hz, 8.0 Hz, 3.0 Hz), 6.93 (2H, d, J = 3.0 Hz), 6.85 (2H, dd, J = 12.5 Hz, 8.0 Hz), 6.76 (2H, d, J = 8.0 Hz), 6.45 (2H, ddd, J = 3.0 Hz, 1.5 Hz, 1.5 Hz), 6.24-6.43 (2H, m), 3.60 (6H, s); <sup>31</sup>P NMR (202 MHz, CDCl<sub>3</sub>): δ -11.56; IR (neat): 3109 (m), 3084 (m),

<sup>1</sup> Modified from: Sperrle, M.; Consiglio, G. *J. Am. Chem. Soc.* **1995**, *117*, 12130.

2937 (m), 2835 (w), 2228 (m), 1461 (s), 1267 (s), 1010 (s); A crystal structure of this catalyst complex has also been previously reported.<sup>2</sup>

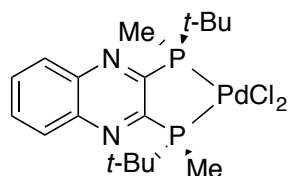

**[(*S,S*)-2,3-bis(*tert*-butylmethylphosphino)quinoxaline]palladium(II) dichloride (Compound SI-1).**

The title compound was prepared *via* the representative procedure using (*S,S*)-2,3-bis(*tert*-butylmethylphosphino)quinoxaline ((*S,S*)-QuinoxP\*) as the ligand with the following modifications: the reaction was run at 60 °C for three hours and the reaction was run on a 0.1 mmol scale. <sup>1</sup>H NMR (600 MHz, CDCl<sub>3</sub>): δ 8.31 (2H, dd, *J* = 6.5 Hz, 3.5 Hz), 8.04 (2H, dd, *J* = 6.5 Hz, 3.5 Hz), 2.26 (3H, s), 2.24 (3H, s), 1.26 (9H, s), 1.23 (9H, s); <sup>13</sup>C NMR (125 MHz, CDCl<sub>3</sub>): δ 133.3, 133.3, 130.2, 130.2, 27.9, 27.9, 27.9, 27.9, 27.9, 27.9 (unable to detect the carbons adjacent to phosphorous); <sup>31</sup>P NMR (202 MHz, CDCl<sub>3</sub>): δ 55.5; IR (neat): 2983 (w), 2961 (m), 2922 (w), 2900 (w), 2866 (w), 2357 (w), 2344 (w), 2222 (w), 1559 (w), 1542 (w), 1473 (m), 1459 (w), 1416 (w), 1397 (w), 1334 (w), 1192 (w), 1019 (w), 896 (m), 777 (m), 729 (m), 644 (w); HRMS-(ESI+) for C<sub>18</sub>H<sub>32</sub>Cl<sub>2</sub>N<sub>3</sub>P<sub>2</sub>Pd<sub>1</sub> [M+NH<sub>4</sub>]: calculated: 530.0488, found: 530.0486. The resulting solid was dried at 80 °C under high vacuum overnight to yield 33.3 mg (65% yield) of a pale yellow/tan solid.

**Preparation of *tert*-Butyl Carbonates.<sup>3</sup>**

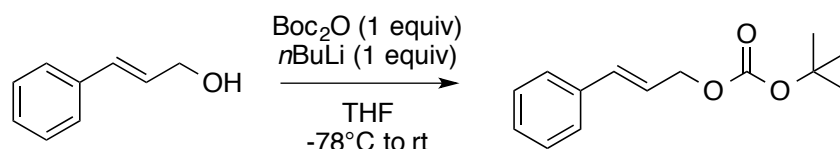

**Representative Procedure (Compound 1a):** A flame-dried round-bottomed flask equipped with a magnetic stir bar was charged with THF (30.0 mL) and cinnamyl alcohol (1.34 mg, 10.0 mmol) under a nitrogen atmosphere. The solution was cooled to -78 °C, and *n*-butyl lithium (10.0 mmol, 4.8 mL of a 2.1 M solution) was added dropwise over a period of 10 minutes, and the solution was stirred at -78 °C for 30 min. A separately prepared solution of di-*tert*-butyl dicarbonate (2.18 g, 10.0 mmol) dissolved in 5 mL of THF under a nitrogen atmosphere was added dropwise at -78 °C, and the solution was warmed to 0 °C for 2 hours followed by gradual warming to room temperature overnight. The reaction was re-cooled to 0 °C and quenched with 100 mL of a 3:2 mixture of diethyl ether and ice water, poured into a separatory funnel and extracted into diethyl ether (3 x 100 mL). The combined organics were dried over magnesium sulfate, filtered, and concentrated *in vacuo*. The crude reaction mixture was purified on silica gel (10:1 pentane:diethyl ether) to afford a clear, colorless oil (1.78 g, 76% yield) (compound **1a**). *R<sub>f</sub>*

<sup>2</sup> Brozek, L. A.; Ardolino, M. J.; Morcken, J. P. *J. Am. Chem. Soc.* **2011**, *133*, 16778.

<sup>3</sup> Adapted from: Trost, B. M.; Fraisse, P. L.; Ball, Z. T. *Angew. Chem. Int. Ed.* **2002**, *41*, 1059.

= 0.60 (10:1 pentane:diethyl ether, stain in  $\text{KMnO}_4$ ) Spectral data is in accordance with the literature.<sup>3</sup>

**Preparation of tert-butyl (2-phenylbut-3-en-2-yl) carbonate (Compound 2a).** From 2-phenylbut-3-en-2-ol, prepared from commercially available acetophenone as shown below, the representative procedure was followed with the following modifications: the reaction was run on a 3.0 mmol scale with 1.05 equiv *n*-butyl lithium and 1.5 equivalents of di-*tert*-butyl dicarbonate. The crude reaction mixture was purified on silica gel (10:1 pentane:diethyl ether) to afford a clear, colorless oil (714 mg, 96% yield).  $R_f = 0.67$  (10:1 pentane:diethyl ether, stain in  $\text{KMnO}_4$ ). The product was isolated as a 4:1 mixture of branched:linear isomers, spectral data is in accordance with the literature.<sup>4</sup>

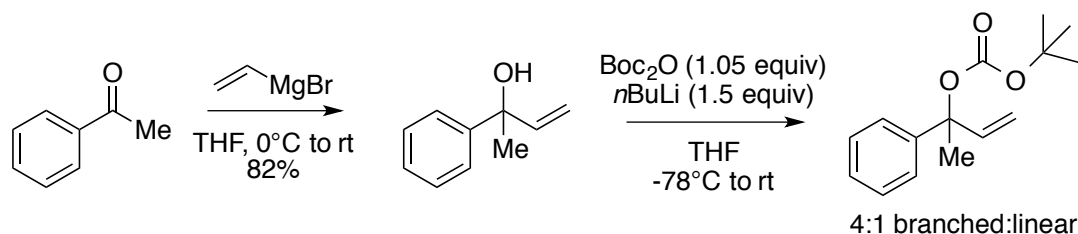

### Preparation of Substituted Allylic Chlorides.<sup>5</sup>

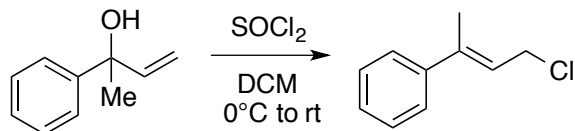

**Representative Procedure (Compound 2b):** An oven-dried round-bottomed flask equipped with a magnetic stir bar was charged with dichloromethane (40 mL) and 2-phenylbut-3-en-2-ol (1.33 g, 9.0 mmol) under a nitrogen atmosphere. The solution was cooled to 0 °C and thionyl chloride (2.4 mL, 36.0 mmol) was added dropwise. The solution was stirred at 0 °C for 2 h, then warmed to rt for 1 h. The reaction was quenched with ice water and extracted into dichloromethane (3 X 50 mL). The combined organics were dried over sodium sulfate, filtered, and concentrated *in vacuo*. The crude reaction mixture was purified by kugelrohr distillation (hi-vacuum, 140 °C) to afford a clear, colorless liquid (1.26 g, 85% yield) (compound **2b**). Spectral data is in accordance with the literature.<sup>6</sup>

<sup>4</sup> Zhang, P.; Le, H.; Kyne, R. E.; Morken, J. P. *J. Am. Chem. Soc.* **2011**, *133*, 9716.

<sup>5</sup> Adapted from: Gissot, A.; Wagner, A.; Mioskowski, C. *Tetrahedron* **2004**, *60*, 6807.

<sup>6</sup> Falciola, C. A.; Tissot-Croset, K.; Reyneri, H.; Alexakis, A. *Adv. Synth. Catal.* **2008**, *350*, 1090.

**Preparation of (E)-1-chloro-4-(3-chloroprop-1-en-1-yl)benzene (Compound SI-2).** From 1-(4-chlorophenyl)prop-2-en-1-ol, prepared from commercially available 4-chlorobenzaldehyde as shown below, the representative procedure was followed with the following modifications: the reaction was run on a 15.5 mmol scale with 10 equivalents of SOCl<sub>2</sub>. After extraction and concentration *in vacuo*, the crude oil was dissolved in pentane and pushed through a plug of neutral alumina and concentrated *in vacuo* once more. The resulting wet, orange crystals were then purified by kugelrohr distillation (hi-vacuum, 180 °C) to afford a white, fluffy solid (966 mg, 34% yield). Spectral data is in accordance with the literature.<sup>7</sup>

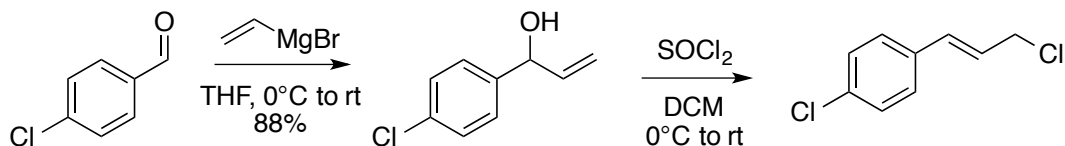

**Preparation of (E)-1-(3-chloroprop-1-en-1-yl)-4-methoxybenzene (Compound SI-3).** From 1-(4-methoxyphenyl)prop-2-en-1-ol, prepared from commercially available 4-methoxybenzaldehyde as shown below, the representative procedure was followed with the following modifications: the reaction was run on a 3.0 mmol scale with 10 equivalents of SOCl<sub>2</sub> to afford a off-white solid (483 mg, 87% yield). The crude product was used in the cross-coupling with no further purification. Spectral data is in accordance with the literature.<sup>8</sup>

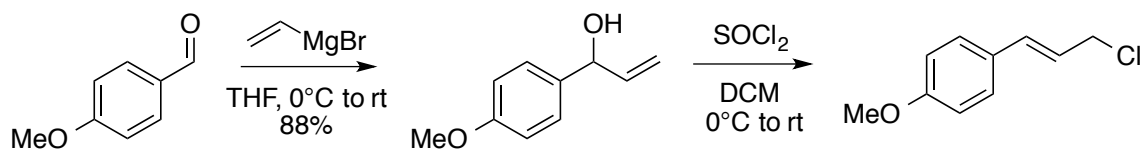

**Preparation of tert-butyl (E)-3-(3-chloroprop-1-en-1-yl)-1H-indole-1-carboxylate (Compound SI-4).** From tert-butyl 3-(1-hydroxyallyl)-1H-indole-1-carboxylate, prepared from commercially available 1H-indole-3-carbaldehyde as shown below, the representative procedure was followed with the following modifications: the reaction was run on a 2.0 mmol scale with only 1.6 equivalents of SOCl<sub>2</sub> (380 mg, 3.2 mmol) and the addition of triethylamine (0.42 mL, 3.0 mmol) to afford a thick brown oil (561.4 mg, 90% yield). The crude product was used in the cross-coupling with no further purification.

<sup>7</sup> Lölsberg, W.; Ye, S.; Schmalz, H. G. *Adv. Synth. Catal.* **2010**, *352*, 2023.

<sup>8</sup> Penjšević, J.; Šukalović, V.; Andrić, D.; Kostić-Rajačić, S.; Šoškić, V.; Roglić, G. *Arch. Pharm. Chem. Life Sci.* **2007**, *340*, 456.

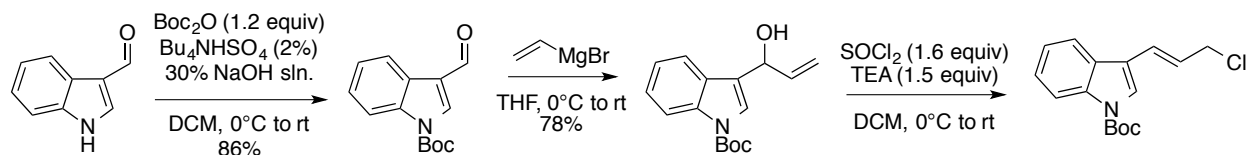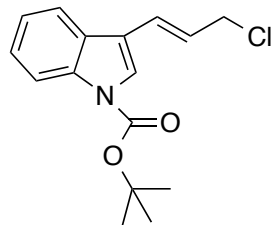

**tert-butyl (E)-3-(3-chloroprop-1-en-1-yl)-1H-indole-1-carboxylate. (Compound SI-4).**

<sup>1</sup>H NMR (600 MHz, CDCl<sub>3</sub>): δ 8.17 (1H, s), 7.76 (1H, d, *J* = 8.5 Hz), 7.66 (1H, s), 7.36 (1H, t, *J* = 7.8 Hz), 7.30 (1H, t, *J* = 6.0 Hz), 6.77 (1H, d, *J* = 15.6 Hz), 6.42 (1H, dt, *J* = 15.6 Hz, 7.2 Hz), 4.29 (2H, d, *J* = 7.2 Hz), 1.68 (9H, s); <sup>13</sup>C NMR (125 MHz, CDCl<sub>3</sub>): δ 149.4, 135.9, 128.4, 125.7, 125.1, 125.1, 124.8, 124.8, 123.0, 119.8, 115.4, 84.1, 46.1, 28.2, 28.2, 28.2; IR (neat): 2979 (w) 2933 (w), 1732 (s), 1654 (w), 1607 (w), 1557 (w), 1476 (w), 1451 (m), 1368 (m), 1309 (m), 1254 (w), 1232 (m), 1153 (s), 1092 (w), 1043 (m), 1021 (w), 960 (w), 910 (w), 856 (w), 838 (w), 765 (w), 745 (m), 678 (m), 654 (m) cm<sup>-1</sup>; HRMS- (ESI<sup>+</sup>) for C<sub>16</sub>H<sub>19</sub>ClN<sub>1</sub>O<sub>2</sub> [M+H]<sup>+</sup>: calculated: 292.1104, found: 292.1116.

**Preparation of (E)-(5-chloropent-3-en-1-yl)benzene (Compound 35).** From 5-phenylpent-1-en-3-ol, prepared from commercially available hydrocinnamaldehyde as shown below, the representative procedure was followed with the following modifications: the reaction was run on a 5.0 mmol scale and stirred for 3 hours at room temperature instead of only 1. The crude product was purified by kugelrohr distillation (hi-vacuum, 110 °C) to afford a clear, colorless oil (773.2 mg, 86% yield). Isolated as a 83:17 mixture of linear:branched isomers, spectral data is in accordance with the literature.<sup>9</sup>

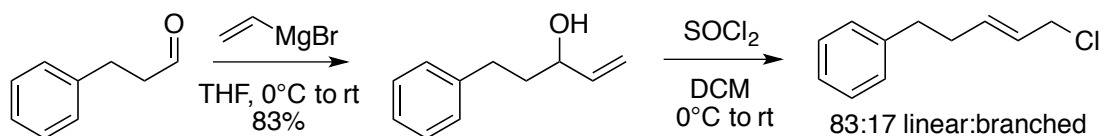

**Preparation of 4,4,5,5-tetramethyl-2-(3-methylbut-2-en-1-yl)-1,3,2-dioxaborolane (Compound 9).**<sup>10</sup>

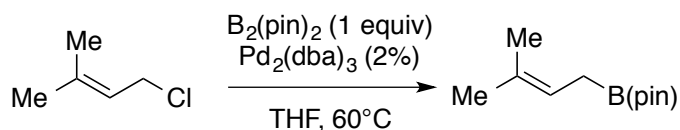

<sup>9</sup> Fuchter, M. J.; Levy, J.-N. *Org. Lett.* **2008**, *10*, 4919.

<sup>10</sup> Adapted from: Zhang, P.; Roundtree, I. A.; Morken, J. P. *Org. Lett.* **2012**, *14*, 1416.

An oven-dried scintillation vial equipped with a magnetic stir bar was charged with Pd<sub>2</sub>(dba)<sub>3</sub> (54.9 mg, 0.06 mmol), bis(pinacolato)diboron (762.6 mg, 3.00 mmol), and tetrahydrofuran (1.5 mL) in a dry-box under argon atmosphere. The vial was capped and stirred for two minutes, then 1-chloro-3-methylbut-2-ene (313.7 mg, 3.00 mmol) was added. The vial was capped with a teflon cone-lined cap, sealed with electrical tape, removed from the dry-box, and heated to 60 °C and allowed to stir for 12 h. The reaction was then concentrated *in vacuo* and the crude reaction mixture was purified rapidly on oven-dried silica gel (fast gradient of 50:1-20:1 pentane:diethyl ether) to afford a clear, colorless oil (364 mg, 62% yield). R<sub>f</sub> = 0.53 (20:1 pentane:diethyl ether, stain in KMnO<sub>4</sub>). Spectral data is in accordance with the literature.<sup>11</sup>

### Preparation of $\alpha,\alpha$ -Disubstituted and Cyclic Allylboron Reagents.<sup>12</sup>

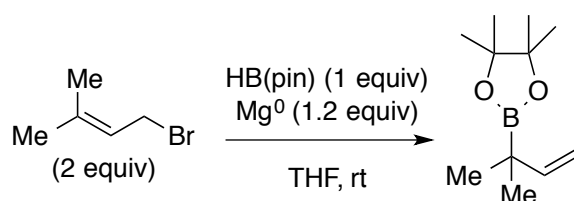

**Representative Procedure (Compound 19):** An oven-dried round-bottomed flask equipped with a magnetic stir bar was charged with magnesium turnings (292 mg, 12.0 mmol), pinacol borane (HBpin) (1.28 g, 10.0 mmol), and tetrahydrofuran (15 mL) in a dry-box under argon atmosphere. One equivalent of 1-bromo-3-methylbut-2-ene (1.49 g, 10.0 mmol) was added dropwise over 5 minutes with stirring, and the solution was capped and stirred an additional 30 minutes. A second equivalent of 1-bromo-3-methylbut-2-ene (1.49 g, 10.0 mmol) was added dropwise, and the solution was sealed with a septa and electrical tape, removed from the dry-box, and stirred under nitrogen for an additional 2 hours at room temperature. The solution was then cooled to 0 °C, diluted with hexanes (50 mL) and quenched with dropwise addition of aqueous 0.1 M HCl (90 mL). After stirring for 10 minutes, the solution was transferred to a separatory funnel and extracted with hexanes (3 X 75 mL). The combined organics were dried over magnesium sulfate, filtered, and concentrated *in vacuo*. The crude reaction mixture was purified by kugelrohr distillation (hi-vacuum, 80 °C) to afford a clear, colorless oil (1.42 g, 72% yield)(Compound 14). Spectral data is in accordance with the literature.<sup>12</sup>

**Preparation of 4,4,5,5-tetramethyl-2-(1-vinylcyclohexyl)-1,3,2-dioxaborolane.** From 1-(chloromethyl)cyclohex-1-ene, prepared from cyclohexanone as shown below, the representative procedure was followed with the following modifications: the reaction was run on a 4.0 mmol scale using only one equivalent of chloride and 1.2 equivalents of Mg<sup>0</sup> and HB(pin)

<sup>11</sup> Wu, J. Y.; Moreau, B.; Ritter, T. *J. Am. Chem. Soc.* **2009**, *131*, 12915.

<sup>12</sup> Clary, J. W.; Rettenmaier, T. J.; Snelling, R.; Bryks, W.; Banwell, J.; Wipke, W. T.; Singaram, B. *J. Org. Chem.* **2011**, *76*, 9602.



and was run for 5 hours. The crude reaction mixture was purified by kugelrohr distillation (hi-vacuum, 90 °C) to afford a clear, colorless oil (704 mg, 75% yield).

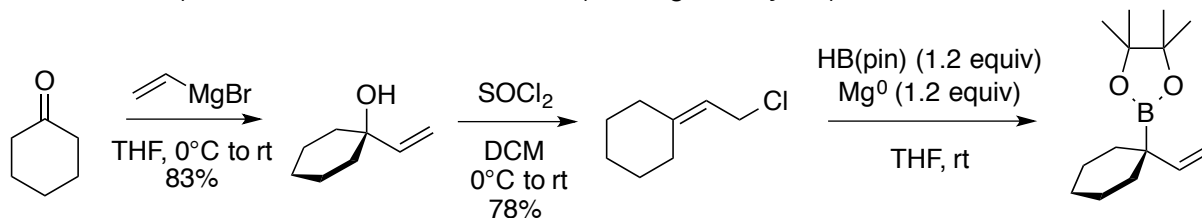

**4,4,5,5-tetramethyl-2-(1-vinylcyclohexyl)-1,3,2-dioxaborolane (Compound 23).** <sup>1</sup>H NMR (600 MHz, CDCl<sub>3</sub>): δ 5.78 (1H, dd, *J* = 17.0 Hz, 11.5 Hz), 4.90-4.94 (2H, m), 1.95 (2H, d, *J* = 13.0 Hz), 1.67 (2H, dt, *J* = 14.0 Hz, 3.5 Hz), 1.26-1.34 (2H, m), 1.23 (12H, s), 1.19-1.20 (4H, m); <sup>13</sup>C NMR (125 MHz, CDCl<sub>3</sub>): δ 145.6, 111.1, 85.1, 85.1, 33.7, 26.4, 26.4, 25.0, 24.8, 24.7, 24.7, 24.7, 24.7, 24.6; IR (neat): 2977 (w), 2924 (w), 2852 (w), 1449 (w), 1369 (s), 1336 (w), 1317 (w), 1306 (s), 1262 (w), 1231 (m), 1214 (w), 1165 (w), 1138 (s), 1109 (w), 1000 (m), 969 (w), 936 (m), 899 (m), 859 (w), 844 (w), 830 (w) cm<sup>-1</sup>; HRMS-(ESI+) for C<sub>14</sub>H<sub>26</sub>B<sub>1</sub>O<sub>2</sub> [M+H]<sup>+</sup>: calculated: 237.2026, found: 237.2029.

**Preparation of 4,4,5,5-tetramethyl-2-(3-methylpent-1-en-3-yl)-1,3,2-dioxaborolane.** From (E)-1-chloro-3-methylpent-2-ene, prepared from 2-butanone as shown below, the representative procedure was followed with the following modifications: the reaction was run on a 2.8 mmol scale using only one equivalent of chloride and 1.2 equivalents of Mg<sup>0</sup> and HB(pin) and was run for 4 hours. The crude reaction mixture was purified by kugelrohr distillation (hi-vacuum, 90 °C) to afford a clear, colorless oil (381 mg, 64% yield).

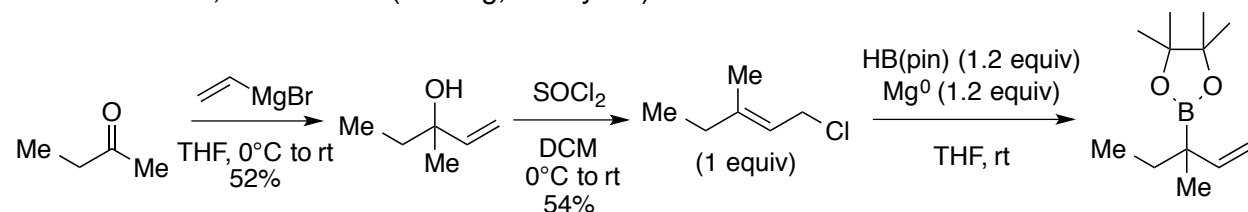

**4,4,5,5-tetramethyl-2-(3-methylpent-1-en-3-yl)-1,3,2-dioxaborolane (Compound 25).** <sup>1</sup>H NMR (600 MHz, CDCl<sub>3</sub>): δ 5.90 (1H, dd, *J* = 17.0 Hz, 9.5 Hz), 4.94 (1H, dd, *J* = 9.5 Hz, 1.0 Hz), 4.93 (1H, dd, *J* = 17.0 Hz, 2.0 Hz), 1.53-1.60 (2H, m), 1.22 (12H, s), 1.03 (3H, s), 0.86 (3H, dd (app t), *J* = 7.5 Hz, 7.5 Hz); <sup>13</sup>C NMR (125 MHz, CDCl<sub>3</sub>): δ 145.5, 111.0, 83.1, 83.1, 30.8, 24.7, 24.7, 24.7, 24.6, 19.1, 9.9; IR (neat): 2977 (m), 2931 (w), 2876 (w), 1627 (w), 1458 (m), 1371 (s), 1345 (s), 1131 (s), 1262 (m), 1214 (w), 1191 (w), 1165 (w), 1140 (s), 1113 (m), 1054 (w), 1030 (w), 1004 (w), 966 (m), 900 (s), 852 (w), 797 (w), 697 (w), 670 (m), 579 (w) cm<sup>-1</sup>; HRMS-(ESI+) for C<sub>12</sub>H<sub>24</sub>B<sub>1</sub>O<sub>2</sub> [M+H]<sup>+</sup>: calculated: 211.1869, found: 211.1870.

**Preparation of 2-(3,7-dimethylocta-1,6-dien-3-yl)-4,4,5,5-tetramethyl-1,3,2-dioxaborolane.**

From commercially available geranyl chloride, the representative procedure was followed with the following modifications: the reaction was run on a 3.0 mmol scale using only one equivalent of chloride and HB(pin) and 1.2 equivalents of Mg<sup>0</sup> and was run for 4 hours. The crude reaction mixture was purified by kugelrohr distillation (hi-vacuum, 150 °C) to afford a clear, colorless oil (495 mg, 87% yield).

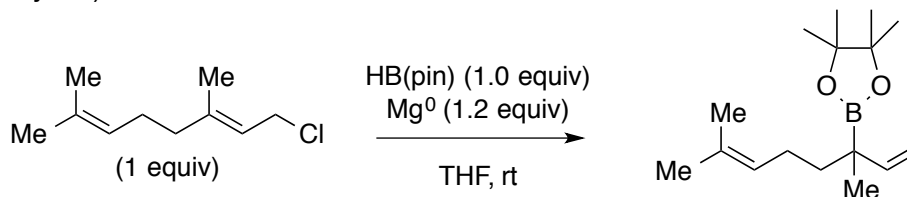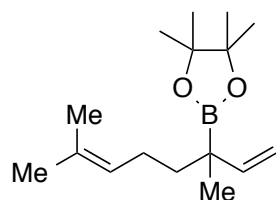**2-(3,7-dimethylocta-1,6-dien-3-yl)-4,4,5,5-tetramethyl-1,3,2-dioxaborolane (Compound 27).**

<sup>1</sup>H NMR (600 MHz, CDCl<sub>3</sub>): δ 5.91 (1H, dd, *J* = 17.5 Hz, 11.5 Hz), 5.12 (1H, dd (app t), *J* = 6.5 Hz, 6.5 Hz), 4.96 (1H, d, *J* = 11.5 Hz), 4.93 (1H, dd, *J* = 17.5 Hz, 2.0 Hz), 1.67 (3H, s), 1.59 (3H, s), 1.51 (1H, dddd (app dq), *J* = 14.0 Hz, 6.5 Hz, 6.5 Hz, 6.5 Hz), 1.36 (1H, dddd (app dq), *J* = 14.0 Hz, 6.5 Hz, 6.5 Hz, 6.5 Hz), 1.24 (2H, dd (app t), *J* = 6.5 Hz, 6.5 Hz), 1.22 (12H, s), 1.07 (3H, s); <sup>13</sup>C NMR (125 MHz, CDCl<sub>3</sub>): δ 145.4, 131.0, 125.1, 111.0, 83.1, 83.0, 38.3, 25.7, 24.7, 24.7, 24.7, 24.7, 24.6, 24.4, 19.5, 17.5; IR (neat): 2977 (m), 2926 (w), 1628 (w), 1457 (w), 1410 (w), 1372 (m), 1346 (m), 1311 (s), 1273 (w), 1214 (w), 1186 (w), 1165 (w), 1143 (s), 1109 (m), 1002 (w), 976 (m), 901 (m), 853 (m), 710 (w), 671 (w), 579 (w), 456 (w) cm<sup>-1</sup>; HRMS-(ESI<sup>+</sup>) for C<sub>16</sub>H<sub>30</sub>B<sub>1</sub>O<sub>2</sub> [M+H]<sup>+</sup>: calculated: 265.2399, found: 265.2346.

**Preparation of 2-(but-3-en-2-yl)-4,4,5,5-tetramethyl-1,3,2-dioxaborolane (Compound 29).**

From commercially available crotyl bromide, the representative procedure was followed on a 10 mmol scale. The crude reaction mixture was purified by kugelrohr distillation (hi-vacuum, 70 °C) to afford a clear, colorless oil (1.37 g, 75% yield). Spectral data is in accordance with the literature.<sup>12</sup>

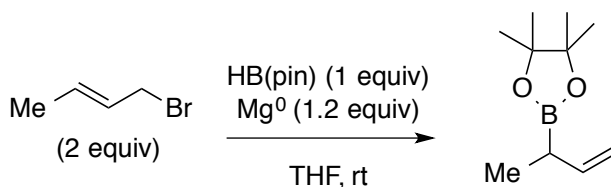

**Preparation of 2-(2-cyclohexylbut-3-en-2-yl)-4,4,5,5-tetramethyl-1,3,2-dioxaborolane.** From (E)-(4-chlorobut-2-en-2-yl)cyclohexane, prepared as shown below, the representative procedure was followed with the following modifications: the reaction was run on a 3.0 mmol scale using two equivalents of the chloride and one equivalent of the Mg<sup>0</sup> and HB(pin), and was run for 4

hours. The crude reaction mixture was purified by kugelrohr distillation (hi-vacuum, 180 °C) to afford a clear, colorless oil (827 mg, >96% yield) as a 8:1 mixture of branched product to regioisomers.

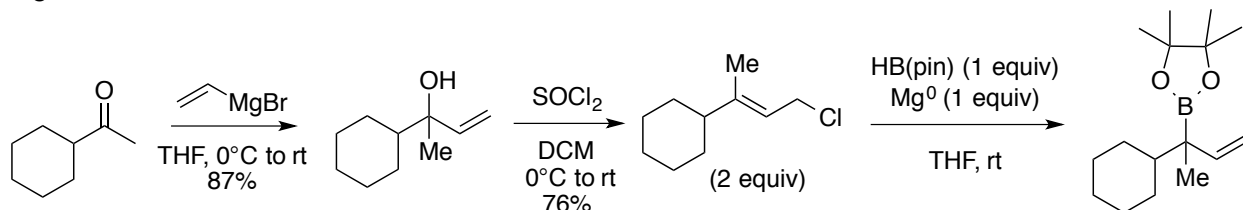

**2-(2-cyclohexylbut-3-en-2-yl)-4,4,5,5-tetramethyl-1,3,2-dioxaborolane (Compound 33).** <sup>1</sup>H NMR (600 MHz, CDCl<sub>3</sub>): δ 5.90 (1H, dd, *J* = 17.5 Hz, 11.0 Hz), 4.98 (1H, dd, *J* = 11.0 Hz, 2.0 Hz), 4.89 (1H, dd, *J* = 17.5 Hz, 1.0 Hz), 1.50-1.83 (11H, m), 1.21 (12H, s), 0.98 (3H, s); <sup>13</sup>C NMR (125 MHz, CDCl<sub>3</sub>): δ 145.0, 111.5, 83.0, 83.0, 44.2, 29.8, 27.0, 26.8, 26.8, 24.7, 24.7, 24.7, 24.7, 24.5, 24.5, 14.3; IR (neat): 2977 (m), 2923 (s), 2852 (m), 1510 (w), 1448 (m), 1411 (w), 1371 (w), 1341 (m), 1311 (s), 1271 (w), 1246 (w), 1214 (w), 1192 (w), 1140 (w), 1010 (w), 1088 (w), 984 (w), 966 (w), 898 (w), 852 (m), 722 (w), 673 (m), 579 (w) cm<sup>-1</sup>; HRMS-(ESI+) for C<sub>16</sub>H<sub>30</sub>B<sub>1</sub>O<sub>2</sub> [M+H]: calculated: 265.2339, found: 265.2350.

**Preparation of 4,4,5,5-tetramethyl-2-(2-methylenecyclopentyl)-1,3,2-dioxaborolane.** From 1-(chloromethyl)cyclopent-1-ene, prepared as shown below, the representative procedure was followed with the following modifications: the reaction was run on a 2.45 mmol scale using only one equivalent of chloride and 1.2 equivalents of Mg<sup>0</sup> and HB(pin) and was run for 5 hours. The crude reaction mixture was purified by kugelrohr distillation (hi-vacuum, 140 °C) to afford a clear, colorless oil (353.7 mg, 69% yield).

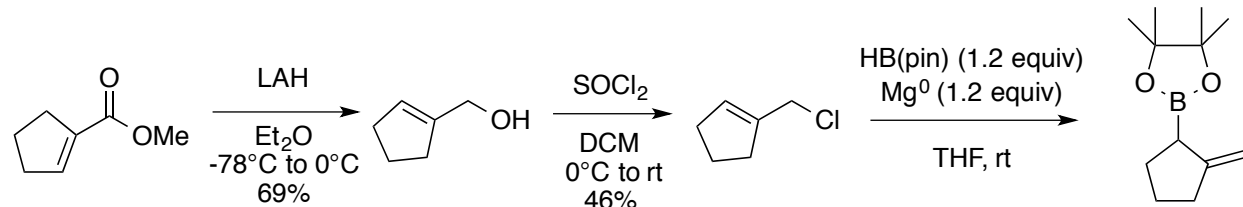

**4,4,5,5-tetramethyl-2-(2-methylenecyclopentyl)-1,3,2-dioxaborolane (Compound SI-5).** <sup>1</sup>H NMR (600 MHz, CDCl<sub>3</sub>): δ 4.86 (1H, dd (app t), *J* = 2.5 Hz, 2.5 Hz), 4.84 (1H, dd (app t), *J* = 2.0 Hz, 2.0 Hz), 2.24-2.35 (2H, m), 2.06 (1H, dd (app t), *J* = 8.0 Hz, 8.0 Hz), 1.83-1.88 (1H, m), 1.66-1.78 (2H, m), 1.54-1.62 (1H, m), 1.24 (12H, s); <sup>13</sup>C NMR (125 MHz, CDCl<sub>3</sub>): δ 154.6, 104.2, 83.0, 83.0, 34.4, 29.3, 27.2, 24.8, 24.7, 24.7, 24.6, 24.6; IR (neat): 2978 (w), 2951 (w), 2868 (w), 1644 (w), 1470 (w), 1450 (w), 1357 (s), 1319 (s), 1273 (w), 1213 (w), 1167 (w), 1143 (s), 1115

(w), 1007 (w), 970 (m), 872 (m), 853 (m), 672 (w), 579 (w)  $\text{cm}^{-1}$ ; HRMS-(ESI+) for  $\text{C}_{12}\text{H}_{22}\text{B}_1\text{O}_2$  [M+H]: calculated: 209.1713, found: 209.1722.

**Preparation of 4,4,5,5-tetramethyl-2-(2-methylenecyclohexyl)-1,3,2-dioxaborolane.** From 1-(chloromethyl)cyclohex-1-ene, prepared as shown below, the representative procedure was followed with the following modifications: the reaction was run on a 3.1 mmol scale using only one equivalent of HB(pin) and 1.2 equivalents of  $\text{Mg}^0$  and was run for 5 hours. The crude reaction mixture was purified by kugelrohr distillation (hi-vacuum, 140 °C) to afford a clear, colorless oil (422 mg, 61% yield).

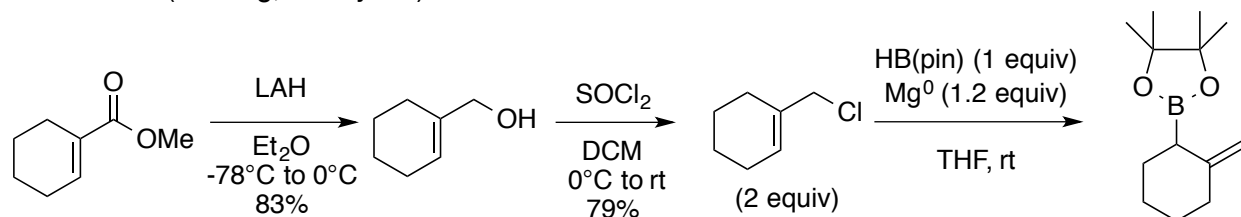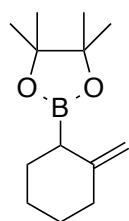

**4,4,5,5-tetramethyl-2-(2-methylenecyclohexyl)-1,3,2-dioxaborolane (Compound SI-6).**  $^1\text{H}$  NMR (600 MHz,  $\text{CDCl}_3$ ):  $\delta$  4.64 (1H, d,  $J = 1.0$  Hz), 4.60 (1H, d,  $J = 2.5$  Hz), 2.12-2.18 (2H, m), 1.91-2.01 (2H, m), 1.78-1.82 (1H, m), 1.35-1.71 (4H, m), 1.24 (12H, s);  $^{13}\text{C}$  NMR (125 MHz,  $\text{CDCl}_3$ ):  $\delta$  151.0, 106.6, 83.2, 83.2, 35.4, 29.7, 28.4, 25.6, 24.8, 24.8, 24.7, 24.7, 24.7; IR (neat): 2878 (w), 2926 (m), 2855 (w), 1644 (w), 1447 (w), 1379 (m), 1360 (s), 1314 (s), 1272 (w), 1243 (w), 1214 (w), 1186 (w), 1165 (w), 1143 (s), 1109 (w), 1064 (w), 1005 (w), 989 (w), 965 (w), 877 (m), 863 (m), 847 (m), 819 (w), 736 (w), 671 (w), 578 (w)  $\text{cm}^{-1}$ ; HRMS-(ESI+) for  $\text{C}_{13}\text{H}_{24}\text{B}_1\text{O}_2$  [M+H]: calculated: 223.1869, found: 223.1873.

**Preparation of 4,4,5,5-tetramethyl-2-(2-methylenecycloheptyl)-1,3,2-dioxaborolane.** From 1-(chloromethyl)cyclohept-1-ene, prepared as shown below,<sup>6</sup> the representative procedure was followed with the following modifications: the reaction was run on a 4.64 mmol scale using only one equivalent of chloride and 1.2 equivalents of  $\text{Mg}^0$  and HB(pin) and was run for 5 hours. The crude reaction mixture was purified by kugelrohr distillation (hi-vacuum, 160 °C) to afford a clear, colorless oil (929.5 mg, 85% yield) as a 3.3:1 ratio of branched to linear product.

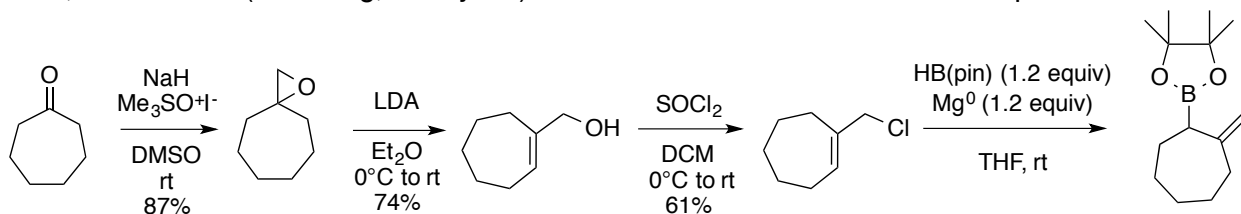

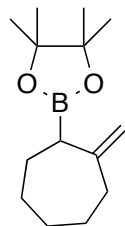

**4,4,5,5-tetramethyl-2-(2-methylenecycloheptyl)-1,3,2-dioxaborolane (Compound SI-7).**  $^1\text{H}$  NMR (500 MHz,  $\text{CDCl}_3$ ):  $\delta$  4.73 (1H, dd (app t),  $J = 1.0, 1.0$  Hz), 4.68 (1H, dd, 2.0 Hz, 1.0 Hz), 2.30 (1H, ddd,  $J = 11.0$  Hz, 5.5 Hz, 2.0 Hz), 2.18 (1H, ddd,  $J = 10.5$  Hz, 7.0 Hz, 2.5 Hz), 2.01-2.12 (2H, m), 1.65-1.81 (3H, m), 1.55-1.61 (1H, m), 1.4201.50 (1H, m), 1.25-1.40 (2H, m), 1.23 (12H, s);  $^{13}\text{C}$  NMR (125 MHz,  $\text{CDCl}_3$ ):  $\delta$  153.0, 110.5, 82.9, 82.9, 39.2, 36.1, 30.3, 30.0, 29.2, 29.1, 24.6, 24.6, 24.6, 24.6; IR (neat): 2977 (w), 2920 (m), 2850 (w), 1631 (w), 1446 (w), 1370 (s), 1356 (s), 1314 (s), 1272 (w), 1214 (w), 1197 (w), 1165 (w), 1143 (s), 1104 (w), 1005 (w), 984 (w), 877 (m), 850 (m), 737 (w), 670 (w), 579 (w)  $\text{cm}^{-1}$ ; HRMS-(ESI+) for  $\text{C}_{14}\text{H}_{26}\text{B}_1\text{O}_2$  [M+H]: calculated: 237.2026, found: 237.2027.

### Experimental Procedure for Allyl-Allyl Coupling.

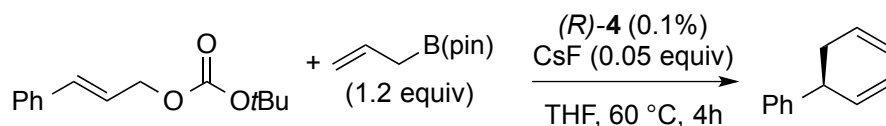

**Representative Procedure A:** An oven-dried scintillation vial equipped with a magnetic stir bar was charged successively with with *(R)*-4 (0.29 mg, 0.4  $\mu\text{mol}$ ), THF (0.8 mL), *tert*-butyl cinnamyl carbonate (93.7 mg, 0.4 mmol), allylB(pin) (80.7 mg, 0.48 mmol), and cesium fluoride (3.1 mg, 0.02 mmol) in a dry-box under argon atmosphere. The vial was sealed, removed from the dry-box, and heated to 60  $^\circ\text{C}$  while allowing to stir for 4 h. After this time, the reaction mixture was diluted with diethyl ether, filtered through a plug of silica gel and concentrated *in vacuo*. The crude reaction mixture was purified on silica gel (pentane) to afford a clear, colorless oil (60.0 mg, 95% yield).

**Representative Procedure for Bench-top Reaction Setup:** An oven-dried scintillation vial equipped with a magnetic stir bar was charged with with *(R)*-4 (0.58 mg, 0.8  $\mu\text{mol}$ ), cesium fluoride (6.1 mg, 0.04 mmol), and *tert*-butyl cinnamyl carbonate (187.4 mg, 0.8 mmol) on the benchtop. The vial was sealed with an open-top cap with a silicon/teflon septum and purged with nitrogen for 15 minutes. A solution of allylB(pin) (161.4 mg, 0.96 mmol) in dry THF (1.6 mL) was added under nitrogen. The vial was sealed with electrical tape and heated to 60  $^\circ\text{C}$  while allowing to stir for 4 h. After this time, the reaction mixture was diluted with diethyl ether, filtered through a plug of silica gel and concentrated *in vacuo*. The crude reaction mixture was purified on silica gel (pentane) to afford a clear, colorless oil (122 mg, >96% yield).

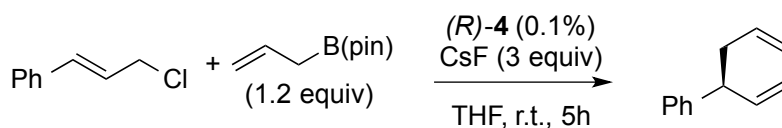

**Representative Procedure B:** An oven-dried scintillation vial equipped with a magnetic stir bar was charged successively with with (*R*)-**4** (0.29 mg, 0.4  $\mu$ mol), THF (0.8 mL), cinnamyl chloride (61.1 mg, 0.4 mmol), allylB(pin) (80.7 mg, 0.48 mmol), and cesium fluoride (182 mg, 1.2 mmol) in a dry-box under argon atmosphere. The vial was sealed, removed from the dry-box, and allowed to stir for 5 h at room temperature. After this time, the reaction mixture was diluted with diethyl ether, filtered through a plug of silica gel and concentrated *in vacuo*. The crude reaction mixture was purified on silica gel (pentane) to afford a clear, colorless oil (58.0 mg, 92% yield).

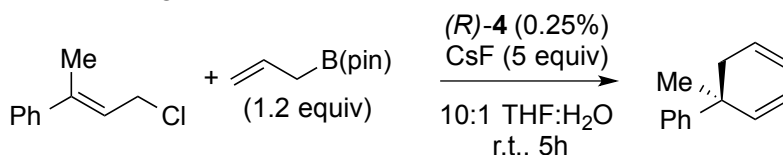

**Representative Procedure C:** An oven-dried scintillation vial equipped with a magnetic stir bar was charged successively with with (*R*)-**4** (0.36 mg, 0.5  $\mu$ mol), THF (0.4 mL), (*E*)-(4-chlorobut-2-en-2-yl)benzene (33.2 mg, 0.2 mmol), allylB(pin) (40.4 mg, 0.24 mmol), and cesium fluoride (151.9 mg, 1.0 mmol) in a dry-box under argon atmosphere. The vial was sealed with an open-top cap with a silicon/teflon septum, removed from the dry-box, and degassed deionized water (0.04 mL) was added under nitrogen. The vial was sealed with electrical tape and allowed to stir for 5 h at room temperature. After this time, the reaction mixture was diluted with diethyl ether, filtered through a plug of silica gel and concentrated *in vacuo*. The crude reaction mixture was purified on silica gel (pentane) to afford a clear, colorless oil (29.3 mg, 85% yield).

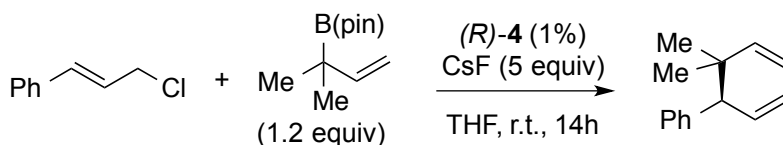

**Representative Procedure D:** An oven-dried scintillation vial equipped with a magnetic stir bar was charged successively with with (*R*)-**4** (1.44 mg, 2.0  $\mu$ mol), THF (0.4 mL), cinnamyl chloride (30.5 mg, 0.2 mmol), 4,4,5,5-tetramethyl-2-(2-methylbut-3-en-2-yl)-1,3,2-dioxaborolane (47.1 mg, 0.24 mmol), and cesium fluoride (151.9.1 mg, 1.0 mmol) in a dry-box under argon atmosphere. The vial was sealed, removed from the dry-box, and allowed to stir for 14 h at room temperature. After this time, the reaction mixture was diluted with diethyl ether, filtered through a plug of silica gel and concentrated *in vacuo*. The crude reaction mixture was purified on silica gel (pentane) to afford a clear, colorless oil (35.3 mg, 95% yield).

### Characterization of Products and Analysis of Stereochemistry

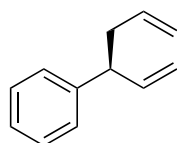

**(*S*)-hexa-1,5-dien-3-ylbenzene (Compound 3a).** The title compound was prepared *via* representative procedure **B** for allyl-allyl coupling. The crude reaction mixture was purified on silica gel (pentane) to afford a clear, colorless oil (58.1 mg, 92% yield).  $R_f = 0.68$  (pentane, stain in  $\text{KMnO}_4$ ). Spectral data is in accordance with the literature.<sup>13</sup>

<sup>13</sup> Zhang, P.; Brozek, L. A.; Morcken, J. P. *J. Am. Chem. Soc.* **2010**, *132*, 10686.

**Analysis of Stereochemistry:**

The enantiomer ratio was determined by GLC analysis of the title compound as compared to racemic material prepared by using 2,2'-bis(diphenylphosphino)-1,1'-binaphthyl (*rac*-BINAP) as the ligand in the allyl-allyl coupling reaction. The absolute stereochemistry for the product of allyl-allyl coupling with (*R*)-(+)-2,2'-bis(di-2-furanylphosphino)-6,6'-dimethoxy-1,1'-biphenyl [(*R*)-Methoxy(furyl)BIPHEP] has been previously proven.<sup>13</sup>

*Chiral GLC (CD-BDM, Supelco, 50 °C for 10 min, ramp 0.25 °C/min to 100 °C for 10 min, 20 psi) - analysis of title compound.*

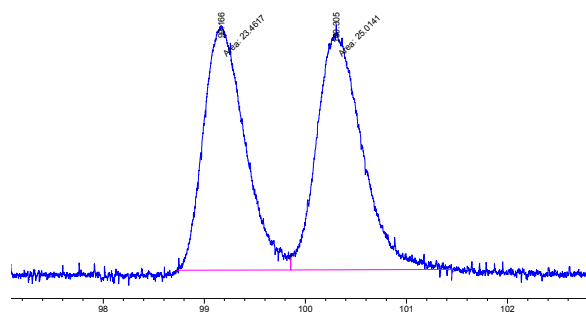

*Racemic Sample*

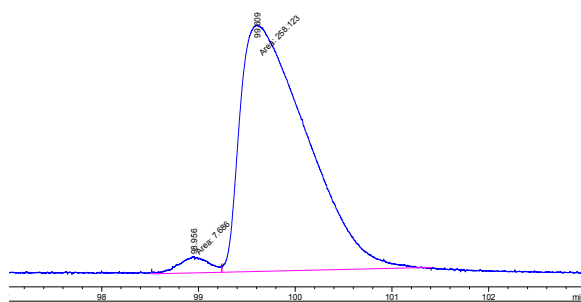

*Enantioenriched Sample*

| Peak # | RetTime [min] | Type | Width [min] | Area [pA*s] | Height [pA] | Area %   |
|--------|---------------|------|-------------|-------------|-------------|----------|
| 1      | 98.956        | MF   | 0.3575      | 7.68600     | 3.58281e-1  | 2.89154  |
| 2      | 99.609        | FM   | 0.7947      | 258.12347   | 5.41350     | 97.10846 |

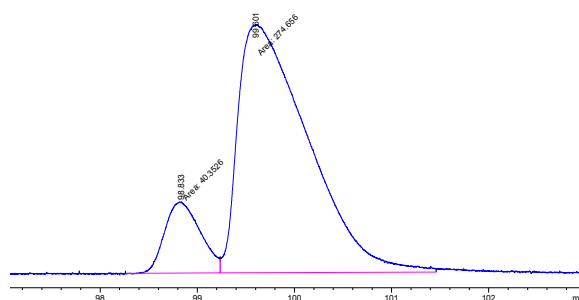

*Co-Injection of Racemic and Enantioenriched Samples*

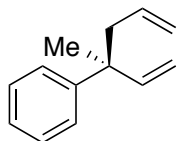

**(S)-(3-methylhexa-1,5-dien-3-yl)benzene (Compound 3b).** The title compound was prepared *via* representative procedure **C** for allyl-allyl coupling. The crude reaction mixture was purified on silica gel (pentane) to afford a clear, colorless oil (29.3 mg, 85% yield).  $R_f = 0.83$  (pentane, stain in  $\text{KMnO}_4$ ). Spectral data is in accordance with the literature.<sup>4</sup>

### Analysis of Stereochemistry:

The enantiomer ratio was determined by GLC analysis of the title compound as compared to racemic material prepared by using 2,2'-bis(diphenylphosphino)-1,1'-binaphthyl (*rac*-BINAP) as the ligand in the allyl-allyl coupling reaction. The absolute stereochemistry for the product of allyl-allyl coupling with (*R*)-(+)-2,2'-bis(di-2-furanylphosphino)-6,6'-dimethoxy-1,1'-biphenyl [(*R*)-Methoxy(furyl)BIPHEP] has been previously proven.<sup>4</sup>

Chiral GLC ( $\beta$ -dex, Supelco, 50 °C for 10 min, ramp 0.25 °C/min to 100 °C for 20 min, 20 psi) - analysis of title compound.

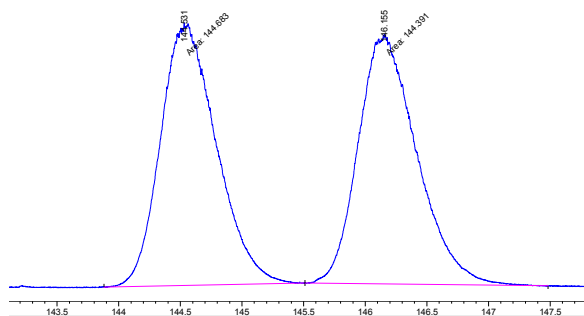

*Racemic Sample*

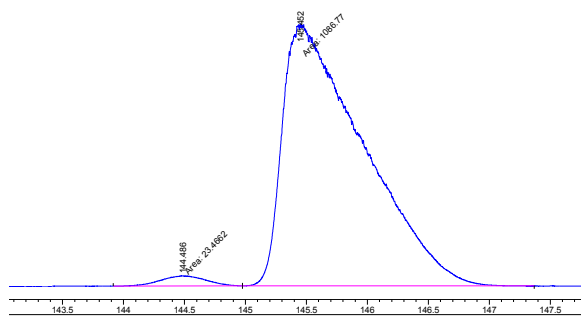

*Enantioenriched Sample*

| Peak # | RetTime [min] | Type | Width [min] | Area [pA*s] | Height [pA] | Area %   |
|--------|---------------|------|-------------|-------------|-------------|----------|
| 1      | 144.486       | MM   | 0.4269      | 23.46618    | 9.16100e-1  | 2.11362  |
| 2      | 145.452       | MM   | 0.7656      | 1086.76807  | 23.65905    | 97.88638 |

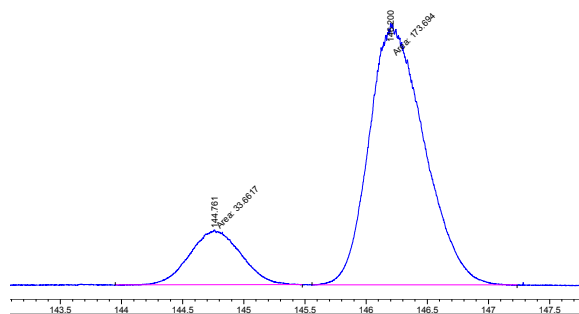

*Co-Injection of Racemic and Enantioenriched Samples*



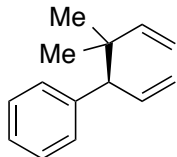

**(R)-(4,4-dimethylhexa-1,5-dien-3-yl)benzene (Compound 10).** The title compound was prepared *via* representative procedure **D** for allyl-allyl coupling. <sup>1</sup>H NMR (500 MHz, CDCl<sub>3</sub>): δ 7.27 (2H, dd (app t), *J* = 8.0 Hz, 8.0 Hz), 7.20 (1H, dd (app t), *J* = 8.0 Hz, 8.0 Hz), 7.17 (2H, dd (app t), *J* = 8.0 Hz, 8.0 Hz), 6.20 (1H, ddd (app dt), *J* = 17.0 Hz, 10.0 Hz, 10.0 Hz), 5.87 (1H, dd, *J* = 17.5 Hz, 10.5 Hz), 5.09 (1H, dd, *J* = 10.0 Hz, 2.0 Hz), 5.03 (1H, dd, *J* = 17.0 Hz, 2.0 Hz), 5.00 (1H, dd, *J* = 10.5 Hz, 1.5 Hz), 4.89 (1H, dd, *J* = 17.5 Hz, 1.5 Hz), 3.10 (1H, d, *J* = 10.0 Hz), 1.03 (3H, s), 0.96 (3H, s); <sup>13</sup>C NMR (125 MHz, CDCl<sub>3</sub>): δ 146.0, 142.0, 138.7, 129.3, 129.3, 127.7, 127.7, 126.1, 116.4, 111.8, 61.0, 39.8, 25.9, 25.2; IR (neat): 3081 (w), 3028 (w), 3006 (m), 2963 (w), 2928 (w), 2873 (w), 1637 (w), 1493 (w), 1453 (w), 1170 (w), 1072 (w), 994 (m), 912 (s), 783 (w), 732 (m), 701 (s), 668 (w), 521 (w) cm<sup>-1</sup>; HRMS-(ESI+) for C<sub>14</sub>H<sub>19</sub> [M+H]<sup>+</sup>: calculated: 187.1487, found: 187.1489. [α]<sub>D</sub><sup>22</sup> = + 76.8330 (*c* = 1.66, CHCl<sub>3</sub>). The crude reaction mixture was purified on silica gel (pentane) to afford a clear, colorless oil (35.3 mg, 95% yield). R<sub>f</sub> = 0.78 (pentane, stain in KMnO<sub>4</sub>). Spectral data is also in accordance with the literature.<sup>14</sup>

### Analysis of Stereochemistry:

The enantiomer ratio was determined by GLC analysis of the title compound as compared to racemic material prepared by using 2,2'-bis(diphenylphosphino)-1,1'-binaphthyl (*rac*-BINAP) as the ligand in the allyl-allyl coupling reaction. The absolute stereochemistry was assigned by analogy to product **3a**.

Chiral GLC (*β*-dex, Supelco, 50 °C for 10 min, ramp 1 °C/min to 120 °C for 10 min, 20 psi) - analysis of title compound.

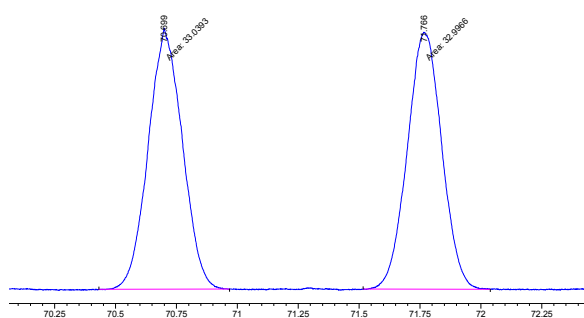

*Racemic Sample*

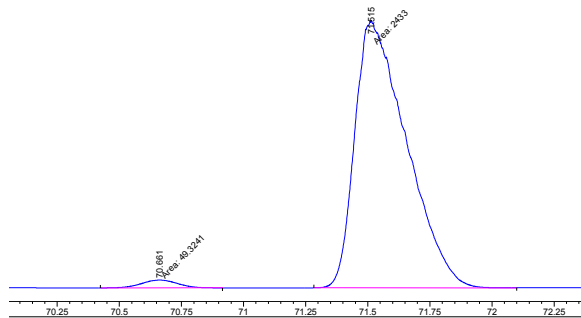

*Enantioenriched Sample*

| Peak # | RetTime [min] | Type | Width [min] | Area [pA*s] | Height [pA] | Area %   |
|--------|---------------|------|-------------|-------------|-------------|----------|
| 1      | 70.661        | MM   | 0.1648      | 49.32411    | 4.98884     | 1.98702  |
| 2      | 71.515        | MM   | 0.2400      | 2432.99634  | 168.98608   | 98.01298 |

<sup>14</sup> Hosomi, A.; Imai, T.; Endo, M.; Sakurai, H. *J. Organomet. Chem.* **1985**, *285*, 95.

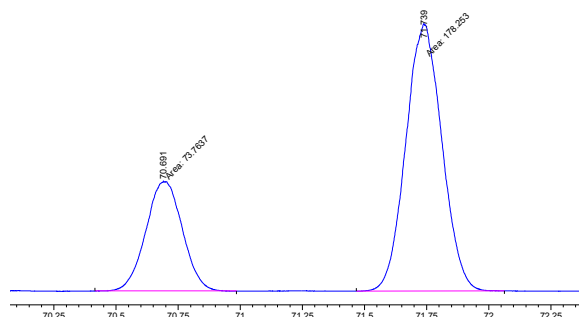

**Co-Injection of Racemic and  
Enantioenriched Samples**

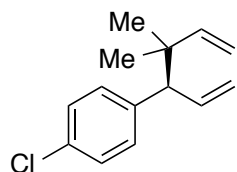

**(R)-1-chloro-4-(4,4-dimethylhexa-1,5-dien-3-yl)benzene (Compound 20).** The title compound was prepared *via* representative procedure **D** for allyl-allyl coupling utilizing (*E*)-1-chloro-4-(3-chloroprop-1-en-1-yl)benzene. <sup>1</sup>H NMR (500 MHz, CDCl<sub>3</sub>): δ 7.23 (2H, ddd (app dt), *J* = 8.0 Hz, 2.0 Hz, 2.0 Hz), 7.08 (2H, ddd (app dt), *J* = 8.0 Hz, 2.0 Hz, 2.0 Hz), 6.13 (1H, ddd, *J* = 17.0 Hz, 10.5 Hz, 9.0 Hz), 5.82 (1H, dd, *J* = 17.5 Hz, 10.5 Hz), 5.10 (1H, dd, *J* = 10.5 Hz, 2.0 Hz), 5.02 (1H, ddd (app dt), *J* = 17.0 Hz, 2.0 Hz, 2.0 Hz), 5.00 (1H, dd, *J* = 10.5 Hz, 1.5 Hz), 4.87 (1H, dd, *J* = 17.5 Hz, 1.5 Hz), 3.08 (1H, d, *J* = 9.0 Hz), 1.01 (3H, s), 0.93 (3H, s); <sup>13</sup>C NMR (125 MHz, CDCl<sub>3</sub>): δ 145.5, 140.5, 138.2, 131.9, 130.6, 130.6, 127.8, 127.8, 116.8, 112.3, 60.3, 39.8, 25.8, 25.2; IR (neat): 3081 (w), 2965 (m), 2928 (w), 2873 (w), 1637 (w), 1491 (s), 1461 (w), 1414 (w), 1406 (w), 1379 (w), 1363 (w), 1170 (w), 1092 (w), 1014 (m), 994 (m), 914 (s), 826 (s), 763 (m), 717 (w), 522 (m) cm<sup>-1</sup>; HRMS-(ESI +) for C<sub>14</sub>H<sub>18</sub>Cl [M+H]: calculated: 221.1097, found: 221.1104. [α]<sub>D</sub><sup>22</sup> = + 93.3926 (*c* = 1.28, CHCl<sub>3</sub>). The crude reaction mixture was purified on silica gel (pentane) to afford a clear, colorless oil (40.5 mg, 92% yield). R<sub>f</sub> = 0.74 (pentane, stain in KMnO<sub>4</sub>).

**Analysis of Stereochemistry:**

The enantiomer ratio was determined by GLC analysis of the title compound as compared to racemic material prepared by using 2,2'-bis(diphenylphosphino)-1,1'-binaphthyl (*rac*-BINAP) as the ligand in the allyl-allyl coupling reaction. The absolute stereochemistry was assigned by analogy to compound **3a**.

Chiral GLC ( $\beta$ -dex, Supelco, 50 °C for 50 min, ramp 1 °C/min to 140 °C for 10 min, 20 psi) - analysis of title compound.

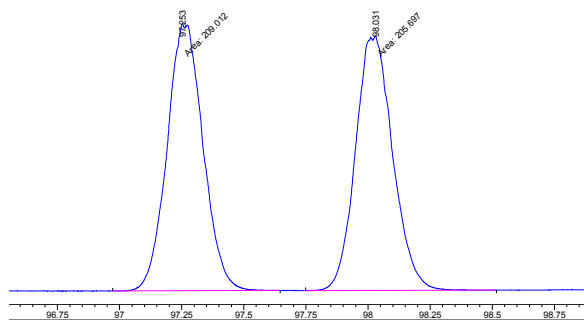

*Racemic Sample*

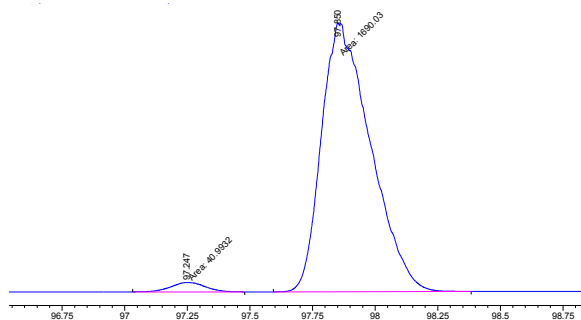

*Enantioenriched Sample*

| Peak # | RetTime [min] | Type | Width [min] | Area [pA*s] | Height [pA] | Area %   |
|--------|---------------|------|-------------|-------------|-------------|----------|
| 1      | 97.247        | MM   | 0.1578      | 40.99323    | 4.33084     | 2.36815  |
| 2      | 97.850        | MM   | 0.2270      | 1690.03235  | 124.09972   | 97.63185 |

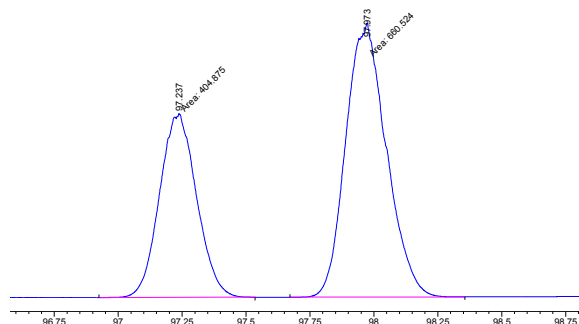

*Co-Injection of Racemic and Enantioenriched Samples*

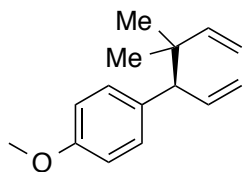

**(R)-1-(4,4-dimethylhexa-1,5-dien-3-yl)-4-methoxybenzene (Compound 21).** The title compound was prepared *via* representative procedure **D** for allyl-allyl coupling with (*E*)-1-(3-chloroprop-1-en-1-yl)-4-methoxybenzene.

<sup>1</sup>H NMR (500 MHz, CDCl<sub>3</sub>):  $\delta$  7.07 (2H, ddd (app dt),  $J$  = 9.0 Hz, 2.5 Hz, 2.5 Hz), 6.81 (2H, ddd (app dt),  $J$  = 9.0 Hz, 2.5 Hz, 2.5 Hz), 6.15 (1H, ddd,  $J$  = 17.5 Hz, 10.5 Hz, 9.5 Hz), 5.85 (1H, dd,  $J$  = 17.5, 10.5 Hz), 5.24 (1H, dd,  $J$  = 10.0 Hz, 2.5 Hz), 5.18 (1H, ddd,  $J$  = 17.0 Hz, 2.0 Hz, 1.0 Hz), 5.16 (1H, dd,  $J$  = 10.5 Hz, 1.5 Hz), 5.05 (1H, dd,  $J$  = 17.5 Hz, 1.5 Hz), 3.79 (3H, s), 3.05 (1H, d,  $J$  = 9.5 Hz), 1.00 (3H, s), 0.94 (3H, s); <sup>13</sup>C NMR (125 MHz, CDCl<sub>3</sub>):  $\delta$  157.9, 146.2, 138.9, 134.2, 130.1, 130.1, 116.1,

113.1, 113.1, 111.8, 60.0, 55.2, 39.9, 25.9, 25.1; IR (neat): 3079 (w), 2961 (m), 2931 (w), 2835 (w), 1637 (w), 1610 (m), 1582 (w), 1510 (s), 1464 (w), 1442 (w), 1414 (w), 1378 (w), 1362 (w), 1332 (w), 1301 (w), 1268 (s), 1245 (m), 1179 (m), 1123 (m), 1100 (m), 1038 (m), 995 (s), 919 (w), 828 (w), 781 (w), 765 (w), 686 (w), 644 (w), 579 (w), 540 (w)  $\text{cm}^{-1}$ ; HRMS-(ESI+) for  $\text{C}_{15}\text{H}_{21}\text{O}_1$  [M+H]<sup>+</sup>: calculated: 217.1592, found: 217.1598.  $[\alpha]_D^{22} = +81.6600$  ( $c = 0.55$ ,  $\text{CHCl}_3$ ). The crude reaction mixture was purified on silica gel (pentane) to afford a clear, colorless oil (19.4 mg, 90% yield).  $R_f = 0.15$  (pentane, stain in  $\text{KMnO}_4$ ).

### Analysis of Stereochemistry:

The enantiomer ratio was determined by GLC analysis of the title compound as compared to racemic material prepared by using 2,2'-bis(diphenylphosphino)-1,1'-binaphthyl (*rac*-BINAP) as the ligand in the allyl-allyl coupling reaction. The absolute stereochemistry was assigned by analogy to product **3a**.

Chiral GLC ( $\beta$ -dex, Supelco, 50 °C for 10 min, ramp 1 °C/min to 160 °C for 10 min, 20 psi) - analysis of title compound.

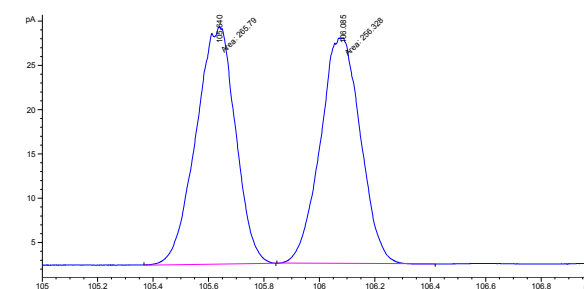

*Racemic Sample*

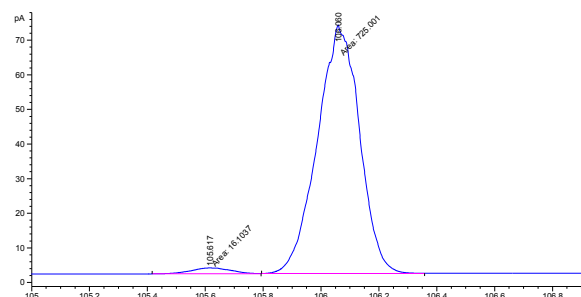

*Enantioenriched Sample*

| Peak # | RetTime [min] | Type | Width [min] | Area [pA*s] | Height [pA] | Area %   |
|--------|---------------|------|-------------|-------------|-------------|----------|
| 1      | 105.617       | MM   | 0.1576      | 16.10371    | 1.70270     | 2.17293  |
| 2      | 106.060       | MM   | 0.1682      | 725.00079   | 71.83309    | 97.82707 |

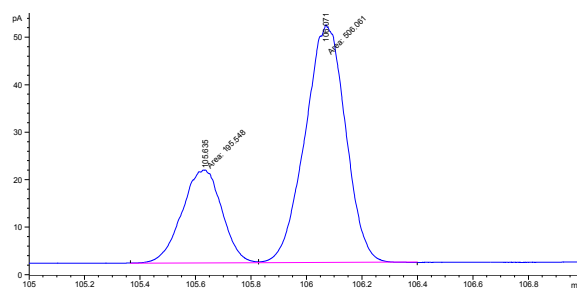

**Co-Injection of Racemic and  
Enantioenriched Samples**

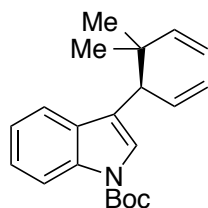

**tert-butyl (R)-3-(4,4-dimethylhexa-1,5-dien-3-yl)-1H-indole-1-carboxylate (Compound 22).** The title compound was prepared *via* representative procedure **D** for allyl-allyl coupling with *tert*-butyl (*E*)-3-(3-chloroprop-1-en-1-yl)-1H-indole-1-carboxylate. <sup>1</sup>H NMR (500 MHz, CDCl<sub>3</sub>): δ 8.09 (1H, s (br)), 7.57 (1H, d, *J* = 7.5 Hz), 7.41 (1H, s (br)), 7.29 (1H, ddd (app dt), *J* = 8.0 Hz, 8.0 Hz, 1.5 Hz), 7.22 (1H, ddd (app dt), *J* = 8.0 Hz, 8.0 Hz, 1.5 Hz), 6.11 (1H, ddd, *J* = 18.0 Hz, 9.5 Hz, 9.0 Hz), 5.97 (1H, dd, *J* = 17.0 Hz, 11.0 Hz), 5.04-5.07 (2H, m), 5.02 (1H, dd, *J* = 10.5 Hz, 1.5 Hz), 4.98 (1H, dd, *J* = 17.0 Hz, 1.5 Hz), 3.44 (1H, d, *J* = 9.0 Hz), 1.68 (9H, s), 1.10 (3H, s), 1.05 (3H, s); <sup>13</sup>C NMR (125 MHz, CDCl<sub>3</sub>): δ 146.2, 138.2, 131.3, 124.1, 123.1, 122.1, 121.0, 119.8, 115.9, 115.1, 115.1, 112.0, 110.0, 83.5, 51.1, 40.2, 28.2, 28.2, 28.2, 25.9, 25.2; IR (neat): 2975 (m), 2930 (w), 7314 (s), 1706 (w), 1637 (w), 1474 (w), 1452 (m), 1415 (w), 1368 (s), 1308 (w), 1252 (m), 1219 (w), 1156 (s), 1071 (m), 1017 (w), 913 (m), 860 (w), 839 (w), 767 (m), 744 (m) cm<sup>-1</sup>; HRMS-(ESI+) for C<sub>21</sub>H<sub>28</sub>N<sub>1</sub>O<sub>2</sub> [M+H]: calculated: 362.2118, found: 326.2120. [α]<sub>D</sub><sup>22</sup> = + 29.7186 (*c* = 1.78, CHCl<sub>3</sub>). The crude reaction mixture was purified on silica gel (50:1 pentane:diethyl ether) to afford a clear, colorless oil (53.3 mg, 82% yield). *R*<sub>f</sub> = 0.38 (50:1 pentane:diethyl ether, stain in KMnO<sub>4</sub>).

**Analysis of Stereochemistry:**

The enantiomer ratio was determined by SFC analysis of the title compound as compared to racemic material prepared by using 2,2'-bis(diphenylphosphino)-1,1'-binaphthyl (*rac*-BINAP) as the ligand in the allyl-allyl coupling reaction. The absolute stereochemistry was assigned by analogy to product **3a**.

Chiral SFC (ODR-H, Chiralpak, 1.5 mL/min, 1.0% *i*-PrOH, 100 bar, 35 °C) - analysis of title compound.

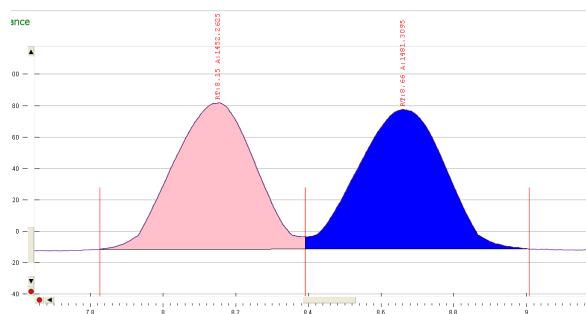

*Racemic Sample*

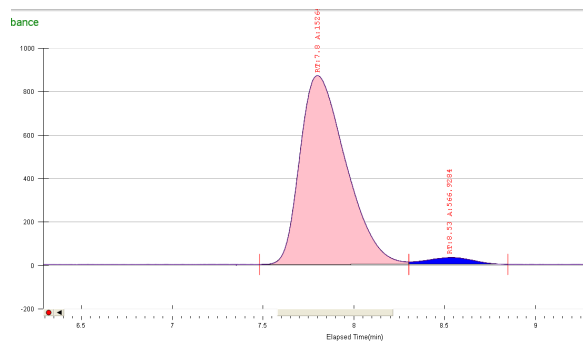

*Enantioenriched Sample*

| Peak No | % Area | Area       | RT (min) | Height (mV) | K'     |
|---------|--------|------------|----------|-------------|--------|
| 1       | 96.419 | 15264.6999 | 7.8      | 869.3087    | 0.0101 |
| 2       | 3.581  | 566.9284   | 8.53     | 31.7582     | 0.011  |
| Total:  | 100    | 15831.6283 |          |             |        |

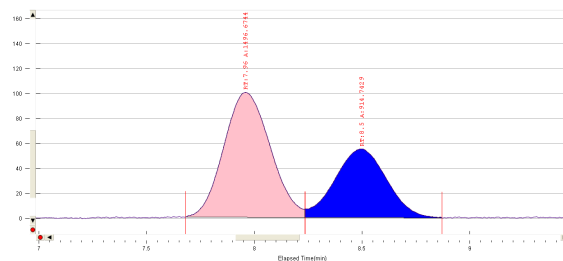

*Co-Injection of Racemic and Enantioenriched Samples*

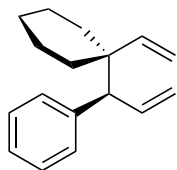

**(R)-1-(1-vinylcyclohexyl)allylbenzene (Compound 24).** The title compound was prepared *via* representative procedure **D** for allyl-allyl coupling with 4,4,5,5-tetramethyl-2-(3-methylpent-1-en-3-yl)-1,3,2-dioxaborolane (Compound 18) and cinnamyl chloride. <sup>1</sup>H NMR (500 MHz, CDCl<sub>3</sub>): δ 7.24 (2H, dd (app t), *J* = 7.0 Hz, 7.0 Hz), 7.17 (1H, dddd (app t), *J* = 7.5 Hz, 7.5 Hz, 1.5 Hz, 1.5 Hz), 7.15 (2H, dd (app t), *J* = 7.0 Hz, 7.0 Hz), 6.14 (1H, ddd (app dt), *J* = 7.0 Hz, 7.0 Hz), 5.54 (1H, dd, *J* = 18.0 Hz, 11.0 Hz), 5.26 (1H, dd, *J* = 11.5 Hz, 1.5 Hz), 5.06 (1H, dd, *J* = 10.0 Hz, 2.0 Hz), 5.02 (1H, dd, *J* = 17.0 Hz, 2.0 Hz), 4.89 (1H, dd, *J* = 18.0 Hz, 3.0 Hz), 3.12 (1H, d, *J* = 9.5 Hz), 1.83 (1H, d, *J* = 13.5 Hz), 1.38-1.53 (4H, m), 1.19-1.36 (5H, m); <sup>13</sup>C NMR (125 MHz, CDCl<sub>3</sub>): δ 142.8, 141.7, 138.6, 129.5, 129.5, 127.5, 127.5, 126.1, 116.0, 115.6, 42.6, 35.0, 34.3, 26.4, 26.4, 22.2, 22.0; IR (neat): 3077 (w), 3028 (w), 2976 (w), 2931 (s), 2853 (m), 1635 (w), 1601 (w), 1492 (w), 1452 (m), 1416 (w), 995 (m), 913 (s), 731 (m), 701 (s), 669 (w),

522 (w)  $\text{cm}^{-1}$ ; HRMS-(ESI+) for  $\text{C}_{17}\text{H}_{23}$  [M+H]: calculated: 227.1780, found: 227.1807;  $[\alpha]_D^{25} = +70.272$  ( $c = 0.91$ ,  $\text{CHCl}_3$ ). The crude reaction mixture was purified on silica gel (pentane) to afford a clear, colorless oil (38.4 mg, 85% yield).  $R_f = 0.75$  (pentane, stain in  $\text{KMnO}_4$ ).

**Analysis of Stereochemistry:**

The enantiomer ratio was determined by GLC analysis of the title compound as compared to racemic material prepared by using 2,2'-bis(diphenylphosphino)-1,1'-binaphthyl (*rac*-BINAP) as the ligand in the allyl-allyl coupling reaction. The absolute stereochemistry was assigned by analogy to product **3a**.

Chiral GLC ( $\beta$ -dex, Supelco, 50 °C for 10 min, ramp 1 °C/min to 140 °C for 60 min, 20 psi) - analysis of title compound.

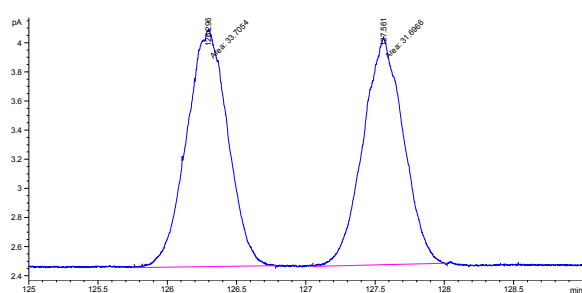

*Racemic Sample*

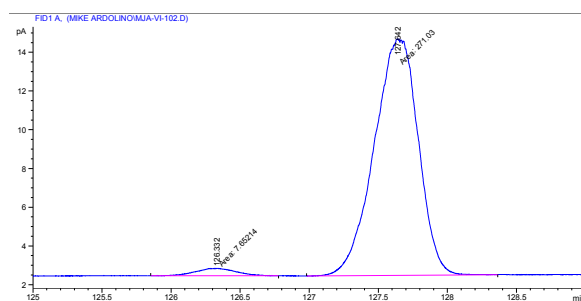

*Enantioenriched Sample*

| Peak # | RetTime [min] | Type | Width [min] | Area [pA*s] | Height [pA] | Area %   |
|--------|---------------|------|-------------|-------------|-------------|----------|
| 1      | 126.332       | MM   | 0.3354      | 7.65214     | 3.80289e-1  | 2.74583  |
| 2      | 127.642       | MM   | 0.3695      | 271.03003   | 12.22556    | 97.25417 |

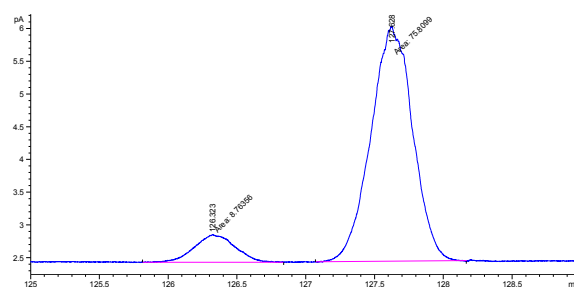

*Co-Injection of Racemic and Enantioenriched Samples*

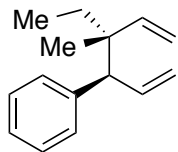

**((3*R*,4*R*)-4-ethyl-4-methylhexa-1,5-dien-3-yl)benzene (Compound 26).** The title compound was prepared *via* representative procedure **D** for allyl-allyl coupling with 4,4,5,5-tetramethyl-2-(3-methylpent-1-en-3-yl)-1,3,2-dioxaborolane (Compound 20) and cinnamyl chloride.  $^1\text{H}$  NMR (500 MHz,  $\text{CDCl}_3$ ):  $\delta$  7.26 (2H, dd (app t),  $J = 8.0$  Hz, 8.0 Hz), 7.15-7.21 (3H, m), 6.19 (1H, ddd (app dt),  $J = 17.0$  Hz, 10.0 Hz, 10.0 Hz), 5.76 (1H, dd,  $J = 18.0$  Hz, 11.0 Hz), 5.13 (1H, dd,  $J = 11.0$  Hz, 1.5 Hz), 5.08 (1H, dd,  $J = 17.0$  Hz, 2.0 Hz), 5.02 (1H, dd,  $J = 11.0$  Hz, 2.0 Hz), 4.86 (1H, dd,  $J = 18.0$  Hz, 2.5 Hz), 3.17 (1H, d,  $J = 9.0$  Hz), 1.49 (1H, (dq),  $J = 14.0$  Hz, 7.5 Hz, 7.5 Hz), 1.32 (1H, (dq),  $J = 14.0$  Hz, 7.5 Hz, 7.5 Hz, 7.5 Hz), 0.87 (3H, s), 0.79 (3H, dd (app t),  $J = 7.5$  Hz, 7.5 Hz);  $^{13}\text{C}$  NMR (125 MHz,  $\text{CDCl}_3$ ):  $\delta$  144.5, 141.9, 138.6, 129.6, 129.6, 127.6, 127.6, 126.1, 116.2, 113.7, 60.1, 43.3, 31.4, 19.4, 8.4; IR (neat): 3081 (w), 3028 (w), 2968 (m), 2934 (w), 2879 (w), 1637 (w), 1601 (w), 1492 (w), 1453 (m), 1414 (w), 1378 (w), 1135 (w), 1072 (w), 1061 (m), 1031 (w), 995 (w), 913 (s), 775 (w), 730 (m), 701 (s), 668 (w), 522 (w), 511 (w)  $\text{cm}^{-1}$ ; HRMS-(ESI+) for  $\text{C}_{15}\text{H}_{21}$  [ $\text{M}+\text{H}$ ]: calculated: 201.1643, found: 201.1643.  $[\alpha]^{22}_{\text{D}} = +75.487$  ( $c = 0.96$ ,  $\text{CHCl}_3$ ). The crude reaction mixture was purified on silica gel (pentane) to afford a clear, colorless oil (38.4 mg, 96% yield).  $R_f = 0.75$  (pentane, stain in  $\text{KMnO}_4$ ).

### Analysis of Stereochemistry:

The enantiomer ratio was determined by GLC analysis of the title compound as compared to racemic material prepared by using 2,2'-bis(diphenylphosphino)-1,1'-binaphthyl (*rac*-BINAP) as the ligand in the allyl-allyl coupling reaction. The absolute stereochemistry was assigned by analogy to products **3a** and **28**.

Chiral GLC ( $\beta$ -dex, Supelco, 50 °C for 10 min, ramp 0.25 °C/min to 120 °C for 20 min, 20 psi) - analysis of title compound.

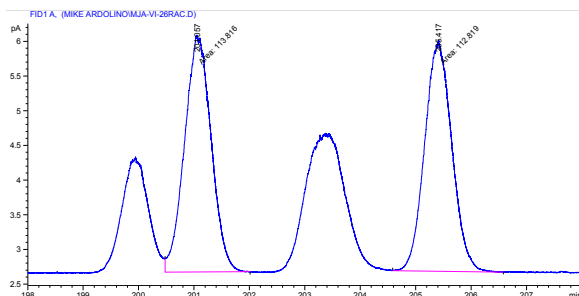

*Racemic Sample*

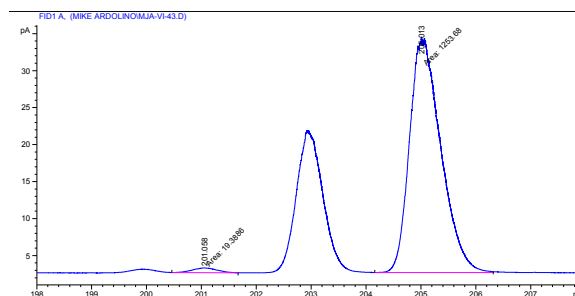

*Enantioenriched Sample*

| Peak # | RetTime [min] | Type | Width [min] | Area [pA*s] | Height [pA] | Area %   |
|--------|---------------|------|-------------|-------------|-------------|----------|
| 1      | 201.058       | MM   | 0.5059      | 19.38857    | 6.38724e-1  | 1.52298  |
| 2      | 205.013       | MF   | 0.6559      | 1253.68225  | 31.85507    | 98.47702 |



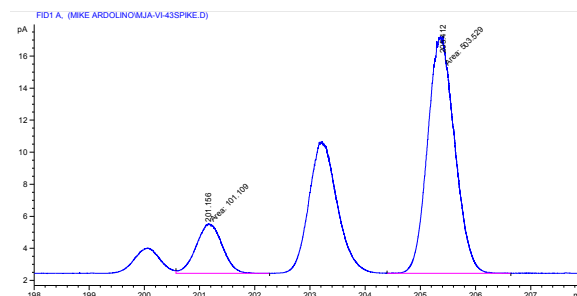

*Co-Injection of Racemic and Enantioenriched Samples*

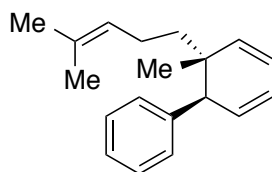

**((3*R*,4*R*)-4,8-dimethyl-4-vinylnona-1,7-dien-3-yl)benzene (Compound 28).** The title compound was prepared *via* representative procedure **D** for allyl-allyl coupling with 2-(3,7-dimethylocta-1,6-dien-3-yl)-4,4,5,5-tetramethyl-1,3,2-dioxaborolane (Compound 22) and cinnamyl chloride.  $^1\text{H}$  NMR (500 MHz,  $\text{CDCl}_3$ ):  $\delta$  7.25 (2H, ddd (app dt),  $J = 7.5$  Hz, 7.5 Hz, 1.5 Hz), 7.17-7.21 (1H, m), 7.15 (2H, dd (app t),  $J = 7.5$  Hz, 7.5 Hz), 6.18 (1H, ddd (app dt),  $J = 17.0$  Hz, 10.0 Hz, 10.0 Hz), 5.78 (1H, dd,  $J = 17.5$  Hz, 10.5 Hz), 4.99-5.13 (4H, m), 4.87 (1H, dd,  $J = 18.0$  Hz, 1.5 Hz), 3.15 (1H, dd,  $J = 18.0$  Hz, 1.5 Hz), 1.84-1.92 (2H, m), 1.67 (3H, d,  $J = 1.0$  Hz), 1.57 (3H, s), 1.39-1.45 (1H, m), 1.26-1.34 (1H, m), 0.91 (3H, s);  $^{13}\text{C}$  NMR (125 MHz,  $\text{CDCl}_3$ ):  $\delta$  144.5, 141.8, 138.6, 129.6, 127.7, 127.7, 127.7, 126.1, 124.9, 116.4, 113.7, 60.4, 42.7, 39.0, 25.7, 22.8, 20.1, 17.6; IR (neat): 3080 (w), 3029 (w), 2969 (m), 2922 (m), 2856 (w), 1636 (w), 1492 (w), 1453 (m), 1414 (w), 1374 (m), 1159 (w), 1121 (w), 1071 (w), 1030 (w), 995 (m), 913 (s), 828 (w), 782 (w), 734 (m), 702 (s), 669 (w), 523 (w)  $\text{cm}^{-1}$ ; HRMS-(ESI $^+$ ) for  $\text{C}_{19}\text{H}_{27}$  [M+H]: calculated: 255.2107, found: 255.2113.  $[\alpha]_D^{22} = +26.470$  ( $c = 0.92$ ,  $\text{CHCl}_3$ ). The crude reaction mixture was purified on silica gel (pentane) to afford a clear, colorless oil (46.7 mg, 92% yield).  $R_f = 0.64$  (pentane, stain in  $\text{KMnO}_4$ ).

### **Analysis of Stereochemistry:**

The title compound was treated with Hoveyda-Grubbs second generation catalyst to afford the ring closing metathesis product for GC analysis and determination of relative stereochemistry as depicted below. The analogous racemic material was prepared *via* the same route, using 2,2'-bis(diphenylphosphino)-1,1'-binaphthyl (*rac*-BINAP) as the ligand in the allyl-allyl coupling reaction.

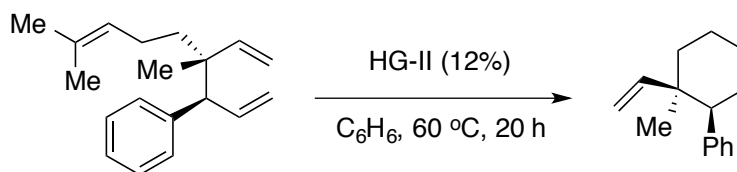

The absolute stereochemistry was assigned by analogy to compound **3a**. The relative stereochemistry was determined by NOESY analysis of the ring-closing metathesis product. The following NOE was observed:

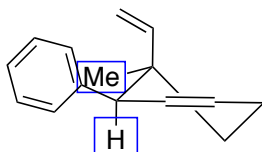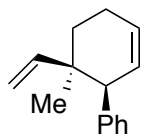

**(1R,2R)-2-methyl-2-vinyl-1,2,3,4-tetrahydro-1,1'-biphenyl (Compound SI-8).**

$^1\text{H}$  NMR (600 MHz,  $\text{CDCl}_3$ ):  $\delta$  7.25 (2H, dd (app t),  $J = 7.0$  Hz, 7.0 Hz), 7.19 (1H, dd, (app t),  $J = 7.5$  Hz, 7.5 Hz), 7.14 (2H, dd (app t),  $J = 8.0$  Hz, 8.0 Hz), 5.87-5.91 (1H, m), 5.81 (1H, dd,  $J = 17.5$  Hz, 11.0 Hz), 5.68-5.70 (1H, m), 4.80 (1H, dd,  $J = 11.0$  Hz, 1.0 Hz), 4.75 (1H, dd,  $J = 17.5$  Hz, 2.0 Hz), 3.20-3.22 (1H, m), 2.23-2.30 (1H, m), 2.12-2.18 (1H, m), 1.69 (1H, ddd (app dt),  $J = 13.0$  Hz, 7.0 Hz, 7.0 Hz), 1.54 (1H, ddd (app dt),  $J = 13.0$  Hz, 7.0 Hz, 7.0 Hz), 1.13 (3H, s);  $^{13}\text{C}$  NMR (125 MHz,  $\text{CDCl}_3$ ):  $\delta$  144.4, 142.3, 130.0, 130.0, 129.4, 127.3, 127.3, 126.9, 126.1, 111.5, 52.4, 38.7, 32.5, 25.1, 22.8; IR (neat): 3082 (w), 3061 (w), 3024 (w), 2959 (m), 2923 (w), 2871 (w), 2848 (w), 2363 (w), 1637 (w), 1491 (w), 1452 (m), 1434 (w), 1416 (w), 1371 (w), 1006 (m), 911 (w), 757 (m), 702 (s), 668 (w), 532 (w)  $\text{cm}^{-1}$ ; HRMS-(ESI+) for  $\text{C}_{15}\text{H}_{19}$  [M+H]: calculated: 199.1487, found: 199.1484.  $[\alpha]_D^{25} = -114.26$  ( $c = 1.00$ ,  $\text{CHCl}_3$ ). The crude reaction mixture was purified on silica gel (pentane) to afford a clear, colorless oil (3.0 mg, 33% yield).  $R_f = 0.66$  (pentane, stain in  $\text{KMnO}_4$ ).

Chiral GLC ( $\beta$ -dex, Supelco, 50 °C for 10 min, ramp 1 °C/min to 120 °C for 10 min, then 0.5 deg/min to 150 °C, 60 min, 20 psi) - analysis of RCM product SI-X.

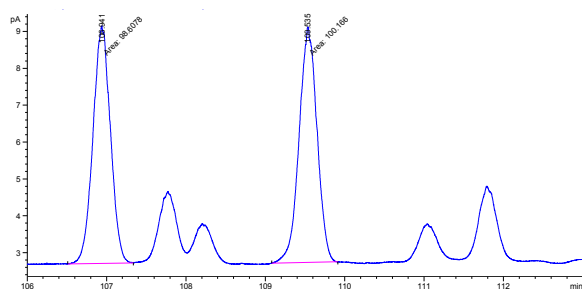

Racemic Sample

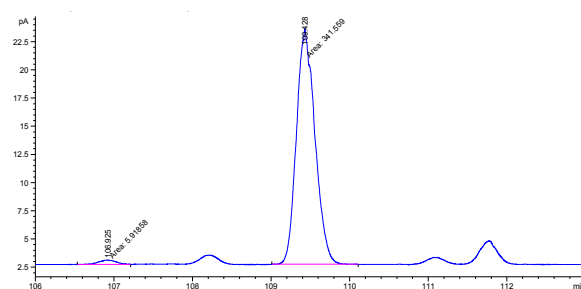

Enantioenriched Sample

| Peak # | RetTime [min] | Type | Width [min] | Area [pA*s] | Height [pA] | Area %   |
|--------|---------------|------|-------------|-------------|-------------|----------|
| 1      | 106.925       | MM   | 0.2545      | 5.91858     | 3.87627e-1  | 1.70330  |
| 2      | 109.428       | MM   | 0.2718      | 341.55917   | 20.94393    | 98.29670 |

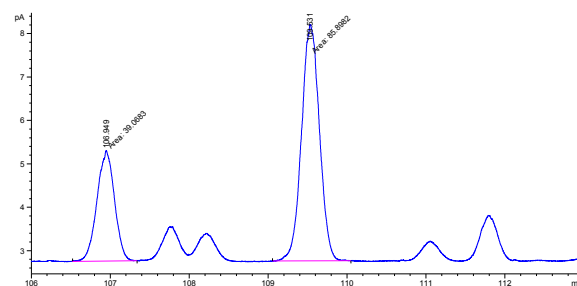

**Co-Injection of Racemic and  
Enantioenriched Samples**

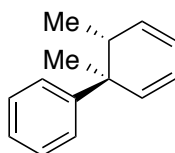

**((3R,4R)-3,4-dimethylhexa-1,5-dien-3-yl)benzene (Compound 30).** The title compound was prepared *via* representative procedure **D** for allyl-allyl coupling with 2-(but-3-en-2-yl)-4,4,5,5-tetramethyl-1,3,2-dioxaborolane (Compound 24) and (*E*)-(4-chlorobut-2-en-2-yl)benzene. <sup>1</sup>H NMR (500 MHz, CDCl<sub>3</sub>): δ 7.22-7.29 (4H, m), 7.17 (1H, dddd (app tt), *J* = 7.0 Hz, 7.0 Hz, 1.5 Hz, 1.5 Hz), 6.10 (1H, dd, *J* = 17.5 Hz, 11.5 Hz), 5.68 (1H, ddd, *J* = 18.0 Hz, 11.0 Hz, 7.0 Hz), 5.15 (1H, dd, *J* = 10.5 Hz, 1.5 Hz), 4.96-5.03 (3H, m), 2.66 (1H, ddddd (app dqt), *J* = 7.0 Hz, 7.0 Hz, 7.0 Hz, 7.0 Hz, 1.5 Hz, 1.5 Hz), 1.29 (3H, s), 0.80 (3H, d, *J* = 7.0 Hz); <sup>13</sup>C NMR (125 MHz, CDCl<sub>3</sub>): δ 145.1, 140.9, 128.0, 128.0, 126.9, 126.9, 126.7, 125.7, 114.8, 113.2, 45.7, 38.1, 21.1, 14.5; IR (neat): 3082 (w), 3060 (w), 3021 (w), 2975 (w), 2931 (m), 2877 (w), 1636 (w), 1600 (w), 1493 (w), 1445 (w), 1413 (w), 1374 (w), 1079 (w), 1030 (w), 1000 (w), 912 (s), 761 (w), 732 (m), 699 (s), 542 (w) cm<sup>-1</sup>; HRMS-(ESI+) for C<sub>14</sub>H<sub>19</sub> [M+H]: calculated: 187.1487, found: 187.1491. [α]<sub>D</sub><sup>22</sup> = + 63.841 (*c* = 0.775, CHCl<sub>3</sub>). The crude reaction mixture was purified on silica gel (pentane) to afford a clear, colorless oil (27.5 mg, 74% yield). *R*<sub>f</sub> = 0.73 (pentane, stain in KMnO<sub>4</sub>).

**Analysis of Stereochemistry:**

The enantiomer ratio was determined by GLC analysis of the title compound as compared to the analogous racemic material, prepared using 1,2-bis(diphenylphosphino)benzene as the ligand in the allyl-allyl coupling reaction. The absolute stereochemistry was assigned by analogy to compounds **3a** and **31**.

Chiral GLC ( $\beta$ -dex, Supelco, 40 °C for 10 min, ramp 1 °C/min to 90 °C for 60 min, 20 psi) - analysis of title compound.

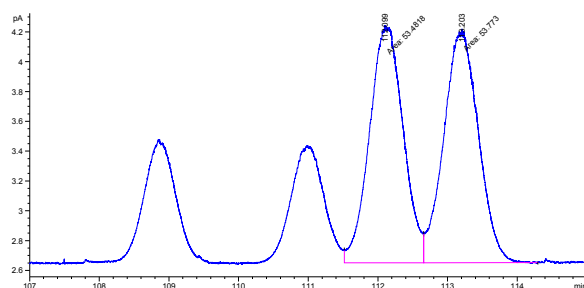

*Racemic Sample*

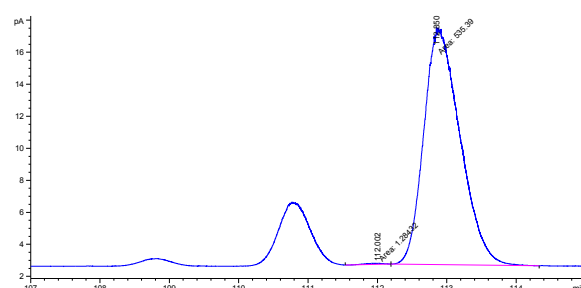

*Enantioenriched Sample*

| Peak # | RetTime [min] | Type | Width [min] | Area [pA*s] | Height [pA] | Area %   |
|--------|---------------|------|-------------|-------------|-------------|----------|
| 1      | 112.002       | MM   | 0.3373      | 1.28432     | 6.34539e-2  | 0.23931  |
| 2      | 112.850       | MM   | 0.6032      | 535.39044   | 14.79390    | 99.76069 |

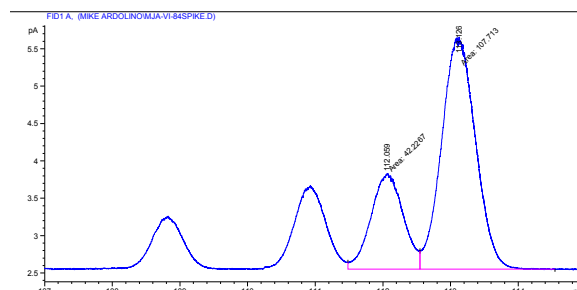

*Co-Injection of Racemic and Enantioenriched Samples*

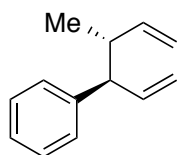

literature.<sup>2</sup>

**((3R,4R)-4-methylhexa-1,5-dien-3-yl)benzene (Compound 31).** The title compound was prepared *via* representative procedure **A** for allyl-allyl coupling with 2-(but-3-en-2-yl)-4,4,5,5-tetramethyl-1,3,2-dioxaborolane (Compound 24) and *tert*-butyl cinnamyl carbonate. The crude reaction mixture was purified on silica gel (pentane) to afford a clear, colorless oil (95.7 mg, 90% yield).  $R_f = 0.45$  (pentane, stain in  $\text{KMnO}_4$ ). Spectral data is in accordance with the

**Analysis of Stereochemistry:**

The enantiomer ratio was determined by GLC analysis of the title compound as compared to the analogous racemic material, prepared using 1,2-bis(diphenylphosphino)benzene as the ligand in the allyl-allyl coupling reaction. The absolute stereochemistry has been previously proven.<sup>2</sup>

*Chiral GLC (CD-BDM, Supelco, 50 °C for 10 min, ramp 1 °C/min to 110 °C for 20 min, 20 psi) - analysis of title compound.*

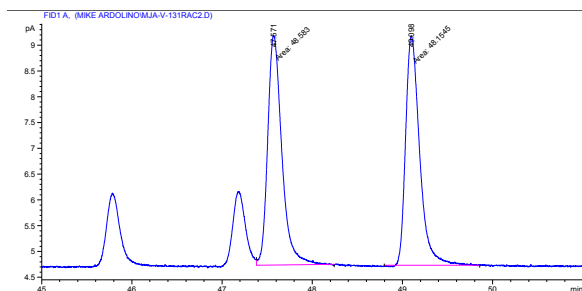

*Racemic Sample*

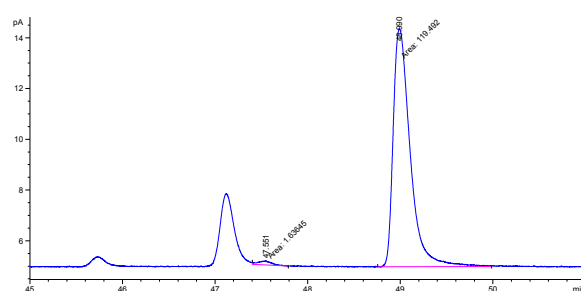

*Enantioenriched Sample*

| Peak # | RetTime [min] | Type | Width [min] | Area [pA*s] | Height [pA] | Area %   |
|--------|---------------|------|-------------|-------------|-------------|----------|
| 1      | 47.551        | FM   | 0.1619      | 1.63645     | 1.68470e-1  | 1.35101  |
| 2      | 48.990        | MF   | 0.2125      | 119.49178   | 9.37170     | 98.64899 |

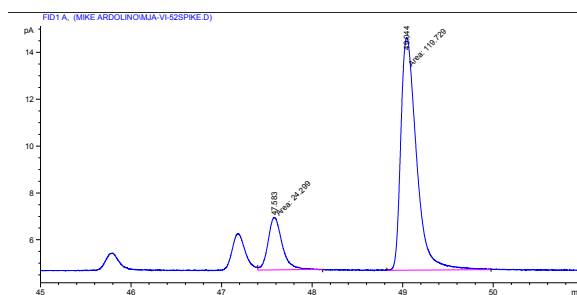

*Co-Injection of Racemic and Enantioenriched Samples*

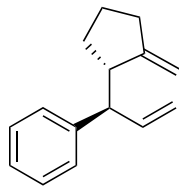

**((R)-1-((S)-2-methylenecyclopentyl)allyl)benzene (Compound 37).** The title compound was prepared *via* representative procedure **D** for allyl-allyl coupling with 4,4,5,5-tetramethyl-2-(2-methylenecyclopentyl)-1,3,2-dioxaborolane and cinnamyl chloride with the following modification: the reaction was run for 24 hours.  $^1\text{H}$  NMR (500 MHz,  $\text{CDCl}_3$ ):  $\delta$  7.29 (2H, dddd (app tt),  $J = 7.5$  Hz, 7.5 Hz, 1.5 Hz, 1.5 Hz), 7.19 (3H, dd (app t),  $J = 7.5$  Hz, 7.5 Hz), 6.11 (1H, ddd (app dt),  $J = 17.5$  Hz, 9.5 Hz, 9.5 Hz), 5.07 (1H, ddd (app dt),  $J = 10.5$  Hz, 1.5 Hz, 1.5 Hz), 5.00 (1H, ddd (app dt),  $J = 17.5$  Hz, 1.5 Hz, 1.5 Hz), 4.96 (1H, s (br)), 4.91 (1H, s (br)), 3.28 (1H, dd (app t),  $J = 8.5$  Hz, 8.5 Hz), 2.79-2.84 (1H, m), 2.18-2.34 (2H, m), 1.56-1.66 (2H, m), 1.45-1.54 (1H, m), 1.30-1.37 (1H, m);  $^{13}\text{C}$  NMR (125 MHz,  $\text{CDCl}_3$ ):  $\delta$  154.1, 143.6, 141.4, 128.3, 128.3, 128.2, 128.2, 126.0, 115.0, 107.2, 53.6, 48.3, 33.5, 31.0, 23.7; IR (neat): 3078 (w), 3027 (w), 2954 (m), 2868 (w), 1650 (w), 1638 (w), 1600 (w), 1492 (w), 1451 (w), 1434 (w), 1414 (w), 991 (w), 912 (m), 883 (m), 755 (m), 699 (s), 673 (w), 523 (w)  $\text{cm}^{-1}$ ; HRMS-(ESI+) for  $\text{C}_{15}\text{H}_{19}$  [M+H]: calculated: 199.1487, found: 199.1485.  $[\alpha]_D^{25} = -46.251$  ( $c = 0.92$ ,  $\text{CHCl}_3$ ). The crude reaction mixture was purified on silica gel (pentane) to afford a clear, colorless oil (38.0 mg, 96% yield).  $R_f = 0.69$  (pentane, stain in  $\text{KMnO}_4$ ).

### Analysis of Stereochemistry:

The enantiomer ratio was determined by GLC analysis of the title compound as compared to the analogous racemic material, prepared using 1,2-bis(diphenylphosphino)benzene as the ligand in the allyl-allyl coupling reaction. The absolute stereochemistry was assigned by analogy to compounds **3a** and **38**.

Chiral GLC ( $\beta$ -dex, Supelco, 50 °C for 10 min, ramp 1 °C/min to 140 °C for 30 min, 20 psi) - analysis of title compound.

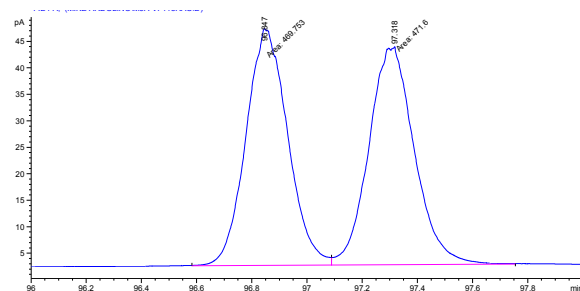

Racemic Sample

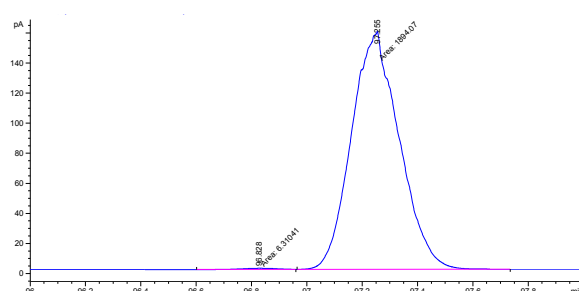

Enantioenriched Sample

| Peak # | RetTime [min] | Type | Width [min] | Area [pA*s] | Height [pA] | Area %   |
|--------|---------------|------|-------------|-------------|-------------|----------|
| 1      | 96.828        | MM   | 0.1386      | 6.31041     | 7.58823e-1  | 0.33206  |
| 2      | 97.255        | MM   | 0.1994      | 1894.06775  | 158.30048   | 99.66794 |

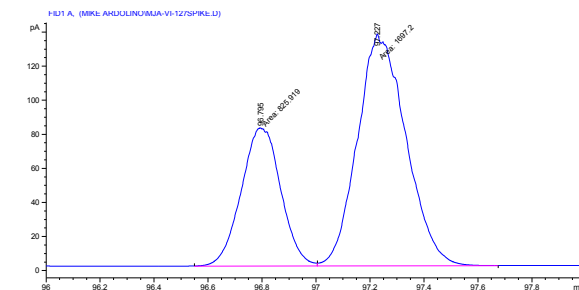

### Co-Injection of Racemic and Enantioenriched Samples

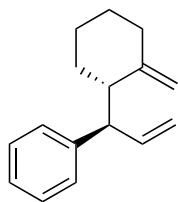

**((R)-1-((S)-2-methylenecyclohexyl)allyl)benzene (Compound 38).** The title compound was prepared *via* representative procedure **D** for allyl-allyl coupling with 4,4,5,5-tetramethyl-2-(2-methylenecyclohexyl)-1,3,2-dioxaborolane and cinnamyl chloride with the following modification: the reaction was run for 24 hours on a 0.5 mmol scale.  $^1\text{H}$  NMR (500 MHz,  $\text{CDCl}_3$ ):  $\delta$  7.31 (2H, dd (app t),  $J = 7.5$  Hz, 7.5 Hz), 7.21 (3H, dd (app t),  $J = 7.5$  Hz, 7.5 Hz), 5.95 (1H, ddd,  $J = 17.0$  Hz, 10.0 Hz, 8.5 Hz), 4.94 (1H, dd,  $J = 10.5$  Hz, 1.5 Hz), 4.89 (1H, dd,  $J = 17.0$  Hz, 1.0 Hz), 4.77 (1H, s (br)), 4.73 (1H, d,  $J = 2.5$  Hz), 3.53 (1H, dd,  $J = 11.5$  Hz, 8.5 Hz), 2.56 (1H, ddd (app dt),  $J = 11.5$  Hz, 4.5 Hz, 4.5 Hz), 2.16-2.19 (2H, m), 1.75-1.80 (1H, m), 1.56-1.65 (1H, m), 1.37-1.46 (2H, m), 1.33 (2H, dddd (app p),  $J = 4.0$  Hz, 4.0 Hz, 4.0 Hz, 4.0 Hz);  $^{13}\text{C}$  NMR (125 MHz,  $\text{CDCl}_3$ ):  $\delta$  150.7, 143.7, 141.7, 128.5, 128.5, 128.1, 128.1, 126.2, 114.0, 108.8, 50.1, 48.4, 32.7, 30.1, 28.6, 21.6; IR (neat): 3065 (w), 3027 (w), 2977 (w), 2929 (s), 2855 (m), 1646 (w), 1600 (w), 1492 (w), 1448 (w), 1410 (m), 1070 (w), 986 (w), 909 (w), 888 (m), 857 (m), 779 (w), 750 (m), 699 (s), 674 (w), 577 (w), 521 (w)  $\text{cm}^{-1}$ ; HRMS-(ESI+) for  $\text{C}_{16}\text{H}_{21}$   $[\text{M}+\text{H}]^+$ : calculated: 213.1643, found: 213.1651.  $[\alpha]_D^{22} = +60.601$  ( $c = 1.55$ ,  $\text{CHCl}_3$ ). The crude reaction mixture was purified on silica gel (pentane) to afford a clear, colorless oil (100.0 mg, 94% yield).  $R_f = 0.63$  (pentane, stain in  $\text{KMnO}_4$ ).

#### Analysis of Stereochemistry:

The enantiomer ratio was determined by GLC analysis of the title compound as compared to the analogous racemic material, prepared using 1,2-bis(diphenylphosphino)benzene as the ligand in the allyl-allyl coupling reaction. The relative stereochemistry was assigned as shown below. The absolute stereochemistry was assigned by analogy to compound **3a**.

Chiral GLC ( $\beta$ -dex, Supelco, 50 °C for 10 min, ramp 0.5 °C/min to 120 °C for 40 min, 20 psi) - analysis of title compound.

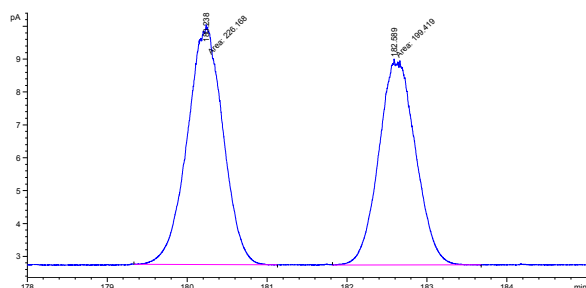

*Racemic Sample*

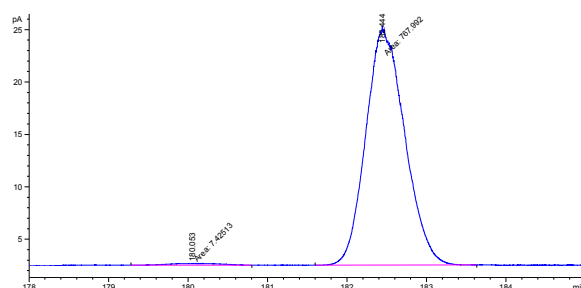

*Enantioenriched Sample*

| Peak # | RetTime [min] | Type | Width [min] | Area [pA*s] | Height [pA] | Area %   |
|--------|---------------|------|-------------|-------------|-------------|----------|
| 1      | 180.053       | MM   | 0.7482      | 7.42513     | 1.65393e-1  | 0.95757  |
| 2      | 182.444       | MM   | 0.5607      | 767.99182   | 22.82834    | 99.04243 |

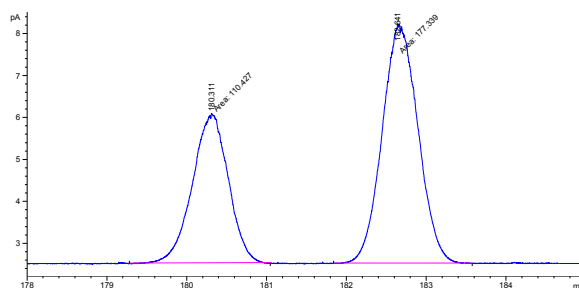

*Co-Injection of Racemic and Enantioenriched Samples*

### **Proof of Relative Stereochemistry**

The title compound was subjected to ozonolysis/reduction as shown below. A crystal structure of the resulting diol was obtained, which showed an *anti*-relationship between the phenyl group and the unsubstituted methylene unit of the cyclohexane as shown.

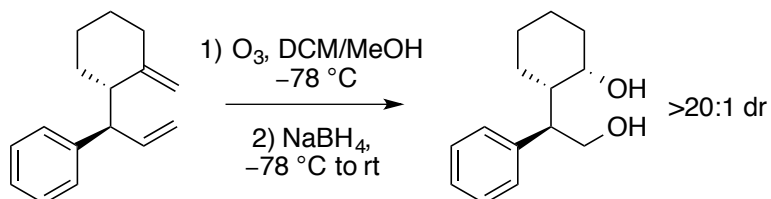



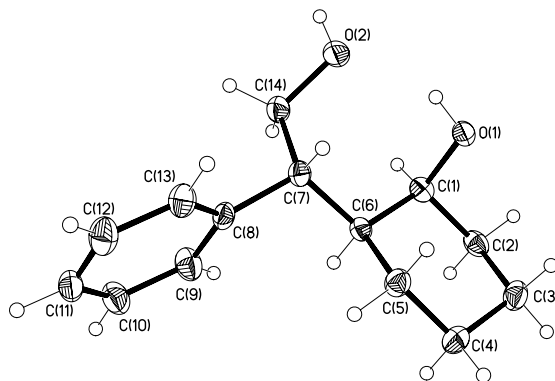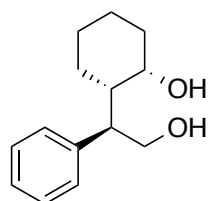

**(1S,2S)-2-((R)-2-hydroxy-1-phenylethyl)cyclohexan-1-ol (Compound SI-9).**

$^1\text{H}$  NMR (500 MHz,  $\text{CDCl}_3$ ):  $\delta$  7.31 (2H, dd (app t),  $J = 8.0$  Hz, 8.0 Hz), 7.22 (1H, dddd, app tt),  $J = 7.0$  Hz, 7.0 Hz, 1.5 Hz, 1.5 Hz), 7.18-7.19 (2H, m), 4.26 (1H, s (br)), 4.00 (1H, dd,  $J = 11.0$  Hz, 7.0 Hz), 3.81 (1H, dd,  $J = 11.0$  Hz, 5.5 Hz), 2.77-2.82 (1H, m), 2.23 (2H, s (br)), 1.89-1.93 (1H, s), 1.69-1.75 (1H, m), 1.43-1.65 (4H, m), 1.26-1.35 (1H, m), 1.08-1.17 (2H, m);  $^{13}\text{C}$  NMR (125 MHz,  $\text{CDCl}_3$ ):  $\delta$  142.6, 128.6, 128.6, 128.3, 128.3, 126.6, 67.0, 65.6, 50.7, 45.0, 33.4, 25.8, 25.6, 20.1; IR (neat): 3342 (m, br), 3083 (w), 3061 (w), 3026 (w), 2927 (s), 2855 (m), 2363 (w), 1601 (w), 1493 (w), 1449 (m), 1074 (w), 1002 (m), 968 (m), 910 (w), 885 (w), 756 (m), 701 (s), 669 (w)  $\text{cm}^{-1}$ ; HRMS-(ESI+) for  $\text{C}_{14}\text{H}_{21}\text{O}_2$  [ $\text{M}+\text{H}$ ]: calculated: 221.1542, found: 221.1550.  $[\alpha]_D^{25} = +10.258$  ( $c = 1.31$ ,  $\text{CHCl}_3$ ). The crude reaction mixture was purified on silica gel (2:1 diethyl ether:pentane) to afford a clear, colorless oil (26.2 mg, 25% yield).  $R_f = 0.14$  (2:1 diethyl ether: pentane, stain in  $\text{KMnO}_4$ ).

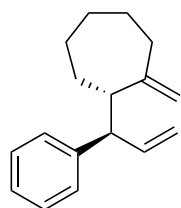

**(S)-1-methylene-2-((R)-1-phenylallyl)cycloheptane (Compound 39).**

The title compound was prepared *via* representative procedure **D** for allyl-allyl coupling with 4,4,5,5-tetramethyl-2-(2-methylenecycloheptyl)-1,3,2-dioxaborolane and cinnamyl chloride with the following modification: the reaction was run for 24 hours.  $^1\text{H}$  NMR (500 MHz,  $\text{CDCl}_3$ ):  $\delta$  7.30 (2H, dd (app t),  $J = 8.0$  Hz, 8.0 Hz), 7.18-7.21 (3H, m), 5.99 (1H, ddd,  $J = 17.0$  Hz, 10.0 Hz, 8.0 Hz), 4.94 (1H, ddd (app dt),  $J = 10.0$  Hz, 1.0 Hz, 1.0 Hz), 4.91 (1H, d,  $J = 2.0$  Hz), 4.84 (1H, ddd,  $J = 17.0$  Hz, 2.0 Hz, 1.0 Hz), 4.73 (1H, d,  $J = 1.5$  Hz), 3.16 (1H, dd (app t),  $J = 9.0$  Hz, 9.0 Hz), 2.63 (1H, ddd (app dt),  $J = 10.5$  Hz, 10.5 Hz, 6.0 Hz), 2.23 (1H, ddd (app dt),  $J = 10.0$  Hz, 5.0 Hz, 5.0 Hz), 1.95 (ddd (app dt)),  $J = 12.0$  Hz, 12.0 Hz, 3.5 Hz), 1.81-1.84 (1H, m), 1.70-1.73 (1H, m), 1.51-1.60 (2H, m), 1.29-1.38 (1H, m), 1.15-1.27 (2H, m), 1.02-1.10 (1H, m);  $^{13}\text{C}$  NMR (125 MHz,  $\text{CDCl}_3$ ):  $\delta$  152.3, 143.5, 141.7, 128.3, 128.3, 128.2, 128.2, 126.1, 114.3, 114.1, 55.5, 51.7, 33.0, 32.4, 31.4, 30.5, 25.9; IR (neat): 3064 (w), 3027 (w), 2976 (w), 2923 (s), 2852 (m), 1638 (w), 1601 (w), 1493 (w), 1450 (m), 1414 (w), 986 (w), 908 (m), 893 (m), 883 (m), 852 (w), 826 (w), 763 (w), 728 (w), 699 (w), 677 (w), 527 (w)  $\text{cm}^{-1}$ ; HRMS-(ESI+)

for C<sub>17</sub>H<sub>23</sub> [M+H]: calculated: 227.1800, found: 227.1800. [α]<sub>D</sub><sup>22</sup> = + 11.520 (c = 1.16, CHCl<sub>3</sub>). The crude reaction mixture was purified on silica gel (pentane) to afford a clear, colorless oil (43.4 mg, 96% yield). R<sub>f</sub> = 0.61 (pentane, stain in KMnO<sub>4</sub>).

**Analysis of Stereochemistry:**

The enantiomer ratio was determined by GLC analysis of the title compound as compared to the analogous racemic material, prepared using 1,2-bis(diphenylphosphino)benzene as the ligand in the allyl-allyl coupling reaction. The absolute stereochemistry was assigned by analogy to compounds **3a** and **38**.

Chiral GLC (β-dex, Supelco, 50 °C for 10 min, ramp 1 °C/min to 140 °C for 90 min, 20 psi) - analysis of title compound.

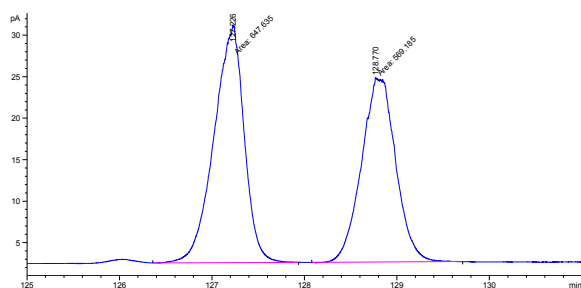

*Racemic Sample*

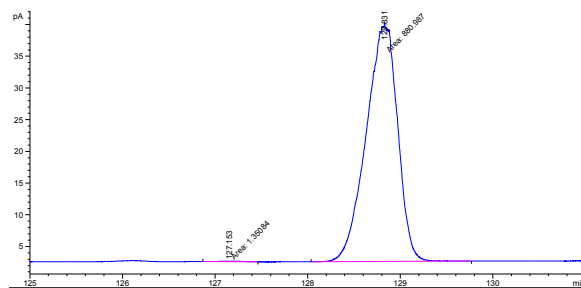

*Enantioenriched Sample*

| Peak # | RetTime [min] | Type | Width [min] | Area [pA*s] | Height [pA] | Area %   |
|--------|---------------|------|-------------|-------------|-------------|----------|
| 1      | 127.153       | MM   | 0.2721      | 1.35084     | 8.27535e-2  | 0.15310  |
| 2      | 128.831       | MM   | 0.3903      | 880.98737   | 37.62112    | 99.84690 |

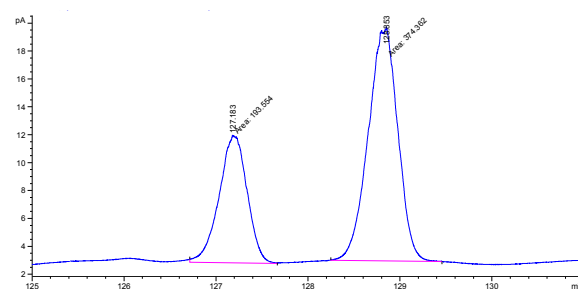

*Co-Injection of Racemic and Enantioenriched Samples*

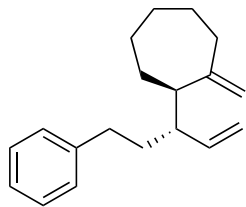

**(R)-1-methylene-2-((S)-5-phenylpent-1-en-3-yl)cycloheptane (Compound 40).**

The title compound was prepared *via* representative procedure **C** for allyl-allyl coupling with 4,4,5,5-tetramethyl-2-(2-methylenecycloheptyl)-1,3,2-dioxaborolane and (E)-(5-chloropent-3-en-1-yl)benzene. The reaction was run with the following modifications: the reaction was run for 24 hours with 1 mol% [(S,S)-2,3-bis(tert-butylmethylphosphino)quinoxaline]palladium(II) dichloride as the catalyst

and 10 equivalents of CsF. <sup>1</sup>H NMR (500 MHz, CDCl<sub>3</sub>): δ 7.27 (2H, dd (app t), *J* = 7.5 Hz, 7.5 Hz), 7.16-7.19 (3H, m), 5.52 (1H, ddd (app dt), *J* = 17.0 Hz, 10.5 Hz, 10.5 Hz), 5.05 (1H, dd, *J* = 10.5 Hz, 2.5 Hz), 4.96 (1H, dd, *J* = 17.5 Hz, 2.0 Hz), 4.85 (1H, d, *J* = 2.5 Hz), 4.68 (1H, d, *J* = 2.0 Hz), 2.62-2.69 (1H, m), 2.47 (1H, ddd, *J* = 14.0 Hz, 10.5 Hz, 6.5 Hz), 2.30 (1H, ddd (app dt), *J* = 10.5 Hz, 5.5 Hz, 5.5 Hz), 2.17-2.22 (1H, m), 1.98 (1H, dddd (app tt), *J* = 9.5 Hz, 9.5 Hz, 4.5 Hz, 4.5 Hz), 1.68-1.91 (6H, m), 1.56-1.65 (1H, m), 1.33-1.40 (1H, m), 1.17-1.23 (3H, m); <sup>13</sup>C NMR (125 MHz, CDCl<sub>3</sub>): δ 253.2, 143.0, 141.2, 128.4, 128.4, 128.2, 128.2, 125.5, 115.4, 113.6, 50.7, 49.9, 34.5, 34.3, 33.9, 32.4, 31.5, 31.1, 26.3; IR (neat): 3065 (w), 3026 (w), 2975 (w), 2921 (s), 2852 (m), 1637 (w), 1604 (w), 1495 (w), 1452 (w), 1420 (w), 1004 (w), 911 (m), 893 (m), 793 (w), 747 (w), 698 (s) cm<sup>-1</sup>; HRMS-(ESI+) for C<sub>19</sub>H<sub>27</sub> [M+H]: calculated: 255.2113, found: 255.2102. [α]<sup>22</sup><sub>D</sub> = + 76.855 (*c* = 0.93, CHCl<sub>3</sub>). The crude reaction mixture was purified on silica gel (pentane) to afford a clear, colorless oil (41.7 mg, 82% yield). *R*<sub>f</sub> = 0.75 (pentane, stain in KMnO<sub>4</sub>).

**Analysis of Stereochemistry:**

The enantiomer ratio was determined by GLC analysis of the title compound as compared to the analogous racemic material, prepared using 1,2-bis(diphenylphosphino)benzene as the ligand in the allyl-allyl coupling reaction. The absolute stereochemistry was assigned by analogy to compounds **3a** and **40**. In related diastereoselective allyl-allyl couplings, (*R,R*)-QuinoxP\* is known to give the same absolute stereochemistry as (*R*)-Methoxy(furyl)BIPHEP, therefore the catalyst derived from the (*S,S*)-QuinoxP\* ligand should give the opposite enantiomer as with the (*R*)-Methoxy(furyl)BIPHEP.<sup>2</sup>

Ardolino & Morken, Supporting Information

Chiral GLC ( $\beta$ -dex, Supelco, 50 °C for 10 min, ramp 1 °C/min to 120 °C for 10 min, then ramp 0.25 °C/min to 160 °C for 10 min, 20 psi) - analysis of title compound.

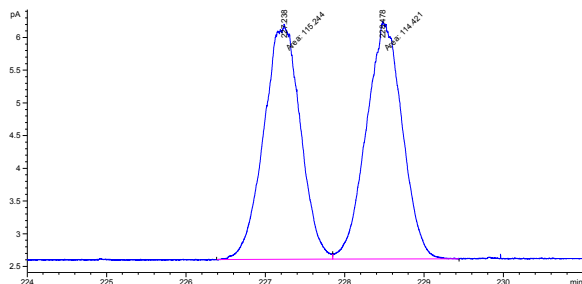

*Racemic Sample*

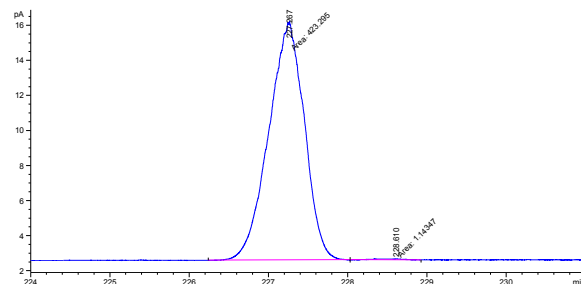

*Enantioenriched Sample*

| Peak # | RetTime [min] | Type | Width [min] | Area [pA*s] | Height [pA] | Area %   |
|--------|---------------|------|-------------|-------------|-------------|----------|
| 1      | 227.267       | MM   | 0.5191      | 423.29474   | 13.59040    | 99.73059 |
| 2      | 228.610       | MM   | 0.3587      | 1.14347     | 5.31343e-2  | 0.26941  |

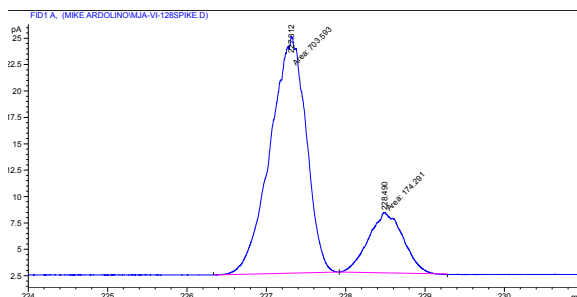

*Co-Injection of Racemic and Enantioenriched Samples*

## Calorimeter Experiments

### Representative Procedure for Allyl-Allyl Couplings in Calorimetry Study

*Sample Vial:* An oven-dried calorimeter vial equipped with a magnetic stir bar was charged successively with (*R*)-**4** (0.6 mg, 0.8  $\mu$ mol), THF (1.4 mL), allylB(pin) (161.4 mg, 0.96 mmol), and cesium fluoride (6.1 mg, 0.04 mmol) in a dry-box under argon atmosphere.

*Reference Vial:* An oven-dried calorimeter vial equipped with a magnetic stir bar was charged successively with THF (1.4 mL), allylB(pin) (161.4 mg, 0.96 mmol), and cesium fluoride (6.1 mg, 0.04 mmol) in a dry-box under argon atmosphere.

Both vials were sealed with a teflon-lined silicon septum cap and electrical tape and removed from the dry-box. The vials were placed in an Omnical SuperCRC calorimeter with vigorous stirring (450-480 rpm). A solution of *tert*-butyl cinnamyl carbonate (187.4 mg, 0.8 mmol) in dry THF (0.2 mL) was prepared under nitrogen and taken up in a 500  $\mu$ L syringe which was placed in the sample syringe inlet and pushed through the septum of the sample vial but not injected. A second solution of *tert*-butyl cinnamyl carbonate (187.4 mg, 0.8 mmol) in dry THF (0.2 mL) was prepared under nitrogen and taken up in a 500  $\mu$ L syringe, which was placed in the reference syringe inlet and pushed through the septum of the reference vial but not injected. The system was then warmed to 60  $^{\circ}$ C and allowed to stand for 30-60 minutes until thermal equilibrium was achieved. The reaction was then initiated by addition of the contents of both syringes simultaneously and rapidly to each vial. The microsyringes were not removed from the vials, and the top of the calorimeter was covered to fully insulate the system. The reaction was allowed to run without disturbance until the reaction showed no further heat output. After the reaction was complete, the instrument was re-equilibrated and a correction factor to account for the heat flow lag of the instrument was performed. The reaction vials were removed from the calorimeter, cooled, and the reaction mixture was analyzed to confirm full conversion of the reaction vial and no conversion in the reference vial. The data from the calorimeter was then analyzed using Microsoft Excel.

## Deuterium Labeling Studies

Preparation of (*R,Z*)-oct-1-en-1-D-3-ol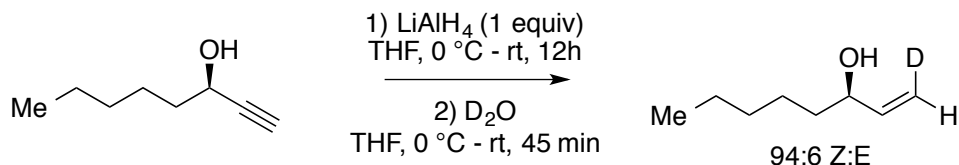

From commercially available (*R*)-1-octyn-3-ol, the literature procedure was followed on a 6.0 mmol scale.<sup>15</sup> The crude reaction mixture was purified on silica gel (4:1 pentane:diethyl ether) to afford a clear, colorless oil (691 mg, 89% yield). The product was contaminated with 25% of deuterated alkyne which was inseparable; however this was removed in the subsequent step.  $R_f = 0.33$  (4:1 pentane:diethyl ether, stain in KMnO<sub>4</sub>).

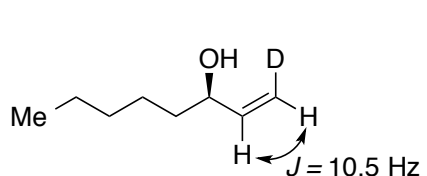**(*R,Z*)-oct-1-en-1-D-3-ol (Compound SI-10).**

<sup>1</sup>H NMR (500 MHz, CDCl<sub>3</sub>):  $\delta$  5.86 (1H, dddd (app ddt),  $J = 11.0\text{Hz}, 10.5 \text{ Hz}, 2.5 \text{ Hz}, 2.5 \text{ Hz}$ ), 5.08 (1H, dd,  $J = 10.5 \text{ Hz}, 1.5 \text{ Hz}$ ), 4.10 (1H, ddd (app dt),  $J = 11.0 \text{ Hz}, 7.0 \text{ Hz}, 7.0 \text{ Hz}$ ), 1.45-1.56 (2H, m), 1.27-1.37 (6H, m), 0.89 (3H, dd (app t),  $J = 7.0 \text{ Hz}, 7.0 \text{ Hz}$ ); <sup>13</sup>C NMR (125 MHz, CDCl<sub>3</sub>):  $\delta$  141.2, 114.2 (t), 73.2, 37.0, 31.7, 25.0, 22.6, 14.0.; IR (neat): 3366 (m, br), 2957 (m), 2931 (s), 2860 (m), 1521 (m), 1058 (w), 1029 (w), 809 (w) 669 (w) cm<sup>-1</sup>; HRMS-(ESI+) for C<sub>8</sub>H<sub>14</sub>D<sub>1</sub> [M+H-H<sub>2</sub>O]: calculated:112.1237, found:112.1241.  $[\alpha]_D^{25} = -2.480$  ( $c = 1.50$ , CHCl<sub>3</sub>).

Preparation of (*R,Z*)-oct-1-en-3-yl-1-D acetate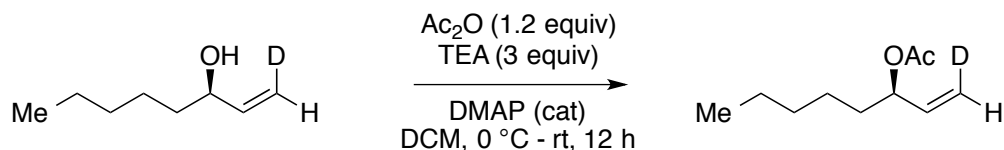

An oven-dried round-bottomed flask equipped with a magnetic stir bar was charged with dichloromethane (30.0 mL), (*R,Z*)-oct-1-en-1-d-3-ol (473.2 mg, 3.7 mmol), and 4-dimethylamino pyridine (catalytic) under a nitrogen atmosphere. The solution was cooled to 0 °C and triethylamine (1.58 mL, 11.0 mmol) was added, followed by dropwise addition of acetic anhydride (0.42 mL, 4.4 mmol). The solution was gradually warmed to room temperature and stirred for 12 h. The reaction was concentrated *in vacuo*, and the crude reaction mixture was purified on silica gel (10:1 pentane:diethyl ether) to afford a clear, colorless oil (546 mg, 94% yield).  $R_f = 0.77$  (10:1 pentane:diethyl ether, stain in KMnO<sub>4</sub>).

<sup>15</sup> Casey, C. P.; Strotman, N. A. *J. Am. Chem. Soc.* **2004**, *126*, 1699.

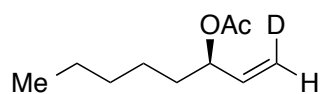**(*R,Z*)-oct-1-en-3-yl-1-D acetate (Compound SI-11).**

$^1\text{H}$  NMR (500 MHz,  $\text{CDCl}_3$ ):  $\delta$  5.74-5.78 (1H, m), 5.22 (1H, ddd (app q),  $J = 7.0$  Hz, 7.0 Hz, 7.0 Hz), 5.14 (1H, dd,  $J = 10.5$  Hz, 1.5 Hz), 2.06 (3H, s), 1.51-1.67 (2H, m), 1.26-1.34 (6H, m), 0.88 (3H, dd (app t),  $J = 7.0$  Hz, 7.0 Hz);  $^{13}\text{C}$  NMR (125 MHz,  $\text{CDCl}_3$ ):  $\delta$  170.4, 136.6, 116.2 (t), 74.8, 34.1, 31.5, 24.7, 22.5, 21.2, 14.0; IR (neat): 2360 (s), 2342 (s), 1771 (m), 1734 (w), 1717 (w), 1699 (w), 1489 (w), 1473 (w), 1456 (w), 1436 (w), 1396 (w), 1387 (w), 1374 (w), 1363 (w), 669 (m),  $\text{cm}^{-1}$ ; HRMS-(ESI+) for  $\text{C}_{10}\text{H}_{16}\text{D}_1\text{O}_2$  [ $\text{M}+\text{H}$ ]: calculated: 170.1291, found: 170.1299.  $[\alpha]^{22}_{\text{D}} = + 13.936$  ( $c = 0.80$ ,  $\text{CHCl}_3$ ).

**Preparation of (*S,E*)-4,4,5,5-tetramethyl-2-(oct-2-en-1-yl-1-D)-1,3,2-dioxaborolane**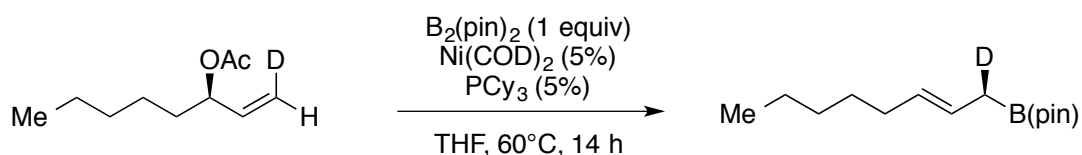

An oven-dried scintillation vial equipped with a magnetic stir bar was charged with  $\text{Ni}(\text{COD})_2$  (41.3 mg, 0.15 mmol),  $\text{PCy}_3$  (42.1 mg, 0.15 mmol), bis(pinacolato)diboron (762.6 mg, 3.00 mmol), and tetrahydrofuran (3.0 mL) in a dry-box under an argon atmosphere. The vial was capped and stirred for two minutes, then (*R,Z*)-oct-1-en-3-yl-1-d acetate (510.4 mg, 3.00 mmol) was added. The vial was capped with a teflon cone-lined cap, sealed with electrical tape, removed from the dry-box, heated to 60 °C and allowed to stir for 14 h. The reaction was then cooled and concentrated *in vacuo*, and the crude reaction mixture was purified rapidly on oven-dried silica gel (fast gradient of 40:1-20:1 pentane:diethyl ether) to afford a clear, colorless oil (608 mg, 88% yield).  $R_f = 0.72$  (10:1 pentane:diethyl ether, stain in  $\text{KMnO}_4$ ).

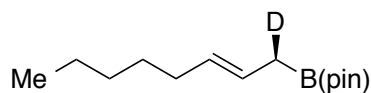**(*S,E*)-4,4,5,5-tetramethyl-2-(oct-2-en-1-yl-1-D)-1,3,2-dioxaborolane (Compound (*S*)-E-7).**

$^1\text{H}$  NMR (500 MHz,  $\text{CDCl}_3$ ):  $\delta$  5.35-5.45 (2H, m), 1.96 (2H, ddd (app q),  $J = 7.5$  Hz, 7.5 Hz, 7.5 Hz), 1.61 (1H, d (br),  $J = 6.5$  Hz), 1.24-1.37 (6H, m), 1.24 (12 H, s), 0.87 (3H, dd (app t),  $J = 7.0$  Hz, 7.0 Hz);  $^{13}\text{C}$  NMR (125 MHz,  $\text{CDCl}_3$ ):  $\delta$  131.1, 128.6, 83.1, 83.1, 32.7, 31.4, 29.3, 24.8, 24.8, 24.8, 22.6, 14.1; IR (neat): 2978 (w), 2958 (w), 2926 (m), 2856 (w), 1466 (w), 1370 (m), 1347 (s), 1320 (s), 1272 (w), 1215 (w), 1145 (s), 1110 (w), 968 (m), 862 (w), 672 (w)  $\text{cm}^{-1}$ ; HRMS-(ESI+) for  $\text{C}_{14}\text{H}_{27}\text{D}_1\text{B}_1\text{O}_2$  [ $\text{M}+\text{H}$ ]: calculated: 240.2245, found: 240.2241.  $[\alpha]^{22}_{\text{D}} = + 0.658$  ( $c = 0.73$ ,  $\text{CHCl}_3$ ).

**Allyl-Allyl Coupling to give ((3*R*,4*R*)-4-((*E*)-vinyl-2-*D*)non-1-en-3-yl)benzene (Compound (*R,R*)-*E*-8).**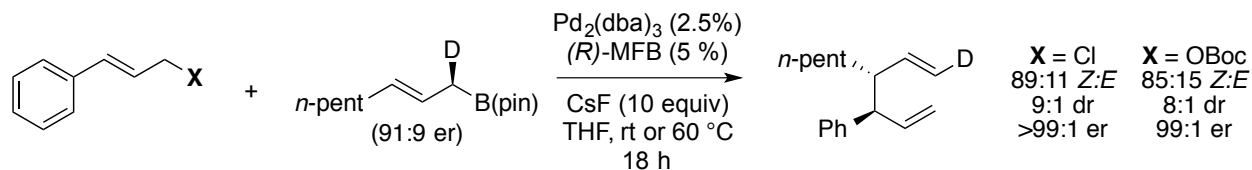

An oven-dried two-dram vial equipped with a magnetic stir bar was charged successively with  $\text{Pd}_2(\text{dba})_3$  (2.29 mg, 2.5  $\mu\text{mol}$ ), (*R*)-(+)-2,2'-bis(di-2-furanylphosphino)-6,6'-dimethoxy-1,1'-biphenyl [(*R*)-MFB] (2.71 mg, 5.0  $\mu\text{mol}$ ), and THF (0.2 mL) in a dry-box under an argon atmosphere. The vial was capped and allowed to stir for five minutes, then cinnamyl chloride (15.2 mg, 0.1 mmol) or *tert*-butyl cinnamyl carbonate (23.4 mg, 0.1 mmol) was added, followed by (*S,E*)-4,4,5,5-tetramethyl-2-(oct-2-en-1-yl-1-*d*)-1,3,2-dioxaborolane (28.6 mg, 0.12 mmol) and cesium fluoride (151.9 mg, 1.0 mmol). The vial was sealed, removed from the dry-box, and heated to room temperature (X=Cl) or 60 °C (X=OBoc) and stirred for 18 h. After this time, the reaction mixture was diluted with diethyl ether, filtered through a plug of silica gel and concentrated *in vacuo*. The crude reaction mixture was purified on silica gel (pentane) to afford a clear, colorless oil (19.2 mg, 85% yield when X=Cl, 10.8 mg, 48% yield when X=OBoc).  $R_f$  = 0.43 (pentane, stain in  $\text{KMnO}_4$ ).

**((3*R*,4*R*)-4-((*E*)-vinyl-2-*D*)non-1-en-3-yl)benzene (Compound (*R,R*)-*E*-8).**

$^1\text{H}$  NMR (500 MHz,  $\text{CDCl}_3$ ):  $\delta$  7.30 (2H, dd (app t),  $J$  = 7.5 Hz, 7.5 Hz), 7.17-7.22 (3H, m), 5.99 (1H, ddd,  $J$  = 17.0 Hz, 10.0 Hz, 8.0 Hz), 5.56 (1H, dd,  $J$  = 17.0 Hz, 8.5 Hz), 5.02 (1H, dd,  $J$  = 10.0 Hz, 2.5 Hz), 4.94 (1H, ddd,  $J$  = 17.0 Hz, 1.5 Hz, 1.5 Hz), 4.94 (1H, dd,  $J$  = 17.0 Hz, 1.5 Hz), 3.18 (1H, dd (app t),  $J$  = 8.5 Hz, 8.5 Hz), 2.34 (1H, dddd (app dtd),  $J$  = 8.5 Hz, 8.5 Hz, 8.5 Hz, 2.5 Hz), 1.09-1.32 (8H, m), 0.83 (3H, dd (app t),  $J$  = 7.0 Hz, 7.0 Hz);  $^{13}\text{C}$  NMR (125 MHz,  $\text{CDCl}_3$ ):  $\delta$  143.5, 140.9, 140.7, 128.3, 128.3, 128.1, 128.1, 126.1, 115.1, 55.0, 49.2, 32.3, 31.7, 26.9, 26.7, 22.6, 14.0; IR (neat): 3080 (w), 3063 (w), 3028 (w), 2956 (m), 2928 (s), 2857 (m), 1637 (w), 1620 (w), 1601 (w), 1494 (w), 1453 (w), 1378 (w), 982 (m), 913 (m), 806 (w), 757 (w) 700 (s), 678 (w)  $\text{cm}^{-1}$ ; HRMS-(ESI+) for  $\text{C}_{17}\text{H}_{24}\text{D}_1$  [ $\text{M}+\text{H}$ ]: calculated: 230.2019, found: 230.2013.  $[\alpha]_D^{22} = +32.954$  ( $c$  = 1.46,  $\text{CHCl}_3$ ).



**Analysis of Stereochemistry**

The title compound was subjected to ozonolysis and reduction to afford the 1,4-diol for SFC analysis as depicted below. The analogous racemic material was prepared *via* the same route, using 1,2-bis(diphenylphosphino)benzene as the ligand in the allyl-allyl coupling reaction. The absolute stereochemistry was assigned by analogy to compound **31**.

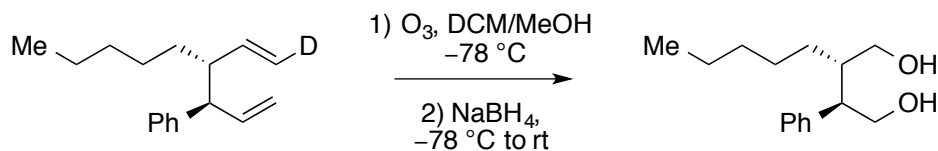

Chiral SFC (OJ-H, Chiralpak, 3 mL/min, 5.0% *i*-PrOH, 100 bar, 35 °C) - analysis of title compound.

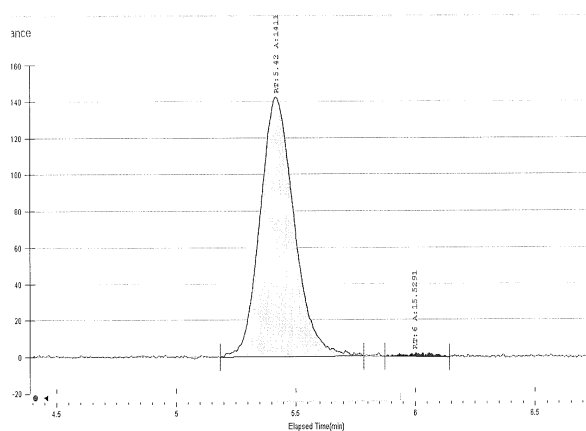

Enantioenriched Sample (X=OBoc)

| Peak No | % Area  | Area      | RT (min) |
|---------|---------|-----------|----------|
| 1       | 98.9119 | 1411.6026 | 5.42     |
| 2       | 1.0881  | 15.5291   | 6        |
| Total:  | 100     | 1427.1317 |          |

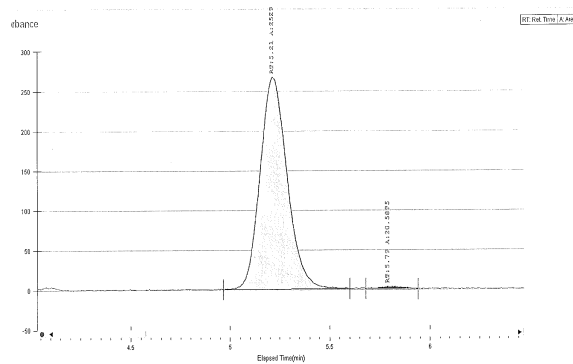

Enantioenriched Sample (X=Cl)

| Peak No | % Area  | Area      | RT (min) |
|---------|---------|-----------|----------|
| 1       | 99.1925 | 2529.1009 | 5.21     |
| 2       | 0.8075  | 20.5895   | 5.79     |
| Total:  | 100     | 2549.6904 |          |

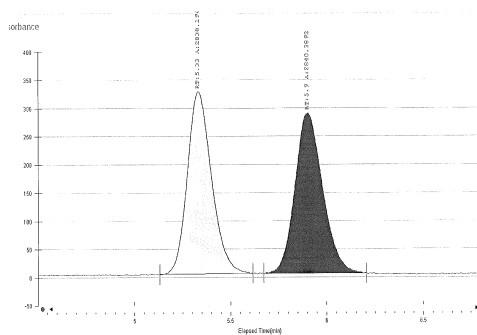

Racemic Sample

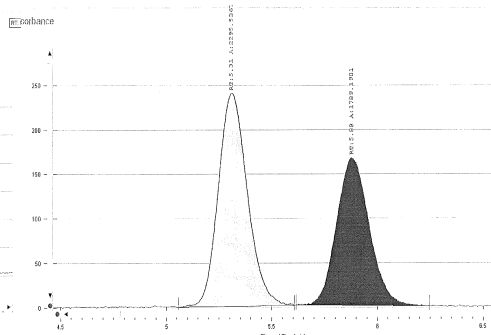

Co-Injection of Racemic and Enantioenriched Samples

## Additional Labeling Study Results

Reaction without CsF

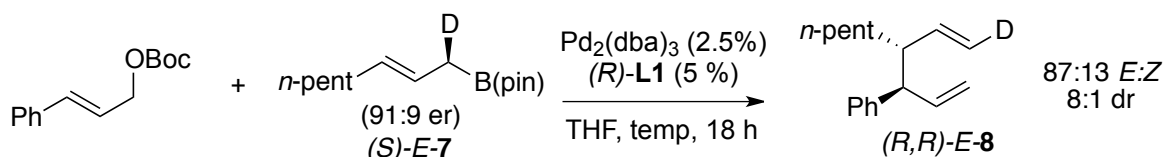Reaction with H<sub>2</sub>O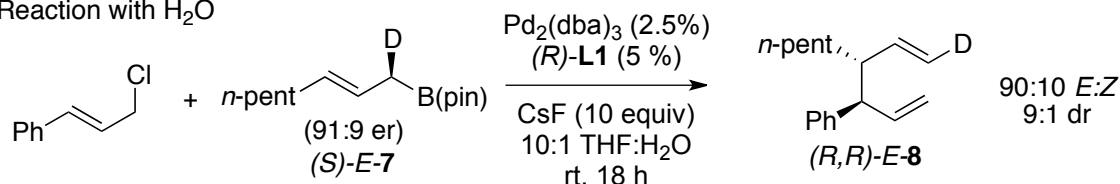Reaction with (*S*)-L1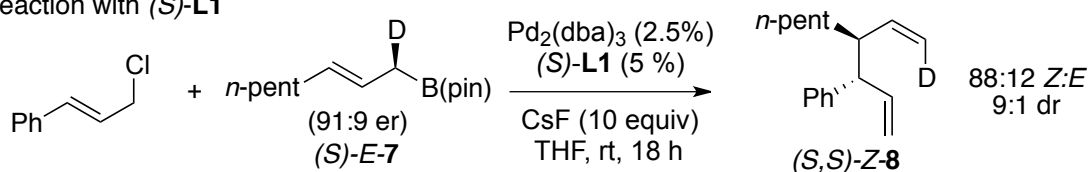

## Determination of Absolute Configuration of Labeled Allylboron with Mosher's Ester Analysis

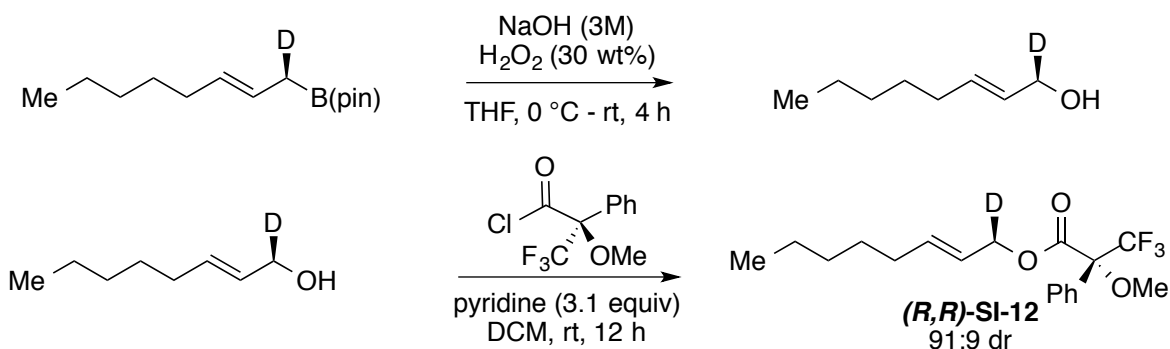Preparation of (*R,E*)-oct-2-en-1-yl-1-D (*R*)-3,3,3-trifluoro-2-methoxy-2-phenylpropanoate (Compound (*R,R*)-SI-12).

To a scintillation vial with a magnetic stir-bar was added (*S,E*)-4,4,5,5-tetramethyl-2-(oct-2-en-1-yl-1-d)-1,3,2-dioxaborolane (40.0 mg, 0.17 mmol) and THF (1.5 mL). The solution was cooled to 0 °C, and 1.0 mL of aqueous NaOH (3M) was added followed by dropwise addition of 0.8 mL of hydrogen peroxide (30 wt% solution in H<sub>2</sub>O). The solution was stirred at 0 °C for 15 minutes and then gradually warmed to room temperature for an additional 3.5 hours. The solution was then re-cooled to 0 °C and quenched with dropwise addition of saturated aqueous sodium thiosulfate. The solution was poured into a separatory funnel and extracted 3

times with diethyl ether. The organics were combined, dried over magnesium sulfate and concentrated *in vacuo*. The crude reaction mixture was purified on silica gel (3:1 pentane:diethyl ether) to afford the corresponding allylic alcohol as a clear, colorless oil (13.2 mg, 61% yield).  $R_f = 0.32$  (3:1 pentane:diethyl ether, stain in  $\text{KMnO}_4$ ).

The Mosher's ester (*R,R*-Si-X) was prepared using the literature procedure<sup>16</sup> with (*S*)-(+)- $\alpha$ -methoxy- $\alpha$ -trifluoromethylphenylacetyl chloride ((*S*)-MTPA-Cl). The crude reaction mixture was purified on silica gel (20:1 pentane:diethyl ether) to yield a clear, pale yellow oil (20.4 mg, 60% yield).

### Preparation of (*R,E*)-oct-2-en-1-yl-1-D (*S*)-3,3,3-trifluoro-2-methoxy-2-phenylpropanoate (Compound (*R,S*)-SI-12).

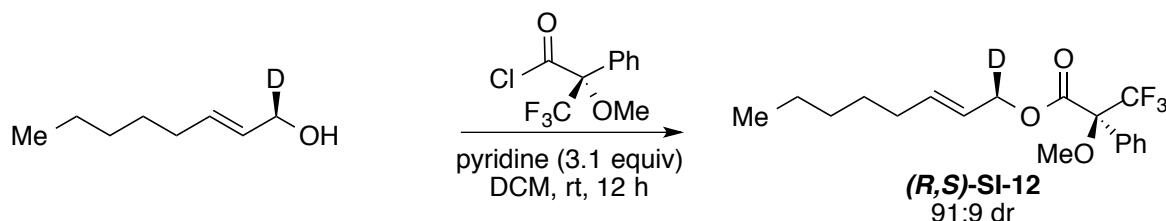

The opposite diastereomer was prepared using the same procedure as described above with (*R*)-(-)- $\alpha$ -methoxy- $\alpha$ -(trifluoromethyl)phenylacetyl chloride ((*R*)-MTPA-Cl). The crude reaction mixture was purified on silica gel (20:1 pentane:diethyl ether) to yield a clear, pale yellow oil (39.8 mg, 82% yield).

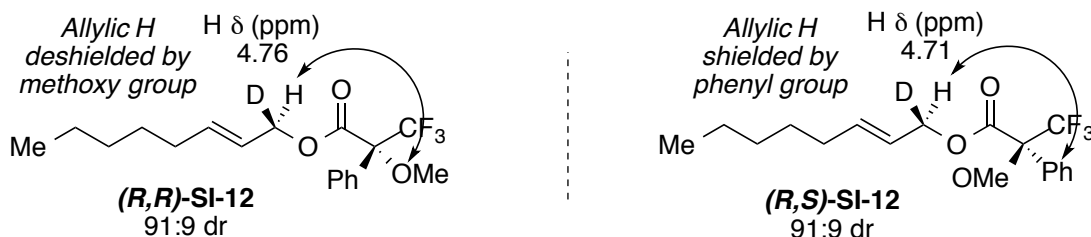

The absolute configuration of the resulting Mosher's esters was determined as described in the literature.<sup>17</sup> The literature procedure relies on the assumption that the preferred conformation for the allylic esters is as shown above. In (*R,R*)-SI-12, the allylic proton is deshielded by the methoxy group resulting in a downfield shift to 4.76 ppm, whereas in (*R,S*)-SI-12, the allylic proton is shielded by the phenyl group, resulting in an upfield shift to 4.71 ppm.

<sup>16</sup> Hoye, T. R.; Jeffry, C. S.; Shao, F. *Nature Protocols*, **2007**, *2*, 2451.

<sup>17</sup> Canon, J. S.; Olson, A. C.; Overman, L. E.; Solomon, N. S. *J. Org. Chem.* **2012**, *77*, 1961.

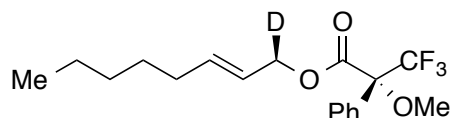

**(*R,E*)-oct-2-en-1-yl-1-D-(*R*)-3,3,3-trifluoro-2-methoxy-2-phenylpropanoate (Compound (*R,R*)-SI-12).**

$^1\text{H NMR}$  (500 MHz,  $\text{CDCl}_3$ ):  $\delta$  7.52-7.53 (2H, m), 7.37-7.41 (3H, m), 5.85 (1H, ddd (app dt),  $J = 15.0$  Hz, 7.0 Hz, 7.0 Hz), 5.58 (1H, dd,  $J = 15.0$  Hz, 6.0 Hz), 4.76 (1H, d,  $J = 6.0$  Hz), 3.56 (3H, s), 2.05 (2H, ddd (app q),  $J = 7.0$  Hz, 7.0 Hz, 7.0 Hz), 1.37 (2H, dddd (app p),  $J = 7.0$  Hz, 7.0 Hz, 7.0 Hz, 7.0 Hz), 1.24-1.33 (4H, m), 0.88 (3H, dd (app t),  $J = 7.0$  Hz, 7.0 Hz).;  $^{13}\text{C NMR}$  (125 MHz,  $\text{CDCl}_3$ ):  $\delta$  166.3, 138.7, 132.4, 129.5, 129.5, 128.3, 128.3, 127.3, 124.4, 122.3, 84.7, 66.7 (t), 55.4, 32.2, 31.2, 28.4, 22.5, 14.0; IR (neat): 2957 (w), 2930 (m), 2857 (w), 1747 (s), 1497 (w), 1452 (w), 1269 (m), 1244 (m), 1169 (s), 1123 (m), 1082 (w), 1023 (w), 996 (m), 970 (w), 919 (w), 765 (w), 716 (m), 697 (w), 646 (w)  $\text{cm}^{-1}$ ; HRMS-(ESI+) for  $\text{C}_{18}\text{H}_{26}\text{D}_1\text{F}_3\text{N}_1\text{O}_3$  [ $\text{M}+\text{NH}_4$ ]: calculated: 363.2006, found: 363.1992.  $[\alpha]^{22}_{\text{D}} = + 52.150$  ( $c = 1.02$ ,  $\text{CHCl}_3$ ).

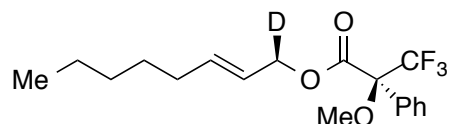

**(*R,E*)-oct-2-en-1-yl-1-D-(*S*)-3,3,3-trifluoro-2-methoxy-2-phenylpropanoate (Compound (*R,S*)-SI-12).**

$^1\text{H NMR}$  (500 MHz,  $\text{CDCl}_3$ ):  $\delta$  7.51-7.53 (2H, m), 7.37-7.41 (3H, m), 5.84 (1H, dddd (app dtd),  $J = 15.5$  Hz, 7.0 Hz, 7.0 Hz, 1.0 Hz), 5.58 (1H, dd,  $J = 15.5$  Hz, 6.5 Hz), 4.71 (1H, d,  $J = 6.5$  Hz), 3.56 (3H, s), 2.05 (2H, ddd (app q),  $J = 7.0$  Hz, 7.0 Hz, 7.0 Hz), 1.37 (2H, dddd (app p),  $J = 7.0$  Hz, 7.0 Hz, 7.0 Hz, 7.0 Hz), 1.23-1.32 (4H, m), 0.88 (3H, dd (app t),  $J = 7.0$  Hz, 7.0 Hz).;  $^{13}\text{C NMR}$  (125 MHz,  $\text{CDCl}_3$ ):  $\delta$  166.3, 138.7, 132.4, 129.5, 129.5, 128.3, 128.3, 127.3, 124.5, 122.3, 84.7, 66.7 (t), 55.5, 32.2, 31.2, 28.4, 22.5, 14.0; IR (neat): 2956 (w), 2929 (m), 2856 (w), 1746 (s), 1452 (w), 1269 (m), 1243 (m), 1167 (s), 1122 (m), 1081 (w), 1022 (w), 995 (m), 969 (w), 919 (m), 765 (w), 716 (w), 697 (m), 646 (w)  $\text{cm}^{-1}$ ; HRMS-(ESI+) for  $\text{C}_{18}\text{H}_{26}\text{D}_1\text{F}_3\text{N}_1\text{O}_3$  [ $\text{M}+\text{NH}_4$ ]: calculated: 363.2006, found: 363.1990.  $[\alpha]^{22}_{\text{D}} = - 53.038$  ( $c = 1.99$ ,  $\text{CHCl}_3$ ).

### Computational Details

All calculations were performed using Gaussian 09 with all geometry optimizations, energies and frequencies were calculated at the DFT level utilizing the B3LYP hybrid functional.<sup>18, 19</sup> The 6-31G\*\* basis set was used for the elements C, H, P, and O in conjunction with the LANL2DZ relativistic pseudopotential for Pd. The two oxygens and carbonyl carbon of the acetate group were augmented with diffuse functions. All free energies were calculated at 333.15 K. The PCM model was used to estimate the effect of solvation (THF).<sup>20</sup> The frequency calculations for transition states demonstrated one imaginary frequency each, and were found to be connected with the correct ground states through IRC calculations. NBO analysis was carried out with Gaussian NBO version 3.1.<sup>21</sup> The three-dimensional structures presented in Figure 1 were visualized utilizing CYLview.<sup>22</sup>

### Additional Computational Information:

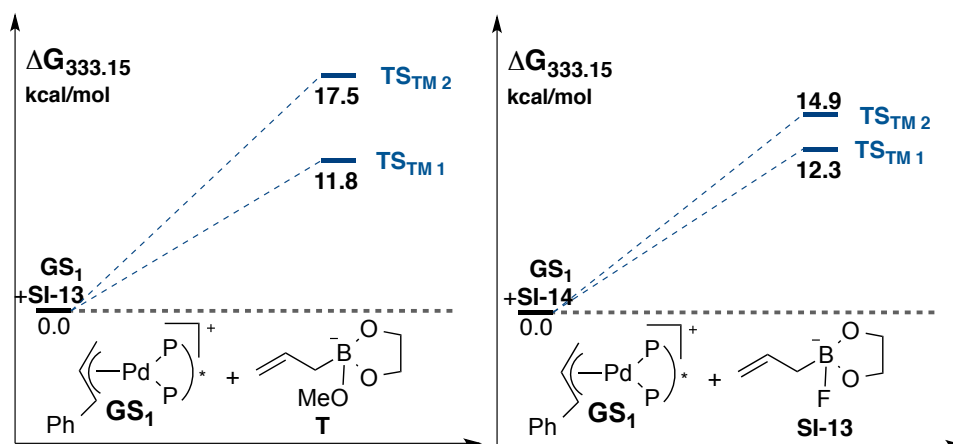

**Figure SI-1:** Calculated transition state energies for transmetalation with methoxide and fluoride.

<sup>18</sup> Gaussian 09, Revision A.02, M. J. Frisch, G. W. Trucks, H. B. Schlegel, G. E. Scuseria, M. A. Robb, J. R. Cheeseman, G. Scalmani, V. Barone, B. Mennucci, G. A. Petersson, H. Nakatsuji, M. Caricato, X. Li, H. P. Hratchian, A. F. Izmaylov, J. Bloino, G. Zheng, J. L. Sonnenberg, M. Hada, M. Ehara, K. Toyota, R. Fukuda, J. Hasegawa, M. Ishida, T. Nakajima, Y. Honda, O. Kitao, H. Nakai, T. Vreven, J. A. Montgomery, Jr., J. E. Peralta, F. Ogliaro, M. Bearpark, J. J. Heyd, E. Brothers, K. N. Kudin, V. N. Staroverov, R. Kobayashi, J. Normand, K. Raghavachari, A. Rendell, J. C. Burant, S. S. Iyengar, J. Tomasi, M. Cossi, N. Rega, J. M. Millam, M. Klene, J. E. Knox, J. B. Cross, V. Bakken, C. Adamo, J. Jaramillo, R. Gomperts, R. E. Stratmann, O. Yazyev, A. J. Austin, R. Cammi, C. Pomelli, J. W. Ochterski, R. L. Martin, K. Morokuma, V. G. Zakrzewski, G. A. Voth, P. Salvador, J. J. Dannenberg, S. Dapprich, A. D. Daniels, Ö. Farkas, J. B. Foresman, J. V. Ortiz, J. Cioslowski, and D. J. Fox, Gaussian, Inc., Wallingford CT, 2009.

<sup>19</sup> (a) A. D. Becke, *Phys. Rev. A* 1988, 38, 3098; (b) C. Lee, W. Yang, R. G. Parr, *Phys. Rev. B* 1988, 37, 785.

<sup>20</sup> (a) S. Miertus, E. Scrocco, J. Tomassi, *Chem. Phys.* 1981, 55, 117. (b) V. Barone, M. Cossi, J. Tomassi, *Chem. Phys.* 1997, 107, 3210.

<sup>21</sup> NBO Version 3.1, E. D. Glendening, A. E. Reed, J. E. Carpenter, and F. Weinhold.

<sup>22</sup> CYLview, 1.0b; Legault, C. Y., Université de Sherbrooke, 2009 (<http://www.cylview.org>).

**Structures and Energies from Figure 3**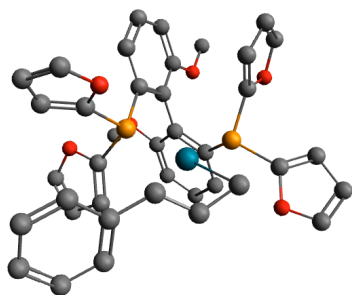**GS<sub>1</sub>**

-----  
 Cartesian coordinates (Angstroms):  
 -----

Pd -0.829 1.473 -0.366  
 C -1.185 3.611 -0.728  
 P 1.508 1.559 -0.008  
 O 3.898 1.080 -1.279  
 O 1.991 -3.267 1.833  
 O 1.350 3.876 1.431  
 C 2.544 1.253 -1.448  
 C 2.239 1.223 -2.783  
 H 1.253 1.330 -3.212  
 C 3.469 1.015 -3.478  
 H 3.612 0.933 -4.546  
 C 4.436 0.935 -2.521  
 H 5.505 0.786 -2.554  
 C 1.912 0.327 1.305  
 C 1.877 -1.057 1.051  
 C 2.034 -1.946 2.143  
 C 2.216 -1.461 3.443  
 H 2.337 -2.142 4.275  
 C 2.246 -0.086 3.666  
 H 2.393 0.289 4.675  
 C 2.093 0.809 2.612  
 H 2.112 1.874 2.809  
 C 2.156 -4.223 2.878  
 H 3.129 -4.116 3.370  
 H 2.100 -5.200 2.397  
 H 1.358 -4.140 3.625  
 C 2.163 3.136 0.601  
 C 2.029 5.016 1.745  
 H 1.515 5.703 2.400  
 C 3.248 5.029 1.137  
 H 3.992 5.809 1.205  
 C 3.338 3.810 0.396  
 H 4.168 3.470 -0.205  
 P -0.984 -0.923 -0.418  
 O -1.417 -3.085 1.222  
 O 4.063 -2.078 -0.155  
 O -2.468 -0.756 -2.688  
 C -1.418 -1.711 1.142  
 C -1.788 -1.180 2.349  
 H -1.873 -0.129 2.581

C -2.030 -2.284 3.224  
 H -2.339 -2.244 4.258  
 C -1.790 -3.408 2.490  
 H -1.838 -4.463 2.711  
 C 0.549 -1.754 -1.033  
 C 1.759 -1.654 -0.319  
 C 2.930 -2.208 -0.893  
 C 2.887 -2.838 -2.142  
 H 3.783 -3.262 -2.578  
 C 1.678 -2.924 -2.827  
 H 1.645 -3.419 -3.793  
 C 0.515 -2.386 -2.286  
 H -0.415 -2.465 -2.836  
 C 5.278 -2.624 -0.663  
 H 5.202 -3.708 -0.807  
 H 6.036 -2.413 0.092  
 H 5.565 -2.150 -1.608  
 C -2.282 -1.501 -1.544  
 C -3.455 -1.365 -3.405  
 H -3.713 -0.896 -4.342  
 C -3.909 -2.471 -2.750  
 H -4.689 -3.140 -3.082  
 C -3.147 -2.562 -1.543  
 H -3.221 -3.319 -0.777  
 C -2.343 3.129 -0.087  
 H -1.107 3.583 -1.814  
 H -0.559 4.337 -0.223  
 C -3.104 2.091 -0.653  
 H -2.523 3.424 0.944  
 C -4.242 1.429 -0.000  
 C -5.145 0.699 -0.794  
 C -4.489 1.517 1.385  
 C -5.605 0.905 1.946  
 C -6.262 0.085 -0.230  
 C -6.498 0.187 1.142  
 H -6.947 -0.472 -0.862  
 H -7.367 -0.290 1.585  
 H -4.969 0.617 -1.863  
 H -3.805 2.059 2.030  
 H -5.780 0.984 3.015  
 H -3.041 1.954 -1.732

|                                              | 1       | 2            | 3                  |
|----------------------------------------------|---------|--------------|--------------------|
|                                              | A       | A            | A                  |
| Frequencies --                               | 12.0054 | 19.3890      | 28.3761            |
| Red. masses --                               | 6.2586  | 5.8317       | 5.9247             |
| ZERO-POINT CORRECTION=<br>PARTICLE)          |         |              | 0.626388 (HARTREE/ |
| Thermal correction to Energy=                |         | 0.681127     |                    |
| Thermal correction to Enthalpy=              |         | 0.682182     |                    |
| Thermal correction to Gibbs Free Energy=     |         | 0.528552     |                    |
| Sum of electronic and zero-point Energies=   |         | -2765.974536 |                    |
| Sum of electronic and thermal Energies=      |         | -2765.919798 |                    |
| Sum of electronic and thermal Enthalpies=    |         | -2765.918743 |                    |
| Sum of electronic and thermal Free Energies= |         | -2766.072373 |                    |

| ITEM          | VALUE    | THRESHOLD | CONVERGED? |
|---------------|----------|-----------|------------|
| MAXIMUM FORCE | 0.000020 | 0.000450  | YES        |
| RMS FORCE     | 0.000003 | 0.000300  | YES        |

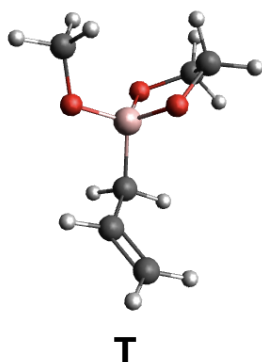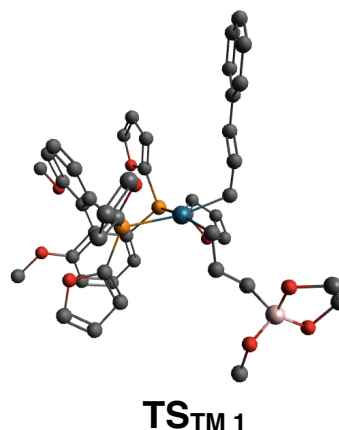

-----  
 Cartesian coordinates (Angstroms):  
 -----

C -2.514 0.202 -0.135  
 C -3.417 -0.550 0.509  
 H -2.609 1.287 -0.052  
 H -4.217 -0.111 1.101  
 B 0.132 0.154 -0.278  
 C -1.337 -0.268 -0.919  
 H -1.373 0.181 -1.925  
 H -1.382 -1.358 -1.052  
 O 0.366 -0.517 1.043  
 O 0.144 1.623 -0.196  
 O 1.261 -0.339 -1.136  
 H -3.380 -1.638 0.475  
 C 1.871 -1.423 -0.486  
 C 1.610 -1.172 1.008  
 C 1.280 2.219 0.366  
 H 2.417 -0.544 1.433  
 H 1.585 -2.105 1.595  
 H 2.945 -1.477 -0.725  
 H 1.422 -2.390 -0.788  
 H 1.174 3.313 0.331  
 H 2.205 1.954 -0.173  
 H 1.429 1.933 1.420

|                                              | 1       | 2        | 3                               |
|----------------------------------------------|---------|----------|---------------------------------|
|                                              | A       | A        | A                               |
| Frequencies --                               | 43.7482 | 81.9629  | 93.6789                         |
| Red. masses --                               | 3.2096  | 2.6852   | 1.7032                          |
| ZERO-POINT CORRECTION=                       |         |          | 0.180618 (HARTREE/<br>PARTICLE) |
| Thermal correction to Energy=                |         | 0.194238 |                                 |
| Thermal correction to Enthalpy=              |         | 0.195293 |                                 |
| Thermal correction to Gibbs Free Energy=     |         | 0.137067 |                                 |
| Sum of electronic and zero-point Energies=   |         |          | -486.400757                     |
| Sum of electronic and thermal Energies=      |         |          | -486.387136                     |
| Sum of electronic and thermal Enthalpies=    |         |          | -486.386081                     |
| Sum of electronic and thermal Free Energies= |         |          | -486.444307                     |

| ITEM          | VALUE    | THRESHOLD | CONVERGED? |
|---------------|----------|-----------|------------|
| MAXIMUM FORCE | 0.000014 | 0.000450  | YES        |
| RMS FORCE     | 0.000003 | 0.000300  | YES        |

-----

-----  
 Cartesian coordinates (Angstroms):  
 -----

Pd -0.864 0.245 0.197  
 P 0.391 -1.114 -1.446  
 O 1.264 -3.656 -2.081  
 O 5.248 -0.155 0.102  
 O -0.846 0.168 -3.507  
 C 0.540 -2.897 -1.189  
 C 0.025 -3.711 -0.214  
 H -0.567 -3.392 0.631  
 C 0.449 -5.041 -0.520  
 H 0.230 -5.942 0.034  
 C 1.195 -4.947 -1.657  
 H 1.716 -5.670 -2.266  
 C 2.112 -0.478 -1.714  
 C 3.089 -0.608 -0.709  
 C 4.350 0.007 -0.906  
 C 4.620 0.731 -2.071  
 H 5.584 1.200 -2.221  
 C 3.635 0.848 -3.051  
 H 3.847 1.406 -3.958  
 C 2.389 0.254 -2.880  
 H 1.638 0.360 -3.653  
 C 6.538 0.435 -0.030  
 H 7.076 0.036 -0.898  
 H 7.079 0.175 0.880  
 H 6.471 1.526 -0.114  
 C -0.365 -1.058 -3.099  
 C -1.430 -0.013 -4.726  
 H -1.850 0.872 -5.180  
 C -1.346 -1.318 -5.106  
 H -1.726 -1.748 -6.021  
 C -0.654 -1.998 -4.053  
 H -0.395 -3.044 -4.012  
 P 1.084 0.522 1.569  
 O 3.388 2.020 1.825  
 O 4.286 -3.017 -0.494  
 O -0.343 0.202 3.872  
 C 2.193 1.885 1.153  
 C 2.058 2.906 0.250  
 H 1.218 3.057 -0.412  
 C 3.230 3.715 0.367

H 3.469 4.607 -0.194  
 C 3.998 3.133 1.332  
 H 4.956 3.375 1.766  
 C 2.126 -1.009 1.636  
 C 2.895 -1.426 0.532  
 C 3.569 -2.670 0.608  
 C 3.479 -3.468 1.753  
 H 3.998 -4.417 1.809  
 C 2.708 -3.036 2.830  
 H 2.637 -3.656 3.720  
 C 2.031 -1.822 2.778  
 H 1.435 -1.511 3.627  
 C 4.983 -4.260 -0.493  
 H 5.739 -4.296 0.299  
 H 5.475 -4.324 -1.464  
 H 4.294 -5.104 -0.379  
 C 0.721 0.877 3.316  
 C -0.465 0.631 5.159  
 H -1.264 0.183 5.729  
 C 0.484 1.566 5.442  
 H 0.621 2.080 6.382  
 C 1.256 1.725 4.248  
 H 2.106 2.374 4.101  
 C -1.936 1.724 1.308  
 C -2.071 2.851 0.385  
 C -1.369 4.010 0.461  
 H -2.788 2.728 -0.426  
 C -1.440 5.154 -0.449  
 C -0.697 6.313 -0.144  
 C -2.216 5.168 -1.629  
 C -2.247 6.289 -2.453  
 C -0.727 7.435 -0.971  
 C -1.504 7.431 -2.132  
 H -0.144 8.314 -0.709  
 H -1.531 8.302 -2.779  
 H -0.090 6.327 0.758  
 H -2.798 4.294 -1.905  
 H -2.853 6.272 -3.355  
 H -0.673 4.127 1.292  
 H -2.872 1.219 1.548  
 H -1.392 1.976 2.218  
 C -3.098 -1.355 0.111  
 C -2.834 -0.231 -0.713  
 H -2.610 -2.286 -0.180  
 H -3.489 0.627 -0.580  
 B -5.652 -2.158 0.478  
 C -3.988 -1.432 1.192  
 H -4.347 -0.492 1.610  
 H -3.783 -2.197 1.942  
 O -6.521 -2.120 1.634  
 O -5.359 -3.439 -0.065  
 O -6.139 -1.205 -0.484  
 H -2.582 -0.430 -1.752  
 C -7.347 -0.645 0.027  
 C -7.283 -0.921 1.537  
 C -5.037 -4.508 0.801  
 H -8.218 -1.141 -0.427  
 H -7.400 0.425 -0.205

H -8.270 -1.066 1.990  
 H -6.776 -0.099 2.067  
 H -4.066 -4.359 1.298  
 H -4.970 -5.425 0.205  
 H -5.800 -4.653 1.577

|                                              | 1         | 2            | 3                               |
|----------------------------------------------|-----------|--------------|---------------------------------|
|                                              | A         | A            | A                               |
| Frequencies --                               | -204.1962 | 8.9821       | 12.0045                         |
| Red. masses --                               | 7.8750    | 6.3836       | 6.1373                          |
| ZERO-POINT CORRECTION=                       |           |              | 0.808419 (HARTREE/<br>PARTICLE) |
| Thermal correction to Energy=                |           | 0.878320     |                                 |
| Thermal correction to Enthalpy=              |           | 0.879375     |                                 |
| Thermal correction to Gibbs Free Energy=     |           | 0.688344     |                                 |
| Sum of electronic and zero-point Energies=   |           | -3252.377796 |                                 |
| Sum of electronic and thermal Energies=      |           | -3252.307895 |                                 |
| Sum of electronic and thermal Enthalpies=    |           | -3252.306840 |                                 |
| Sum of electronic and thermal Free Energies= |           | -3252.497871 |                                 |

| ITEM          | VALUE    | THRESHOLD | CONVERGED? |
|---------------|----------|-----------|------------|
| MAXIMUM FORCE | 0.000003 | 0.000450  | YES        |
| RMS FORCE     | 0.000001 | 0.000300  | YES        |

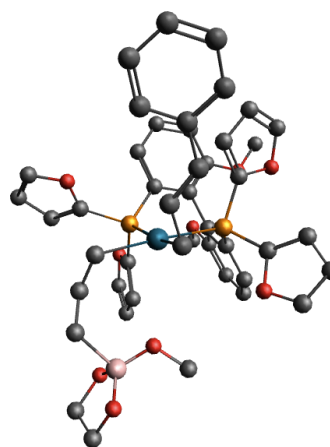TS<sub>TM</sub> 2

-----  
 Cartesian coordinates (Angstroms):  
 -----

Pd 0.206 -1.227 0.078  
 P -0.854 0.408 1.605  
 O -3.208 1.816 1.961  
 O 0.791 4.898 -0.423  
 O 0.163 -0.728 3.880  
 C -2.584 0.796 1.274  
 C -3.480 0.177 0.444  
 H -3.270 -0.663 -0.205  
 C -4.729 0.850 0.625  
 H -5.665 0.630 0.134  
 C -4.505 1.830 1.547  
 H -5.133 2.583 1.998  
 C 0.049 2.026 1.684  
 C 0.039 2.917 0.594  
 C 0.846 4.080 0.662  
 C 1.640 4.339 1.784



*Ardolino & Morken, Supporting Information*

H 2.255 5.228 1.834  
 C 1.637 3.439 2.848  
 H 2.252 3.640 3.720  
 C 0.855 2.289 2.804  
 H 0.875 1.602 3.640  
 C 1.575 6.086 -0.423  
 H 1.291 6.757 0.397  
 H 1.372 6.576 -1.376  
 H 2.645 5.861 -0.353  
 C -0.950 -0.111 3.349  
 C -0.140 -1.073 5.164  
 H 0.646 -1.566 5.716  
 C -1.414 -0.703 5.469  
 H -1.920 -0.854 6.411  
 C -1.941 -0.078 4.294  
 H -2.924 0.351 4.168  
 P 0.763 0.525 -1.475  
 O 2.615 2.544 -1.832  
 O -2.140 4.481 0.265  
 O 0.243 -0.927 -3.737  
 C 2.293 1.416 -1.110  
 C 3.301 1.136 -0.226  
 H 3.324 0.302 0.460  
 C 4.297 2.144 -0.406  
 H 5.233 2.242 0.125  
 C 3.829 2.968 -1.386  
 H 4.220 3.856 -1.860  
 C -0.569 1.805 -1.636  
 C -0.828 2.739 -0.615  
 C -1.944 3.603 -0.755  
 C -2.772 3.531 -1.878  
 H -3.623 4.192 -1.983  
 C -2.498 2.594 -2.873  
 H -3.141 2.537 -3.746  
 C -1.412 1.734 -2.758  
 H -1.223 1.010 -3.540  
 C -3.242 5.378 0.192  
 H -3.167 6.039 -0.679  
 H -3.199 5.977 1.103  
 H -4.196 4.839 0.158  
 C 1.084 0.019 -3.196  
 C 0.690 -1.194 -4.996  
 H 0.120 -1.923 -5.551  
 C 1.798 -0.453 -5.275  
 H 2.365 -0.464 -6.195  
 C 2.055 0.335 -4.109  
 H 2.851 1.050 -3.968  
 C 1.347 -2.649 -1.046  
 C 2.557 -2.890 -0.257  
 C 3.795 -2.423 -0.557  
 H 2.432 -3.487 0.645  
 C 5.023 -2.614 0.217  
 C 6.246 -2.156 -0.317  
 C 5.060 -3.235 1.485  
 C 6.260 -3.395 2.172  
 C 7.447 -2.316 0.373  
 C 7.463 -2.938 1.623  
 H 8.373 -1.953 -0.068

H 8.397 -3.064 2.164  
 H 6.245 -1.672 -1.291  
 H 4.141 -3.591 1.939  
 H 6.258 -3.877 3.147  
 H 3.913 -1.847 -1.474  
 H 0.677 -3.507 -1.110  
 H 1.555 -2.252 -2.038  
 C -1.727 -3.169 1.384  
 C -0.318 -2.961 1.353  
 H -2.309 -2.464 1.981  
 H 0.090 -2.532 2.269  
 B -3.517 -3.466 -0.775  
 C -2.449 -4.170 0.733  
 H -3.359 -4.491 1.235  
 H -1.876 -4.978 0.279  
 O -3.918 -4.674 -1.441  
 O -2.623 -2.599 -1.453  
 O -4.686 -2.860 -0.198  
 H 0.250 -3.815 0.992  
 C -5.682 -3.867 -0.116  
 C -5.311 -4.866 -1.232  
 C -3.031 -2.210 -2.758  
 H -6.677 -3.427 -0.248  
 H -5.661 -4.357 0.872  
 H -5.861 -4.648 -2.161  
 H -5.524 -5.905 -0.953  
 H -3.949 -1.604 -2.730  
 H -3.221 -3.083 -3.396  
 H -2.232 -1.613 -3.203

|                                              | 1         | 2            | 3                  |
|----------------------------------------------|-----------|--------------|--------------------|
|                                              | A         | A            | A                  |
| Frequencies --                               | -303.4273 | 11.7917      | 14.8387            |
| Red. masses --                               | 8.1807    | 6.2800       | 5.6666             |
| ZERO-POINT CORRECTION=                       |           |              | 0.809099 (HARTREE/ |
| PARTICLE)                                    |           |              |                    |
| Thermal correction to Energy=                |           | 0.878623     |                    |
| Thermal correction to Enthalpy=              |           | 0.879678     |                    |
| Thermal correction to Gibbs Free Energy=     |           | 0.692415     |                    |
| Sum of electronic and zero-point Energies=   |           | -3252.372185 |                    |
| Sum of electronic and thermal Energies=      |           | -3252.302661 |                    |
| Sum of electronic and thermal Enthalpies=    |           | -3252.301606 |                    |
| Sum of electronic and thermal Free Energies= |           | -3252.488870 |                    |

| ITEM          | VALUE    | THRESHOLD | CONVERGED? |
|---------------|----------|-----------|------------|
| MAXIMUM FORCE | 0.000004 | 0.000450  | YES        |
| RMS FORCE     | 0.000001 | 0.000300  | YES        |

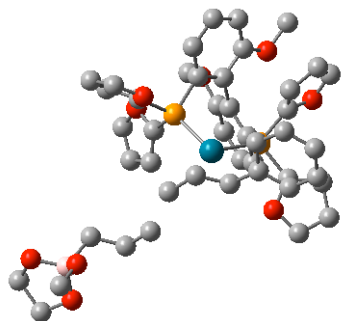

**TS<sub>0.s.-linear</sub>**

-----  
 Cartesian coordinates (Angstroms):  
 -----

Pd -0.071 0.709 -0.190  
 P 0.383 -1.553 -0.834  
 O 0.629 -4.141 0.102  
 O 5.538 -1.304 -0.247  
 O -1.109 -1.244 -3.090  
 C 0.187 -2.869 0.387  
 C -0.406 -2.858 1.622  
 H -0.837 -1.996 2.109  
 C -0.326 -4.192 2.129  
 H -0.690 -4.555 3.079  
 C 0.309 -4.923 1.170  
 H 0.595 -5.961 1.094  
 C 2.124 -1.645 -1.457  
 C 3.220 -1.502 -0.584  
 C 4.520 -1.422 -1.141  
 C 4.714 -1.464 -2.526  
 H 5.709 -1.396 -2.948  
 C 3.612 -1.597 -3.370  
 H 3.762 -1.634 -4.444  
 C 2.326 -1.687 -2.847  
 H 1.483 -1.790 -3.519  
 C 6.873 -1.224 -0.736  
 H 7.147 -2.120 -1.305  
 H 7.509 -1.150 0.147  
 H 7.018 -0.336 -1.362  
 C -0.625 -2.186 -2.208  
 C -1.866 -1.903 -4.010  
 H -2.316 -1.290 -4.776  
 C -1.887 -3.239 -3.742  
 H -2.412 -3.999 -4.302  
 C -1.081 -3.425 -2.576  
 H -0.861 -4.354 -2.072  
 P 2.027 1.127 0.868  
 O 4.640 1.831 0.335  
 O 3.874 -3.724 0.798  
 O 0.777 2.423 2.909  
 C 3.357 1.782 -0.163  
 C 3.334 2.316 -1.424  
 H 2.462 2.420 -2.052  
 C 4.674 2.714 -1.725  
 H 5.033 3.173 -2.635

C 5.419 2.395 -0.628  
 H 6.465 2.500 -0.385  
 C 2.707 -0.392 1.679  
 C 3.107 -1.506 0.913  
 C 3.492 -2.688 1.593  
 C 3.468 -2.756 2.990  
 H 3.761 -3.662 3.505  
 C 3.063 -1.643 3.724  
 H 3.048 -1.694 4.809  
 C 2.684 -0.469 3.081  
 H 2.375 0.385 3.671  
 C 4.267 -4.948 1.412  
 H 5.141 -4.812 2.059  
 H 4.527 -5.620 0.593  
 H 3.448 -5.385 1.994  
 C 1.958 2.359 2.202  
 C 0.908 3.425 3.824  
 H 0.056 3.592 4.465  
 C 2.135 4.009 3.719  
 H 2.509 4.830 4.314  
 C 2.818 3.318 2.669  
 C -2.740 0.746 -0.141  
 C -1.961 1.725 -0.799  
 C -1.137 2.647 -0.096  
 H -2.055 1.797 -1.878  
 C -0.464 3.801 -0.723  
 C -0.014 4.856 0.093  
 C -0.252 3.904 -2.113  
 C 0.379 5.019 -2.659  
 C 0.620 5.971 -0.455  
 C 0.820 6.059 -1.834  
 H 0.956 6.772 0.197  
 H 1.312 6.927 -2.263  
 H -0.167 4.798 1.167  
 H -0.574 3.104 -2.773  
 H 0.529 5.077 -3.734  
 H -1.311 2.749 0.974  
 H -3.120 -0.100 -0.698  
 H -2.665 0.627 0.932  
 C -5.464 0.612 0.651  
 C -4.846 1.616 -0.055  
 H -5.458 0.695 1.739  
 H -4.550 2.537 0.437  
 B -7.854 -0.351 0.261  
 C -6.142 -0.544 0.107  
 H -5.938 -1.452 0.686  
 H -5.928 -0.705 -0.954  
 O -8.516 -1.606 -0.142  
 O -8.197 0.764 -0.598  
 O -8.196 -0.172 1.693  
 H -4.942 1.656 -1.136  
 C -9.060 -1.217 2.088  
 C -8.843 -2.314 1.032  
 C -9.561 1.100 -0.666  
 H -10.114 -0.886 2.087  
 H -8.826 -1.560 3.107  
 H -9.733 -2.940 0.875  
 H -8.019 -2.984 1.341

H-10.175 0.284 -1.078  
H-9.682 1.977 -1.316  
H-9.975 1.354 0.323  
H 3.819 3.501 2.308

|                                              |           |              |                    |
|----------------------------------------------|-----------|--------------|--------------------|
|                                              | 1         | 2            | 3                  |
|                                              | A         | A            | A                  |
| Frequencies --                               | -334.3002 | 6.7634       | 10.9959            |
| Red. masses --                               | 9.7879    | 6.6342       | 6.1716             |
| ZERO-POINT CORRECTION=                       |           |              | 0.807659 (HARTREE/ |
| PARTICLE)                                    |           |              |                    |
| Thermal correction to Energy=                |           | 0.877709     |                    |
| Thermal correction to Enthalpy=              |           | 0.878764     |                    |
| Thermal correction to Gibbs Free Energy=     |           | 0.686110     |                    |
| Sum of electronic and zero-point Energies=   |           | -3252.360635 |                    |
| Sum of electronic and thermal Energies=      |           | -3252.290585 |                    |
| Sum of electronic and thermal Enthalpies=    |           | -3252.289530 |                    |
| Sum of electronic and thermal Free Energies= |           | -3252.482184 |                    |

| ITEM          | VALUE    | THRESHOLD | CONVERGED? |
|---------------|----------|-----------|------------|
| MAXIMUM FORCE | 0.000003 | 0.000450  | YES        |
| RMS FORCE     | 0.000001 | 0.000300  | YES        |

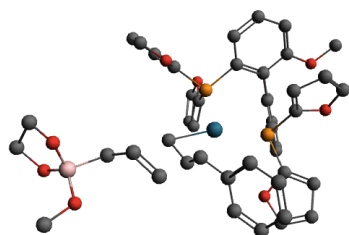

**TS0.S.-Re**

-----  
Cartesian coordinates (Angstroms):  
-----

C 2.234 -0.699 -0.658  
P -0.966 -1.969 0.024  
O -2.516 -3.838 -1.306  
O -5.473 0.176 1.469  
O 0.968 -2.998 1.648  
C -1.661 -2.766 -1.441  
C -1.447 -2.518 -2.771  
H -0.824 -1.732 -3.173  
C -2.208 -3.486 -3.498  
H -2.281 -3.591 -4.571  
C -2.834 -4.254 -2.563  
H -3.505 -5.098 -2.623  
C -2.363 -1.697 1.210  
C -3.467 -0.892 0.866  
C -4.424 -0.594 1.868  
C -4.274 -1.074 3.173  
H -5.005 -0.841 3.937  
C -3.169 -1.862 3.491  
H -3.053 -2.237 4.504  
C -2.219 -2.173 2.524  
H -1.366 -2.784 2.794  
C -6.478 0.508 2.422  
H -6.967 -0.388 2.820  
H -7.211 1.110 1.884  
H -6.066 1.096 3.250  
C -0.024 -3.343 0.755

C 1.574 -4.151 2.044  
H 2.380 -4.039 2.754  
C 1.007 -5.225 1.428  
H 1.291 -6.261 1.549  
C -0.032 -4.704 0.594  
H -0.705 -5.262 -0.039  
P -1.645 1.534 -0.292  
O -3.408 2.840 1.398  
O -5.336 -2.116 -0.638  
O -0.590 3.057 -2.282  
C -2.228 2.135 1.310  
C -1.657 2.048 2.551  
H -0.729 1.546 2.785  
C -2.527 2.732 3.456  
H -2.397 2.863 4.521  
C -3.569 3.188 2.704  
H -4.460 3.752 2.935  
C -3.106 0.724 -1.103  
C -3.742 -0.392 -0.522  
C -4.755 -1.054 -1.260  
C -5.113 -0.623 -2.541  
H -5.886 -1.133 -3.103  
C -4.464 0.477 -3.098  
H -4.742 0.815 -4.092  
C -3.470 1.147 -2.392  
H -2.981 2.001 -2.845  
C -6.354 -2.837 -1.324  
H -7.216 -2.199 -1.553  
H -6.665 -3.632 -0.645  
H -5.974 -3.281 -2.252  
C -1.462 3.092 -1.216  
C -0.593 4.295 -2.847  
H 0.049 4.423 -3.705  
C -1.436 5.127 -2.172  
H -1.630 6.166 -2.395  
C -2.002 4.347 -1.115  
H -2.724 4.667 -0.379  
C 2.366 0.708 -0.773  
C 2.666 1.540 0.347  
H 2.383 1.152 -1.765  
C 2.504 3.004 0.365  
C 2.325 3.651 1.603  
C 2.542 3.791 -0.801  
C 2.398 5.174 -0.728  
C 2.177 5.034 1.675  
C 2.214 5.802 0.508  
H 2.035 5.512 2.639  
H 2.104 6.881 0.561  
H 2.304 3.057 2.513  
H 2.694 3.322 -1.768  
H 2.431 5.766 -1.637  
H 2.594 1.067 1.321  
H 2.539 -1.197 0.257  
H 2.280 -1.311 -1.554  
Pd 0.241 0.033 -0.348  
C 5.282 0.312 0.828  
C 4.954 1.603 0.466  
B 7.352 -0.970 -0.151

C 5.585 -0.770 -0.057  
 O 7.586 -2.112 -1.046  
 O 7.883 -1.366 1.157  
 O 7.839 0.296 -0.633  
 C 9.203 0.343 -0.981  
 C 8.009 -2.772 1.157  
 C 8.243 -3.133 -0.321  
 H 9.322 -3.142 -0.551  
 H 7.842 -4.124 -0.581  
 H 7.088 -3.256 1.530  
 H 8.834 -3.087 1.810  
 H 9.441 1.350 -1.347  
 H 9.453 -0.377 -1.775  
 H 9.859 0.130 -0.122  
 H 4.982 2.398 1.203  
 H 5.049 1.910 -0.571  
 H 5.335 0.097 1.897  
 H 5.267 -1.748 0.314  
 H 5.275 -0.605 -1.092

|                                              |           |              |                                 |
|----------------------------------------------|-----------|--------------|---------------------------------|
|                                              | 1         | 2            | 3                               |
|                                              | A         | A            | A                               |
| Frequencies --                               | -322.4118 | 7.5894       | 13.2829                         |
| Red. masses --                               | 9.4276    | 6.2624       | 6.2143                          |
| ZERO-POINT CORRECTION=                       |           |              | 0.807768 (HARTREE/<br>PARTICLE) |
| Thermal correction to Energy=                |           | 0.877575     |                                 |
| Thermal correction to Enthalpy=              |           | 0.878630     |                                 |
| Thermal correction to Gibbs Free Energy=     |           | 0.688195     |                                 |
| Sum of electronic and zero-point Energies=   |           | -3252.356921 |                                 |
| Sum of electronic and thermal Energies=      |           | -3252.287114 |                                 |
| Sum of electronic and thermal Enthalpies=    |           | -3252.286058 |                                 |
| Sum of electronic and thermal Free Energies= |           | -3252.476494 |                                 |

| ITEM          | VALUE    | THRESHOLD | CONVERGED? |
|---------------|----------|-----------|------------|
| MAXIMUM FORCE | 0.000003 | 0.000450  | YES        |
| RMS FORCE     | 0.000000 | 0.000300  | YES        |

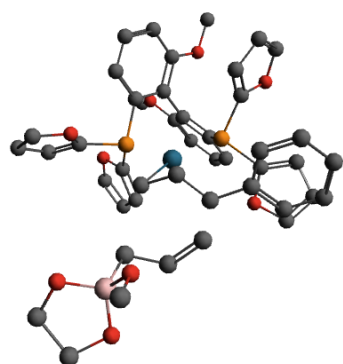

TS0.s.-Re

-----  
 Cartesian coordinates (Angstroms):  
 -----

Pd -0.241 -0.060 -0.045  
 P 1.056 -2.044 -0.098  
 O 2.732 -3.672 1.397  
 O 5.382 0.458 -1.528  
 O -0.643 -3.404 -1.753

C 1.777 -2.680 1.432  
 C 1.479 -2.382 2.736  
 H 0.768 -1.639 3.066  
 C 2.293 -3.229 3.550  
 H 2.327 -3.267 4.629  
 C 3.031 -3.984 2.688  
 H 3.776 -4.754 2.825  
 C 2.438 -1.665 -1.272  
 C 3.484 -0.788 -0.922  
 C 4.391 -0.382 -1.933  
 C 4.252 -0.832 -3.250  
 H 4.945 -0.516 -4.019  
 C 3.210 -1.701 -3.570  
 H 3.105 -2.056 -4.591  
 C 2.308 -2.116 -2.597  
 H 1.499 -2.781 -2.871  
 C 6.315 0.930 -2.495  
 H 6.877 0.106 -2.950  
 H 7.004 1.578 -1.952  
 H 5.817 1.510 -3.281  
 C 0.303 -3.563 -0.763  
 C -1.111 -4.644 -2.071  
 H -1.864 -4.678 -2.843  
 C -0.499 -5.593 -1.310  
 H -0.676 -6.659 -1.345  
 C 0.420 -4.895 -0.464  
 H 1.088 -5.325 0.267  
 P 1.571 1.495 0.350  
 O 3.291 3.246 -0.936  
 O 5.454 -1.958 0.482  
 O 0.305 2.486 2.538  
 C 2.193 2.424 -1.072  
 C 1.748 2.472 -2.366  
 H 0.906 1.923 -2.763  
 C 2.612 3.370 -3.069  
 H 2.560 3.650 -4.111  
 C 3.524 3.806 -2.155  
 H 4.362 4.485 -2.208  
 C 3.081 0.729 1.121  
 C 3.763 -0.325 0.479  
 C 4.835 -0.954 1.160  
 C 5.208 -0.548 2.446  
 H 6.026 -1.032 2.964  
 C 4.518 0.494 3.061  
 H 4.810 0.814 4.057  
 C 3.465 1.128 2.411  
 H 2.946 1.939 2.908  
 C 6.536 -2.639 1.109  
 H 7.365 -1.958 1.333  
 H 6.870 -3.390 0.392  
 H 6.216 -3.137 2.032  
 C 1.160 2.832 1.514  
 C 0.143 3.590 3.319  
 H -0.505 3.471 4.174  
 C 0.860 4.636 2.821  
 H 0.913 5.634 3.232  
 C 1.523 4.145 1.652  
 H 2.193 4.687 1.002

C -2.227 -0.819 -0.345  
 C -2.348 0.536 -0.728  
 C -2.745 1.581 0.159  
 H -2.285 0.770 -1.788  
 C -2.598 3.015 -0.160  
 C -2.534 3.944 0.895  
 C -2.542 3.500 -1.480  
 C -2.415 4.864 -1.731  
 C -2.405 5.308 0.643  
 C -2.345 5.775 -0.673  
 H -2.349 6.006 1.473  
 H -2.248 6.838 -0.872  
 H -2.580 3.587 1.920  
 H -2.610 2.812 -2.317  
 H -2.375 5.219 -2.757  
 H -2.732 1.346 1.217  
 H -2.229 -1.592 -1.105  
 H -2.575 -1.130 0.638  
 C -5.356 0.404 0.700  
 C -5.014 1.605 0.107  
 H -5.478 0.403 1.784  
 H -5.108 2.530 0.665  
 B -7.358 -1.071 -0.096  
 C -5.592 -0.837 0.033  
 H -5.295 -1.717 0.608  
 H -5.236 -0.873 -0.999  
 O -7.928 -1.090 1.259  
 O -7.579 -2.408 -0.647  
 O -7.799 -0.006 -0.958  
 H -5.048 1.696 -0.975  
 C -9.178 0.022 -1.249  
 C -7.862 -3.274 0.432  
 C -8.502 -2.362 1.493  
 H -9.598 -2.327 1.365  
 H -8.300 -2.702 2.518  
 H -6.938 -3.736 0.824  
 H -8.525 -4.088 0.109  
 H -9.387 0.888 -1.890  
 H -9.789 0.118 -0.338  
 H -9.512 -0.883 -1.778

|                                              |           |              |                    |
|----------------------------------------------|-----------|--------------|--------------------|
|                                              | 1         | 2            | 3                  |
|                                              | A         | A            | A                  |
| Frequencies --                               | -342.5207 | 8.2593       | 14.1704            |
| Red. masses --                               | 9.5609    | 6.2948       | 6.1750             |
| ZERO-POINT CORRECTION=                       |           |              | 0.807630 (HARTREE/ |
| PARTICLE)                                    |           |              |                    |
| Thermal correction to Energy=                |           | 0.877624     |                    |
| Thermal correction to Enthalpy=              |           | 0.878679     |                    |
| Thermal correction to Gibbs Free Energy=     |           | 0.687747     |                    |
| Sum of electronic and zero-point Energies=   |           | -3252.355374 |                    |
| Sum of electronic and thermal Energies=      |           | -3252.285380 |                    |
| Sum of electronic and thermal Enthalpies=    |           | -3252.284325 |                    |
| Sum of electronic and thermal Free Energies= |           | -3252.475258 |                    |

  

|               |          |           |            |
|---------------|----------|-----------|------------|
| ITEM          | VALUE    | THRESHOLD | CONVERGED? |
| MAXIMUM FORCE | 0.000005 | 0.000450  | YES        |
| RMS FORCE     | 0.000001 | 0.000300  | YES        |

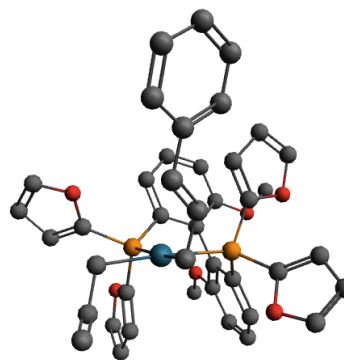

GS<sub>2</sub>

-----  
 Cartesian coordinates (Angstroms):  
 -----

Pd 0.861 1.001 0.971  
 C 2.656 0.532 2.054  
 P 0.120 -1.336 0.909  
 O 0.093 -3.516 -0.807  
 O -4.799 -0.750 -0.685  
 O 0.834 -1.986 3.472  
 C 0.573 -2.243 -0.588  
 C 1.413 -1.891 -1.612  
 H 1.928 -0.947 -1.707  
 C 1.454 -3.001 -2.512  
 H 2.011 -3.077 -3.434  
 C 0.636 -3.951 -1.976  
 H 0.350 -4.945 -2.286  
 C -1.719 -1.494 1.105  
 C -2.607 -1.123 0.076  
 C -3.998 -1.122 0.349  
 C -4.485 -1.482 1.609  
 H -5.548 -1.482 1.814  
 C -3.586 -1.842 2.613  
 H -3.962 -2.121 3.592  
 C -2.217 -1.845 2.372  
 H -1.539 -2.115 3.171  
 C -6.208 -0.724 -0.484  
 H -6.598 -1.717 -0.228  
 H -6.638 -0.403 -1.434  
 H -6.489 -0.011 0.299  
 C 0.785 -2.463 2.180  
 C 1.407 -2.955 4.241  
 H 1.507 -2.723 5.290  
 C 1.736 -4.034 3.479  
 H 2.206 -4.945 3.822  
 C 1.333 -3.718 2.143  
 H 1.425 -4.345 1.269  
 P -1.055 1.674 -0.399  
 O -3.719 2.382 -0.110  
 O -3.013 -2.898 -1.916  
 O 0.379 3.344 -2.013  
 C -2.541 2.092 0.544  
 C -2.727 2.222 1.895

H -1.978 2.048 2.653  
 C -4.090 2.609 2.089  
 H -4.591 2.798 3.027  
 C -4.640 2.688 0.844  
 H -5.625 2.940 0.482  
 C -1.586 0.442 -1.681  
 C -2.176 -0.784 -1.318  
 C -2.440 -1.737 -2.334  
 C -2.120 -1.473 -3.669  
 H -2.323 -2.202 -4.443  
 C -1.530 -0.255 -4.003  
 H -1.281 -0.047 -5.040  
 C -1.260 0.695 -3.024  
 H -0.794 1.630 -3.308  
 C -3.311 -3.899 -2.883  
 H -4.024 -3.536 -3.633  
 H -3.760 -4.724 -2.329  
 H -2.404 -4.253 -3.388  
 C -0.826 3.204 -1.360  
 C 0.371 4.564 -2.621  
 H 1.259 4.815 -3.182  
 C -0.799 5.214 -2.370  
 H -1.077 6.197 -2.721  
 C -1.578 4.333 -1.554  
 H -2.571 4.508 -1.169  
 C 1.518 3.029 1.222  
 C 1.086 3.529 2.540  
 H 1.049 3.581 0.406  
 H 2.604 3.041 1.095  
 C 1.868 3.811 3.599  
 H 0.010 3.682 2.654  
 C 3.617 0.010 1.081  
 H 2.325 -0.216 2.776  
 H 2.990 1.434 2.564  
 C 4.696 0.670 0.589  
 H 3.423 -1.001 0.722  
 C 5.648 0.184 -0.412  
 H 4.904 1.668 0.977  
 C 6.781 0.967 -0.719  
 C 5.503 -1.041 -1.102  
 C 6.448 -1.458 -2.036  
 C 7.725 0.550 -1.656  
 C 7.568 -0.669 -2.321  
 H 8.587 1.178 -1.866  
 H 8.301 -0.997 -3.051  
 H 6.916 1.917 -0.207  
 H 4.639 -1.670 -0.910  
 H 6.309 -2.406 -2.549  
 H 1.450 4.159 4.540  
 H 2.950 3.711 3.553

|                                            | 1      | 2        | 3                  |
|--------------------------------------------|--------|----------|--------------------|
|                                            | A      | A        | A                  |
| Frequencies --                             | 9.6142 | 11.5893  | 17.2865            |
| Red. masses --                             | 6.3842 | 6.1238   | 5.8262             |
| ZERO-POINT CORRECTION=                     |        |          | 0.695331 (HARTREE/ |
| PARTICLE)                                  |        |          |                    |
| Thermal correction to Energy=              |        | 0.755747 |                    |
| Thermal correction to Enthalpy=            |        | 0.756803 |                    |
| Thermal correction to Gibbs Free Energy=   |        | 0.588320 |                    |
| Sum of electronic and zero-point Energies= |        |          | -2883.324160       |

Sum of electronic and thermal Energies= -2883.263743  
 Sum of electronic and thermal Enthalpies= -2883.262688  
 Sum of electronic and thermal Free Energies= -2883.431170

| ITEM          | VALUE    | THRESHOLD | CONVERGED? |
|---------------|----------|-----------|------------|
| MAXIMUM FORCE | 0.000015 | 0.000450  | YES        |
| RMS FORCE     | 0.000002 | 0.000300  | YES        |

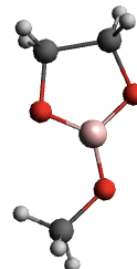

MeOB(glycolato)

-----  
 Cartesian coordinates (Angstroms):  
 -----

B -0.261 -0.278 -0.008  
 O 0.175 1.029 0.063  
 O -1.559 -0.665 -0.025  
 O 0.757 -1.205 -0.067  
 C 1.991 -0.485 0.092  
 C 1.606 1.003 -0.083  
 C -2.606 0.307 0.018  
 H 2.713 -0.825 -0.655  
 H 2.397 -0.690 1.089  
 H 1.869 1.383 -1.077  
 H 2.063 1.650 0.670  
 H -2.893 0.507 1.055  
 H -3.467 -0.104 -0.514  
 H -2.303 1.246 -0.454

|                                              | 1       | 2        | 3                  |
|----------------------------------------------|---------|----------|--------------------|
|                                              | A       | A        | A                  |
| Frequencies --                               | 51.6488 | 105.4232 | 120.9307           |
| Red. masses --                               | 1.0428  | 2.2443   | 2.9668             |
| ZERO-POINT CORRECTION=                       |         |          | 0.113305 (HARTREE/ |
| PARTICLE)                                    |         |          |                    |
| Thermal correction to Energy=                |         | 0.122014 |                    |
| Thermal correction to Enthalpy=              |         | 0.123069 |                    |
| Thermal correction to Gibbs Free Energy=     |         | 0.076079 |                    |
| Sum of electronic and zero-point Energies=   |         |          | -369.081808        |
| Sum of electronic and thermal Energies=      |         |          | -369.073099        |
| Sum of electronic and thermal Enthalpies=    |         |          | -369.072044        |
| Sum of electronic and thermal Free Energies= |         |          | -369.119034        |

| ITEM          | VALUE    | THRESHOLD | CONVERGED? |
|---------------|----------|-----------|------------|
| MAXIMUM FORCE | 0.000008 | 0.000450  | YES        |
| RMS FORCE     | 0.000002 | 0.000300  | YES        |

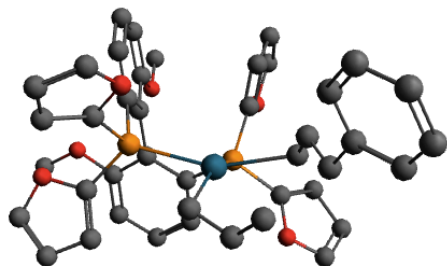TS<sub>3,3'</sub>-Si A

-----  
 Cartesian coordinates (Angstroms):  
 -----

Pd 1.053 0.021 -0.530  
 P -0.652 1.776 -0.232  
 O -1.973 3.386 1.615  
 O -4.955 -1.130 -0.257  
 O 0.409 3.150 -2.326  
 C -0.985 2.445 1.420  
 C -0.367 2.186 2.615  
 H 0.435 1.479 2.769  
 C -1.002 3.007 3.599  
 H -0.774 3.064 4.654  
 C -1.965 3.709 2.938  
 H -2.693 4.445 3.247  
 C -2.305 1.279 -0.910  
 C -3.070 0.275 -0.285  
 C -4.258 -0.165 -0.918  
 C -4.662 0.372 -2.144  
 H -5.569 0.032 -2.627  
 C -3.883 1.358 -2.749  
 H -4.196 1.777 -3.701  
 C -2.715 1.809 -2.145  
 H -2.124 2.575 -2.632  
 C -6.156 -1.625 -0.838  
 H -6.902 -0.830 -0.960  
 H -6.538 -2.373 -0.142  
 H -5.967 -2.097 -1.809  
 C -0.263 3.313 -1.133  
 C 0.662 4.393 -2.823  
 H 1.183 4.425 -3.768  
 C 0.183 5.350 -1.980  
 H 0.247 6.420 -2.118  
 C -0.419 4.651 -0.886  
 H -0.913 5.083 -0.028  
 P -0.563 -1.761 -0.094  
 O -2.587 -3.331 -1.172  
 O -4.461 1.046 1.898  
 O 1.302 -3.173 1.304  
 C -1.596 -2.410 -1.436  
 C -1.555 -2.167 -2.784  
 H -0.886 -1.481 -3.283  
 C -2.570 -2.977 -3.384  
 H -2.824 -3.040 -4.432  
 C -3.162 -3.657 -2.362  
 H -3.965 -4.376 -2.315

C -1.743 -1.292 1.258  
 C -2.738 -0.315 1.054  
 C -3.515 0.102 2.164  
 C -3.300 -0.434 3.437  
 H -3.895 -0.111 4.282  
 C -2.304 -1.393 3.616  
 H -2.137 -1.811 4.605  
 C -1.530 -1.820 2.544  
 H -0.758 -2.563 2.707  
 C -5.253 1.538 2.973  
 H -5.849 0.742 3.434  
 H -5.921 2.280 2.535  
 H -4.632 2.017 3.739  
 C 0.184 -3.312 0.509  
 C 1.751 -4.425 1.598  
 H 2.627 -4.475 2.226  
 C 0.961 -5.365 1.008  
 H 1.084 -6.437 1.065  
 C -0.056 -4.646 0.304  
 H -0.868 -5.061 -0.273  
 C 2.316 -1.462 -1.672  
 C 2.667 1.576 -0.044  
 C 3.840 0.941 0.395  
 C 5.004 0.795 -0.376  
 H 3.829 0.509 1.395  
 C 3.435 -0.855 -2.282  
 C 4.718 -0.877 -1.750  
 H 3.259 -0.255 -3.177  
 H 4.954 -1.621 -0.994  
 H 5.559 -0.570 -2.364  
 H 2.728 2.190 -0.941  
 H 2.047 2.006 0.740  
 H 2.525 -2.239 -0.938  
 H 1.484 -1.700 -2.334  
 C 6.296 0.396 0.220  
 H 5.098 1.481 -1.215  
 C 6.390 -0.506 1.300  
 C 7.626 -0.861 1.837  
 C 8.809 -0.336 1.306  
 C 7.498 0.904 -0.308  
 C 8.736 0.547 0.226  
 H 9.646 0.962 -0.201  
 H 9.771 -0.617 1.724  
 H 5.485 -0.940 1.716  
 H 7.668 -1.556 2.672  
 H 7.454 1.596 -1.146

|                                              | 1         | 2            | 3                               |
|----------------------------------------------|-----------|--------------|---------------------------------|
|                                              | A         | A            | A                               |
| Frequencies --                               | -374.5002 | 6.9123       | 13.6319                         |
| Red. masses --                               | 11.3678   | 6.0679       | 6.0301                          |
| ZERO-POINT CORRECTION=                       |           |              | 0.694249 (HARTREE/<br>PARTICLE) |
| Thermal correction to Energy=                |           | 0.753963     |                                 |
| Thermal correction to Enthalpy=              |           | 0.755018     |                                 |
| Thermal correction to Gibbs Free Energy=     |           | 0.589128     |                                 |
| Sum of electronic and zero-point Energies=   |           | -2883.303765 |                                 |
| Sum of electronic and thermal Energies=      |           | -2883.244052 |                                 |
| Sum of electronic and thermal Enthalpies=    |           | -2883.242996 |                                 |
| Sum of electronic and thermal Free Energies= |           | -2883.408886 |                                 |

| ITEM          | VALUE    | THRESHOLD | CONVERGED? |
|---------------|----------|-----------|------------|
| MAXIMUM FORCE | 0.000003 | 0.000450  | YES        |
| RMS FORCE     | 0.000000 | 0.000300  | YES        |

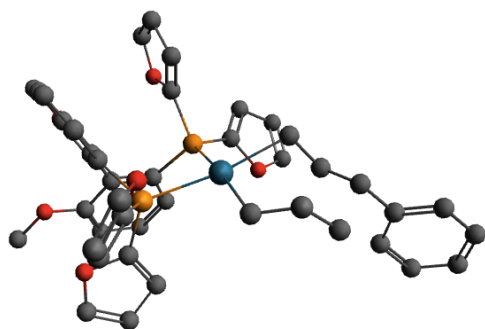TS<sub>3,3'</sub>-Re a

-----  
 Cartesian coordinates (Angstroms):  
 -----

Pd 1.018 0.594 -0.760  
 P -0.147 -1.599 -0.303  
 O -1.867 -3.422 -1.517  
 O -4.471 -0.003 2.110  
 O 1.964 -2.792 0.963  
 C -1.078 -2.304 -1.690  
 C -1.109 -1.929 -3.007  
 H -0.589 -1.083 -3.433  
 C -1.960 -2.857 -3.684  
 H -2.218 -2.867 -4.734  
 C -2.392 -3.734 -2.734  
 H -3.042 -4.596 -2.759  
 C -1.325 -1.557 1.132  
 C -2.528 -0.826 1.070  
 C -3.318 -0.716 2.242  
 C -2.913 -1.308 3.442  
 H -3.517 -1.220 4.336  
 C -1.713 -2.017 3.482  
 H -1.396 -2.479 4.413  
 C -0.922 -2.141 2.346  
 H 0.008 -2.692 2.406  
 C -5.312 0.149 3.248  
 H -5.669 -0.820 3.617  
 H -6.163 0.742 2.912  
 H -4.799 0.678 4.059  
 C 0.925 -3.026 0.086  
 C 2.682 -3.947 1.062  
 H 3.531 -3.917 1.727  
 C 2.142 -4.912 0.267  
 H 2.505 -5.922 0.145  
 C 1.004 -4.318 -0.365  
 H 0.322 -4.790 -1.056  
 P -1.037 1.812 -0.133  
 O -2.450 2.618 2.125  
 O -4.592 -2.003 -0.204  
 O -0.869 3.769 -2.038  
 C -1.274 2.085 1.642  
 C -0.400 1.902 2.681

H 0.597 1.494 2.600  
 C -1.068 2.340 3.868  
 H -0.682 2.338 4.877  
 C -2.303 2.759 3.471  
 H -3.153 3.167 3.997  
 C -2.582 0.985 -0.750  
 C -3.066 -0.212 -0.186  
 C -4.170 -0.855 -0.803  
 C -4.764 -0.326 -1.951  
 H -5.605 -0.821 -2.421  
 C -4.261 0.854 -2.498  
 H -4.721 1.269 -3.391  
 C -3.182 1.504 -1.912  
 H -2.807 2.415 -2.361  
 C -5.689 -2.707 -0.775  
 H -6.600 -2.097 -0.781  
 H -5.845 -3.580 -0.140  
 H -5.466 -3.037 -1.796  
 C -1.225 3.529 -0.726  
 C -1.009 5.107 -2.261  
 H -0.772 5.445 -3.258  
 C -1.432 5.735 -1.129  
 H -1.623 6.792 -1.013  
 C -1.572 4.715 -0.134  
 H -1.902 4.842 0.885  
 C 2.103 2.586 -0.833  
 C 2.791 -0.559 -1.688  
 C 3.862 -0.567 -0.782  
 C 5.025 0.222 -0.916  
 H 3.759 -1.187 0.105  
 C 3.427 2.585 -1.313  
 C 4.551 2.230 -0.563  
 H 3.574 2.762 -2.380  
 H 4.450 2.179 0.520  
 H 5.529 2.558 -0.902  
 H 2.217 -1.475 -1.782  
 H 2.942 -0.040 -2.634  
 H 1.381 3.125 -1.439  
 H 1.982 2.740 0.242  
 C 6.186 0.013 -0.018  
 H 5.307 0.461 -1.938  
 C 6.035 -0.280 1.351  
 C 7.144 -0.465 2.175  
 C 8.438 -0.350 1.659  
 C 7.496 0.138 -0.518  
 C 8.607 -0.043 0.306  
 H 9.607 0.053 -0.110  
 H 9.302 -0.491 2.303  
 H 5.037 -0.354 1.775  
 H 6.998 -0.693 3.228  
 H 7.640 0.371 -1.571

|                                          | 1         | 2        | 3                  |
|------------------------------------------|-----------|----------|--------------------|
|                                          | A         | A        | A                  |
| Frequencies --                           | -430.3849 | 8.0689   | 12.1402            |
| Red. masses --                           | 10.3665   | 6.3302   | 5.4390             |
| ZERO-POINT CORRECTION=                   |           |          | 0.694583 (HARTREE/ |
| PARTICLE)                                |           |          |                    |
| Thermal correction to Energy=            |           | 0.754164 |                    |
| Thermal correction to Enthalpy=          |           | 0.755219 |                    |
| Thermal correction to Gibbs Free Energy= |           | 0.590177 |                    |



# Ardolino & Morken, Supporting Information

Sum of electronic and zero-point Energies= -2883.298735  
 Sum of electronic and thermal Energies= -2883.239154  
 Sum of electronic and thermal Enthalpies= -2883.238099  
 Sum of electronic and thermal Free Energies= -2883.403141

| ITEM          | VALUE    | THRESHOLD | CONVERGED? |
|---------------|----------|-----------|------------|
| MAXIMUM FORCE | 0.000011 | 0.000450  | YES        |
| RMS FORCE     | 0.000001 | 0.000300  | YES        |

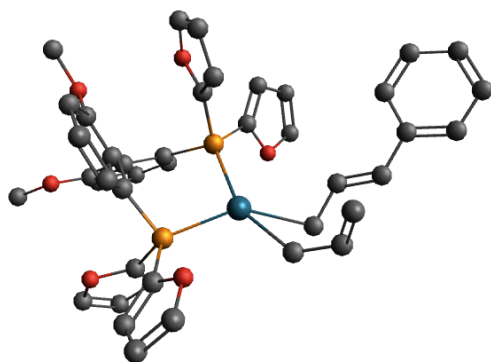

**TS<sub>1,1'</sub>**

-----  
 Cartesian coordinates (Angstroms):  
 -----

P 1.744 1.654 -0.071  
 O 4.255 1.530 -1.271  
 O 2.942 -3.069 1.764  
 O 1.345 3.905 1.413  
 C 2.891 1.513 -1.469  
 C 2.631 1.436 -2.812  
 H 1.648 1.399 -3.259  
 C 3.895 1.405 -3.480  
 H 4.075 1.343 -4.544  
 C 4.840 1.462 -2.499  
 H 5.919 1.466 -2.507  
 C 2.382 0.491 1.231  
 C 2.496 -0.893 0.989  
 C 2.829 -1.746 2.071  
 C 3.023 -1.238 3.359  
 H 3.270 -1.894 4.183  
 C 2.896 0.133 3.577  
 H 3.049 0.532 4.576  
 C 2.580 0.992 2.530  
 H 2.483 2.053 2.726  
 C 3.263 -3.985 2.804  
 H 4.237 -3.760 3.255  
 H 3.303 -4.968 2.334  
 H 2.494 -3.988 3.586  
 C 2.242 3.295 0.561  
 C 1.840 5.139 1.713  
 H 1.243 5.736 2.385  
 C 3.023 5.345 1.070  
 H 3.636 6.233 1.121  
 C 3.286 4.151 0.326  
 H 4.144 3.946 -0.297  
 P -0.475 -1.188 -0.314

O -0.345 -3.247 1.558  
 O 4.719 -1.619 -0.340  
 O -2.098 -1.738 -2.436  
 C -0.616 -1.913 1.342  
 C -1.017 -1.338 2.518  
 H -1.288 -0.301 2.650  
 C -0.995 -2.366 3.513  
 H -1.250 -2.274 4.559  
 C -0.579 -3.496 2.875  
 H -0.409 -4.512 3.200  
 C 1.141 -1.813 -0.996  
 C 2.368 -1.524 -0.367  
 C 3.570 -1.911 -1.012  
 C 3.550 -2.549 -2.255  
 H 4.471 -2.839 -2.746  
 C 2.325 -2.812 -2.867  
 H 2.305 -3.308 -3.833  
 C 1.133 -2.452 -2.249  
 H 0.195 -2.667 -2.746  
 C 5.964 -1.963 -0.935  
 H 6.054 -3.046 -1.087  
 H 6.731 -1.634 -0.233  
 H 6.106 -1.450 -1.894  
 C -1.703 -2.213 -1.202  
 C -3.062 -2.578 -2.908  
 H -3.466 -2.334 -3.879  
 C -3.306 -3.572 -2.010  
 H -4.022 -4.375 -2.119  
 C -2.426 -3.339 -0.905  
 H -2.328 -3.935 -0.011  
 Pd -0.618 1.202 -0.463  
 C -2.587 1.886 -1.563  
 C -1.669 3.295 -0.166  
 C -2.941 3.804 0.363  
 C -3.374 3.644 1.623  
 H -3.578 4.350 -0.334  
 H -2.787 3.101 2.361  
 H -4.324 4.052 1.955  
 C -3.643 1.022 -1.053  
 C -4.894 1.424 -0.717  
 H -3.375 -0.023 -0.933  
 H -1.220 3.929 -0.929  
 H -0.968 3.121 0.656  
 H -1.908 1.395 -2.274  
 H -2.937 2.818 -2.000  
 C -5.976 0.579 -0.203  
 H -5.158 2.470 -0.860  
 C -5.801 -0.770 0.173  
 C -7.268 1.129 -0.073  
 C -8.338 0.371 0.401  
 C -6.870 -1.527 0.646  
 C -8.146 -0.965 0.762  
 H -4.819 -1.229 0.102  
 H -6.706 -2.563 0.929  
 H -9.322 0.824 0.488  
 H -8.976 -1.559 1.133  
 H -7.428 2.168 -0.352

1

2

3

Ardolino & Morken, Supporting Information

|                                              |           |              |                                 |
|----------------------------------------------|-----------|--------------|---------------------------------|
|                                              | A         | A            | A                               |
| Frequencies --                               | -388.2070 | 9.1092       | 14.9023                         |
| Red. masses --                               | 4.0109    | 6.4111       | 5.3768                          |
| ZERO-POINT CORRECTION=                       |           |              | 0.693424 (HARTREE/<br>PARTICLE) |
| Thermal correction to Energy=                |           | 0.753758     |                                 |
| Thermal correction to Enthalpy=              |           | 0.754813     |                                 |
| Thermal correction to Gibbs Free Energy=     |           | 0.586713     |                                 |
| Sum of electronic and zero-point Energies=   |           | -2883.275677 |                                 |
| Sum of electronic and thermal Energies=      |           | -2883.215343 |                                 |
| Sum of electronic and thermal Enthalpies=    |           | -2883.214288 |                                 |
| Sum of electronic and thermal Free Energies= |           | -2883.382388 |                                 |

| ITEM          | VALUE    | THRESHOLD | CONVERGED? |
|---------------|----------|-----------|------------|
| MAXIMUM FORCE | 0.000003 | 0.000450  | YES        |
| RMS FORCE     | 0.000001 | 0.000300  | YES        |

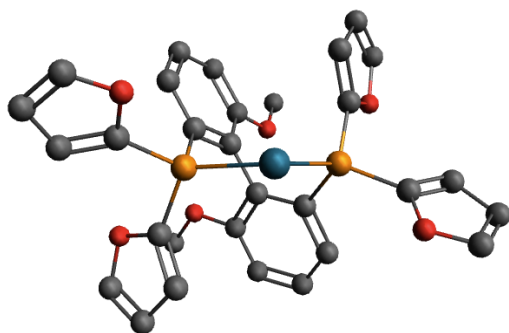

PdLn

-----  
 Cartesian coordinates (Angstroms):  
 -----

Pd -0.000 2.176 0.000  
 P 1.933 0.939 0.035  
 O 3.420 -0.779 -1.573  
 O -1.123 -3.153 1.148  
 O 3.451 2.452 1.701  
 C 2.513 0.259 -1.545  
 C 2.221 0.636 -2.828  
 H 1.534 1.420 -3.111  
 C 2.982 -0.210 -3.695  
 H 3.000 -0.198 -4.775  
 C 3.688 -1.045 -2.881  
 H 4.392 -1.842 -3.065  
 C 1.410 -0.533 1.057  
 C 0.332 -1.364 0.676  
 C -0.103 -2.360 1.586  
 C 0.491 -2.506 2.844  
 H 0.146 -3.264 3.537  
 C 1.545 -1.669 3.202  
 H 2.014 -1.782 4.175  
 C 2.003 -0.695 2.321  
 H 2.827 -0.057 2.619  
 C -1.611 -4.173 2.009  
 H -0.830 -4.902 2.258  
 H -2.407 -4.675 1.456  
 H -2.024 -3.755 2.935  
 C 3.530 1.428 0.778  
 C 4.718 2.730 2.111

H 4.815 3.517 2.844  
 C 5.614 1.924 1.475  
 H 6.687 1.929 1.601  
 C 4.845 1.079 0.614  
 H 5.214 0.305 -0.043  
 P -1.933 0.939 -0.035  
 O -3.420 -0.779 1.573  
 O 1.123 -3.153 -1.148  
 O -3.451 2.452 -1.701  
 C -2.513 0.259 1.545  
 C -2.221 0.636 2.828  
 H -1.534 1.420 3.111  
 C -2.982 -0.210 3.695  
 H -3.000 -0.198 4.775  
 C -3.688 -1.045 2.881  
 H -4.392 -1.842 3.065  
 C -1.410 -0.533 -1.057  
 C -0.332 -1.364 -0.676  
 C 0.103 -2.360 -1.586  
 C -0.491 -2.506 -2.844  
 H -0.146 -3.264 -3.537  
 C -1.545 -1.669 -3.202  
 H -2.014 -1.782 -4.175  
 C -2.003 -0.695 -2.321  
 H -2.827 -0.057 -2.619  
 C 1.611 -4.173 -2.009  
 H 0.830 -4.902 -2.258  
 H 2.407 -4.675 -1.456  
 H 2.024 -3.755 -2.935  
 C -3.530 1.428 -0.778  
 C -4.718 2.730 -2.111  
 H -4.815 3.517 -2.844  
 C -5.614 1.924 -1.475  
 H -6.687 1.929 -1.601  
 C -4.845 1.079 -0.614  
 H -5.214 0.305 0.043

|                                              |         |         |                                 |
|----------------------------------------------|---------|---------|---------------------------------|
|                                              | 1       | 2       | 3                               |
|                                              | A       | A       | A                               |
| Frequencies --                               | -6.5886 | 22.7440 | 33.5422                         |
| Red. masses --                               | 6.8626  | 6.1981  | 4.8096                          |
| ZERO-POINT CORRECTION=                       |         |         | 0.472498 (HARTREE/<br>PARTICLE) |
| Thermal correction to Energy=                |         |         | 0.515538                        |
| Thermal correction to Enthalpy=              |         |         | 0.516593                        |
| Thermal correction to Gibbs Free Energy=     |         |         | 0.390226                        |
| Sum of electronic and zero-point Energies=   |         |         | -2417.878301                    |
| Sum of electronic and thermal Energies=      |         |         | -2417.835261                    |
| Sum of electronic and thermal Enthalpies=    |         |         | -2417.834206                    |
| Sum of electronic and thermal Free Energies= |         |         | -2417.960573                    |

| ITEM          | VALUE    | THRESHOLD | CONVERGED? |
|---------------|----------|-----------|------------|
| MAXIMUM FORCE | 0.000001 | 0.000015  | YES        |
| RMS FORCE     | 0.000000 | 0.000010  | YES        |

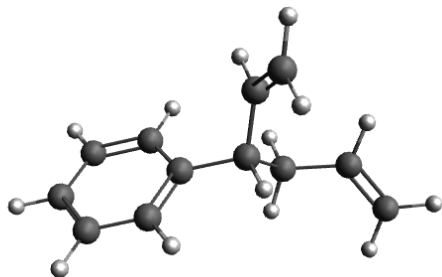**Branched**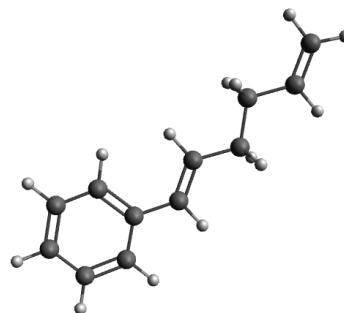**Linear**

-----  
 Cartesian coordinates (Angstroms):  
 -----

C 1.548 -0.857 -0.475  
 C 0.739 0.291 0.203  
 C 3.030 -0.766 -0.237  
 H 1.349 -0.831 -1.555  
 H 1.171 -1.817 -0.107  
 C 1.095 1.642 -0.380  
 C 1.653 2.645 0.298  
 H 0.864 1.777 -1.437  
 H 1.900 2.554 1.353  
 H 1.883 3.595 -0.177  
 C 3.765 -1.709 0.354  
 H 3.514 0.151 -0.574  
 H 3.324 -2.638 0.710  
 H 4.836 -1.592 0.500  
 H 1.010 0.299 1.265  
 C -0.763 0.032 0.109  
 C -1.413 -0.074 -1.130  
 C -1.529 -0.106 1.274  
 C -2.903 -0.344 1.208  
 C -2.787 -0.311 -1.200  
 C -3.538 -0.448 -0.030  
 H -3.271 -0.390 -2.170  
 H -4.607 -0.633 -0.084  
 H -0.847 0.028 -2.052  
 H -1.043 -0.025 2.243  
 H -3.476 -0.449 2.126

|                                              | 1       | 2           | 3                               |
|----------------------------------------------|---------|-------------|---------------------------------|
|                                              | A       | A           | A                               |
| Frequencies --                               | 36.3057 | 60.4610     | 72.3007                         |
| Red. masses --                               | 3.6970  | 2.7976      | 3.0255                          |
| ZERO-POINT CORRECTION=                       |         |             | 0.223164 (HARTREE/<br>PARTICLE) |
| Thermal correction to Energy=                |         | 0.237567    |                                 |
| Thermal correction to Enthalpy=              |         | 0.238622    |                                 |
| Thermal correction to Gibbs Free Energy=     |         | 0.177883    |                                 |
| Sum of electronic and zero-point Energies=   |         | -465.461123 |                                 |
| Sum of electronic and thermal Energies=      |         | -465.446719 |                                 |
| Sum of electronic and thermal Enthalpies=    |         | -465.445664 |                                 |
| Sum of electronic and thermal Free Energies= |         | -465.506404 |                                 |

| ITEM          | VALUE    | THRESHOLD | CONVERGED? |
|---------------|----------|-----------|------------|
| MAXIMUM FORCE | 0.000008 | 0.000450  | YES        |
| RMS FORCE     | 0.000002 | 0.000300  | YES        |

---

-----  
 Cartesian coordinates (Angstroms):  
 -----

C -4.095 -0.814 -0.000  
 C -4.408 0.546 -0.000  
 C -2.763 -1.226 -0.000  
 C -3.373 1.487 0.000  
 C -2.043 1.075 0.000  
 C -1.709 -0.294 0.000  
 H -4.888 -1.556 -0.000  
 H -5.443 0.872 -0.000  
 H -2.528 -2.287 -0.000  
 H -3.604 2.548 0.000  
 H -1.258 1.825 0.000  
 C -0.324 -0.792 0.000  
 C 0.807 -0.069 0.000  
 H -0.235 -1.879 0.000  
 C 2.197 -0.663 0.000  
 H 0.751 1.019 0.000  
 C 3.307 0.397 -0.000  
 H 2.324 -1.316 -0.875  
 H 2.324 -1.316 0.875  
 C 4.699 -0.199 0.000  
 H 3.183 1.049 0.876  
 H 3.183 1.049 -0.876  
 C 5.835 0.499 -0.000  
 H 4.756 -1.288 0.000  
 H 5.842 1.587 -0.000  
 H 6.804 0.008 -0.000

|                                              | 1         | 2           | 3                               |
|----------------------------------------------|-----------|-------------|---------------------------------|
|                                              | A         | A           | A                               |
| Frequencies --                               | -141.2770 | -90.3086    | 22.1662                         |
| Red. masses --                               | 1.9790    | 2.0314      | 2.7343                          |
| ZERO-POINT CORRECTION=                       |           |             | 0.222498 (HARTREE/<br>PARTICLE) |
| Thermal correction to Energy=                |           | 0.235410    |                                 |
| Thermal correction to Enthalpy=              |           | 0.236465    |                                 |
| Thermal correction to Gibbs Free Energy=     |           | 0.178360    |                                 |
| Sum of electronic and zero-point Energies=   |           | -465.467778 |                                 |
| Sum of electronic and thermal Energies=      |           | -465.454865 |                                 |
| Sum of electronic and thermal Enthalpies=    |           | -465.453810 |                                 |
| Sum of electronic and thermal Free Energies= |           | -465.511915 |                                 |

| ITEM          | VALUE    | THRESHOLD | CONVERGED? |
|---------------|----------|-----------|------------|
| MAXIMUM FORCE | 0.000055 | 0.000450  | YES        |
| RMS FORCE     | 0.000011 | 0.000300  | YES        |

---

**Structures and Energies from Figure 4**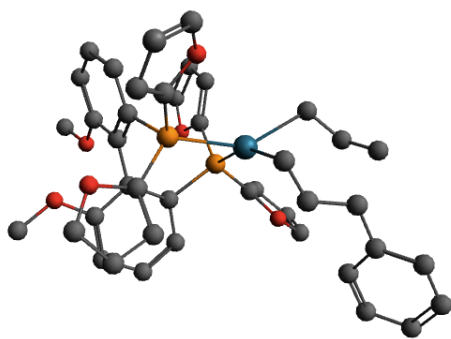**TS<sub>3,3'</sub> Si B**

-----  
 Cartesian coordinates (Angstroms):  
 -----

Pd 0.945 0.685 -0.920  
 P -1.135 1.797 -0.223  
 O -2.469 2.896 1.960  
 O -4.225 -2.335 0.364  
 O -0.996 3.438 -2.388  
 C -1.300 2.324 1.504  
 C -0.395 2.270 2.531  
 H 0.603 1.861 2.470  
 C -1.033 2.835 3.679  
 H -0.617 2.955 4.669  
 C -2.284 3.195 3.275  
 H -3.123 3.654 3.776  
 C -2.670 0.819 -0.583  
 C -2.921 -0.398 0.082  
 C -4.032 -1.176 -0.326  
 C -4.859 -0.758 -1.373  
 H -5.706 -1.356 -1.685  
 C -4.586 0.446 -2.022  
 H -5.230 0.774 -2.834  
 C -3.504 1.229 -1.637  
 H -3.310 2.162 -2.153  
 C -5.322 -3.167 0.006  
 H -6.280 -2.648 0.132  
 H -5.283 -4.020 0.684  
 H -5.236 -3.522 -1.028  
 C -1.421 3.382 -1.077  
 C -1.228 4.703 -2.837  
 H -0.949 4.897 -3.862  
 C -1.780 5.465 -1.852  
 H -2.062 6.506 -1.925  
 C -1.907 4.610 -0.712  
 H -2.316 4.866 0.254  
 P 0.079 -1.544 -0.444  
 O -1.617 -3.564 -1.323  
 O -3.936 -0.163 2.570  
 O 2.521 -2.441 0.365  
 C -0.996 -2.376 -1.644  
 C -1.296 -2.047 -2.939  
 H -0.959 -1.163 -3.461  
 C -2.144 -3.081 -3.446

H -2.577 -3.150 -4.434  
 C -2.305 -3.970 -2.425  
 H -2.850 -4.897 -2.326  
 C -0.866 -1.517 1.153  
 C -2.125 -0.891 1.256  
 C -2.716 -0.768 2.539  
 C -2.065 -1.241 3.682  
 H -2.518 -1.141 4.660  
 C -0.817 -1.849 3.556  
 H -0.310 -2.220 4.443  
 C -0.219 -1.988 2.309  
 H 0.753 -2.460 2.235  
 C -4.578 0.014 3.827  
 H -4.780 -0.947 4.316  
 H -5.524 0.513 3.611  
 H -3.981 0.644 4.496  
 C 1.324 -2.853 -0.181  
 C 3.341 -3.528 0.420  
 H 4.324 -3.351 0.827  
 C 2.709 -4.626 -0.082  
 H 3.120 -5.621 -0.168  
 C 1.402 -4.191 -0.469  
 H 0.615 -4.792 -0.899  
 C 2.217 -0.014 -2.742  
 C 2.222 2.500 -0.651  
 C 3.207 1.789 0.063  
 C 4.532 1.539 -0.371  
 H 2.926 1.408 1.045  
 C 3.499 -0.426 -2.368  
 C 4.594 0.430 -2.271  
 H 2.509 2.948 -1.603  
 H 1.508 3.093 -0.086  
 H 1.499 -0.774 -3.038  
 H 2.126 0.929 -3.283  
 C 5.484 0.821 0.500  
 H 4.986 2.329 -0.962  
 H 4.573 1.347 -2.854  
 H 5.584 0.020 -2.099  
 H 3.610 -1.439 -1.982  
 C 5.077 -0.217 1.363  
 C 6.853 1.150 0.476  
 C 7.774 0.488 1.287  
 C 5.996 -0.874 2.180  
 C 7.351 -0.527 2.149  
 H 7.193 1.944 -0.186  
 H 8.823 0.769 1.250  
 H 8.065 -1.044 2.784  
 H 4.034 -0.520 1.376  
 H 5.655 -1.665 2.843

|                                            | 1         | 2            | 3                               |
|--------------------------------------------|-----------|--------------|---------------------------------|
|                                            | A         | A            | A                               |
| Frequencies --                             | -399.6846 | 11.3389      | 20.3841                         |
| Red. masses --                             | 9.7657    | 5.9314       | 6.1455                          |
| ZERO-POINT CORRECTION=<br>PARTICLE)        |           |              | 0.694558 (HARTREE/<br>PARTICLE) |
| Thermal correction to Energy=              |           | 0.754052     |                                 |
| Thermal correction to Enthalpy=            |           | 0.755107     |                                 |
| Thermal correction to Gibbs Free Energy=   |           | 0.591602     |                                 |
| Sum of electronic and zero-point Energies= |           | -2883.298546 |                                 |
| Sum of electronic and thermal Energies=    |           | -2883.239051 |                                 |
| Sum of electronic and thermal Enthalpies=  |           | -2883.237996 |                                 |

Ardolino & Morken, Supporting Information

Sum of electronic and thermal Free Energies= -2883.401502

| ITEM          | VALUE    | THRESHOLD | CONVERGED? |
|---------------|----------|-----------|------------|
| MAXIMUM FORCE | 0.000004 | 0.000450  | YES        |
| RMS FORCE     | 0.000001 | 0.000300  | YES        |

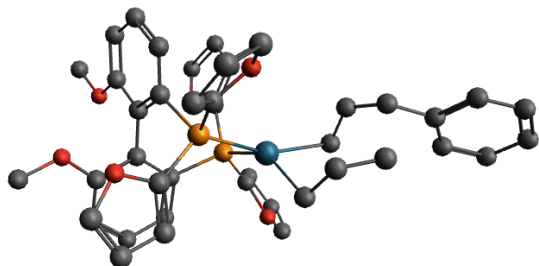

***trans*-TS<sub>3,3'</sub> Si B**

-----  
 Cartesian coordinates (Angstroms):  
 -----

Pd 1.113 -0.076 -0.426  
 P -0.481 1.787 -0.225  
 O -1.876 3.411 1.553  
 O -4.927 -0.880 -0.554  
 O 0.776 3.137 -2.231  
 C -0.884 2.464 1.408  
 C -0.312 2.220 2.628  
 H 0.486 1.517 2.822  
 C -0.981 3.055 3.577  
 H -0.793 3.125 4.638  
 C -1.917 3.751 2.871  
 H -2.654 4.491 3.143  
 C -2.107 1.377 -1.015  
 C -2.971 0.421 -0.444  
 C -4.129 0.039 -1.166  
 C -4.408 0.583 -2.423  
 H -5.292 0.285 -2.972  
 C -3.533 1.520 -2.972  
 H -3.750 1.946 -3.947  
 C -2.393 1.916 -2.282  
 H -1.727 2.644 -2.728  
 C -6.097 -1.326 -1.230  
 H -6.794 -0.501 -1.419  
 H -6.569 -2.049 -0.564  
 H -5.849 -1.817 -2.179  
 C 0.043 3.312 -1.076  
 C 1.129 4.373 -2.681  
 H 1.706 4.395 -3.592  
 C 0.655 5.338 -1.844  
 H 0.789 6.405 -1.951  
 C -0.050 4.653 -0.805  
 H -0.569 5.093 0.033  
 P -0.613 -1.759 -0.033  
 O -2.592 -3.316 -1.207  
 O -4.479 1.305 1.607  
 O 1.062 -3.179 1.573  
 C -1.578 -2.408 -1.425

C -1.476 -2.161 -2.769  
 H -0.780 -1.480 -3.236  
 C -2.475 -2.955 -3.415  
 H -2.685 -3.012 -4.473  
 C -3.119 -3.631 -2.421  
 H -3.932 -4.341 -2.412  
 C -1.869 -1.204 1.217  
 C -2.780 -0.169 0.923  
 C -3.619 0.310 1.959  
 C -3.546 -0.222 3.250  
 H -4.188 0.148 4.040  
 C -2.633 -1.240 3.519  
 H -2.576 -1.657 4.521  
 C -1.799 -1.728 2.519  
 H -1.096 -2.517 2.753  
 C -5.340 1.848 2.602  
 H -6.019 1.088 3.007  
 H -5.923 2.621 2.101  
 H -4.769 2.299 3.422  
 C 0.032 -3.314 0.666  
 C 1.466 -4.433 1.919  
 H 2.269 -4.487 2.638  
 C 0.734 -5.370 1.253  
 H 0.841 -6.443 1.329  
 C -0.197 -4.646 0.443  
 H -0.949 -5.058 -0.214  
 C 2.326 -1.493 -1.780  
 C 2.926 1.204 -0.030  
 C 3.442 0.328 0.947  
 C 4.617 -0.463 0.922  
 H 2.814 0.192 1.830  
 C 3.218 -2.296 -1.054  
 C 4.527 -1.927 -0.767  
 H 3.488 1.368 -0.947  
 H 2.377 2.078 0.307  
 H 1.449 -1.971 -2.210  
 H 2.756 -0.707 -2.401  
 H 4.660 -1.188 1.735  
 C 5.974 0.012 0.561  
 H 5.009 -1.198 -1.411  
 H 5.200 -2.637 -0.296  
 H 2.819 -3.190 -0.576  
 C 7.082 -0.750 0.991  
 C 6.251 1.189 -0.163  
 C 8.391 -0.370 0.705  
 C 7.562 1.571 -0.450  
 C 8.643 0.796 -0.024  
 H 9.662 1.098 -0.249  
 H 7.737 2.488 -1.007  
 H 6.903 -1.658 1.564  
 H 9.217 -0.983 1.055  
 H 5.436 1.823 -0.491

|                                 | 1         | 2        | 3                  |
|---------------------------------|-----------|----------|--------------------|
|                                 | A         | A        | A                  |
| Frequencies --                  | -390.5877 | 6.7309   | 13.9137            |
| Red. masses --                  | 8.1521    | 6.2623   | 6.0650             |
| ZERO-POINT CORRECTION=          |           |          | 0.694042 (HARTREE/ |
| PARTICLE)                       |           |          |                    |
| Thermal correction to Energy=   |           | 0.753819 |                    |
| Thermal correction to Enthalpy= |           | 0.754874 |                    |

*Ardolino & Morken, Supporting Information*

Thermal correction to Gibbs Free Energy= 0.588612  
 Sum of electronic and zero-point Energies= -2883.290207  
 Sum of electronic and thermal Energies= -2883.230430  
 Sum of electronic and thermal Enthalpies= -2883.229375  
 Sum of electronic and thermal Free Energies= -2883.395637

| ITEM          | VALUE    | THRESHOLD | CONVERGED? |
|---------------|----------|-----------|------------|
| MAXIMUM FORCE | 0.000012 | 0.000450  | YES        |
| RMS FORCE     | 0.000001 | 0.000300  | YES        |

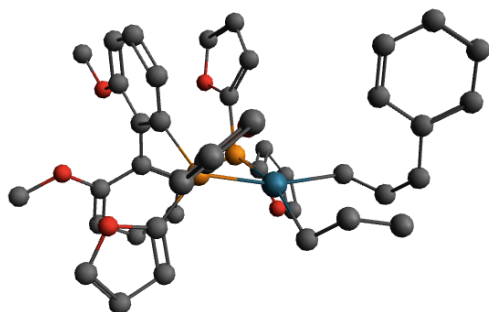

***trans-TS<sub>3,3'-Re a</sub>***

-----  
 Cartesian coordinates (Angstroms):  
 -----

Pd 1.172 0.032 -0.994  
 P -0.459 1.796 -0.386  
 O -1.570 3.176 1.762  
 O -4.717 -1.171 0.104  
 O 0.115 3.391 -2.531  
 C -0.551 2.351 1.337  
 C 0.318 2.136 2.374  
 H 1.209 1.527 2.334  
 C -0.188 2.861 3.498  
 H 0.239 2.918 4.489  
 C -1.332 3.467 3.070  
 H -2.055 4.111 3.548  
 C -2.173 1.253 -0.855  
 C -2.864 0.260 -0.134  
 C -4.100 -0.213 -0.643  
 C -4.626 0.285 -1.838  
 H -5.569 -0.079 -2.225  
 C -3.921 1.263 -2.539  
 H -4.328 1.653 -3.468  
 C -2.708 1.743 -2.060  
 H -2.177 2.498 -2.627  
 C -5.961 -1.692 -0.347  
 H -6.726 -0.909 -0.414  
 H -6.264 -2.428 0.398  
 H -5.859 -2.185 -1.322  
 C -0.302 3.416 -1.216  
 C 0.225 4.684 -2.949  
 H 0.539 4.823 -3.972  
 C -0.099 5.539 -1.939  
 H -0.096 6.618 -1.985  
 C -0.441 4.719 -0.817  
 H -0.763 5.052 0.159

P -0.336 -1.738 -0.141  
 O -2.394 -3.426 -0.964  
 O -4.073 1.054 2.148  
 O 1.668 -3.031 1.181  
 C -1.470 -2.477 -1.346  
 C -1.569 -2.270 -2.696  
 H -0.974 -1.574 -3.270  
 C -2.604 -3.132 -3.175  
 H -2.957 -3.233 -4.192  
 C -3.068 -3.805 -2.084  
 H -3.834 -4.552 -1.943  
 C -1.384 -1.255 1.312  
 C -2.405 -0.294 1.182  
 C -3.090 0.133 2.347  
 C -2.755 -0.375 3.605  
 H -3.278 -0.045 4.494  
 C -1.733 -1.317 3.712  
 H -1.472 -1.715 4.689  
 C -1.050 -1.755 2.583  
 H -0.258 -2.486 2.692  
 C -4.794 1.536 3.276  
 H -5.330 0.728 3.788  
 H -5.514 2.255 2.885  
 H -4.131 2.040 3.990  
 C 0.520 -3.238 0.446  
 C 2.193 -4.255 1.470  
 H 3.100 -4.251 2.055  
 C 1.423 -5.242 0.934  
 H 1.602 -6.305 1.001  
 C 0.337 -4.585 0.272  
 H -0.482 -5.050 -0.256  
 C 2.331 -1.593 -2.171  
 C 2.780 1.657 -1.218  
 C 3.983 1.265 -1.819  
 C 5.080 0.574 -1.268  
 H 4.050 1.421 -2.897  
 C 3.575 -1.927 -1.598  
 C 4.801 -1.403 -2.011  
 H 3.561 -2.551 -0.706  
 H 4.895 -1.062 -3.039  
 H 5.713 -1.823 -1.595  
 H 2.198 2.381 -1.780  
 H 2.780 1.819 -0.140  
 H 1.544 -2.336 -2.088  
 H 2.355 -1.100 -3.145  
 H 5.991 0.659 -1.858  
 C 5.357 0.426 0.180  
 C 4.377 0.075 1.130  
 C 6.676 0.609 0.642  
 C 7.001 0.473 1.991  
 C 4.704 -0.066 2.480  
 C 6.014 0.138 2.921  
 H 8.027 0.628 2.316  
 H 6.263 0.031 3.973  
 H 3.360 -0.115 0.803  
 H 3.929 -0.342 3.191  
 H 7.453 0.868 -0.073

|                                              | 1         | 2            | 3                  |
|----------------------------------------------|-----------|--------------|--------------------|
|                                              | A         | A            | A                  |
| Frequencies --                               | -409.1121 | 12.3309      | 17.7263            |
| Red. masses --                               | 10.9456   | 6.0559       | 5.8831             |
| ZERO-POINT CORRECTION=<br>PARTICLE)          |           |              | 0.695151 (HARTREE/ |
| Thermal correction to Energy=                |           | 0.754466     |                    |
| Thermal correction to Enthalpy=              |           | 0.755521     |                    |
| Thermal correction to Gibbs Free Energy=     |           | 0.592838     |                    |
| Sum of electronic and zero-point Energies=   |           | -2883.294600 |                    |
| Sum of electronic and thermal Energies=      |           | -2883.235284 |                    |
| Sum of electronic and thermal Enthalpies=    |           | -2883.234229 |                    |
| Sum of electronic and thermal Free Energies= |           | -2883.396913 |                    |

  

| ITEM          | VALUE    | THRESHOLD | CONVERGED? |
|---------------|----------|-----------|------------|
| MAXIMUM FORCE | 0.000028 | 0.000450  | YES        |
| RMS FORCE     | 0.000003 | 0.000300  | YES        |

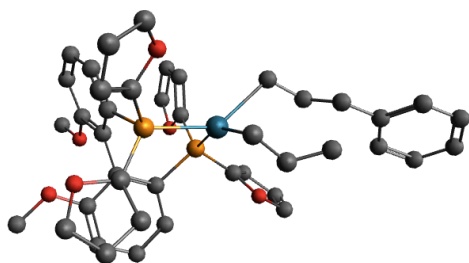TS<sub>3,3'</sub> Re b

-----  
 Cartesian coordinates (Angstroms):  
 -----

Pd 0.850 0.947 -0.219  
 P -1.427 1.774 -0.132  
 O -3.510 2.423 1.598  
 O -3.924 -2.722 -0.863  
 O -0.872 3.690 -1.987  
 C -2.181 2.071 1.490  
 C -1.618 2.049 2.738  
 H -0.591 1.798 2.961  
 C -2.647 2.405 3.666  
 H -2.563 2.487 4.740  
 C -3.768 2.617 2.921  
 H -4.781 2.899 3.166  
 C -2.601 0.665 -1.044  
 C -2.900 -0.627 -0.566  
 C -3.670 -1.490 -1.385  
 C -4.119 -1.080 -2.644  
 H -4.706 -1.743 -3.267  
 C -3.803 0.200 -3.099  
 H -4.153 0.521 -4.076  
 C -3.050 1.066 -2.314  
 H -2.813 2.054 -2.690  
 C -4.673 -3.651 -1.640  
 H -5.680 -3.277 -1.856  
 H -4.748 -4.554 -1.034  
 H -4.162 -3.888 -2.581  
 C -1.679 3.406 -0.905  
 C -1.161 4.958 -2.388

H -0.606 5.321 -3.239  
 C -2.124 5.503 -1.592  
 H -2.542 6.496 -1.676  
 C -2.462 4.498 -0.632  
 H -3.196 4.567 0.156  
 P 0.195 -1.410 -0.042  
 O -0.670 -3.719 -1.325  
 O -4.754 -0.707 1.389  
 O 2.282 -1.831 1.645  
 C -0.248 -2.416 -1.485  
 C -0.237 -2.107 -2.820  
 H 0.029 -1.151 -3.246  
 C -0.670 -3.276 -3.522  
 H -0.782 -3.396 -4.590  
 C -0.918 -4.217 -2.567  
 H -1.257 -5.241 -2.605  
 C -1.233 -1.603 1.132  
 C -2.517 -1.126 0.797  
 C -3.536 -1.175 1.780  
 C -3.280 -1.673 3.061  
 H -4.061 -1.704 3.810  
 C -2.001 -2.131 3.373  
 H -1.800 -2.520 4.367  
 C -0.985 -2.098 2.424  
 H 0.001 -2.460 2.689  
 C -5.821 -0.712 2.331  
 H -6.056 -1.727 2.670  
 H -6.683 -0.299 1.807  
 H -5.590 -0.083 3.200  
 C 1.495 -2.452 0.699  
 C 3.226 -2.729 2.042  
 H 3.915 -2.384 2.798  
 C 3.076 -3.906 1.371  
 H 3.686 -4.791 1.481  
 C 1.952 -3.729 0.503  
 H 1.528 -4.456 -0.172  
 C 2.598 0.574 -1.797  
 C 1.776 2.818 0.483  
 C 2.786 2.156 1.224  
 C 4.155 2.165 0.925  
 H 2.466 1.579 2.092  
 C 3.764 0.127 -1.196  
 C 4.828 0.970 -0.816  
 H 2.097 3.461 -0.338  
 H 0.922 3.213 1.030  
 H 1.959 -0.147 -2.297  
 H 2.579 1.581 -2.212  
 H 4.837 1.715 1.639  
 H 4.555 3.028 0.403  
 H 4.899 1.894 -1.382  
 C 6.130 0.461 -0.349  
 H 3.812 -0.925 -0.915  
 C 7.293 1.228 -0.560  
 C 6.276 -0.765 0.333  
 C 7.527 -1.205 0.763  
 C 8.544 0.790 -0.126  
 C 8.671 -0.433 0.537  
 H 9.422 1.404 -0.309

Ardolino & Morken, Supporting Information

H 9.644 -0.778 0.876  
H 5.402 -1.376 0.538  
H 7.609 -2.156 1.283  
H 7.209 2.179 -1.082

|                                              |           |              |                    |
|----------------------------------------------|-----------|--------------|--------------------|
|                                              | 1         | 2            | 3                  |
|                                              | A         | A            | A                  |
| Frequencies --                               | -383.4892 | 16.3957      | 18.4342            |
| Red. masses --                               | 10.4803   | 6.0149       | 5.9958             |
| ZERO-POINT CORRECTION=<br>PARTICLE)          |           |              | 0.693895 (HARTREE/ |
| Thermal correction to Energy=                |           | 0.753725     |                    |
| Thermal correction to Enthalpy=              |           | 0.754781     |                    |
| Thermal correction to Gibbs Free Energy=     |           | 0.589596     |                    |
| Sum of electronic and zero-point Energies=   |           | -2883.298986 |                    |
| Sum of electronic and thermal Energies=      |           | -2883.239155 |                    |
| Sum of electronic and thermal Enthalpies=    |           | -2883.238100 |                    |
| Sum of electronic and thermal Free Energies= |           | -2883.403285 |                    |

| ITEM          | VALUE    | THRESHOLD | CONVERGED? |
|---------------|----------|-----------|------------|
| MAXIMUM FORCE | 0.000000 | 0.000450  | YES        |
| RMS FORCE     | 0.000000 | 0.000300  | YES        |

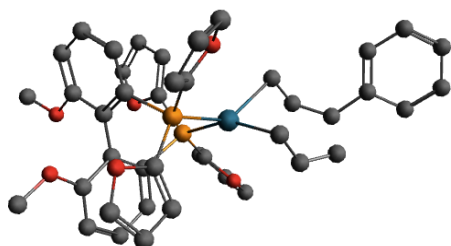

***trans-TS<sub>3,3'</sub> Re b***

-----  
Cartesian coordinates (Angstroms):  
-----

Pd -1.083 0.422 -0.175  
P 0.857 1.834 0.078  
O 2.915 3.090 -1.307  
O 4.425 -1.730 1.309  
O -0.515 3.471 1.771  
C 1.745 2.368 -1.411  
C 1.433 2.203 -2.734  
H 0.577 1.669 -3.119  
C 2.459 2.855 -3.488  
H 2.540 2.925 -4.563  
C 3.328 3.370 -2.573  
H 4.243 3.937 -2.656  
C 2.151 1.111 1.190  
C 2.875 -0.035 0.805  
C 3.747 -0.633 1.747  
C 3.881 -0.112 3.038  
H 4.546 -0.574 3.757  
C 3.146 1.016 3.400  
H 3.251 1.424 4.402  
C 2.287 1.625 2.492  
H 1.726 2.501 2.794  
C 5.321 -2.380 2.203  
H 6.127 -1.710 2.525  
H 5.749 -3.213 1.643

H 4.797 -2.769 3.084  
C 0.491 3.456 0.828  
C -0.684 4.763 2.166  
H -1.443 4.931 2.914  
C 0.178 5.582 1.499  
H 0.261 6.654 1.608  
C 0.941 4.736 0.633  
H 1.729 5.033 -0.042  
P 0.231 -1.679 -0.095  
O 1.581 -3.520 1.491  
O 4.921 0.425 -0.889  
O -1.398 -2.830 -1.949  
C 0.740 -2.428 1.476  
C 0.399 -2.105 2.763  
H -0.231 -1.280 3.061  
C 1.058 -3.043 3.617  
H 1.018 -3.090 4.696  
C 1.759 -3.873 2.794  
H 2.399 -4.725 2.968  
C 1.804 -1.450 -1.057  
C 2.839 -0.623 -0.576  
C 3.953 -0.375 -1.417  
C 4.026 -0.927 -2.699  
H 4.878 -0.733 -3.339  
C 2.985 -1.734 -3.157  
H 3.040 -2.164 -4.152  
C 1.883 -1.995 -2.350  
H 1.086 -2.624 -2.727  
C 6.059 0.734 -1.686  
H 6.620 -0.169 -1.956  
H 6.688 1.377 -1.070  
H 5.775 1.271 -2.598  
C -0.553 -3.119 -0.897  
C -1.939 -4.006 -2.372  
H -2.621 -3.938 -3.205  
C -1.476 -5.042 -1.617  
H -1.740 -6.085 -1.724  
C -0.577 -4.469 -0.663  
H -0.012 -4.989 0.096  
C -2.963 -0.418 1.083  
C -2.325 1.977 -1.073  
C -2.988 1.110 -1.984  
C -4.327 0.726 -1.883  
H -2.406 0.725 -2.821  
C -3.681 -1.237 0.227  
C -4.878 -0.961 -0.476  
H -2.940 2.462 -0.314  
H -1.550 2.626 -1.476  
H -2.210 -0.862 1.728  
H -3.380 0.521 1.435  
H -4.792 0.226 -2.727  
H -4.990 1.352 -1.298  
C -6.104 -0.340 0.064  
H -5.111 -1.700 -1.242  
H -3.176 -2.155 -0.070  
C -7.269 -0.355 -0.735  
C -6.213 0.249 1.341  
C -7.415 0.803 1.782



C -8.469 0.200 -0.295  
 C -8.551 0.790 0.970  
 H -9.484 1.223 1.318  
 H -9.344 0.168 -0.940  
 H -7.224 -0.815 -1.720  
 H -5.358 0.249 2.006  
 H -7.463 1.243 2.775

|                                              |           |              |                                 |
|----------------------------------------------|-----------|--------------|---------------------------------|
|                                              | 1         | 2            | 3                               |
|                                              | A         | A            | A                               |
| Frequencies --                               | -370.0475 | 14.7095      | 16.9664                         |
| Red. masses --                               | 8.6478    | 6.1878       | 5.7703                          |
| ZERO-POINT CORRECTION=                       |           |              | 0.694058 (HARTREE/<br>PARTICLE) |
| Thermal correction to Energy=                |           | 0.753819     |                                 |
| Thermal correction to Enthalpy=              |           | 0.754874     |                                 |
| Thermal correction to Gibbs Free Energy=     |           | 0.589810     |                                 |
| Sum of electronic and zero-point Energies=   |           | -2883.290741 |                                 |
| Sum of electronic and thermal Energies=      |           | -2883.230980 |                                 |
| Sum of electronic and thermal Enthalpies=    |           | -2883.229925 |                                 |
| Sum of electronic and thermal Free Energies= |           | -2883.394989 |                                 |

| ITEM          | VALUE    | THRESHOLD | CONVERGED? |
|---------------|----------|-----------|------------|
| MAXIMUM FORCE | 0.000001 | 0.000450  | YES        |
| RMS FORCE     | 0.000000 | 0.000300  | YES        |

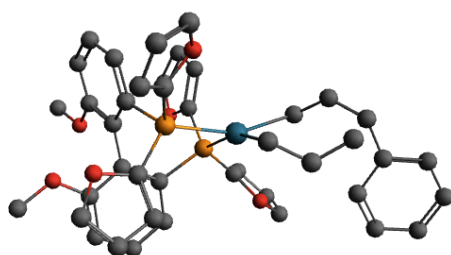

**TS<sub>3,3'</sub> Re c**

-----  
 Cartesian coordinates (Angstroms):  
 -----

Pd 1.087 0.717 -0.357  
 P -1.108 1.768 -0.073  
 O -2.930 2.642 1.838  
 O -4.278 -2.318 -0.593  
 O -0.524 3.626 -1.978  
 C -1.675 2.117 1.613  
 C -1.027 1.970 2.811  
 H -0.033 1.570 2.945  
 C -1.924 2.425 3.828  
 H -1.748 2.453 4.894  
 C -3.058 2.818 3.182  
 H -3.999 3.228 3.516  
 C -2.497 0.846 -0.883  
 C -2.927 -0.403 -0.390  
 C -3.901 -1.123 -1.127  
 C -4.420 -0.616 -2.322  
 H -5.162 -1.170 -2.883  
 C -3.972 0.616 -2.795  
 H -4.376 1.012 -3.723  
 C -3.020 1.343 -2.090

H -2.685 2.297 -2.477  
 C -5.252 -3.094 -1.282  
 H -6.206 -2.560 -1.369  
 H -5.396 -3.993 -0.681  
 H -4.904 -3.379 -2.282  
 C -1.220 3.435 -0.803  
 C -0.680 4.932 -2.335  
 H -0.191 5.231 -3.250  
 C -1.446 5.588 -1.420  
 H -1.727 6.631 -1.446  
 C -1.798 4.619 -0.428  
 H -2.411 4.774 0.448  
 P 0.105 -1.546 -0.209  
 O -1.294 -3.475 -1.643  
 O -4.559 -0.339 1.758  
 O 2.254 -2.535 1.147  
 C -0.621 -2.274 -1.702  
 C -0.585 -1.841 -3.002  
 H -0.134 -0.923 -3.349  
 C -1.271 -2.821 -3.786  
 H -1.440 -2.806 -4.853  
 C -1.679 -3.783 -2.912  
 H -2.225 -4.708 -3.026  
 C -1.217 -1.621 1.090  
 C -2.465 -0.991 0.910  
 C -3.371 -0.960 1.999  
 C -3.039 -1.533 3.230  
 H -3.734 -1.505 4.060  
 C -1.796 -2.145 3.387  
 H -1.537 -2.592 4.342  
 C -0.890 -2.189 2.334  
 H 0.072 -2.666 2.480  
 C -5.510 -0.253 2.813  
 H -5.828 -1.246 3.152  
 H -6.368 0.277 2.398  
 H -5.114 0.312 3.665  
 C 1.248 -2.885 0.269  
 C 3.032 -3.638 1.332  
 H 3.871 -3.514 1.999  
 C 2.563 -4.682 0.595  
 H 2.987 -5.675 0.544  
 C 1.407 -4.196 -0.094  
 H 0.767 -4.748 -0.765  
 C 2.879 -0.231 -1.452  
 C 1.996 2.720 0.213  
 C 3.341 2.617 0.640  
 C 4.445 2.887 -0.160  
 H 3.522 2.227 1.642  
 H 4.299 3.475 -1.062  
 H 5.425 2.978 0.297  
 C 3.831 0.701 -1.893  
 C 5.029 1.098 -1.279  
 H 3.567 1.269 -2.786  
 C 5.787 0.329 -0.265  
 H 5.679 1.691 -1.920  
 H 1.809 3.323 -0.675  
 H 1.275 2.896 1.009  
 H 3.190 -0.992 -0.743

H 2.202 -0.595 -2.223  
 C 7.190 0.261 -0.382  
 C 5.195 -0.315 0.841  
 C 7.968 -0.432 0.543  
 C 5.976 -1.003 1.772  
 C 7.364 -1.073 1.628  
 H 5.496 -1.478 2.624  
 H 7.966 -1.612 2.354  
 H 7.672 0.759 -1.220  
 H 9.047 -0.470 0.419  
 H 4.125 -0.250 0.990

|                                              | 1         | 2            | 3                  |
|----------------------------------------------|-----------|--------------|--------------------|
|                                              | A         | A            | A                  |
| Frequencies --                               | -368.6048 | 10.4918      | 20.0106            |
| Red. masses --                               | 11.3121   | 6.0004       | 5.8267             |
| ZERO-POINT CORRECTION=<br>PARTICLE)          |           |              | 0.694848 (HARTREE/ |
| Thermal correction to Energy=                |           | 0.754340     |                    |
| Thermal correction to Enthalpy=              |           | 0.755395     |                    |
| Thermal correction to Gibbs Free Energy=     |           | 0.591290     |                    |
| Sum of electronic and zero-point Energies=   |           | -2883.298581 |                    |
| Sum of electronic and thermal Energies=      |           | -2883.239090 |                    |
| Sum of electronic and thermal Enthalpies=    |           | -2883.238035 |                    |
| Sum of electronic and thermal Free Energies= |           | -2883.402139 |                    |

  

| ITEM          | VALUE    | THRESHOLD | CONVERGED? |
|---------------|----------|-----------|------------|
| MAXIMUM FORCE | 0.000009 | 0.000450  | YES        |
| RMS FORCE     | 0.000002 | 0.000300  | YES        |

C 1.501 -2.935 -2.644  
 H 2.130 -2.976 -3.521  
 C 0.583 -3.866 -2.258  
 H 0.262 -4.810 -2.674  
 C -1.879 -1.577 0.804  
 C -2.663 -1.058 -0.244  
 C -4.074 -1.067 -0.106  
 C -4.680 -1.576 1.047  
 H -5.758 -1.583 1.149  
 C -3.884 -2.076 2.075  
 H -4.353 -2.470 2.972  
 C -2.497 -2.076 1.964  
 H -1.901 -2.463 2.780  
 C -6.193 -0.519 -1.078  
 H -6.615 -1.527 -0.989  
 H -6.531 -0.068 -2.012  
 H -6.535 0.093 -0.236  
 C 0.477 -2.689 2.028  
 C 0.925 -3.312 4.097  
 H 0.992 -3.127 5.158  
 C 1.182 -4.395 3.313  
 H 1.537 -5.361 3.644  
 C 0.890 -3.994 1.970  
 H 0.964 -4.595 1.077  
 P -1.057 1.740 -0.160  
 O -3.726 2.470 0.026  
 O -2.878 -2.530 -2.505  
 O 0.506 3.623 -1.369  
 C -2.617 2.024 0.711  
 C -2.925 1.892 2.039  
 H -2.252 1.546 2.809  
 C -4.294 2.277 2.186  
 H -4.876 2.296 3.096  
 C -4.727 2.614 0.938  
 H -5.670 2.965 0.548  
 C -1.469 0.717 -1.654  
 C -2.097 -0.537 -1.530  
 C -2.263 -1.330 -2.693  
 C -1.812 -0.883 -3.938  
 H -1.941 -1.491 -4.825  
 C -1.186 0.359 -4.035  
 H -0.835 0.707 -5.002  
 C -1.010 1.154 -2.908  
 H -0.514 2.111 -3.008  
 C -3.086 -3.374 -3.631  
 H -3.723 -2.893 -4.383  
 H -3.589 -4.263 -3.249  
 H -2.136 -3.667 -4.094  
 C -0.753 3.396 -0.856  
 C 0.545 4.919 -1.789  
 H 1.478 5.244 -2.225  
 C -0.648 5.532 -1.553  
 H -0.899 6.559 -1.779  
 C -1.491 4.546 -0.949  
 H -2.516 4.669 -0.635  
 C 1.405 2.758 1.838  
 C 0.708 3.019 3.111  
 H 1.106 3.450 1.049

**Structures and Energies from Table 2**

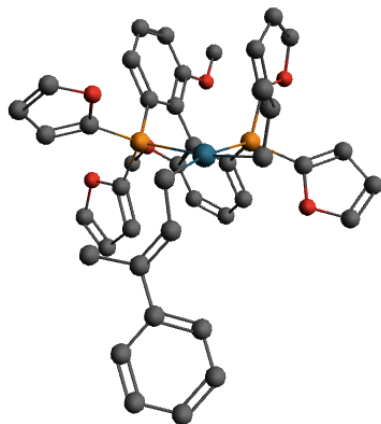

**GS 13**

-----  
 Cartesian coordinates (Angstroms):  
 -----

Pd 0.787 0.814 1.159  
 C 2.602 0.153 2.102  
 P -0.026 -1.457 0.783  
 O -0.030 -3.489 -1.103  
 O -4.772 -0.551 -1.154  
 O 0.500 -2.263 3.338  
 C 0.511 -2.275 -0.738  
 C 1.454 -1.901 -1.658  
 H 2.043 -0.996 -1.624

H 2.492 2.775 1.949  
 C 1.256 3.041 4.341  
 H -0.365 3.206 3.034  
 C 3.679 0.390 1.135  
 H 2.491 -0.885 2.413  
 H 2.668 0.798 2.980  
 C 4.423 -0.506 0.425  
 H 3.912 1.442 0.975  
 C 5.437 -0.036 -0.549  
 C 4.308 -2.001 0.627  
 C 6.549 -0.836 -0.888  
 C 5.334 1.218 -1.193  
 C 6.302 1.658 -2.093  
 C 7.518 -0.397 -1.792  
 C 7.406 0.856 -2.398  
 H 8.365 -1.038 -2.020  
 H 8.157 1.196 -3.105  
 H 6.669 -1.811 -0.428  
 H 4.468 1.845 -1.003  
 H 6.186 2.628 -2.571  
 H 0.657 3.221 5.229  
 H 2.322 2.884 4.493  
 H 4.270 -2.534 -0.330  
 H 3.413 -2.269 1.190  
 H 5.170 -2.403 1.179

|                                              | 1      | 2            | 3                               |
|----------------------------------------------|--------|--------------|---------------------------------|
|                                              | A      | A            | A                               |
| Frequencies --                               | 8.1110 | 10.2300      | 18.4193                         |
| Red. masses --                               | 6.1703 | 6.0706       | 6.0566                          |
| ZERO-POINT CORRECTION=<br>PARTICLE)          |        |              | 0.723508 (HARTREE/<br>PARTICLE) |
| Thermal correction to Energy=                |        | 0.785613     |                                 |
| Thermal correction to Enthalpy=              |        | 0.786668     |                                 |
| Thermal correction to Gibbs Free Energy=     |        | 0.615473     |                                 |
| Sum of electronic and zero-point Energies=   |        | -2922.610382 |                                 |
| Sum of electronic and thermal Energies=      |        | -2922.548277 |                                 |
| Sum of electronic and thermal Enthalpies=    |        | -2922.547222 |                                 |
| Sum of electronic and thermal Free Energies= |        | -2922.718418 |                                 |

  

| ITEM          | VALUE    | THRESHOLD | CONVERGED? |
|---------------|----------|-----------|------------|
| MAXIMUM FORCE | 0.000011 | 0.000450  | YES        |
| RMS FORCE     | 0.000001 | 0.000300  | YES        |

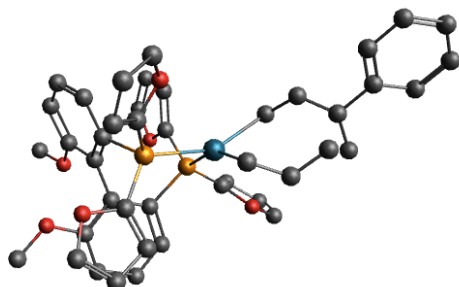

**TS<sub>3,3'</sub> 13**

-----  
 Cartesian coordinates (Angstroms):

-----  
 Pd -0.958 0.228 -0.215  
 P 0.534 -1.730 -0.064  
 O 1.995 -3.392 1.622  
 O 5.065 0.695 -0.864  
 O -0.974 -3.071 -1.894  
 C 1.062 -2.380 1.544  
 C 0.652 -2.049 2.809  
 H -0.063 -1.278 3.059  
 C 1.364 -2.896 3.714  
 H 1.293 -2.912 4.792  
 C 2.162 -3.685 2.941  
 H 2.871 -4.469 3.163  
 C 2.099 -1.413 -1.011  
 C 3.065 -0.500 -0.541  
 C 4.166 -0.190 -1.379  
 C 4.292 -0.764 -2.647  
 H 5.134 -0.523 -3.284  
 C 3.319 -1.658 -3.093  
 H 3.417 -2.107 -4.077  
 C 2.232 -1.981 -2.289  
 H 1.487 -2.676 -2.657  
 C 6.175 1.083 -1.666  
 H 6.813 0.227 -1.915  
 H 6.744 1.792 -1.064  
 H 5.848 1.573 -2.591  
 C -0.123 -3.253 -0.823  
 C -1.405 -4.302 -2.286  
 H -2.080 -4.319 -3.127  
 C -0.866 -5.270 -1.493  
 H -1.038 -6.335 -1.570  
 C -0.034 -4.593 -0.547  
 H 0.563 -5.038 0.235  
 P 0.882 1.803 0.035  
 O 2.811 3.261 -1.340  
 O 4.725 -1.423 1.378  
 O -0.652 3.314 1.698  
 C 1.744 2.394 -1.447  
 C 1.503 2.139 -2.772  
 H 0.736 1.483 -3.157  
 C 2.466 2.884 -3.522  
 H 2.575 2.921 -4.596  
 C 3.230 3.541 -2.605  
 H 4.069 4.216 -2.684  
 C 2.215 1.208 1.178  
 C 3.040 0.121 0.824  
 C 3.952 -0.378 1.787  
 C 4.031 0.183 3.065  
 H 4.727 -0.203 3.798  
 C 3.198 1.251 3.396  
 H 3.259 1.689 4.388  
 C 2.296 1.761 2.468  
 H 1.659 2.592 2.746  
 C 5.671 -1.968 2.290  
 H 6.412 -1.221 2.597  
 H 6.174 -2.773 1.753  
 H 5.181 -2.380 3.180  
 C 0.360 3.390 0.764

C -0.946 4.586 2.084  
H -1.724 4.685 2.825  
C -0.161 5.479 1.419  
H -0.181 6.555 1.521  
C 0.687 4.705 0.565  
H 1.449 5.073 -0.105  
C -2.163 1.837 -1.205  
C -2.691 -1.104 0.620  
C -3.939 -0.485 0.707  
C -4.974 -0.556 -0.252  
H -4.102 0.160 1.569  
C -4.863 -1.632 -1.318  
C -6.347 -0.156 0.181  
C -3.206 1.227 -1.942  
C -4.534 1.186 -1.527  
H -2.936 0.716 -2.867  
H -4.858 1.893 -0.771  
H -5.303 0.901 -2.240  
H -2.576 -1.961 -0.035  
H -2.125 -1.169 1.548  
H -2.459 2.521 -0.409  
H -1.328 2.207 -1.798  
H -5.039 -2.634 -0.903  
H -3.865 -1.629 -1.761  
H -5.581 -1.479 -2.129  
C -6.565 0.937 1.049  
C -7.488 -0.854 -0.261  
C -8.773 -0.489 0.149  
C -7.845 1.301 1.459  
C -8.963 0.590 1.012  
H -9.627 -1.058 -0.209  
H -9.962 0.875 1.329  
H -7.377 -1.706 -0.922  
H -5.719 1.520 1.402  
H -7.971 2.150 2.126

|                                              | 1         | 2            | 3                  |
|----------------------------------------------|-----------|--------------|--------------------|
|                                              | A         | A            | A                  |
| Frequencies --                               | -362.1616 | 10.8408      | 14.3521            |
| Red. masses --                               | 10.1572   | 6.0517       | 6.3391             |
| ZERO-POINT CORRECTION=                       |           |              | 0.722591 (HARTREE/ |
| PARTICLE)                                    |           |              |                    |
| Thermal correction to Energy=                |           | 0.783915     |                    |
| Thermal correction to Enthalpy=              |           | 0.784970     |                    |
| Thermal correction to Gibbs Free Energy=     |           | 0.616842     |                    |
| Sum of electronic and zero-point Energies=   |           | -2922.587111 |                    |
| Sum of electronic and thermal Energies=      |           | -2922.525787 |                    |
| Sum of electronic and thermal Enthalpies=    |           | -2922.524732 |                    |
| Sum of electronic and thermal Free Energies= |           | -2922.692860 |                    |

| ITEM          | VALUE    | THRESHOLD | CONVERGED? |
|---------------|----------|-----------|------------|
| MAXIMUM FORCE | 0.000000 | 0.000450  | YES        |
| RMS FORCE     | 0.000000 | 0.000300  | YES        |

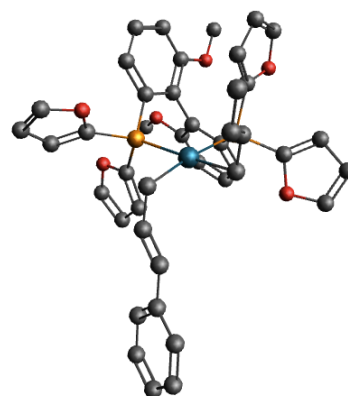

GS 14

-----  
Cartesian coordinates (Angstroms):  
-----

Pd 0.970 0.841 0.695  
C 2.713 0.301 1.837  
P -0.151 -1.309 1.111  
O -0.524 -3.793 -0.065  
O -4.915 -0.320 -0.732  
O 0.479 -1.445 3.768  
C 0.147 -2.592 -0.128  
C 1.019 -2.613 -1.184  
H 1.668 -1.803 -1.482  
C 0.880 -3.892 -1.809  
H 1.410 -4.260 -2.676  
C -0.066 -4.561 -1.092  
H -0.503 -5.545 -1.174  
C -1.994 -1.150 1.276  
C -2.808 -0.857 0.166  
C -4.185 -0.598 0.383  
C -4.729 -0.633 1.670  
H -5.781 -0.437 1.833  
C -3.902 -0.921 2.755  
H -4.323 -0.949 3.756  
C -2.548 -1.174 2.568  
H -1.926 -1.385 3.428  
C -6.306 -0.055 -0.589  
H -6.837 -0.912 -0.159  
H -6.679 0.131 -1.597  
H -6.483 0.831 0.032  
C 0.331 -2.202 2.625  
C 0.887 -2.285 4.761  
H 1.041 -1.830 5.727  
C 1.014 -3.556 4.288  
H 1.326 -4.424 4.850  
C 0.653 -3.504 2.904  
H 0.623 -4.328 2.207  
P -0.845 1.538 -0.788  
O -3.374 2.667 -0.666  
O -3.450 -2.915 -1.458  
O 0.774 2.665 -2.677  
C -2.243 2.329 0.043  
C -2.388 2.725 1.347

H -1.661 2.583 2.132  
 C -3.675 3.339 1.451  
 H -4.129 3.767 2.333  
 C -4.226 3.274 0.205  
 H -5.168 3.600 -0.208  
 C -1.552 0.169 -1.823  
 C -2.321 -0.863 -1.252  
 C -2.712 -1.951 -2.073  
 C -2.347 -2.003 -3.421  
 H -2.649 -2.834 -4.046  
 C -1.581 -0.972 -3.962  
 H -1.295 -1.011 -5.009  
 C -1.180 0.103 -3.176  
 H -0.576 0.884 -3.618  
 C -3.866 -4.045 -2.218  
 H -4.515 -3.754 -3.053  
 H -4.427 -4.677 -1.529  
 H -3.006 -4.605 -2.605  
 C -0.425 2.817 -2.016  
 C 0.920 3.740 -3.504  
 H 1.822 3.756 -4.097  
 C -0.145 4.580 -3.385  
 H -0.293 5.509 -3.915  
 C -1.019 3.983 -2.422  
 H -1.971 4.362 -2.082  
 C 1.951 2.738 0.552  
 C 1.531 3.587 1.684  
 H 1.636 3.148 -0.409  
 H 3.026 2.553 0.532  
 C 2.282 3.960 2.739  
 H 0.496 3.940 1.658  
 C 3.651 -0.344 0.916  
 H 2.328 -0.380 2.596  
 H 3.103 1.207 2.302  
 C 4.797 0.197 0.427  
 H 3.377 -1.350 0.595  
 C 5.725 -0.408 -0.530  
 H 5.082 1.189 0.779  
 C 6.907 0.286 -0.870  
 C 5.516 -1.663 -1.144  
 C 6.441 -2.190 -2.041  
 C 7.831 -0.242 -1.770  
 C 7.606 -1.486 -2.363  
 H 8.730 0.321 -2.008  
 H 8.324 -1.900 -3.065  
 H 7.094 1.256 -0.414  
 H 4.618 -2.231 -0.919  
 H 6.250 -3.159 -2.497  
 C 1.800 4.804 3.885  
 H 3.325 3.640 2.779  
 H 2.396 5.721 3.995  
 H 1.877 4.272 4.844  
 H 0.754 5.099 3.751

|                        |        |         |                    |
|------------------------|--------|---------|--------------------|
|                        | 1      | 2       | 3                  |
|                        | A      | A       | A                  |
| Frequencies --         | 7.7735 | 12.1856 | 17.2224            |
| Red. masses --         | 6.0466 | 5.9485  | 6.0012             |
| ZERO-POINT CORRECTION= |        |         | 0.723520 (HARTREE/ |
| PARTICLE)              |        |         |                    |

Thermal correction to Energy= 0.785765  
 Thermal correction to Enthalpy= 0.786820  
 Thermal correction to Gibbs Free Energy= 0.613584  
 Sum of electronic and zero-point Energies= -2922.616194  
 Sum of electronic and thermal Energies= -2922.553950  
 Sum of electronic and thermal Enthalpies= -2922.552895  
 Sum of electronic and thermal Free Energies= -2922.726130

| ITEM          | VALUE    | THRESHOLD | CONVERGED? |
|---------------|----------|-----------|------------|
| MAXIMUM FORCE | 0.000003 | 0.000450  | YES        |
| RMS FORCE     | 0.000000 | 0.000300  | YES        |

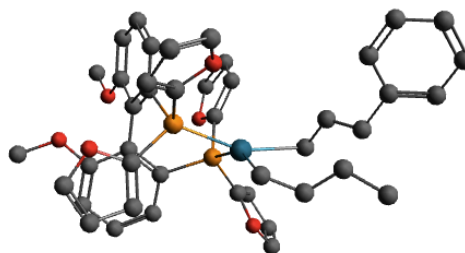

**TS<sub>3,3'</sub> 14**

-----  
 Cartesian coordinates (Angstroms):  
 -----

Pd 0.945 0.283 -0.641  
 P -0.927 1.807 -0.210  
 O -2.296 3.161 1.799  
 O -4.856 -1.591 -0.107  
 O -0.145 3.397 -2.276  
 C -1.214 2.364 1.492  
 C -0.474 2.153 2.626  
 H 0.425 1.557 2.690  
 C -1.130 2.852 3.687  
 H -0.828 2.904 4.724  
 C -2.226 3.440 3.130  
 H -3.016 4.062 3.523  
 C -2.559 1.149 -0.797  
 C -3.157 0.034 -0.176  
 C -4.325 -0.518 -0.757  
 C -4.873 0.022 -1.925  
 H -5.765 -0.403 -2.368  
 C -4.260 1.120 -2.526  
 H -4.686 1.542 -3.431  
 C -3.113 1.681 -1.974  
 H -2.651 2.533 -2.457  
 C -6.030 -2.196 -0.636  
 H -6.870 -1.492 -0.663  
 H -6.271 -3.018 0.039  
 H -5.857 -2.594 -1.643  
 C -0.776 3.419 -1.050  
 C -0.066 4.683 -2.716  
 H 0.404 4.824 -3.677  
 C -0.618 5.534 -1.806  
 H -0.688 6.609 -1.889  
 C -1.080 4.715 -0.727  
 H -1.581 5.042 0.172  
 P -0.404 -1.693 -0.202

O -2.307 -3.405 -1.282  
 O -4.496 0.545 2.109  
 O 1.675 -2.984 0.998  
 C -1.433 -2.370 -1.534  
 C -1.486 -2.050 -2.865  
 H -0.920 -1.268 -3.350  
 C -2.439 -2.929 -3.468  
 H -2.738 -2.961 -4.505  
 C -2.904 -3.725 -2.463  
 H -3.623 -4.529 -2.425  
 C -1.559 -1.417 1.224  
 C -2.674 -0.562 1.114  
 C -3.429 -0.284 2.282  
 C -3.077 -0.834 3.518  
 H -3.656 -0.617 4.407  
 C -1.964 -1.670 3.603  
 H -1.689 -2.099 4.562  
 C -1.209 -1.960 2.473  
 H -0.345 -2.607 2.563  
 C -5.281 0.892 3.244  
 H -5.748 0.010 3.698  
 H -6.060 1.561 2.875  
 H -4.683 1.415 3.999  
 C 0.516 -3.193 0.279  
 C 2.245 -4.203 1.213  
 H 3.167 -4.198 1.775  
 C 1.495 -5.187 0.645  
 H 1.710 -6.246 0.653  
 C 0.374 -4.535 0.041  
 H -0.441 -4.999 -0.494  
 C 2.306 -0.985 -1.985  
 C 2.428 1.957 -0.235  
 C 3.484 1.250 0.360  
 C 4.755 1.049 -0.226  
 H 3.314 0.842 1.355  
 C 3.420 -0.280 -2.455  
 C 4.699 -0.349 -1.889  
 H 3.262 0.444 -3.258  
 H 4.883 -1.202 -1.237  
 C 5.898 0.114 -2.686  
 H 2.627 2.486 -1.166  
 H 1.756 2.487 0.434  
 H 2.496 -1.858 -1.363  
 H 1.469 -1.097 -2.674  
 C 5.850 0.492 0.599  
 H 5.070 1.822 -0.922  
 C 5.641 -0.600 1.467  
 C 6.677 -1.110 2.246  
 C 7.959 -0.555 2.174  
 C 7.149 1.033 0.534  
 C 8.189 0.518 1.310  
 H 9.179 0.962 1.244  
 H 8.767 -0.957 2.778  
 H 4.655 -1.053 1.518  
 H 6.487 -1.952 2.908  
 H 7.336 1.880 -0.121  
 H 6.757 0.339 -2.046  
 H 5.663 1.011 -3.270

H 6.221 -0.661 -3.394

|                                              | 1         | 2            | 3                  |
|----------------------------------------------|-----------|--------------|--------------------|
|                                              | A         | A            | A                  |
| Frequencies --                               | -391.4001 | 8.9269       | 13.0622            |
| Red. masses --                               | 9.0631    | 6.1003       | 6.2120             |
| ZERO-POINT CORRECTION=<br>PARTICLE)          |           |              | 0.722280 (HARTREE/ |
| Thermal correction to Energy=                |           | 0.783724     |                    |
| Thermal correction to Enthalpy=              |           | 0.784779     |                    |
| Thermal correction to Gibbs Free Energy=     |           | 0.615855     |                    |
| Sum of electronic and zero-point Energies=   |           | -2922.592023 |                    |
| Sum of electronic and thermal Energies=      |           | -2922.530580 |                    |
| Sum of electronic and thermal Enthalpies=    |           | -2922.529525 |                    |
| Sum of electronic and thermal Free Energies= |           | -2922.698448 |                    |

| ITEM          | VALUE    | THRESHOLD | CONVERGED? |
|---------------|----------|-----------|------------|
| MAXIMUM FORCE | 0.000018 | 0.000450  | YES        |
| RMS FORCE     | 0.000002 | 0.000300  | YES        |

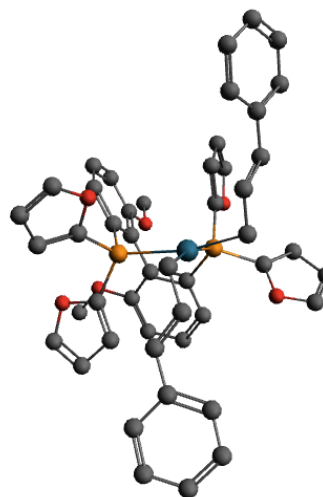

**GS 15**

-----  
 Cartesian coordinates (Angstroms):  
 -----

Pd 0.011 -1.321 0.018  
 C 0.985 -2.916 -1.044  
 P 0.751 0.372 -1.579  
 O 2.754 2.191 -2.158  
 O -1.598 4.581 0.369  
 O -0.137 -1.075 -3.719  
 C 2.392 1.106 -1.389  
 C 3.448 0.735 -0.600  
 H 3.456 -0.092 0.096  
 C 4.519 1.636 -0.894  
 H 5.507 1.644 -0.457  
 C 4.042 2.494 -1.839  
 H 4.471 3.333 -2.366  
 C -0.441 1.791 -1.663  
 C -0.538 2.728 -0.616  
 C -1.558 3.709 -0.676  
 C -2.455 3.750 -1.747

H -3.233 4.502 -1.790  
 C -2.345 2.807 -2.768  
 H -3.042 2.836 -3.600  
 C -1.353 1.833 -2.731  
 H -1.295 1.106 -3.532  
 C -2.609 5.583 0.382  
 H -2.522 6.257 -0.478  
 H -2.453 6.151 1.300  
 H -3.611 5.139 0.397  
 C 0.847 -0.205 -3.305  
 C 0.142 -1.418 -5.008  
 H -0.553 -2.099 -5.475  
 C 1.280 -0.799 -5.430  
 H 1.740 -0.891 -6.404  
 C 1.738 -0.011 -4.327  
 H 2.609 0.627 -4.297  
 P -0.729 0.394 1.595  
 O -2.801 2.106 2.253  
 O 1.342 4.668 -0.513  
 O 0.324 -1.000 3.688  
 C -2.412 1.044 1.464  
 C -3.468 0.637 0.694  
 H -3.456 -0.180 -0.012  
 C -4.569 1.489 1.022  
 H -5.566 1.459 0.607  
 C -4.107 2.357 1.966  
 H -4.560 3.171 2.512  
 C 0.380 1.882 1.623  
 C 0.415 2.783 0.540  
 C 1.363 3.835 0.562  
 C 2.252 3.978 1.632  
 H 2.976 4.784 1.647  
 C 2.206 3.069 2.688  
 H 2.896 3.179 3.519  
 C 1.284 2.028 2.688  
 H 1.270 1.332 3.518  
 C 2.261 5.753 -0.555  
 H 2.109 6.443 0.284  
 H 2.063 6.276 -1.491  
 H 3.299 5.400 -0.551  
 C -0.715 -0.172 3.326  
 C 0.131 -1.345 4.992  
 H 0.877 -1.995 5.422  
 C -1.005 -0.769 5.474  
 H -1.406 -0.873 6.473  
 C -1.555 -0.006 4.395  
 H -2.450 0.597 4.411  
 C -0.961 -2.903 1.105  
 C -2.138 -3.244 0.303  
 H -1.214 -2.558 2.109  
 H -0.225 -3.708 1.155  
 C -3.424 -2.937 0.613  
 H -1.942 -3.783 -0.624  
 C 2.183 -3.212 -0.255  
 H 1.209 -2.592 -2.061  
 H 0.267 -3.738 -1.059  
 C 3.455 -2.874 -0.589  
 H 2.015 -3.744 0.682

C 4.670 -3.122 0.188  
 C 5.924 -2.815 -0.385  
 C 4.671 -3.658 1.495  
 C 5.861 -3.883 2.181  
 C 7.115 -3.038 0.304  
 C 7.094 -3.577 1.592  
 H 8.063 -2.792 -0.168  
 H 8.019 -3.752 2.132  
 H 5.953 -2.399 -1.389  
 H 3.729 -3.895 1.981  
 H 5.829 -4.297 3.186  
 C -4.620 -3.223 -0.181  
 C -5.890 -2.944 0.368  
 C -4.585 -3.765 -1.485  
 C -7.064 -3.199 -0.338  
 C -5.758 -4.022 -2.190  
 C -7.007 -3.743 -1.624  
 H -5.946 -2.522 1.369  
 H -7.919 -3.943 -2.179  
 H -8.025 -2.973 0.116  
 H -3.630 -3.981 -1.955  
 H -5.699 -4.440 -3.192  
 H 3.613 -2.372 -1.543  
 H -3.610 -2.429 1.559

|                                              | 1      | 2            | 3                  |
|----------------------------------------------|--------|--------------|--------------------|
|                                              | A      | A            | A                  |
| Frequencies --                               | 7.6804 | 13.8369      | 14.2759            |
| Red. masses --                               | 6.3645 | 6.0458       | 6.1045             |
| ZERO-POINT CORRECTION=<br>PARTICLE)          |        |              | 0.776603 (HARTREE/ |
| Thermal correction to Energy=                |        | 0.842697     |                    |
| Thermal correction to Enthalpy=              |        | 0.843752     |                    |
| Thermal correction to Gibbs Free Energy=     |        | 0.661198     |                    |
| Sum of electronic and zero-point Energies=   |        | -3114.310616 |                    |
| Sum of electronic and thermal Energies=      |        | -3114.244522 |                    |
| Sum of electronic and thermal Enthalpies=    |        | -3114.243467 |                    |
| Sum of electronic and thermal Free Energies= |        | -3114.426022 |                    |

| ITEM          | VALUE    | THRESHOLD | CONVERGED? |
|---------------|----------|-----------|------------|
| MAXIMUM FORCE | 0.000015 | 0.000450  | YES        |
| RMS FORCE     | 0.000002 | 0.000300  | YES        |

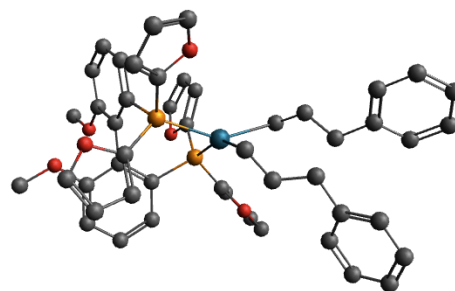TS<sub>3,3'</sub> 15

-----  
 Cartesian coordinates (Angstroms):  
 -----

Pd 0.488 0.305 -0.207  
 P -1.382 1.817 0.173  
 O -3.013 2.909 2.144

*Ardolino & Morken, Supporting Information*

O -5.344 -1.356 -0.925  
O -0.209 3.676 -1.429  
C -1.932 2.095 1.880  
C -1.422 1.628 3.063  
H -0.583 0.955 3.165  
C -2.223 2.180 4.110  
H -2.111 2.026 5.174  
C -3.170 2.945 3.496  
H -3.986 3.551 3.859  
C -2.917 1.354 -0.759  
C -3.618 0.170 -0.452  
C -4.705 -0.207 -1.279  
C -5.071 0.568 -2.384  
H -5.901 0.276 -3.017  
C -4.357 1.729 -2.674  
H -4.642 2.333 -3.531  
C -3.288 2.122 -1.875  
H -2.747 3.029 -2.116  
C -6.439 -1.799 -1.717  
H -7.254 -1.065 -1.727  
H -6.791 -2.721 -1.251  
H -6.129 -2.011 -2.747  
C -1.055 3.532 -0.349  
C -0.040 5.010 -1.639  
H 0.601 5.280 -2.465  
C -0.744 5.731 -0.721  
H -0.788 6.808 -0.645  
C -1.404 4.774 0.113  
H -2.061 4.975 0.945  
P -0.928 -1.651 -0.457  
O -2.695 -3.000 -2.125  
O -5.241 0.305 1.697  
O 0.978 -3.260 0.644  
C -1.772 -1.980 -2.029  
C -1.626 -1.390 -3.257  
H -0.982 -0.553 -3.484  
C -2.499 -2.077 -4.157  
H -2.646 -1.878 -5.209  
C -3.121 -3.038 -3.417  
H -3.854 -3.796 -3.649  
C -2.266 -1.606 0.826  
C -3.332 -0.686 0.747  
C -4.234 -0.601 1.837  
C -4.073 -1.402 2.972  
H -4.765 -1.332 3.802  
C -3.008 -2.300 3.030  
H -2.882 -2.925 3.909  
C -2.110 -2.403 1.974  
H -1.288 -3.106 2.041  
C -6.179 0.452 2.757  
H -6.724 -0.480 2.947  
H -6.882 1.219 2.429  
H -5.690 0.782 3.681  
C -0.125 -3.267 -0.186  
C 1.465 -4.531 0.682  
H 2.336 -4.682 1.301  
C 0.716 -5.354 -0.103  
H 0.876 -6.411 -0.266

C -0.315 -4.537 -0.665  
H -1.104 -4.846 -1.333  
C 2.026 -0.653 -1.718  
C 1.907 1.684 0.899  
C 2.797 0.707 1.357  
C 4.150 0.585 0.933  
H 2.445 0.028 2.132  
C 3.169 0.128 -1.779  
C 4.358 -0.159 -1.064  
H 3.125 1.047 -2.362  
H 4.449 -1.192 -0.732  
C 5.642 0.449 -1.477  
H 2.280 2.454 0.226  
H 1.143 2.030 1.590  
H 2.106 -1.661 -1.318  
H 1.268 -0.513 -2.485  
C 5.056 -0.306 1.692  
H 4.611 1.519 0.620  
C 4.642 -1.578 2.137  
C 5.502 -2.402 2.862  
C 6.805 -1.984 3.154  
C 6.375 0.091 1.981  
C 7.236 -0.733 2.706  
H 8.246 -0.396 2.923  
H 7.474 -2.627 3.718  
H 3.639 -1.923 1.903  
H 5.157 -3.377 3.197  
H 6.719 1.064 1.641  
C 5.740 1.790 -1.901  
C 6.827 -0.309 -1.435  
C 8.052 0.237 -1.822  
C 8.127 1.563 -2.255  
C 6.962 2.336 -2.289  
H 9.079 1.990 -2.556  
H 7.007 3.372 -2.615  
H 6.780 -1.343 -1.104  
H 8.948 -0.376 -1.786  
H 4.850 2.413 -1.922

|                                              | 1         | 2            | 3                  |
|----------------------------------------------|-----------|--------------|--------------------|
|                                              | A         | A            | A                  |
| Frequencies --                               | -370.6500 | 8.9657       | 13.0828            |
| Red. masses --                               | 10.9148   | 6.0021       | 5.9060             |
| ZERO-POINT CORRECTION=                       |           |              | 0.775519 (HARTREE/ |
| PARTICLE)                                    |           |              |                    |
| Thermal correction to Energy=                |           | 0.840993     |                    |
| Thermal correction to Enthalpy=              |           | 0.842048     |                    |
| Thermal correction to Gibbs Free Energy=     |           | 0.662960     |                    |
| Sum of electronic and zero-point Energies=   |           | -3114.281630 |                    |
| Sum of electronic and thermal Energies=      |           | -3114.216156 |                    |
| Sum of electronic and thermal Enthalpies=    |           | -3114.215101 |                    |
| Sum of electronic and thermal Free Energies= |           | -3114.394189 |                    |

| ITEM          | VALUE    | THRESHOLD | CONVERGED? |
|---------------|----------|-----------|------------|
| MAXIMUM FORCE | 0.000020 | 0.000450  | YES        |
| RMS FORCE     | 0.000002 | 0.000300  | YES        |



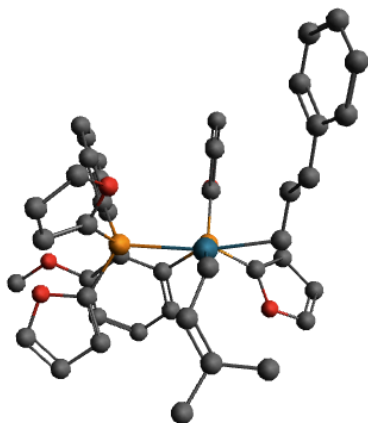

**GS 16**

-----  
 Cartesian coordinates (Angstroms):  
 -----

Pd 1.027 0.481 0.724  
 C 2.636 -0.469 1.810  
 P -0.530 -1.357 1.218  
 O -1.274 -3.904 0.413  
 O -4.850 0.219 -1.194  
 O -0.051 -1.132 3.890  
 C -0.400 -2.858 0.215  
 C 0.490 -3.191 -0.772  
 H 1.279 -2.556 -1.149  
 C 0.152 -4.510 -1.207  
 H 0.639 -5.092 -1.975  
 C -0.922 -4.890 -0.458  
 H -1.521 -5.787 -0.420  
 C -2.322 -0.874 1.184  
 C -2.960 -0.551 -0.029  
 C -4.291 -0.068 0.013  
 C -4.959 0.095 1.230  
 H -5.976 0.465 1.260  
 C -4.303 -0.222 2.419  
 H -4.821 -0.096 3.365  
 C -2.997 -0.701 2.404  
 H -2.507 -0.937 3.340  
 C -6.189 0.702 -1.229  
 H -6.891 -0.027 -0.806  
 H -6.422 0.856 -2.283  
 H -6.287 1.653 -0.693  
 C -0.310 -2.044 2.890  
 C 0.131 -1.836 5.042  
 H 0.340 -1.249 5.923  
 C 0.005 -3.172 4.810  
 H 0.105 -3.964 5.538  
 C -0.283 -3.309 3.415  
 H -0.457 -4.225 2.870  
 P -0.543 1.429 -0.901  
 O -2.893 2.876 -1.154  
 O -3.747 -2.619 -1.576  
 O 1.406 2.165 -2.673  
 C -1.887 2.482 -0.299

C -2.086 3.052 0.931  
 H -1.448 2.925 1.793  
 C -3.278 3.836 0.835  
 H -3.740 4.424 1.614  
 C -3.723 3.690 -0.445  
 H -4.571 4.082 -0.986  
 C -1.344 0.095 -1.914  
 C -2.331 -0.753 -1.374  
 C -2.799 -1.836 -2.159  
 C -2.295 -2.065 -3.443  
 H -2.656 -2.892 -4.040  
 C -1.314 -1.217 -3.954  
 H -0.921 -1.394 -4.951  
 C -0.836 -0.149 -3.202  
 H -0.067 0.488 -3.618  
 C -4.262 -3.727 -2.308  
 H -4.752 -3.405 -3.234  
 H -4.999 -4.198 -1.656  
 H -3.474 -4.451 -2.546  
 C 0.183 2.533 -2.158  
 C 1.787 3.137 -3.549  
 H 2.735 2.981 -4.041  
 C 0.849 4.123 -3.603  
 H 0.889 5.017 -4.208  
 C -0.193 3.732 -2.703  
 H -1.109 4.264 -2.495  
 C 2.334 2.171 0.628  
 C 1.653 3.328 1.240  
 H 2.498 2.306 -0.443  
 H 3.271 1.897 1.108  
 C 1.817 3.863 2.473  
 H 0.906 3.811 0.607  
 C 3.588 -0.959 0.811  
 H 2.157 -1.280 2.360  
 H 3.068 0.251 2.508  
 C 4.817 -0.447 0.542  
 H 3.254 -1.823 0.234  
 C 5.758 -0.901 -0.483  
 H 5.171 0.379 1.159  
 C 7.061 -0.360 -0.507  
 C 5.442 -1.865 -1.466  
 C 6.384 -2.271 -2.408  
 C 8.003 -0.764 -1.452  
 C 7.673 -1.726 -2.410  
 H 8.998 -0.326 -1.440  
 H 8.403 -2.042 -3.149  
 H 7.332 0.388 0.235  
 H 4.445 -2.294 -1.499  
 H 6.109 -3.014 -3.152  
 C 1.007 5.058 2.914  
 C 2.787 3.343 3.503  
 H 0.425 4.836 3.821  
 H 0.309 5.388 2.139  
 H 1.654 5.909 3.171  
 H 3.416 2.536 3.123  
 H 2.255 2.964 4.387  
 H 3.445 4.145 3.863

1

2

3

Ardolino & Morken, Supporting Information

|                                              |         |              |                                 |
|----------------------------------------------|---------|--------------|---------------------------------|
|                                              | A       | A            | A                               |
| Frequencies --                               | 10.8508 | 12.2808      | 14.5263                         |
| Red. masses --                               | 5.8759  | 6.1046       | 5.6659                          |
| ZERO-POINT CORRECTION=                       |         |              | 0.751272 (HARTREE/<br>PARTICLE) |
| Thermal correction to Energy=                |         | 0.815377     |                                 |
| Thermal correction to Enthalpy=              |         | 0.816432     |                                 |
| Thermal correction to Gibbs Free Energy=     |         | 0.639731     |                                 |
| Sum of electronic and zero-point Energies=   |         | -2961.906560 |                                 |
| Sum of electronic and thermal Energies=      |         | -2961.842455 |                                 |
| Sum of electronic and thermal Enthalpies=    |         | -2961.841400 |                                 |
| Sum of electronic and thermal Free Energies= |         | -2962.018101 |                                 |

  

| ITEM          | VALUE    | THRESHOLD | CONVERGED? |
|---------------|----------|-----------|------------|
| MAXIMUM FORCE | 0.000015 | 0.000450  | YES        |
| RMS FORCE     | 0.000002 | 0.000300  | YES        |

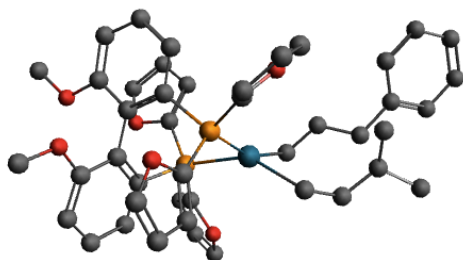

**TS<sub>3,3'</sub> 16**

-----  
 Cartesian coordinates (Angstroms):  
 -----

Pd 0.839 0.279 -0.641  
 P -1.042 1.807 -0.318  
 O -2.379 3.273 1.638  
 O -4.940 -1.606 0.046  
 O -0.361 3.262 -2.514  
 C -1.300 2.463 1.353  
 C -0.536 2.317 2.480  
 H 0.365 1.726 2.557  
 C -1.171 3.073 3.516  
 H -0.848 3.184 4.540  
 C -2.280 3.627 2.949  
 H -3.064 4.268 3.325  
 C -2.679 1.109 -0.838  
 C -3.255 0.023 -0.148  
 C -4.430 -0.568 -0.674  
 C -5.006 -0.098 -1.858  
 H -5.902 -0.554 -2.258  
 C -4.415 0.973 -2.528  
 H -4.863 1.342 -3.446  
 C -3.263 1.572 -2.031  
 H -2.821 2.401 -2.569  
 C -6.120 -2.248 -0.426  
 H -6.965 -1.551 -0.476  
 H -6.342 -3.032 0.298  
 H -5.963 -2.700 -1.412  
 C -0.920 3.365 -1.257  
 C -0.285 4.520 -3.030  
 H 0.130 4.597 -4.024  
 C -0.768 5.431 -2.140

H -0.824 6.501 -2.280  
 C -1.181 4.684 -0.991  
 H -1.626 5.071 -0.086  
 P -0.481 -1.687 -0.111  
 O -2.402 -3.437 -1.100  
 O -4.557 0.668 2.118  
 O 1.577 -2.952 1.157  
 C -1.524 -2.418 -1.403  
 C -1.588 -2.154 -2.746  
 H -1.024 -1.396 -3.268  
 C -2.553 -3.052 -3.302  
 H -2.863 -3.125 -4.334  
 C -3.012 -3.802 -2.260  
 H -3.736 -4.599 -2.182  
 C -1.626 -1.338 1.309  
 C -2.747 -0.495 1.166  
 C -3.486 -0.149 2.325  
 C -3.116 -0.624 3.586  
 H -3.683 -0.355 4.469  
 C -1.999 -1.450 3.705  
 H -1.710 -1.822 4.684  
 C -1.258 -1.804 2.583  
 H -0.389 -2.440 2.701  
 C -5.326 1.081 3.241  
 H -5.786 0.227 3.752  
 H -6.110 1.727 2.844  
 H -4.718 1.648 3.956  
 C 0.424 -3.177 0.434  
 C 2.135 -4.165 1.425  
 H 3.050 -4.147 1.996  
 C 1.381 -5.165 0.887  
 H 1.587 -6.224 0.938  
 C 0.272 -4.527 0.247  
 H -0.542 -5.004 -0.277  
 C 2.156 -0.994 -2.140  
 C 2.339 1.953 -0.361  
 C 3.384 1.269 0.273  
 C 4.652 0.991 -0.306  
 H 3.233 0.989 1.314  
 C 3.385 -0.411 -2.413  
 C 4.599 -0.683 -1.739  
 H 3.407 0.398 -3.145  
 C 4.665 -1.905 -0.849  
 C 5.877 -0.385 -2.501  
 H 2.532 2.403 -1.333  
 H 1.682 2.540 0.274  
 H 2.133 -1.949 -1.624  
 H 1.352 -0.835 -2.858  
 C 5.790 0.688 0.591  
 H 4.922 1.645 -1.132  
 C 5.654 -0.101 1.753  
 C 6.740 -0.344 2.594  
 C 8.000 0.187 2.300  
 C 7.068 1.212 0.313  
 C 8.156 0.967 1.152  
 H 9.127 1.393 0.910  
 H 8.844 -0.004 2.955  
 H 4.689 -0.536 1.995

H 6.602 -0.955 3.482  
H 7.201 1.838 -0.566  
H 6.734 -0.254 -1.834  
H 5.780 0.513 -3.121  
H 6.120 -1.221 -3.173  
H 5.607 -1.944 -0.296  
H 4.596 -2.825 -1.448  
H 3.845 -1.922 -0.125

|                                              |           |              |                                 |
|----------------------------------------------|-----------|--------------|---------------------------------|
|                                              | 1         | 2            | 3                               |
|                                              | A         | A            | A                               |
| Frequencies --                               | -374.2202 | 11.7269      | 13.5309                         |
| Red. masses --                               | 8.4878    | 6.0017       | 6.1207                          |
| ZERO-POINT CORRECTION=                       |           |              | 0.750389 (HARTREE/<br>PARTICLE) |
| Thermal correction to Energy=                |           | 0.813553     |                                 |
| Thermal correction to Enthalpy=              |           | 0.814608     |                                 |
| Thermal correction to Gibbs Free Energy=     |           | 0.642798     |                                 |
| Sum of electronic and zero-point Energies=   |           | -2961.877664 |                                 |
| Sum of electronic and thermal Energies=      |           | -2961.814500 |                                 |
| Sum of electronic and thermal Enthalpies=    |           | -2961.813445 |                                 |
| Sum of electronic and thermal Free Energies= |           | -2961.985255 |                                 |

| ITEM          | VALUE    | THRESHOLD | CONVERGED? |
|---------------|----------|-----------|------------|
| MAXIMUM FORCE | 0.000003 | 0.000450  | YES        |
| RMS FORCE     | 0.000000 | 0.000300  | YES        |

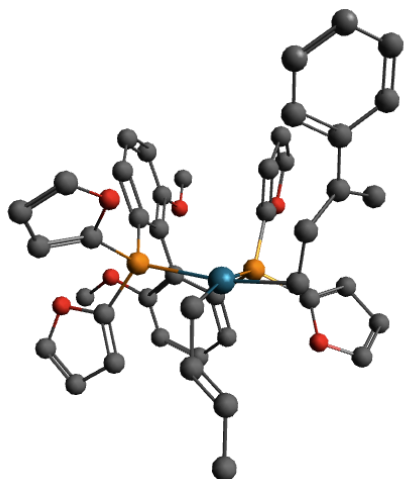

**GS 17**

-----  
Cartesian coordinates (Angstroms):  
-----

Pd 0.778 1.017 0.808  
C 2.612 0.644 1.869  
P -0.064 -1.258 1.110  
O -0.130 -3.756 -0.101  
O -4.817 -0.786 -0.961  
O 0.516 -1.286 3.779  
C 0.434 -2.500 -0.105  
C 1.387 -2.430 -1.086  
H 1.995 -1.565 -1.308  
C 1.413 -3.708 -1.726  
H 2.043 -4.017 -2.548

C 0.476 -4.467 -1.091  
H 0.136 -5.485 -1.215  
C -1.920 -1.299 1.182  
C -2.709 -1.090 0.035  
C -4.115 -0.994 0.186  
C -4.712 -1.104 1.445  
H -5.786 -1.032 1.558  
C -3.910 -1.304 2.568  
H -4.372 -1.389 3.547  
C -2.528 -1.398 2.445  
H -1.926 -1.544 3.333  
C -6.234 -0.673 -0.884  
H -6.691 -1.587 -0.486  
H -6.576 -0.515 -1.907  
H -6.534 0.182 -0.266  
C 0.424 -2.084 2.660  
C 0.914 -2.081 4.812  
H 1.028 -1.590 5.766  
C 1.087 -3.364 4.387  
H 1.404 -4.204 4.988  
C 0.768 -3.368 2.992  
H 0.779 -4.214 2.321  
P -1.024 1.536 -0.759  
O -3.647 2.417 -0.926  
O -3.021 -3.177 -1.659  
O 0.686 2.831 -2.439  
C -2.581 2.169 -0.088  
C -2.929 2.494 1.196  
H -2.297 2.389 2.066  
C -4.277 2.969 1.153  
H -4.878 3.312 1.982  
C -4.659 2.898 -0.154  
H -5.572 3.144 -0.675  
C -1.488 0.119 -1.866  
C -2.154 -1.012 -1.356  
C -2.369 -2.119 -2.214  
C -1.926 -2.097 -3.540  
H -2.091 -2.944 -4.194  
C -1.264 -0.969 -4.021  
H -0.920 -0.950 -5.051  
C -1.040 0.130 -3.198  
H -0.517 0.990 -3.594  
C -3.262 -4.327 -2.462  
H -3.893 -4.090 -3.326  
H -3.785 -5.036 -1.818  
H -2.324 -4.777 -2.809  
C -0.596 2.858 -1.936  
C 0.825 3.914 -3.254  
H 1.787 4.024 -3.730  
C -0.327 4.640 -3.282  
H -0.502 5.549 -3.838  
C -1.251 3.956 -2.429  
H -2.272 4.234 -2.216  
C 1.386 3.076 0.932  
C 0.828 3.643 2.176  
H 0.978 3.561 0.044  
H 2.477 3.125 0.904  
C 1.510 3.984 3.287

H -0.254 3.796 2.188  
 C 3.653 0.557 0.841  
 H 2.502 -0.248 2.484  
 H 2.713 1.524 2.506  
 C 4.365 -0.525 0.413  
 H 3.885 1.507 0.360  
 C 5.345 -0.392 -0.691  
 C 4.251 -1.883 1.070  
 C 6.441 -1.275 -0.803  
 C 5.224 0.603 -1.687  
 C 6.162 0.730 -2.709  
 C 7.379 -1.151 -1.829  
 C 7.251 -0.145 -2.788  
 H 8.215 -1.844 -1.875  
 H 7.978 -0.050 -3.590  
 H 6.573 -2.063 -0.068  
 H 4.369 1.271 -1.673  
 H 6.033 1.506 -3.459  
 C 0.892 4.536 4.541  
 H 2.595 3.867 3.294  
 H 1.087 3.892 5.410  
 H -0.194 4.639 4.440  
 H 1.300 5.525 4.795  
 H 4.177 -2.685 0.327  
 H 3.376 -1.950 1.717  
 H 5.130 -2.107 1.691

|                                              |        |              |                    |
|----------------------------------------------|--------|--------------|--------------------|
|                                              | 1      | 2            | 3                  |
|                                              | A      | A            | A                  |
| Frequencies --                               | 7.2125 | 12.2770      | 20.4200            |
| Red. masses --                               | 5.9620 | 6.0465       | 6.0096             |
| ZERO-POINT CORRECTION=                       |        |              | 0.751572 (HARTREE/ |
| PARTICLE)                                    |        |              |                    |
| Thermal correction to Energy=                |        | 0.815544     |                    |
| Thermal correction to Enthalpy=              |        | 0.816599     |                    |
| Thermal correction to Gibbs Free Energy=     |        | 0.640977     |                    |
| Sum of electronic and zero-point Energies=   |        | -2961.902613 |                    |
| Sum of electronic and thermal Energies=      |        | -2961.838641 |                    |
| Sum of electronic and thermal Enthalpies=    |        | -2961.837586 |                    |
| Sum of electronic and thermal Free Energies= |        | -2962.013208 |                    |

| ITEM          | VALUE    | THRESHOLD | CONVERGED? |
|---------------|----------|-----------|------------|
| MAXIMUM FORCE | 0.000005 | 0.000450  | YES        |
| RMS FORCE     | 0.000001 | 0.000300  | YES        |

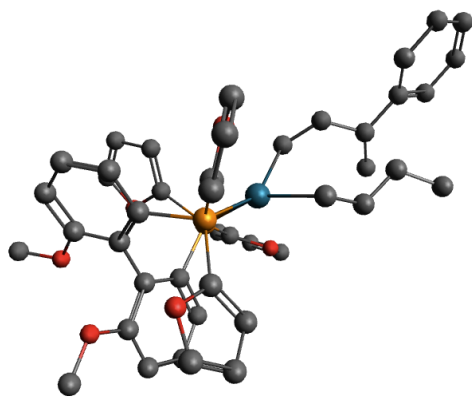

**TS<sub>3,3'</sub> 17**

-----  
 Cartesian coordinates (Angstroms):  
 -----

Pd -0.860 0.241 -0.080  
 P 0.619 -1.724 -0.056  
 O 2.163 -3.415 1.522  
 O 5.126 0.696 -0.994  
 O -0.986 -3.024 -1.831  
 C 1.219 -2.410 1.512  
 C 0.857 -2.121 2.801  
 H 0.145 -1.365 3.102  
 C 1.612 -2.987 3.652  
 H 1.585 -3.035 4.731  
 C 2.386 -3.745 2.824  
 H 3.111 -4.527 2.994  
 C 2.144 -1.394 -1.060  
 C 3.136 -0.499 -0.611  
 C 4.200 -0.173 -1.489  
 C 4.268 -0.717 -2.775  
 H 5.082 -0.464 -3.443  
 C 3.271 -1.595 -3.199  
 H 3.323 -2.021 -4.197  
 C 2.218 -1.932 -2.357  
 H 1.453 -2.614 -2.708  
 C 6.204 1.094 -1.833  
 H 6.825 0.239 -2.126  
 H 6.803 1.786 -1.240  
 H 5.843 1.606 -2.733  
 C -0.075 -3.231 -0.815  
 C -1.436 -4.246 -2.229  
 H -2.158 -4.243 -3.031  
 C -0.851 -5.233 -1.494  
 H -1.025 -6.295 -1.589  
 C 0.032 -4.577 -0.579  
 H 0.673 -5.040 0.156  
 P 0.993 1.800 0.125  
 O 2.878 3.223 -1.348  
 O 4.876 -1.477 1.207  
 O -0.396 3.331 1.894  
 C 1.783 2.387 -1.398  
 C 1.455 2.153 -2.707  
 H 0.648 1.520 -3.049  
 C 2.391 2.879 -3.508  
 H 2.436 2.925 -4.587  
 C 3.228 3.505 -2.633  
 H 4.078 4.158 -2.758  
 C 2.377 1.171 1.187  
 C 3.177 0.089 0.769  
 C 4.130 -0.438 1.676  
 C 4.271 0.091 2.962  
 H 4.999 -0.317 3.653  
 C 3.461 1.155 3.357  
 H 3.571 1.569 4.356  
 C 2.521 1.692 2.485  
 H 1.902 2.518 2.813  
 C 5.867 -2.043 2.058  
 H 6.623 -1.302 2.344  
 H 6.341 -2.835 1.478

H 5.421 -2.474 2.962  
 C 0.549 3.394 0.892  
 C -0.645 4.608 2.299  
 H -1.368 4.717 3.093  
 C 0.104 5.490 1.581  
 H 0.106 6.566 1.684  
 C 0.879 4.705 0.670  
 H 1.599 5.063 -0.051  
 C -2.146 1.877 -0.971  
 C -2.576 -1.081 0.837  
 C -3.810 -0.445 0.882  
 C -4.845 -0.563 -0.085  
 H -3.975 0.244 1.708  
 C -3.140 1.259 -1.750  
 C -4.499 1.157 -1.400  
 H -2.835 0.832 -2.707  
 H -4.825 1.832 -0.613  
 C -5.514 0.964 -2.508  
 H -2.455 -1.960 0.214  
 H -1.992 -1.085 1.756  
 H -2.470 2.489 -0.130  
 H -1.313 2.306 -1.524  
 C -6.224 -0.225 0.383  
 C -6.476 0.888 1.215  
 C -7.760 1.193 1.661  
 C -8.849 0.398 1.290  
 C -7.338 -1.008 0.018  
 C -8.626 -0.704 0.465  
 H -9.457 -1.338 0.166  
 H -9.850 0.636 1.637  
 H -5.655 1.533 1.515  
 H -7.911 2.060 2.299  
 H -7.199 -1.881 -0.611  
 H -6.468 0.574 -2.140  
 H -5.140 0.285 -3.280  
 H -5.730 1.924 -2.997  
 C -4.705 -1.698 -1.086  
 H -3.716 -1.674 -1.549  
 H -5.447 -1.636 -1.885  
 H -4.821 -2.678 -0.603

|                                              |           |              |                    |
|----------------------------------------------|-----------|--------------|--------------------|
|                                              | 1         | 2            | 3                  |
|                                              | A         | A            | A                  |
| Frequencies --                               | -378.6280 | 9.6581       | 13.1642            |
| Red. masses --                               | 8.7143    | 6.0104       | 5.8732             |
| ZERO-POINT CORRECTION=                       |           |              | 0.750711 (HARTREE/ |
| PARTICLE)                                    |           |              |                    |
| Thermal correction to Energy=                |           | 0.813845     |                    |
| Thermal correction to Enthalpy=              |           | 0.814900     |                    |
| Thermal correction to Gibbs Free Energy=     |           | 0.642827     |                    |
| Sum of electronic and zero-point Energies=   |           | -2961.873604 |                    |
| Sum of electronic and thermal Energies=      |           | -2961.810470 |                    |
| Sum of electronic and thermal Enthalpies=    |           | -2961.809415 |                    |
| Sum of electronic and thermal Free Energies= |           | -2961.981488 |                    |

  

| ITEM          | VALUE    | THRESHOLD | CONVERGED? |
|---------------|----------|-----------|------------|
| MAXIMUM FORCE | 0.000004 | 0.000450  | YES        |
| RMS FORCE     | 0.000001 | 0.000300  | YES        |

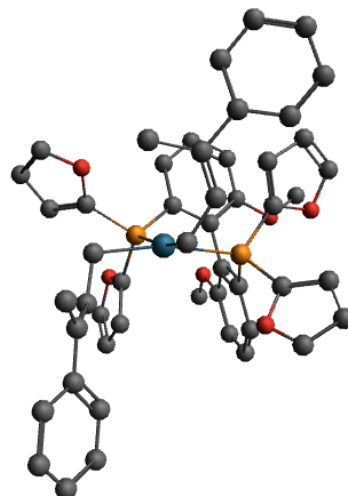

**GS 18**

-----  
 Cartesian coordinates (Angstroms):  
 -----

Pd 0.807 0.659 0.396  
 C 1.293 2.615 -0.349  
 P -0.785 0.197 -1.427  
 O -3.445 0.325 -2.185  
 O -2.017 -4.748 -0.389  
 O 0.980 0.993 -3.359  
 C -2.505 0.734 -1.264  
 C -3.092 1.576 -0.358  
 H -2.594 2.059 0.470  
 C -4.466 1.694 -0.734  
 H -5.231 2.280 -0.246  
 C -4.622 0.915 -1.843  
 H -5.464 0.689 -2.479  
 C -0.855 -1.614 -1.830  
 C -1.483 -2.532 -0.967  
 C -1.390 -3.915 -1.264  
 C -0.687 -4.364 -2.385  
 H -0.618 -5.421 -2.609  
 C -0.066 -3.437 -3.221  
 H 0.480 -3.785 -4.093  
 C -0.143 -2.075 -2.951  
 H 0.353 -1.375 -3.611  
 C -1.963 -6.151 -0.624  
 H -2.423 -6.417 -1.583  
 H -2.528 -6.611 0.187  
 H -0.931 -6.521 -0.602  
 C -0.356 0.971 -3.021  
 C 1.089 1.658 -4.544  
 H 2.088 1.750 -4.940  
 C -0.137 2.070 -4.972  
 H -0.350 2.622 -5.876  
 C -1.075 1.624 -3.987  
 H -2.146 1.760 -3.998  
 P 0.082 -1.356 1.590  
 O 0.523 -4.085 1.812

O -4.182 -2.690 -1.063  
 O 0.085 -0.037 3.976  
 C 0.919 -2.912 1.206  
 C 1.975 -3.166 0.372  
 H 2.477 -2.436 -0.245  
 C 2.249 -4.566 0.464  
 H 3.016 -5.121 -0.057  
 C 1.341 -5.070 1.347  
 H 1.154 -6.059 1.738  
 C -1.736 -1.696 1.443  
 C -2.297 -2.132 0.227  
 C -3.705 -2.256 0.136  
 C -4.526 -1.944 1.224  
 H -5.603 -2.038 1.151  
 C -3.949 -1.504 2.413  
 H -4.586 -1.260 3.259  
 C -2.569 -1.377 2.529  
 H -2.143 -1.028 3.461  
 C -5.588 -2.835 -1.227  
 H -6.003 -3.566 -0.523  
 H -5.734 -3.193 -2.246  
 H -6.106 -1.876 -1.102  
 C 0.353 -1.254 3.388  
 C 0.402 -0.148 5.297  
 H 0.237 0.735 5.895  
 C 0.872 -1.396 5.572  
 H 1.202 -1.763 6.533  
 C 0.839 -2.116 4.335  
 H 1.130 -3.142 4.169  
 C 2.504 0.914 1.701  
 C 3.696 0.561 0.918  
 H 2.328 0.199 2.506  
 H 2.503 1.924 2.110  
 C 4.746 1.333 0.517  
 H 3.742 -0.491 0.635  
 C 0.090 3.444 -0.239  
 H 1.572 2.417 -1.385  
 H 2.150 2.980 0.211  
 C -0.267 4.316 0.747  
 H -0.627 3.309 -1.048  
 C -1.545 5.062 0.679  
 C 0.588 4.522 1.977  
 C -2.180 5.522 1.852  
 C -2.178 5.361 -0.549  
 C -3.387 6.051 -0.596  
 C -3.391 6.215 1.805  
 C -4.006 6.482 0.581  
 H -3.854 6.545 2.731  
 H -4.945 7.027 0.542  
 H -1.730 5.320 2.819  
 H -1.699 5.074 -1.480  
 H -3.840 6.268 -1.560  
 C 5.817 0.757 -0.332  
 C 4.925 2.770 0.960  
 H 0.620 5.576 2.274  
 H 1.614 4.188 1.811  
 H 0.206 3.959 2.840  
 C 7.132 1.269 -0.303

C 5.569 -0.314 -1.219  
 C 8.147 0.718 -1.086  
 C 6.582 -0.867 -1.998  
 C 7.883 -0.358 -1.937  
 H 7.373 2.100 0.351  
 H 8.672 -0.784 -2.550  
 H 9.150 1.133 -1.029  
 H 4.559 -0.698 -1.317  
 H 6.351 -1.688 -2.672  
 H 4.054 3.140 1.502  
 H 5.104 3.439 0.110  
 H 5.787 2.878 1.632

|                                              | 1      | 2        | 3                  |
|----------------------------------------------|--------|----------|--------------------|
|                                              | A      | A        | A                  |
| Frequencies --                               | 7.1321 | 10.4356  | 13.1313            |
| Red. masses --                               | 6.0426 | 6.0869   | 6.0654             |
| ZERO-POINT CORRECTION=<br>PARTICLE)          |        |          | 0.833065 (HARTREE/ |
| Thermal correction to Energy=                |        | 0.902692 |                    |
| Thermal correction to Enthalpy=              |        | 0.903747 |                    |
| Thermal correction to Gibbs Free Energy=     |        | 0.713775 |                    |
| Sum of electronic and zero-point Energies=   |        |          | -3192.878300       |
| Sum of electronic and thermal Energies=      |        |          | -3192.808673       |
| Sum of electronic and thermal Enthalpies=    |        |          | -3192.807618       |
| Sum of electronic and thermal Free Energies= |        |          | -3192.997590       |

| ITEM          | VALUE    | THRESHOLD | CONVERGED? |
|---------------|----------|-----------|------------|
| MAXIMUM FORCE | 0.000011 | 0.000450  | YES        |
| RMS FORCE     | 0.000001 | 0.000300  | YES        |

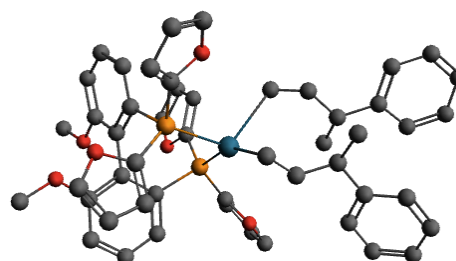TS<sub>3,3'</sub> 18

-----  
 Cartesian coordinates (Angstroms):  
 -----

Pd -0.291 0.480 -0.208  
 P 1.732 1.822 -0.233  
 O 3.793 2.787 -1.839  
 O 5.090 -1.785 1.399  
 O 0.518 3.738 1.270  
 C 2.599 2.096 -1.802  
 C 2.251 1.734 -3.077  
 H 1.373 1.169 -3.353  
 C 3.276 2.225 -3.946  
 H 3.331 2.122 -5.020  
 C 4.181 2.851 -3.142  
 H 5.109 3.369 -3.332  
 C 3.032 1.183 0.927  
 C 3.633 -0.072 0.706  
 C 4.527 -0.576 1.682

*Ardolino & Morken, Supporting Information*

C 4.796 0.141 2.853  
H 5.476 -0.249 3.599  
C 4.177 1.373 3.057  
H 4.386 1.933 3.965  
C 3.304 1.894 2.108  
H 2.838 2.857 2.284  
C 6.001 -2.348 2.335  
H 6.877 -1.704 2.483  
H 6.322 -3.297 1.904  
H 5.520 -2.534 3.302  
C 1.488 3.547 0.308  
C 0.431 5.078 1.500  
H -0.291 5.381 2.243  
C 1.308 5.756 0.709  
H 1.450 6.826 0.676  
C 1.996 4.765 -0.062  
H 2.775 4.929 -0.791  
P 0.798 -1.627 0.252  
O 2.166 -3.207 2.083  
O 5.568 -0.067 -1.167  
O -0.971 -3.052 -1.259  
C 1.370 -2.094 1.912  
C 1.123 -1.528 3.135  
H 0.542 -0.636 3.314  
C 1.795 -2.330 4.110  
H 1.819 -2.179 5.180  
C 2.409 -3.329 3.416  
H 3.024 -4.167 3.708  
C 2.324 -1.686 -0.815  
C 3.449 -0.878 -0.548  
C 4.510 -0.864 -1.487  
C 4.449 -1.623 -2.659  
H 5.261 -1.607 -3.376  
C 3.324 -2.408 -2.906  
H 3.274 -3.001 -3.815  
C 2.271 -2.442 -1.999  
H 1.406 -3.058 -2.214  
C 6.667 0.003 -2.068  
H 7.139 -0.978 -2.205  
H 7.384 0.686 -1.611  
H 6.362 0.399 -3.044  
C -0.079 -3.162 -0.211  
C -1.541 -4.277 -1.439  
H -2.259 -4.349 -2.241  
C -1.053 -5.168 -0.532  
H -1.330 -6.208 -0.438  
C -0.104 -4.448 0.261  
H 0.496 -4.835 1.070  
C -1.712 0.670 1.992  
C -1.549 1.835 -1.394  
C -2.524 0.836 -1.524  
C -3.897 0.892 -1.069  
H -2.280 0.030 -2.210  
C -2.989 1.035 1.683  
C -4.018 0.160 1.189  
C -5.429 0.457 1.541  
H -1.773 2.763 -0.877  
H -0.823 1.940 -2.197

H -1.440 -0.370 2.115  
H -1.011 1.410 2.365  
C -4.817 -0.085 -1.709  
C -4.387 -1.381 -2.082  
C -5.242 -2.281 -2.713  
C -6.564 -1.926 -3.002  
C -6.157 0.245 -2.003  
C -7.012 -0.655 -2.642  
H -8.034 -0.356 -2.859  
H -7.228 -2.628 -3.498  
H -3.372 -1.693 -1.863  
H -4.875 -3.269 -2.981  
H -6.540 1.226 -1.749  
C -5.796 1.610 2.277  
C -6.481 -0.421 1.190  
C -7.806 -0.158 1.539  
C -8.140 0.993 2.253  
C -7.120 1.876 2.619  
H -9.171 1.195 2.528  
H -7.353 2.771 3.189  
H -6.268 -1.324 0.632  
H -8.580 -0.863 1.248  
H -5.033 2.303 2.612  
H -3.223 2.095 1.749  
C -3.628 -1.293 1.057  
H -4.364 -1.885 0.514  
H -3.503 -1.753 2.048  
H -2.673 -1.382 0.530  
C -4.454 2.286 -0.838  
H -3.754 2.908 -0.278  
H -5.394 2.277 -0.286  
H -4.633 2.787 -1.799

|                                              |           |          |                    |
|----------------------------------------------|-----------|----------|--------------------|
|                                              | 1         | 2        | 3                  |
|                                              | A         | A        | A                  |
| Frequencies --                               | -252.3017 | 11.0594  | 14.8511            |
| Red. masses --                               | 7.6328    | 5.7524   | 5.9998             |
| ZERO-POINT CORRECTION=                       |           |          | 0.832197 (HARTREE/ |
| PARTICLE)                                    |           |          |                    |
| Thermal correction to Energy=                |           | 0.900974 |                    |
| Thermal correction to Enthalpy=              |           | 0.902029 |                    |
| Thermal correction to Gibbs Free Energy=     |           | 0.718231 |                    |
| Sum of electronic and zero-point Energies=   |           |          | -3192.838701       |
| Sum of electronic and thermal Energies=      |           |          | -3192.769925       |
| Sum of electronic and thermal Enthalpies=    |           |          | -3192.768870       |
| Sum of electronic and thermal Free Energies= |           |          | -3192.952668       |

  

|               |          |           |            |
|---------------|----------|-----------|------------|
| ITEM          | VALUE    | THRESHOLD | CONVERGED? |
| MAXIMUM FORCE | 0.000001 | 0.000450  | YES        |
| RMS FORCE     | 0.000000 | 0.000300  | YES        |

---

**Structures and Energies from Figure 6**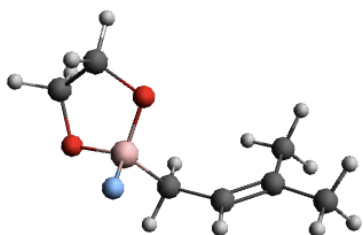**V**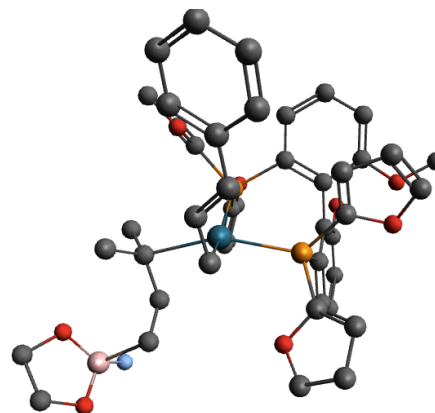**TS<sub>TM</sub> V**

-----  
 Cartesian coordinates (Angstroms):  
 -----

C -1.550 0.662 -0.357  
 C -2.614 -0.102 -0.046  
 H -1.576 1.692 0.010  
 C -3.766 0.451 0.762  
 B 1.071 0.492 -0.173  
 C -0.287 0.313 -1.079  
 H -0.178 0.992 -1.942  
 H -0.326 -0.703 -1.491  
 O 1.122 -0.465 0.955  
 F 1.125 1.849 0.313  
 O 2.305 0.222 -0.962  
 C -2.770 -1.550 -0.442  
 C 3.054 -0.771 -0.302  
 C 2.476 -0.818 1.122  
 H 3.009 -0.098 1.772  
 H 2.568 -1.810 1.589  
 H 4.131 -0.536 -0.310  
 H 2.936 -1.756 -0.794  
 H -3.612 1.503 1.023  
 H -3.909 -0.108 1.698  
 H -4.718 0.374 0.215  
 H -1.951 -1.904 -1.072  
 H -3.711 -1.712 -0.986  
 H -2.814 -2.201 0.443

|                                              | 1       | 2           | 3                               |
|----------------------------------------------|---------|-------------|---------------------------------|
|                                              | A       | A           | A                               |
| Frequencies --                               | 32.9174 | 47.6080     | 77.0765                         |
| Red. masses --                               | 3.1012  | 3.7338      | 3.2159                          |
| ZERO-POINT CORRECTION=                       |         |             | 0.197792 (HARTREE/<br>PARTICLE) |
| Thermal correction to Energy=                |         | 0.212417    |                                 |
| Thermal correction to Enthalpy=              |         | 0.213472    |                                 |
| Thermal correction to Gibbs Free Energy=     |         | 0.152545    |                                 |
| Sum of electronic and zero-point Energies=   |         | -549.760118 |                                 |
| Sum of electronic and thermal Energies=      |         | -549.745492 |                                 |
| Sum of electronic and thermal Enthalpies=    |         | -549.744437 |                                 |
| Sum of electronic and thermal Free Energies= |         | -549.805364 |                                 |

| ITEM          | VALUE    | THRESHOLD | CONVERGED? |
|---------------|----------|-----------|------------|
| MAXIMUM FORCE | 0.000014 | 0.000450  | YES        |
| RMS FORCE     | 0.000002 | 0.000300  | YES        |

-----  
 Cartesian coordinates (Angstroms):  
 -----

Pd -0.975 0.291 0.092  
 P 0.515 -0.746 -1.661  
 O 1.467 -3.026 -2.908  
 O 5.111 -0.817 0.767  
 O -0.383 1.158 -3.375  
 C 0.601 -2.533 -1.956  
 C -0.064 -3.575 -1.367  
 H -0.791 -3.494 -0.572  
 C 0.408 -4.773 -1.988  
 H 0.100 -5.786 -1.775  
 C 1.331 -4.380 -2.910  
 H 1.947 -4.914 -3.618  
 C 2.294 -0.237 -1.464  
 C 3.078 -0.745 -0.411  
 C 4.409 -0.282 -0.269  
 C 4.935 0.669 -1.148  
 H 5.953 1.022 -1.039  
 C 4.135 1.171 -2.172  
 H 4.541 1.913 -2.854  
 C 2.826 0.728 -2.334  
 H 2.227 1.128 -3.142  
 C 6.466 -0.422 0.951  
 H 7.080 -0.672 0.077  
 H 6.825 -0.981 1.816  
 H 6.547 0.652 1.155  
 C 0.113 -0.126 -3.324  
 C -0.666 1.430 -4.680  
 H -1.061 2.415 -4.880  
 C -0.369 0.357 -5.465  
 H -0.495 0.289 -6.536  
 C 0.139 -0.652 -4.587  
 H 0.485 -1.638 -4.856  
 P 0.852 0.158 1.709  
 O 3.232 1.179 2.677  
 O 3.974 -3.302 -0.583  
 O -0.976 -0.400 3.656  
 C 2.187 1.377 1.800  
 C 2.368 2.562 1.138



H 1.711 2.974 0.386  
 C 3.585 3.128 1.630  
 H 4.041 4.061 1.330  
 C 4.064 2.249 2.555  
 H 4.938 2.240 3.188  
 C 1.676 -1.498 1.587  
 C 2.588 -1.781 0.552  
 C 3.101 -3.096 0.440  
 C 2.708 -4.098 1.333  
 H 3.100 -5.103 1.245  
 C 1.795 -3.797 2.343  
 H 1.488 -4.575 3.035  
 C 1.277 -2.513 2.473  
 H 0.565 -2.304 3.262  
 C 4.538 -4.600 -0.748  
 H 5.110 -4.906 0.136  
 H 5.209 -4.526 -1.604  
 H 3.764 -5.347 -0.959  
 C 0.238 0.207 3.423  
 C -1.283 -0.201 4.968  
 H -2.215 -0.631 5.302  
 C -0.307 0.524 5.582  
 H -0.290 0.834 6.617  
 C 0.682 0.789 4.582  
 H 1.607 1.331 4.706  
 C -1.937 1.754 1.316  
 C -1.836 2.959 0.499  
 C -0.968 3.981 0.725  
 H -2.505 3.022 -0.357  
 C -0.791 5.187 -0.082  
 C 0.052 6.213 0.397  
 C -1.418 5.390 -1.332  
 C -1.217 6.564 -2.053  
 C 0.253 7.387 -0.327  
 C -0.382 7.571 -1.557  
 H 0.906 8.159 0.070  
 H -0.227 8.484 -2.125  
 H 0.548 6.080 1.355  
 H -2.061 4.619 -1.744  
 H -1.712 6.693 -3.012  
 H -0.337 3.923 1.612  
 H -2.940 1.362 1.462  
 H -1.411 1.833 2.267  
 C -3.220 -1.150 0.314  
 C -3.042 -0.261 -0.808  
 H -2.636 -2.070 0.268  
 C -4.044 0.874 -0.971  
 B -5.615 -2.419 0.644  
 C -4.129 -1.071 1.356  
 H -4.708 -0.163 1.511  
 H -3.952 -1.665 2.249  
 O -6.569 -2.305 1.673  
 F -4.871 -3.564 0.605  
 O -6.110 -1.895 -0.569  
 C -2.864 -0.983 -2.143  
 C -7.429 -1.405 -0.318  
 C -7.546 -1.368 1.221  
 H -8.165 -2.089 -0.762

H -7.561 -0.417 -0.772  
 H -8.537 -1.662 1.581  
 H -7.320 -0.367 1.615  
 H -3.840 -1.377 -2.466  
 H -2.181 -1.833 -2.077  
 H -2.510 -0.312 -2.929  
 H -5.018 0.457 -1.263  
 H -3.729 1.559 -1.766  
 H -4.209 1.460 -0.065

|                                              | 1         | 2        | 3                           |
|----------------------------------------------|-----------|----------|-----------------------------|
|                                              | A         | A        | A                           |
| Frequencies --                               | -263.9970 | 12.6109  | 15.7265                     |
| Red. masses --                               | 8.9817    | 6.3858   | 6.1630                      |
| ZERO-POINT CORRECTION=                       |           |          | 0.825225 (HARTREE/PARTICLE) |
| Thermal correction to Energy=                |           | 0.896201 |                             |
| Thermal correction to Enthalpy=              |           | 0.897256 |                             |
| Thermal correction to Gibbs Free Energy=     |           | 0.706902 |                             |
| Sum of electronic and zero-point Energies=   |           |          | -3315.710373                |
| Sum of electronic and thermal Energies=      |           |          | -3315.639397                |
| Sum of electronic and thermal Enthalpies=    |           |          | -3315.638342                |
| Sum of electronic and thermal Free Energies= |           |          | -3315.828696                |

| ITEM          | VALUE    | THRESHOLD | CONVERGED? |
|---------------|----------|-----------|------------|
| MAXIMUM FORCE | 0.000002 | 0.000450  | YES        |
| RMS FORCE     | 0.000000 | 0.000300  | YES        |

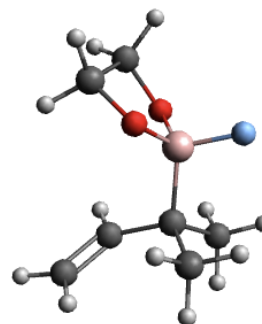

W

-----  
 Cartesian coordinates (Angstroms):  
 -----

C 1.324 1.108 0.633  
 C 1.965 2.149 0.083  
 H 0.840 1.269 1.598  
 H 2.001 3.117 0.578  
 B -0.486 -0.563 -0.147  
 C 1.139 -0.280 0.090  
 C 1.662 -1.285 1.145  
 C 1.893 -0.492 -1.231  
 O -1.262 -0.308 1.091  
 F -0.635 -1.930 -0.571  
 O -1.095 0.316 -1.176  
 H 2.468 2.083 -0.878  
 C -2.070 1.119 -0.555  
 C -2.455 0.340 0.711  
 H -3.258 -0.387 0.479  
 H -2.824 0.989 1.519

Ardolino & Morken, Supporting Information

H -2.928 1.292 -1.224  
H -1.660 2.109 -0.281  
H 1.730 -1.511 -1.597  
H 2.978 -0.340 -1.127  
H 1.532 0.195 -2.005  
H 1.467 -2.312 0.818  
H 1.158 -1.147 2.108  
H 2.745 -1.183 1.317

|                                              |         |             |                                 |
|----------------------------------------------|---------|-------------|---------------------------------|
|                                              | 1       | 2           | 3                               |
|                                              | A       | A           | A                               |
| Frequencies --                               | 76.3682 | 104.8474    | 111.5862                        |
| Red. masses --                               | 3.9750  | 3.2842      | 3.2093                          |
| ZERO-POINT CORRECTION=                       |         |             | 0.198015 (HARTREE/<br>PARTICLE) |
| Thermal correction to Energy=                |         | 0.212261    |                                 |
| Thermal correction to Enthalpy=              |         | 0.213316    |                                 |
| Thermal correction to Gibbs Free Energy=     |         | 0.155570    |                                 |
| Sum of electronic and zero-point Energies=   |         | -549.750417 |                                 |
| Sum of electronic and thermal Energies=      |         | -549.736172 |                                 |
| Sum of electronic and thermal Enthalpies=    |         | -549.735117 |                                 |
| Sum of electronic and thermal Free Energies= |         | -549.792862 |                                 |

| ITEM          | VALUE    | THRESHOLD | CONVERGED? |
|---------------|----------|-----------|------------|
| MAXIMUM FORCE | 0.000040 | 0.000450  | YES        |
| RMS FORCE     | 0.000008 | 0.000300  | YES        |

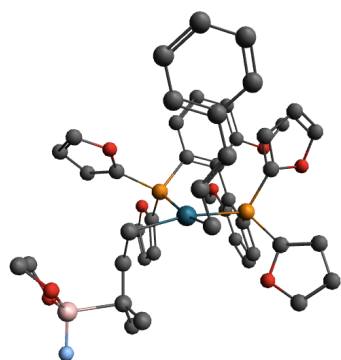

**TS<sub>TM</sub> W**

-----  
Cartesian coordinates (Angstroms):  
-----

Pd -0.763 0.474 0.544  
P -0.055 -1.102 -1.258  
O 0.477 -3.718 -1.950  
O 5.095 -0.719 -0.783  
O -1.551 0.246 -3.100  
C -0.022 -2.886 -0.972  
C -0.437 -3.636 0.096  
H -0.860 -3.255 1.013  
C -0.186 -5.003 -0.238  
H -0.390 -5.874 0.368  
C 0.367 -4.991 -1.484  
H 0.717 -5.767 -2.149  
C 1.629 -0.657 -1.889  
C 2.776 -0.907 -1.111  
C 4.029 -0.446 -1.582  
C 4.129 0.245 -2.794  
H 5.088 0.595 -3.155

C 2.979 0.487 -3.543  
H 3.057 1.024 -4.484  
C 1.736 0.046 -3.100  
H 0.855 0.249 -3.697  
C 6.391 -0.311 -1.209  
H 6.666 -0.778 -2.162  
H 7.079 -0.646 -0.432  
H 6.457 0.779 -1.306  
C -1.119 -1.010 -2.731  
C -2.369 0.090 -4.180  
H -2.782 0.999 -4.590  
C -2.481 -1.227 -4.507  
H -3.066 -1.642 -5.315  
C -1.670 -1.943 -3.569  
H -1.508 -3.009 -3.528  
P 1.438 0.464 1.490  
O 3.934 1.618 1.300  
O 3.723 -3.438 -1.077  
O 0.425 0.332 4.016  
C 2.632 1.659 0.852  
C 2.489 2.688 -0.041  
H 1.579 2.958 -0.554  
C 3.768 3.316 -0.152  
H 4.030 4.163 -0.769  
C 4.601 2.628 0.679  
H 5.646 2.726 0.933  
C 2.262 -1.193 1.385  
C 2.749 -1.695 0.163  
C 3.275 -3.011 0.134  
C 3.309 -3.796 1.290  
H 3.712 -4.801 1.266  
C 2.812 -3.280 2.486  
H 2.836 -3.891 3.383  
C 2.288 -1.993 2.540  
H 1.903 -1.615 3.479  
C 4.259 -4.753 -1.182  
H 5.141 -4.881 -0.543  
H 4.550 -4.873 -2.226  
H 3.510 -5.511 -0.925  
C 1.459 0.848 3.267  
C 0.601 0.761 5.297  
H -0.139 0.430 6.008  
C 1.713 1.542 5.390  
H 2.091 2.021 6.282  
C 2.273 1.599 4.074  
H 3.167 2.119 3.765  
C -1.311 2.153 1.744  
C -1.537 3.223 0.770  
C -0.703 4.272 0.558  
H -2.451 3.155 0.182  
C -0.875 5.361 -0.405  
C 0.040 6.435 -0.389  
C -1.912 5.400 -1.362  
C -2.028 6.467 -2.249  
C -0.077 7.502 -1.279  
C -1.114 7.525 -2.215  
H 0.642 8.315 -1.241  
H -1.208 8.354 -2.910

H 0.848 6.426 0.338  
 H -2.630 4.588 -1.415  
 H -2.836 6.472 -2.976  
 H 0.193 4.340 1.175  
 H -2.210 1.827 2.267  
 H -0.515 2.381 2.452  
 C -3.176 -0.939 0.562  
 C -2.938 0.350 0.035  
 H -2.841 -1.772 -0.057  
 H -3.450 1.179 0.513  
 B -5.586 -1.683 0.912  
 C -3.884 -1.316 1.727  
 C -4.173 -0.252 2.781  
 C -3.476 -2.660 2.338  
 O -6.097 -0.478 0.321  
 F -6.278 -2.118 2.044  
 O -5.476 -2.693 -0.103  
 H -2.865 0.438 -1.046  
 C -5.656 -2.056 -1.358  
 C -6.436 -0.769 -1.028  
 H -6.199 -2.718 -2.044  
 H -4.684 -1.820 -1.820  
 H -7.522 -0.932 -1.124  
 H -6.163 0.069 -1.683  
 H -4.593 0.658 2.343  
 H -3.259 0.022 3.328  
 H -4.897 -0.631 3.507  
 H -3.330 -3.422 1.567  
 H -4.247 -3.022 3.022  
 H -2.540 -2.566 2.909

|                                              | 1         | 2        | 3                               |
|----------------------------------------------|-----------|----------|---------------------------------|
|                                              | A         | A        | A                               |
| Frequencies --                               | -151.0941 | 9.4811   | 11.1710                         |
| Red. masses --                               | 5.3081    | 6.2993   | 6.4266                          |
| ZERO-POINT CORRECTION=                       |           |          | 0.825403 (HARTREE/<br>PARTICLE) |
| Thermal correction to Energy=                |           | 0.896177 |                                 |
| Thermal correction to Enthalpy=              |           | 0.897232 |                                 |
| Thermal correction to Gibbs Free Energy=     |           | 0.706032 |                                 |
| Sum of electronic and zero-point Energies=   |           |          | -3315.722527                    |
| Sum of electronic and thermal Energies=      |           |          | -3315.651752                    |
| Sum of electronic and thermal Enthalpies=    |           |          | -3315.650697                    |
| Sum of electronic and thermal Free Energies= |           |          | -3315.841898                    |

| ITEM          | VALUE    | THRESHOLD | CONVERGED? |
|---------------|----------|-----------|------------|
| MAXIMUM FORCE | 0.000003 | 0.000450  | YES        |
| RMS FORCE     | 0.000001 | 0.000300  | YES        |

**Structures and Energies from Figure SI-1**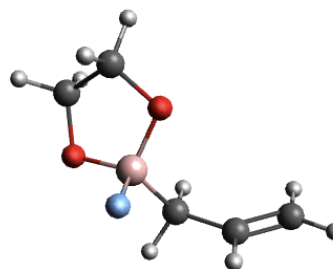**SI-14**

-----  
 Cartesian coordinates (Angstroms):  
 -----

C 2.400 0.155 0.002  
 C 3.247 -0.879 0.075  
 H 2.580 0.903 -0.774  
 H 4.086 -0.986 -0.608  
 B -0.217 0.432 -0.044  
 C 1.179 0.392 0.826  
 H 1.264 1.376 1.316  
 H 1.109 -0.357 1.627  
 O -0.529 -0.876 -0.659  
 F -0.093 1.455 -1.054  
 O -1.390 0.747 0.813  
 H 3.123 -1.666 0.818  
 C -2.332 -0.292 0.688  
 C -1.928 -1.033 -0.598  
 H -2.431 -0.577 -1.472  
 H -2.203 -2.098 -0.583  
 H -3.360 0.101 0.641  
 H -2.288 -0.981 1.554

|                                              | 1       | 2        | 3                               |
|----------------------------------------------|---------|----------|---------------------------------|
|                                              | A       | A        | A                               |
| Frequencies --                               | 56.8402 | 91.8408  | 103.6136                        |
| Red. masses --                               | 3.5729  | 3.3961   | 2.5785                          |
| ZERO-POINT CORRECTION=                       |         |          | 0.141412 (HARTREE/<br>PARTICLE) |
| Thermal correction to Energy=                |         | 0.152569 |                                 |
| Thermal correction to Enthalpy=              |         | 0.153624 |                                 |
| Thermal correction to Gibbs Free Energy=     |         | 0.101269 |                                 |
| Sum of electronic and zero-point Energies=   |         |          | -471.177542                     |
| Sum of electronic and thermal Energies=      |         |          | -471.166385                     |
| Sum of electronic and thermal Enthalpies=    |         |          | -471.165330                     |
| Sum of electronic and thermal Free Energies= |         |          | -471.217685                     |

| ITEM          | VALUE    | THRESHOLD | CONVERGED? |
|---------------|----------|-----------|------------|
| MAXIMUM FORCE | 0.000050 | 0.000450  | YES        |
| RMS FORCE     | 0.000007 | 0.000300  | YES        |

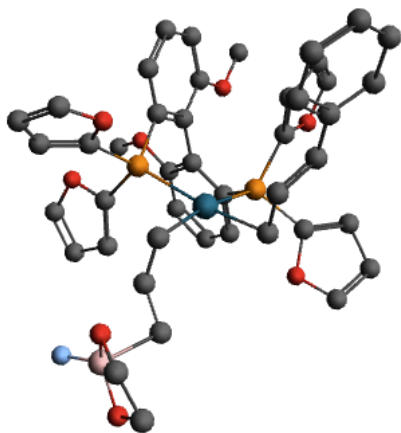

**TS<sub>TM</sub> 1**

-----  
 Cartesian coordinates (Angstroms):  
 -----

Pd -0.966 0.092 0.300  
 P 0.332 -1.279 -1.287  
 O 1.521 -3.750 -1.627  
 O 5.141 0.396 -0.268  
 O -1.195 -0.485 -3.404  
 C 0.729 -2.976 -0.808  
 C 0.354 -3.708 0.288  
 H -0.256 -3.356 1.106  
 C 0.943 -5.002 0.140  
 H 0.860 -5.840 0.816  
 C 1.636 -4.969 -1.033  
 H 2.232 -5.696 -1.565  
 C 1.936 -0.476 -1.755  
 C 2.999 -0.390 -0.837  
 C 4.152 0.350 -1.201  
 C 4.234 0.983 -2.445  
 H 5.115 1.547 -2.723  
 C 3.166 0.888 -3.335  
 H 3.230 1.379 -4.302  
 C 2.023 0.170 -3.000  
 H 1.203 0.115 -3.705  
 C 6.332 1.115 -0.571  
 H 6.843 0.698 -1.447  
 H 6.974 1.010 0.304  
 H 6.125 2.178 -0.743  
 C -0.500 -1.555 -2.882  
 C -1.779 -0.908 -4.560  
 H -2.361 -0.169 -5.090  
 C -1.487 -2.218 -4.790  
 H -1.821 -2.814 -5.627  
 C -0.657 -2.639 -3.704  
 H -0.223 -3.616 -3.555  
 P 1.043 0.729 1.483  
 O 3.159 2.504 1.414  
 O 4.519 -2.597 -0.495  
 O -0.151 0.480 3.923  
 C 1.947 2.162 0.855

C 1.620 3.069 -0.117  
 H 0.723 3.053 -0.719  
 C 2.684 4.022 -0.165  
 H 2.766 4.880 -0.816  
 C 3.585 3.631 0.781  
 H 4.532 4.027 1.114  
 C 2.271 -0.656 1.607  
 C 3.006 -1.091 0.487  
 C 3.839 -2.229 0.624  
 C 3.930 -2.911 1.841  
 H 4.568 -3.780 1.943  
 C 3.185 -2.467 2.932  
 H 3.254 -2.997 3.878  
 C 2.359 -1.354 2.823  
 H 1.786 -1.033 3.683  
 C 5.387 -3.725 -0.427  
 H 6.187 -3.573 0.307  
 H 5.824 -3.824 -1.421  
 H 4.836 -4.640 -0.181  
 C 0.772 1.217 3.215  
 C -0.239 1.030 5.166  
 H -0.929 0.551 5.844  
 C 0.593 2.103 5.273  
 H 0.725 2.732 6.142  
 C 1.252 2.225 4.008  
 H 1.992 2.958 3.725  
 C -2.146 1.499 1.396  
 C -2.458 2.554 0.431  
 C -1.873 3.778 0.394  
 H -3.214 2.314 -0.316  
 C -2.124 4.855 -0.565  
 C -1.471 6.092 -0.387  
 C -2.992 4.731 -1.673  
 C -3.196 5.794 -2.548  
 C -1.675 7.156 -1.265  
 C -2.541 7.015 -2.351  
 H -1.157 8.097 -1.099  
 H -2.702 7.842 -3.037  
 H -0.796 6.213 0.457  
 H -3.508 3.793 -1.853  
 H -3.869 5.670 -3.392  
 H -1.133 4.009 1.160  
 H -3.009 0.917 1.720  
 H -1.582 1.859 2.256  
 C -3.016 -1.804 0.432  
 C -2.896 -0.662 -0.424  
 H -2.423 -2.676 0.155  
 H -3.657 0.102 -0.282  
 B -5.425 -2.950 0.645  
 C -3.865 -1.959 1.516  
 H -4.382 -1.085 1.909  
 H -3.646 -2.738 2.242  
 O -6.304 -3.120 1.742  
 F -4.803 -4.085 0.189  
 O -5.987 -2.067 -0.309  
 H -2.703 -0.875 -1.473  
 C -7.276 -1.683 0.169  
 C -7.267 -2.073 1.661

Ardolino & Morken, Supporting Information

H -8.055 -2.231 -0.381  
H -7.440 -0.611 0.013  
H -8.239 -2.431 2.016  
H -6.963 -1.225 2.292

|                                              | 1         | 2            | 3                  |
|----------------------------------------------|-----------|--------------|--------------------|
|                                              | A         | A            | A                  |
| Frequencies --                               | -246.1626 | 6.6284       | 10.8363            |
| Red. masses --                               | 8.7941    | 6.5061       | 6.3592             |
| ZERO-POINT CORRECTION=<br>PARTICLE)          |           |              | 0.769045 (HARTREE/ |
| Thermal correction to Energy=                |           | 0.836570     |                    |
| Thermal correction to Enthalpy=              |           | 0.837625     |                    |
| Thermal correction to Gibbs Free Energy=     |           | 0.650627     |                    |
| Sum of electronic and zero-point Energies=   |           | -3237.152036 |                    |
| Sum of electronic and thermal Energies=      |           | -3237.084511 |                    |
| Sum of electronic and thermal Enthalpies=    |           | -3237.083456 |                    |
| Sum of electronic and thermal Free Energies= |           | -3237.270453 |                    |

| ITEM          | VALUE    | THRESHOLD | CONVERGED? |
|---------------|----------|-----------|------------|
| MAXIMUM FORCE | 0.000002 | 0.000450  | YES        |
| RMS FORCE     | 0.000000 | 0.000300  | YES        |

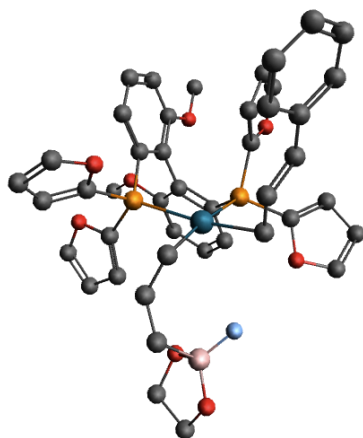

TS TM 2

-----  
Cartesian coordinates (Angstroms):  
-----

Pd -0.529 1.166 0.123  
P 0.956 -0.118 1.648  
O 3.565 -0.769 2.250  
O 1.041 -4.733 -0.734  
O -0.589 0.445 3.838  
C 2.749 0.071 1.521  
C 3.516 0.965 0.821  
H 3.159 1.751 0.166  
C 4.879 0.660 1.133  
H 5.762 1.159 0.760  
C 4.847 -0.395 1.996  
H 5.612 -0.967 2.499  
C 0.639 -1.944 1.570  
C 1.016 -2.697 0.441  
C 0.647 -4.063 0.383  
C -0.078 -4.656 1.421  
H -0.357 -5.702 1.376

C -0.446 -3.890 2.525  
H -1.009 -4.350 3.332  
C -0.098 -2.545 2.604  
H -0.402 -1.969 3.469  
C 0.706 -6.111 -0.858  
H 1.153 -6.708 -0.055  
H 1.115 -6.432 -1.816  
H -0.380 -6.260 -0.860  
C 0.712 0.281 3.410  
C -0.541 0.790 5.157  
H -1.496 0.947 5.635  
C 0.749 0.860 5.584  
H 1.085 1.114 6.579  
C 1.563 0.529 4.454  
H 2.641 0.470 4.422  
P -0.364 -0.546 -1.553  
O -1.397 -3.041 -2.152  
O 3.616 -3.408 0.204  
O -0.240 1.156 -3.692  
C -1.512 -1.927 -1.350  
C -2.596 -2.066 -0.525  
H -2.933 -1.341 0.201  
C -3.183 -3.334 -0.829  
H -4.055 -3.779 -0.372  
C -2.416 -3.879 -1.816  
H -2.461 -4.807 -2.365  
C 1.339 -1.269 -1.663  
C 1.841 -2.144 -0.681  
C 3.193 -2.562 -0.773  
C 4.014 -2.112 -1.811  
H 5.046 -2.433 -1.880  
C 3.498 -1.235 -2.763  
H 4.137 -0.880 -3.566  
C 2.176 -0.810 -2.695  
H 1.802 -0.119 -3.439  
C 4.959 -3.878 0.167  
H 5.163 -4.443 -0.751  
H 5.067 -4.539 1.027  
H 5.675 -3.052 0.252  
C -0.737 -0.055 -3.267  
C -0.674 1.346 -4.969  
H -0.355 2.263 -5.440  
C -1.441 0.295 -5.373  
H -1.920 0.180 -6.334  
C -1.483 -0.615 -4.270  
H -1.991 -1.567 -4.229  
C -2.077 2.163 -0.967  
C -3.305 1.956 -0.201  
C -4.317 1.121 -0.549  
H -3.396 2.521 0.726  
C -5.549 0.865 0.199  
C -6.547 0.055 -0.382  
C -5.805 1.385 1.488  
C -6.999 1.114 2.149  
C -7.743 -0.218 0.281  
C -7.979 0.312 1.552  
H -8.492 -0.844 -0.196  
H -8.909 0.102 2.073

## Ardolino & Morken, Supporting Information

H -6.375 -0.361 -1.372  
H -5.059 2.003 1.979  
H -7.168 1.528 3.139  
H -4.228 0.578 -1.490  
H -1.710 3.188 -0.985  
H -2.127 1.757 -1.977  
C 0.631 3.527 1.496  
C -0.652 2.897 1.488  
H 1.435 2.969 1.980  
H -0.880 2.328 2.389  
B 1.673 4.491 -0.966  
C 0.982 4.747 0.933  
H 1.896 5.211 1.294  
H 0.183 5.440 0.672  
O 1.972 5.828 -1.327  
F 0.593 3.906 -1.572  
O 2.862 3.722 -0.896  
H -1.470 3.547 1.183  
C 3.944 4.648 -0.816  
C 3.389 5.936 -1.459  
H 4.816 4.249 -1.343  
H 4.224 4.815 0.234  
H 3.655 5.999 -2.523  
H 3.754 6.843 -0.963

|                                                        | 1         | 2       | 3            |
|--------------------------------------------------------|-----------|---------|--------------|
|                                                        | A         | A       | A            |
| Frequencies --                                         | -345.7525 | 10.0517 | 13.7463      |
| Red. masses --                                         | 9.7489    | 6.4223  | 6.1187       |
| ZERO-POINT CORRECTION= 0.769051 (HARTREE/<br>PARTICLE) |           |         |              |
| Thermal correction to Energy=                          |           |         | 0.836436     |
| Thermal correction to Enthalpy=                        |           |         | 0.837491     |
| Thermal correction to Gibbs Free Energy=               |           |         | 0.653694     |
| Sum of electronic and zero-point Energies=             |           |         | -3237.150946 |
| Sum of electronic and thermal Energies=                |           |         | -3237.083560 |
| Sum of electronic and thermal Enthalpies=              |           |         | -3237.082505 |
| Sum of electronic and thermal Free Energies=           |           |         | -3237.266302 |

| ITEM          | VALUE    | THRESHOLD | CONVERGED? |
|---------------|----------|-----------|------------|
| MAXIMUM FORCE | 0.000016 | 0.000450  | YES        |
| RMS FORCE     | 0.000001 | 0.000300  | YES        |

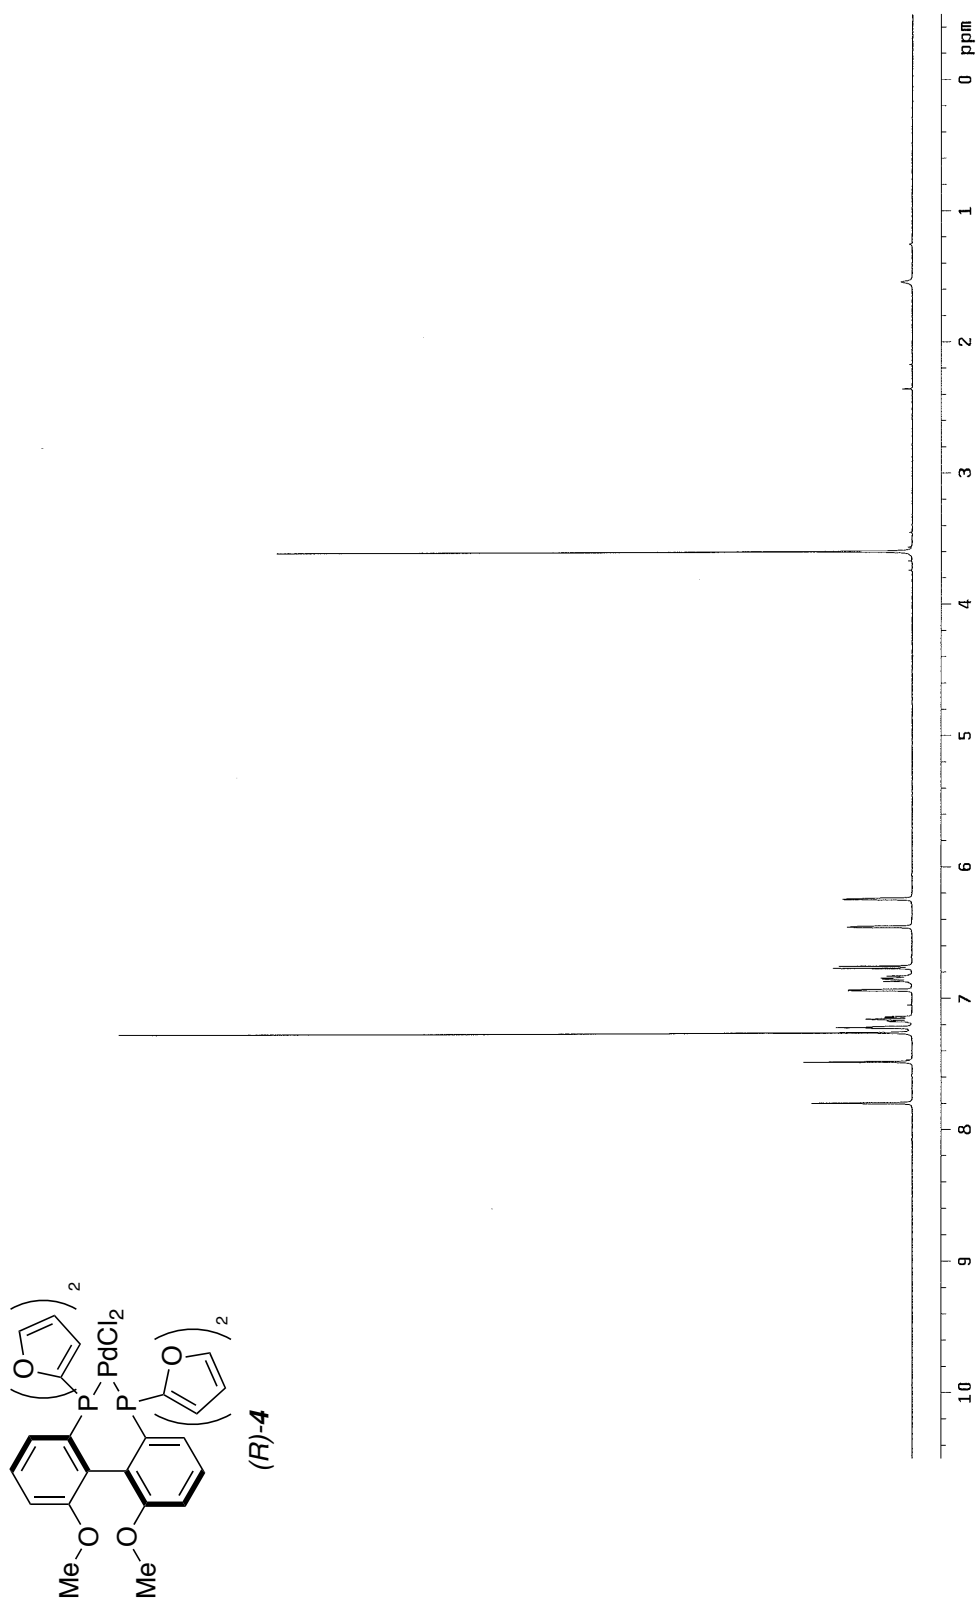

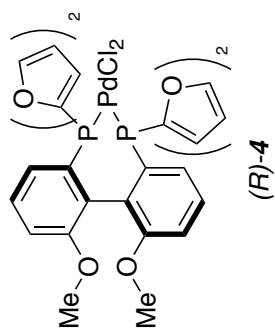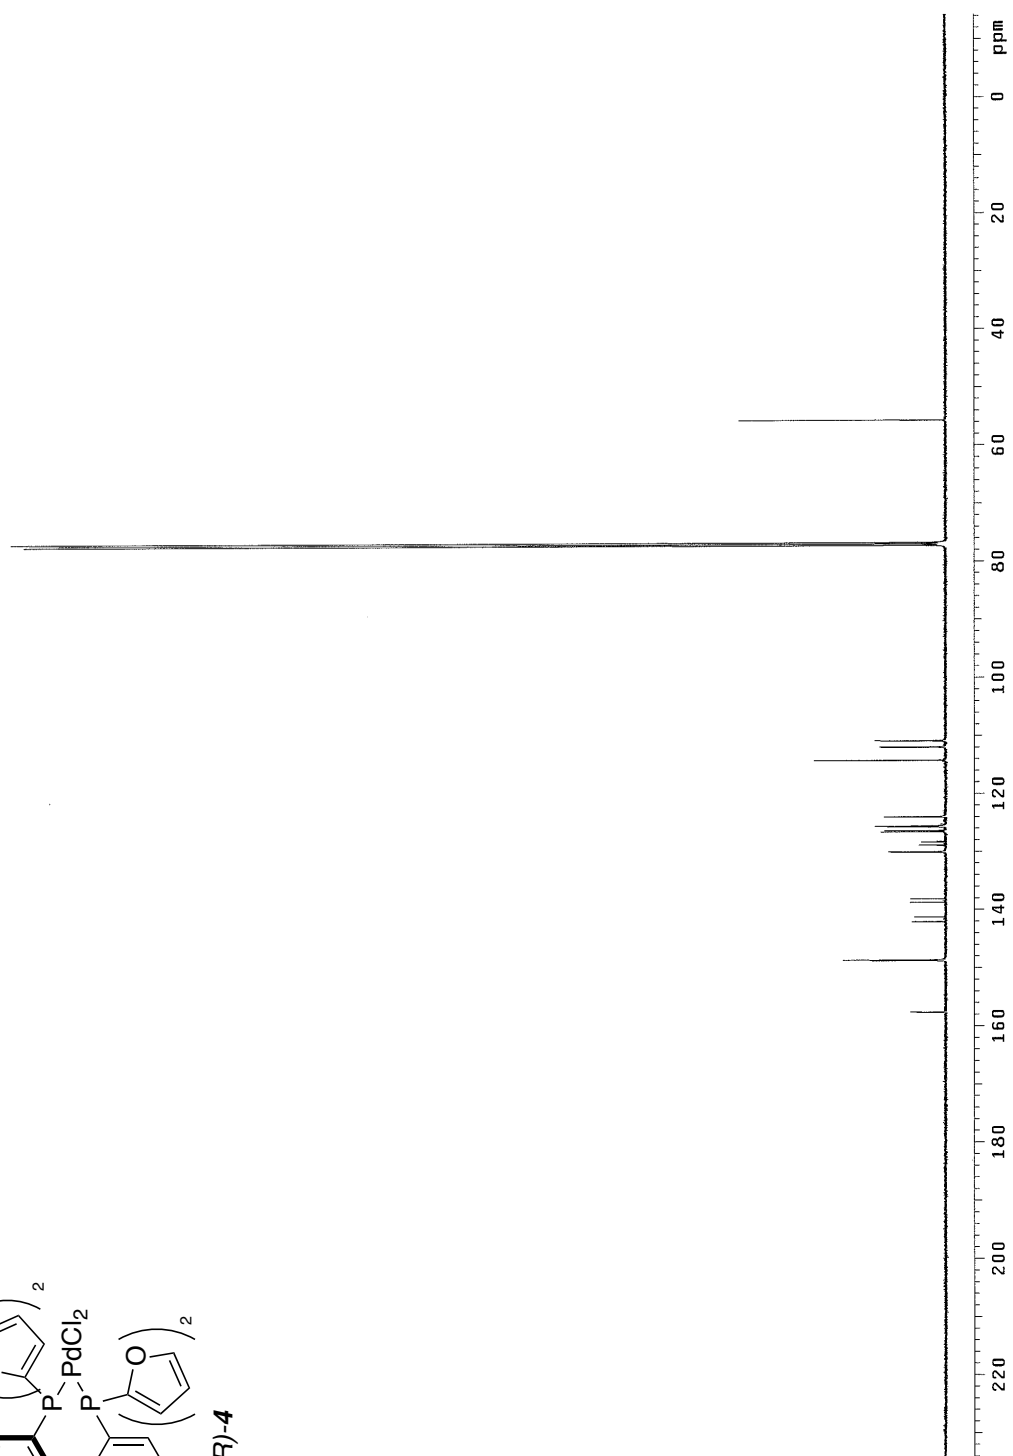



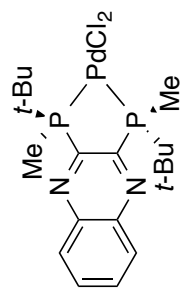

**Compound  
SI-1**

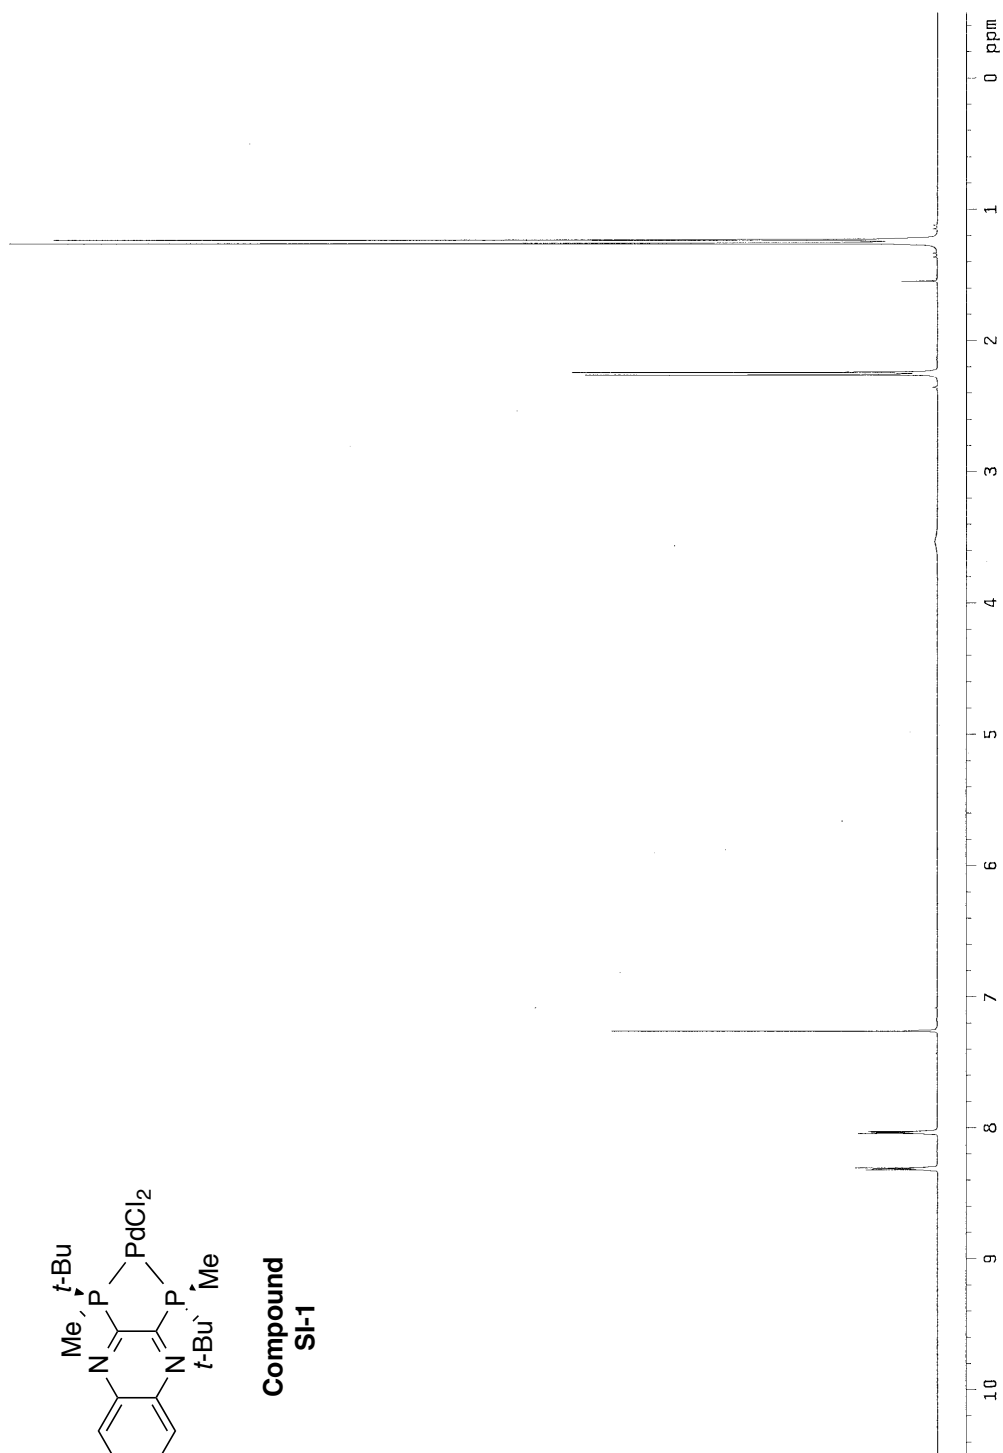

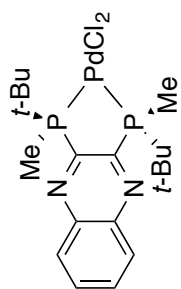

**Compound  
SI-1**

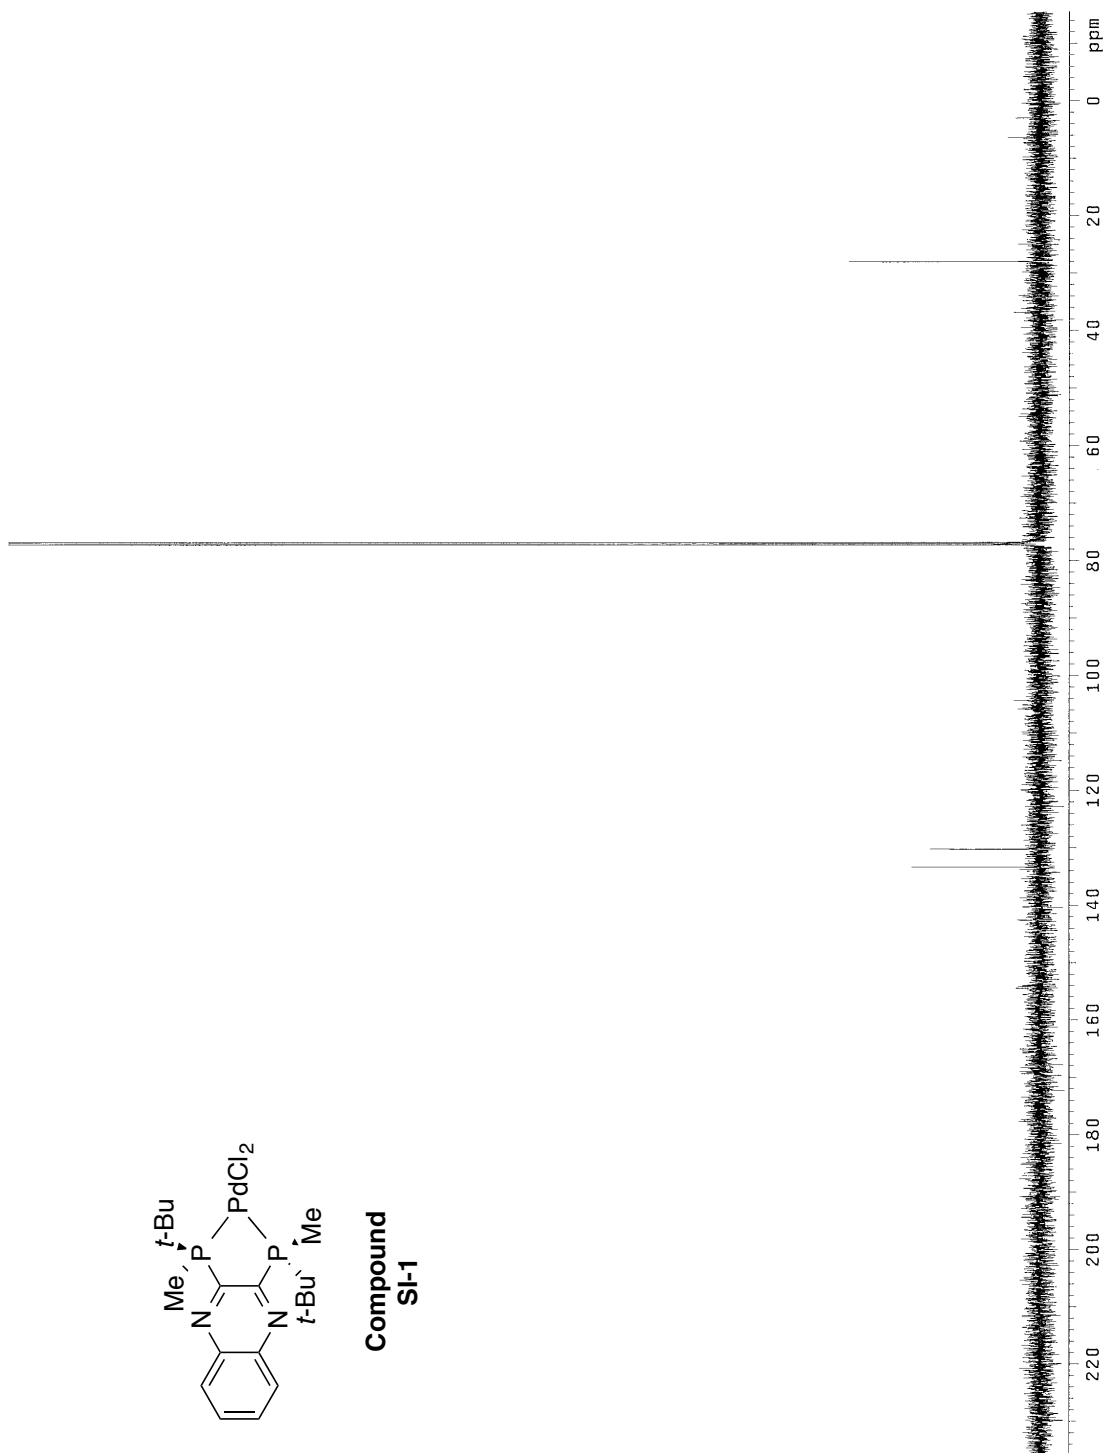

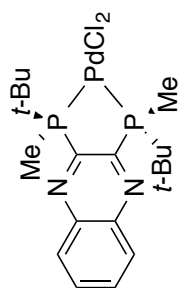

**Compound  
SI-1**

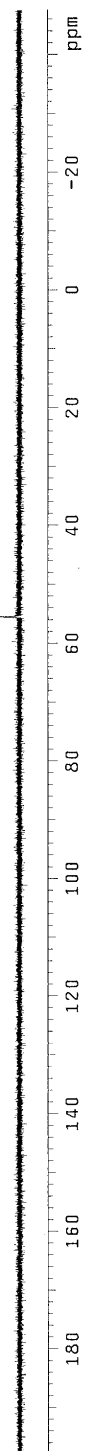

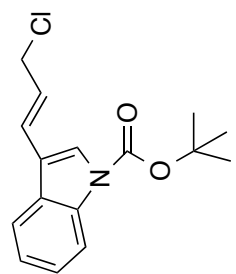

**Compound  
SI-4**

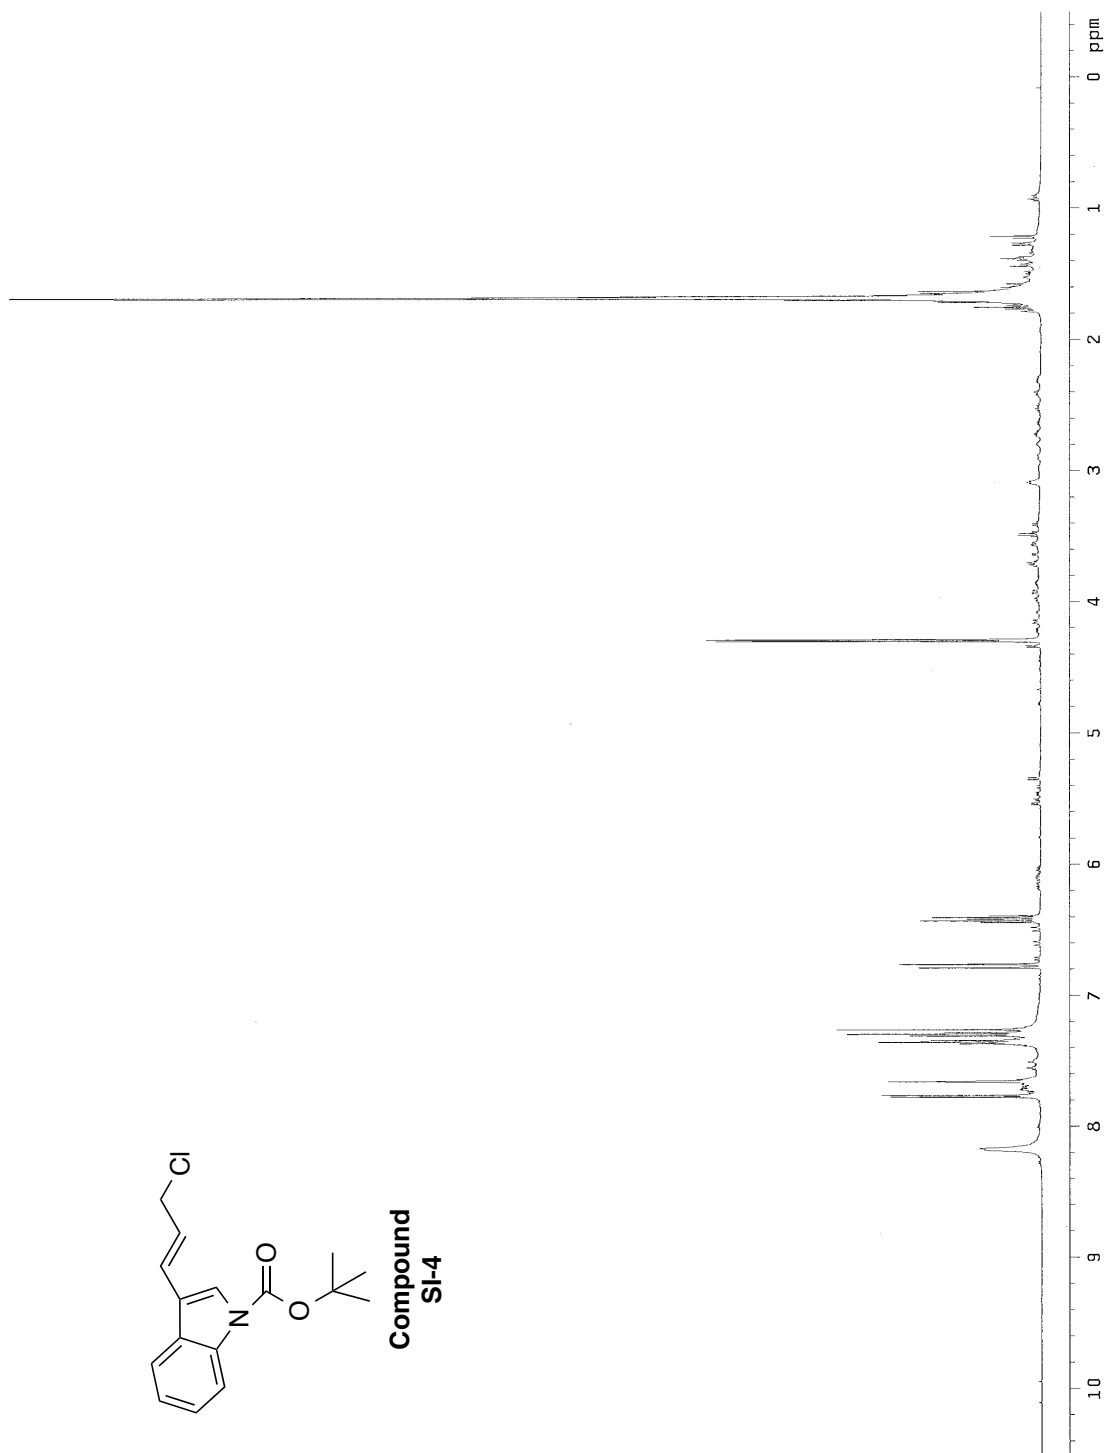

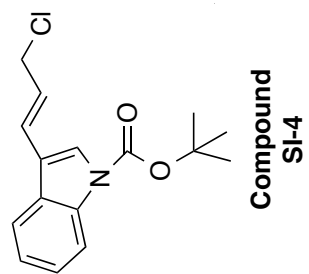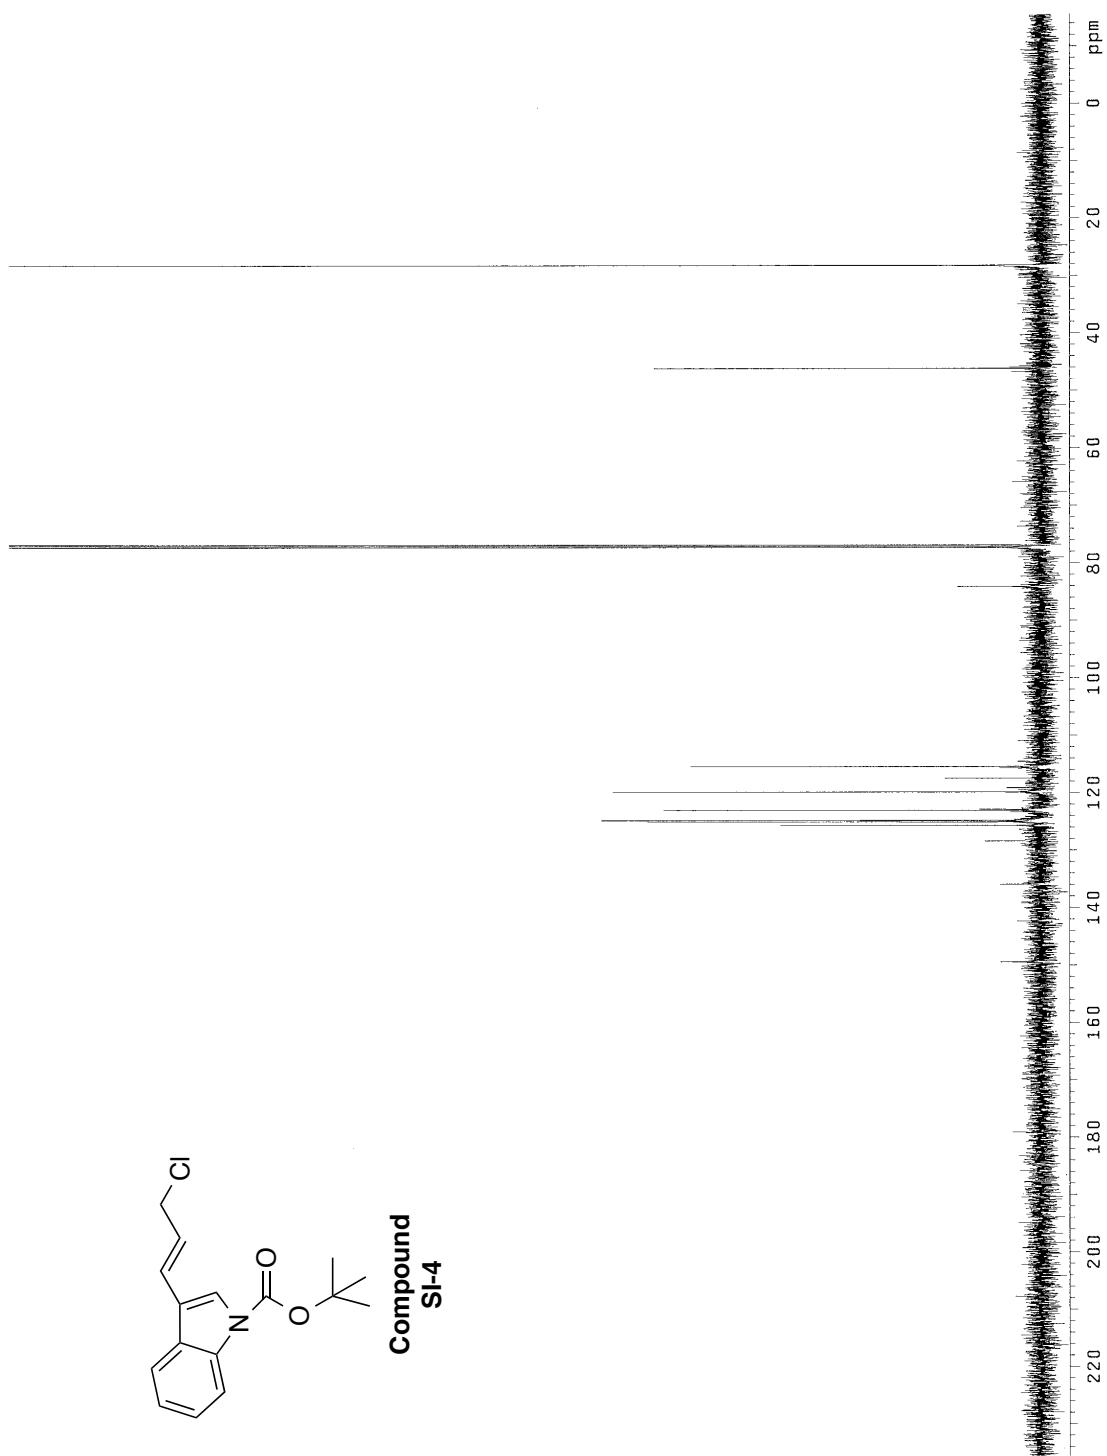

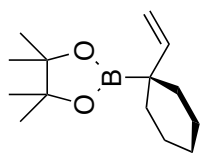

**Compound  
23**

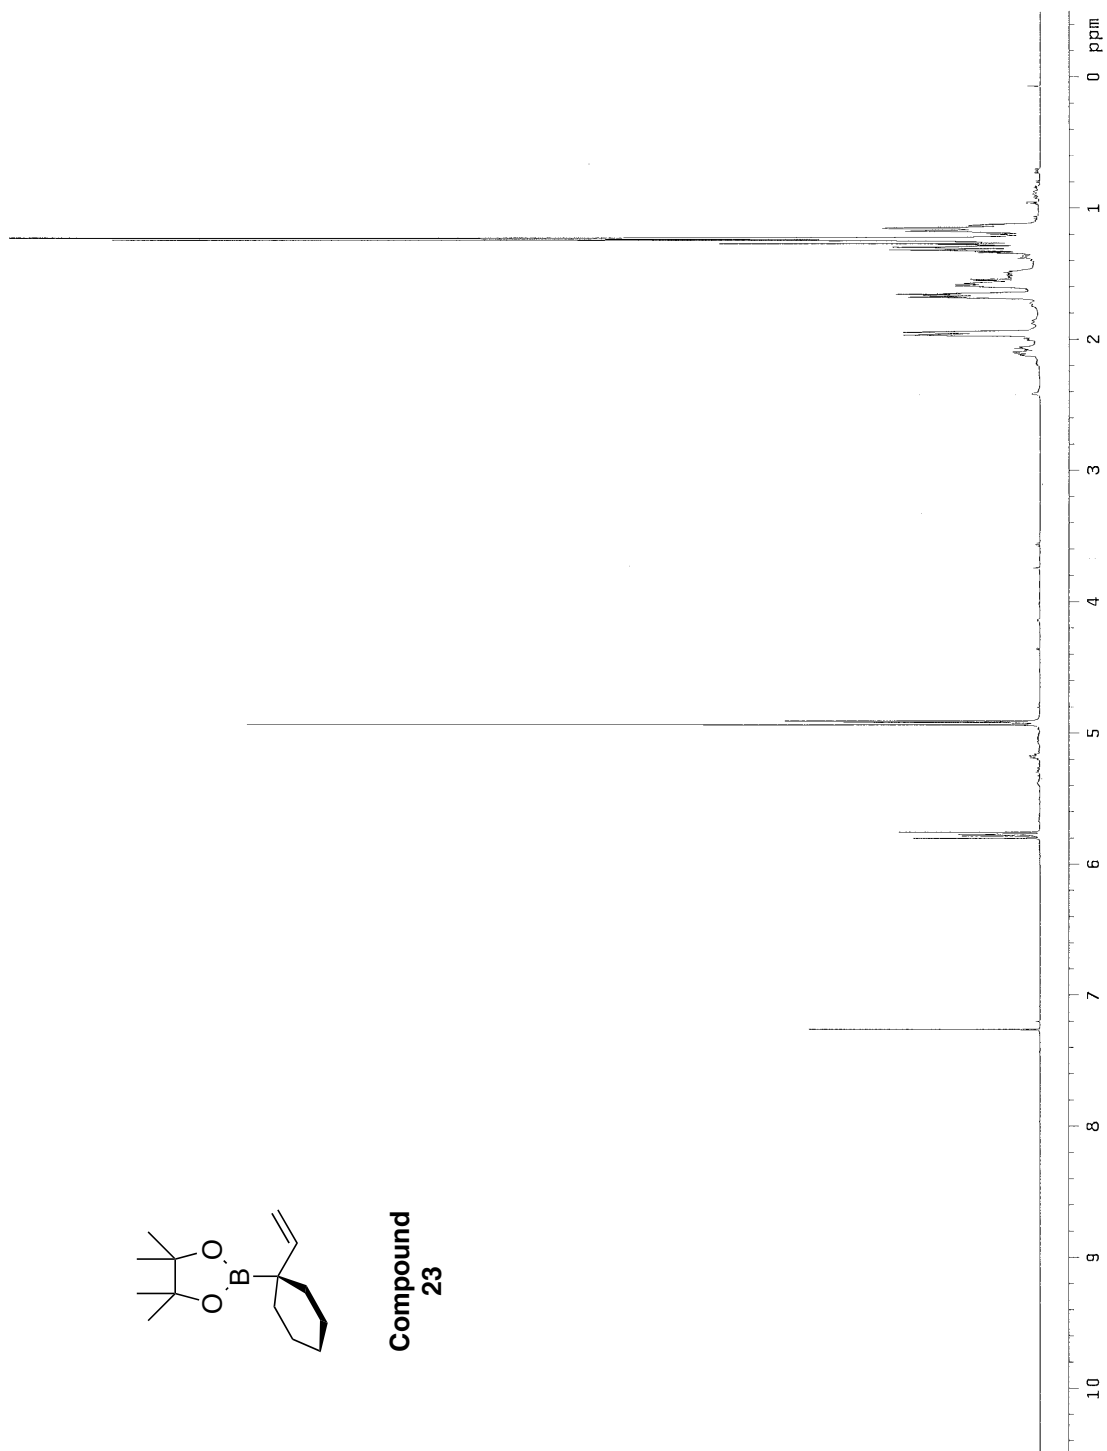

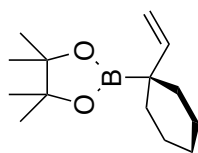

**Compound**  
**23**

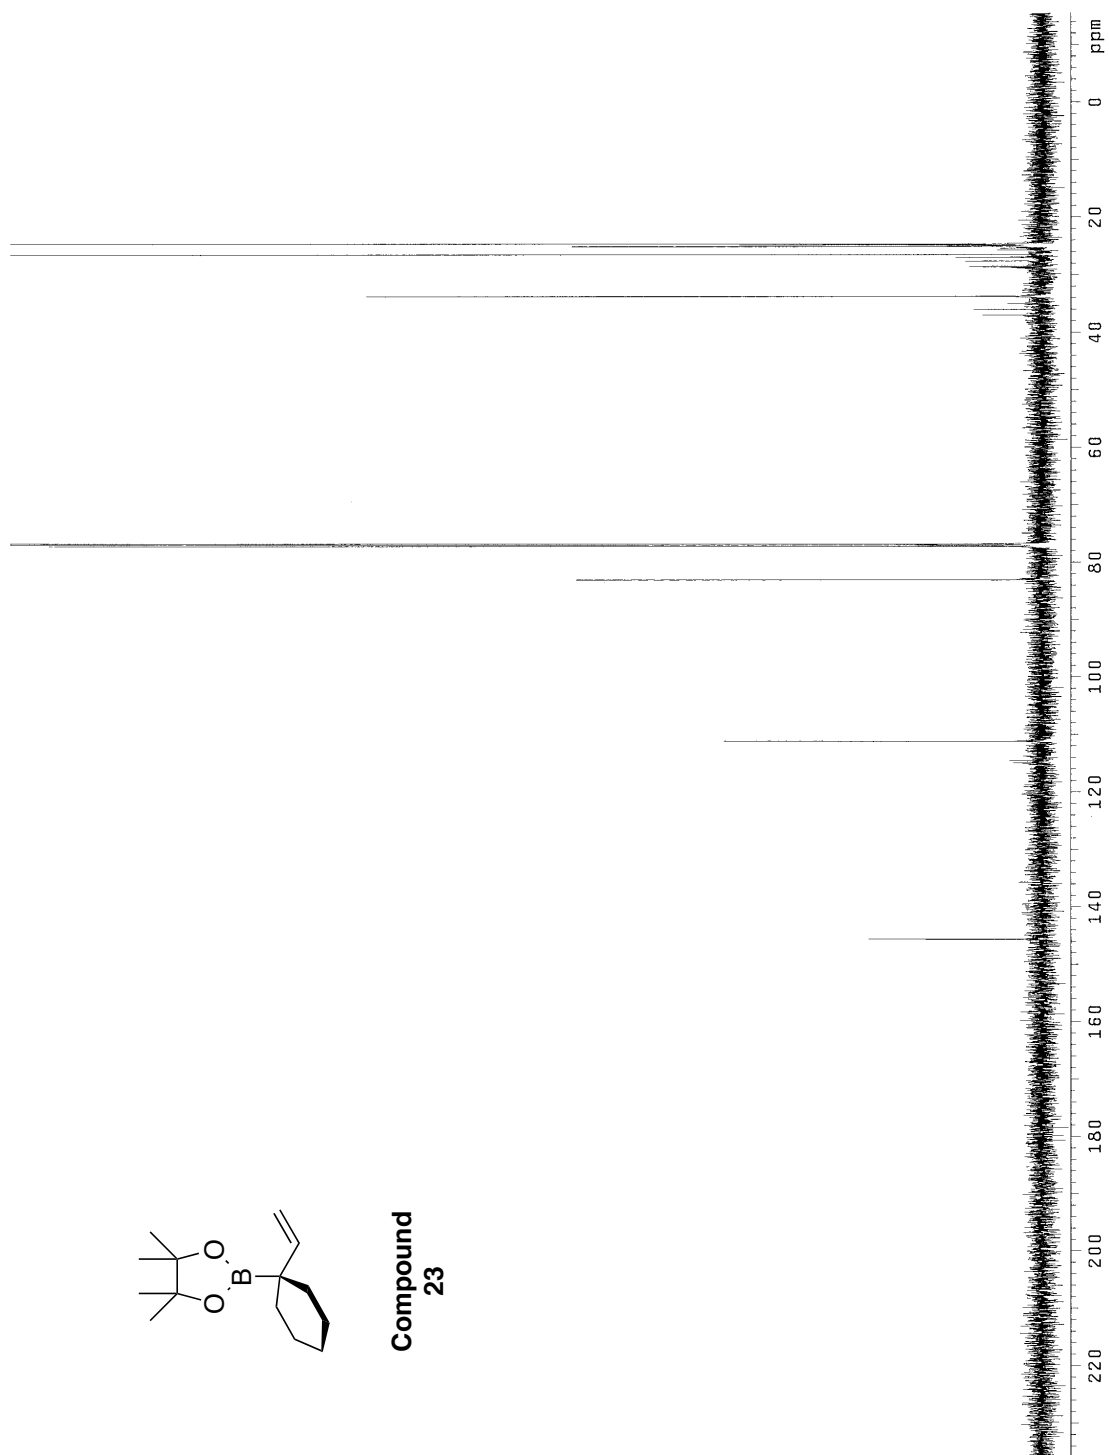

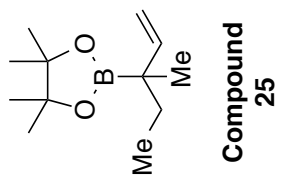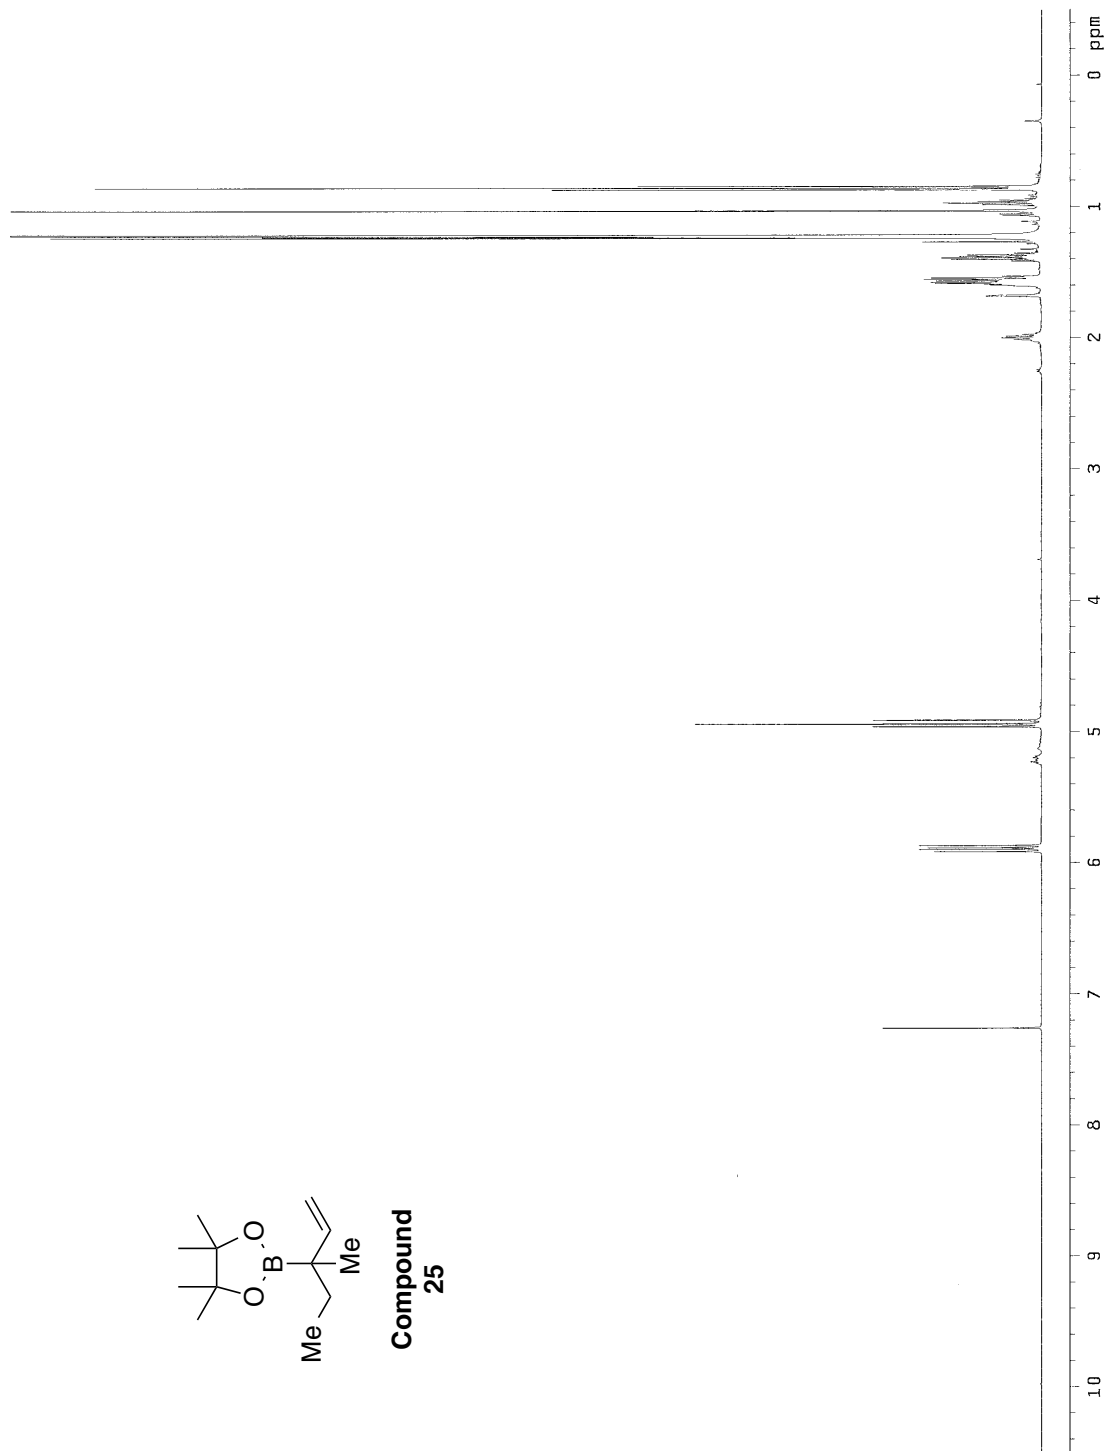



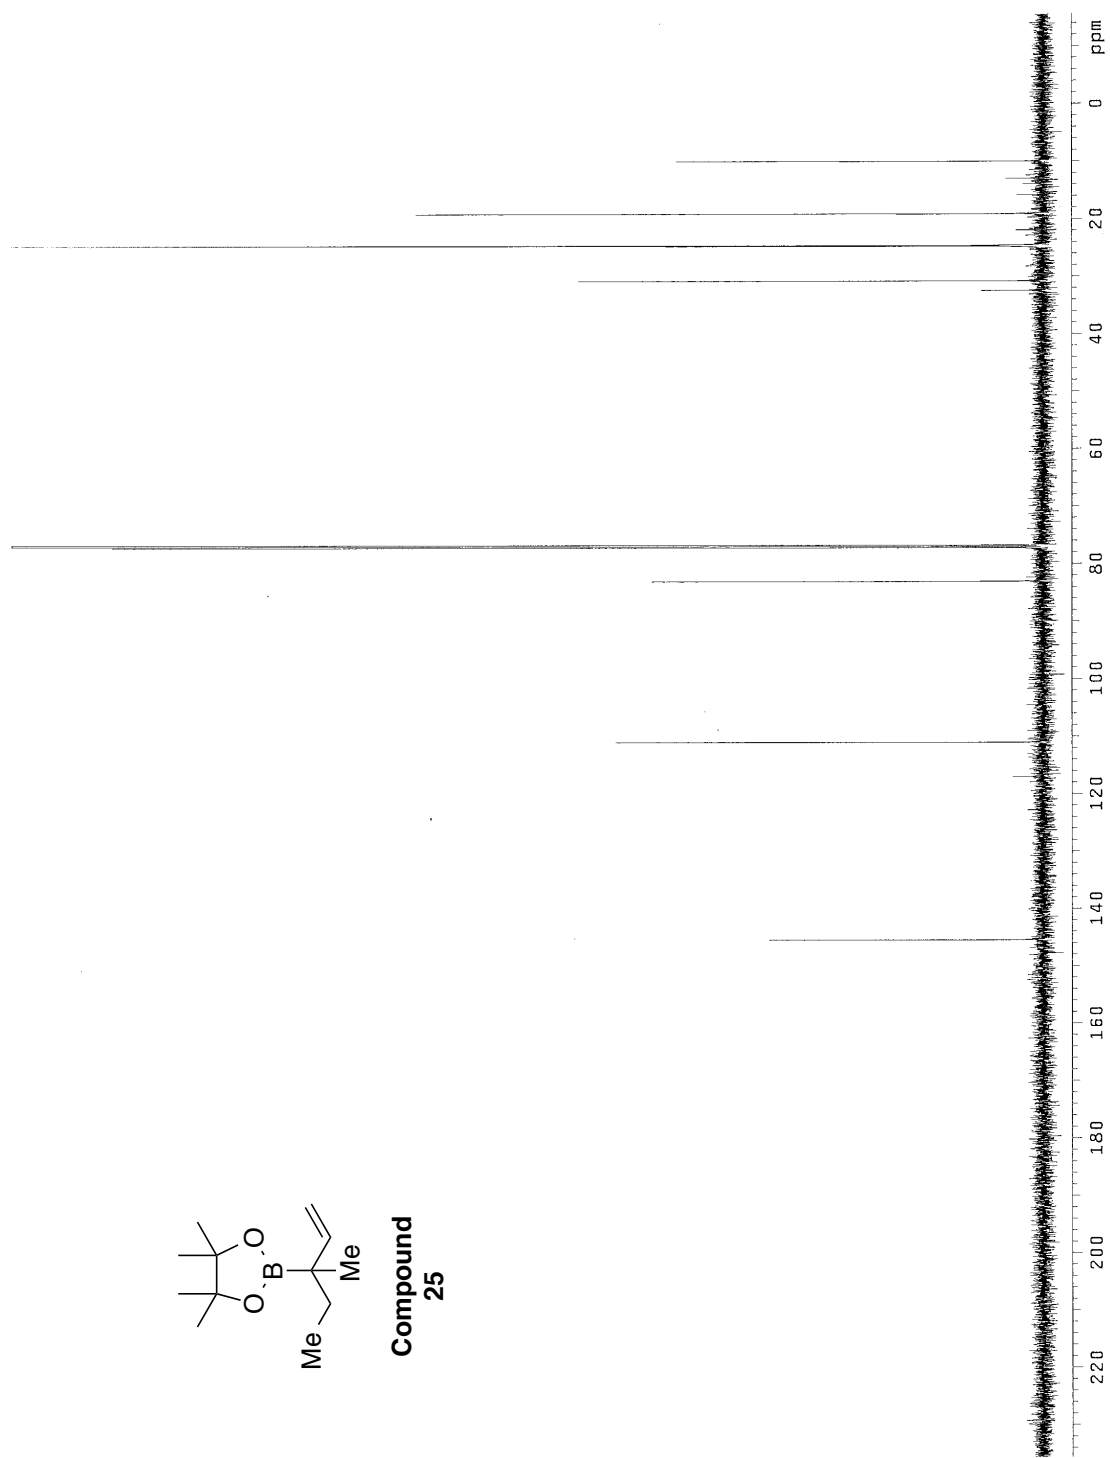

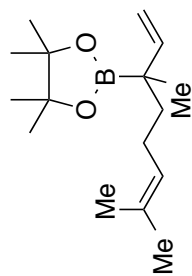

**Compound  
27**

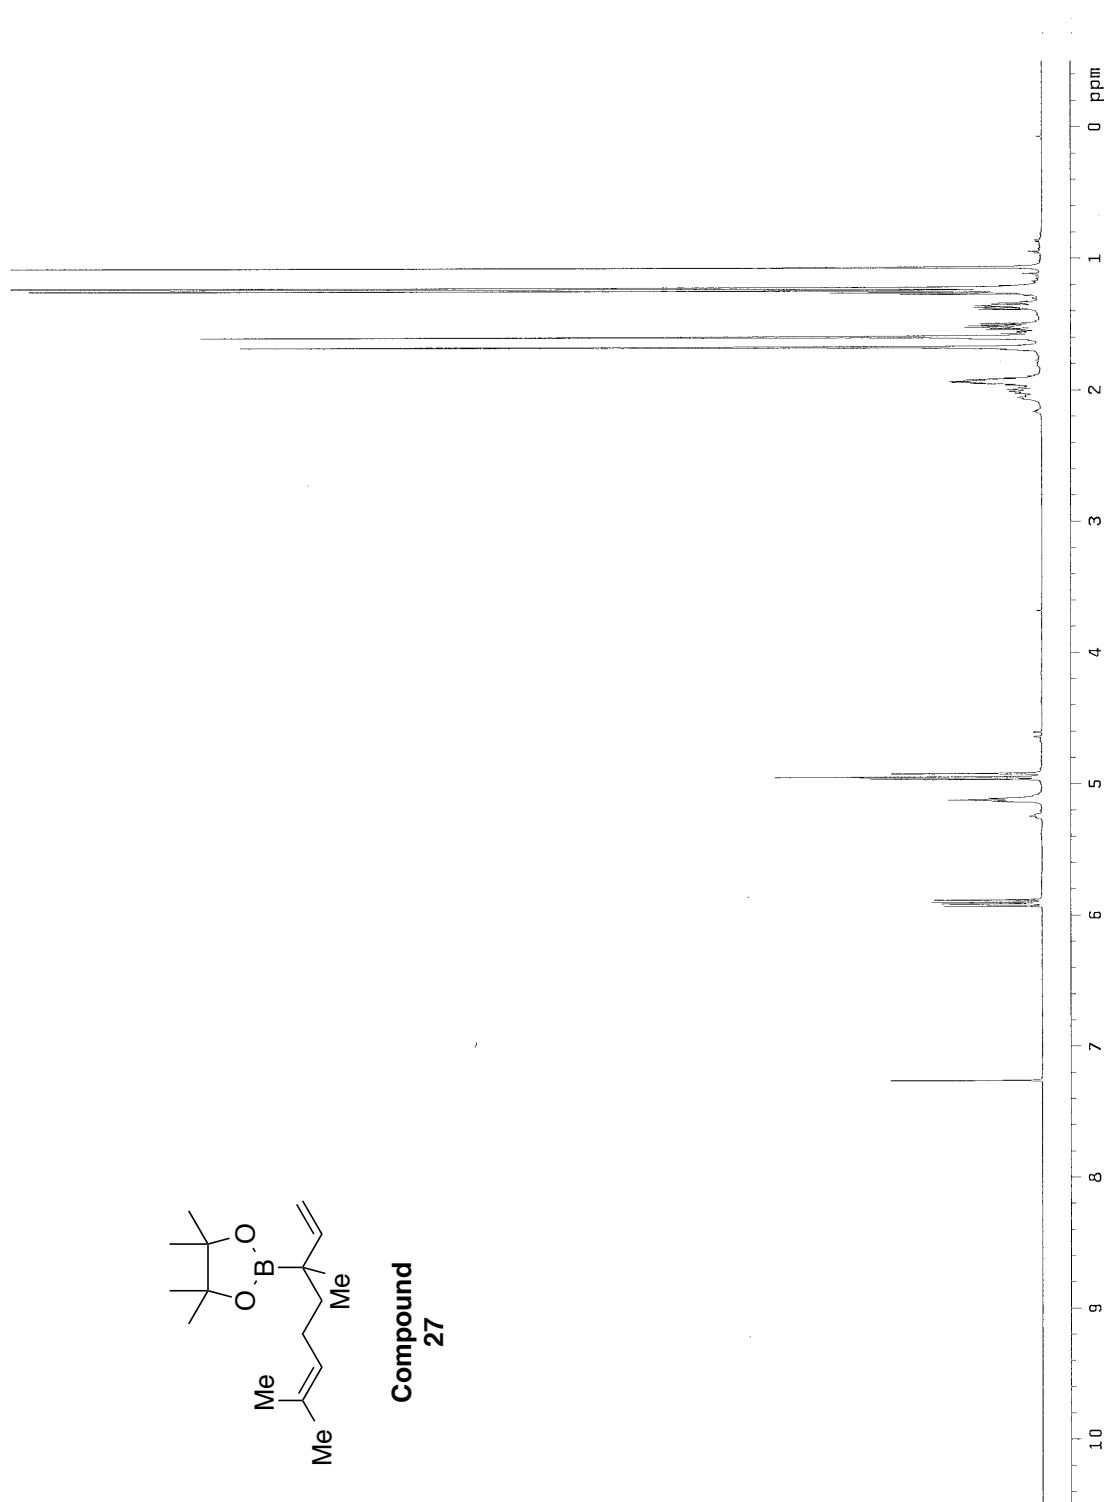

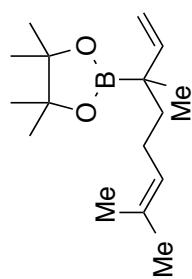

**Compound  
27**

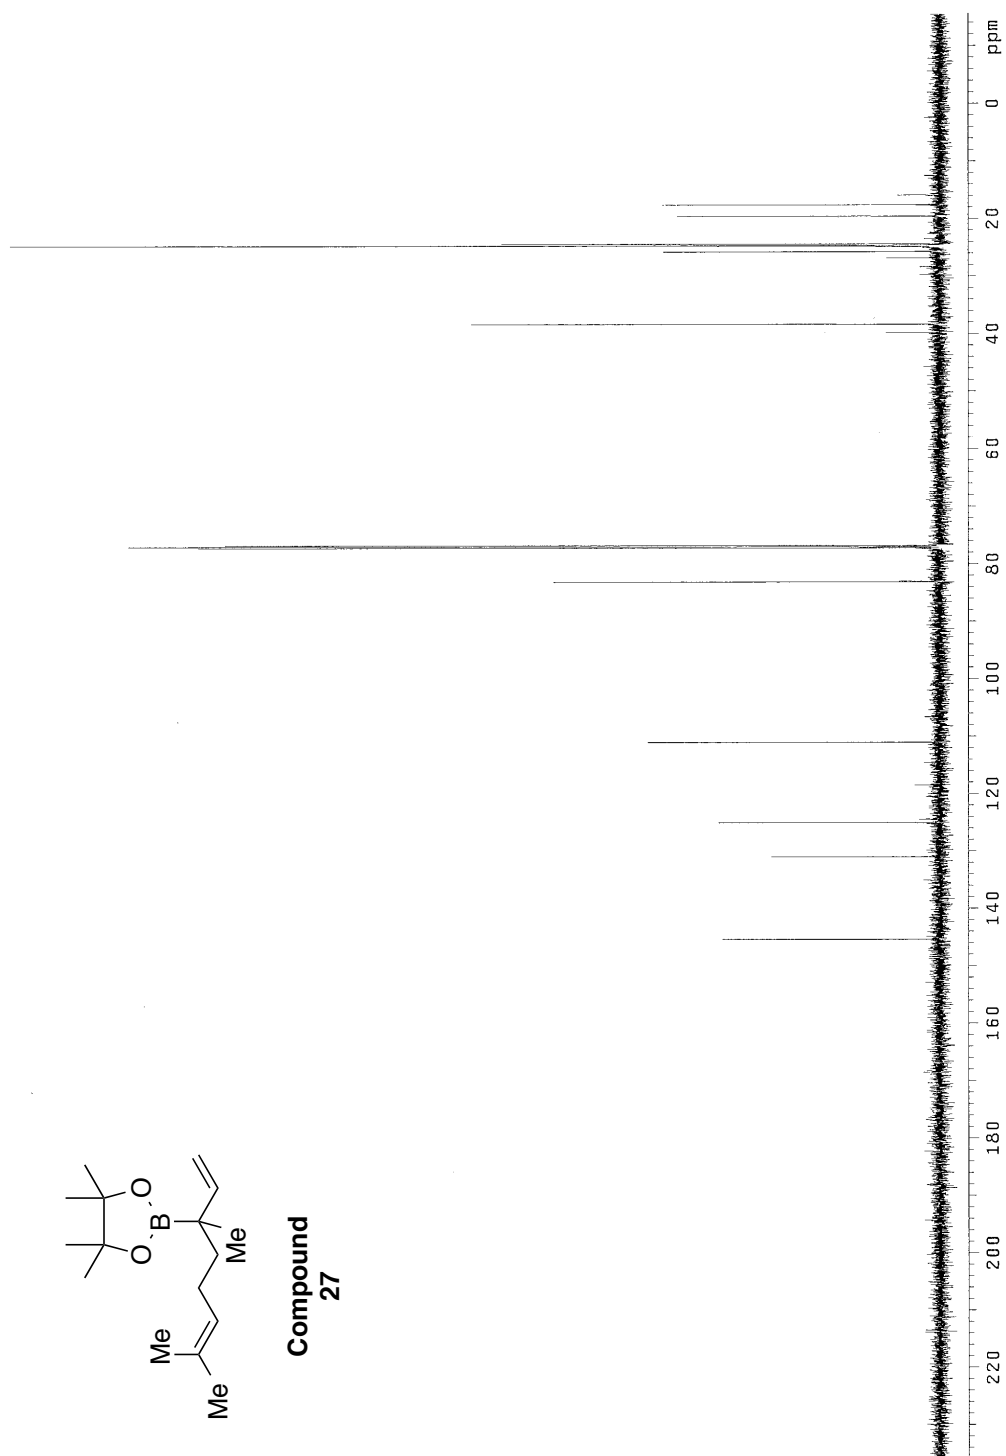

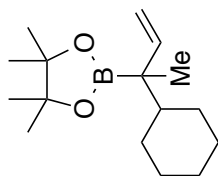

**Compound  
33**

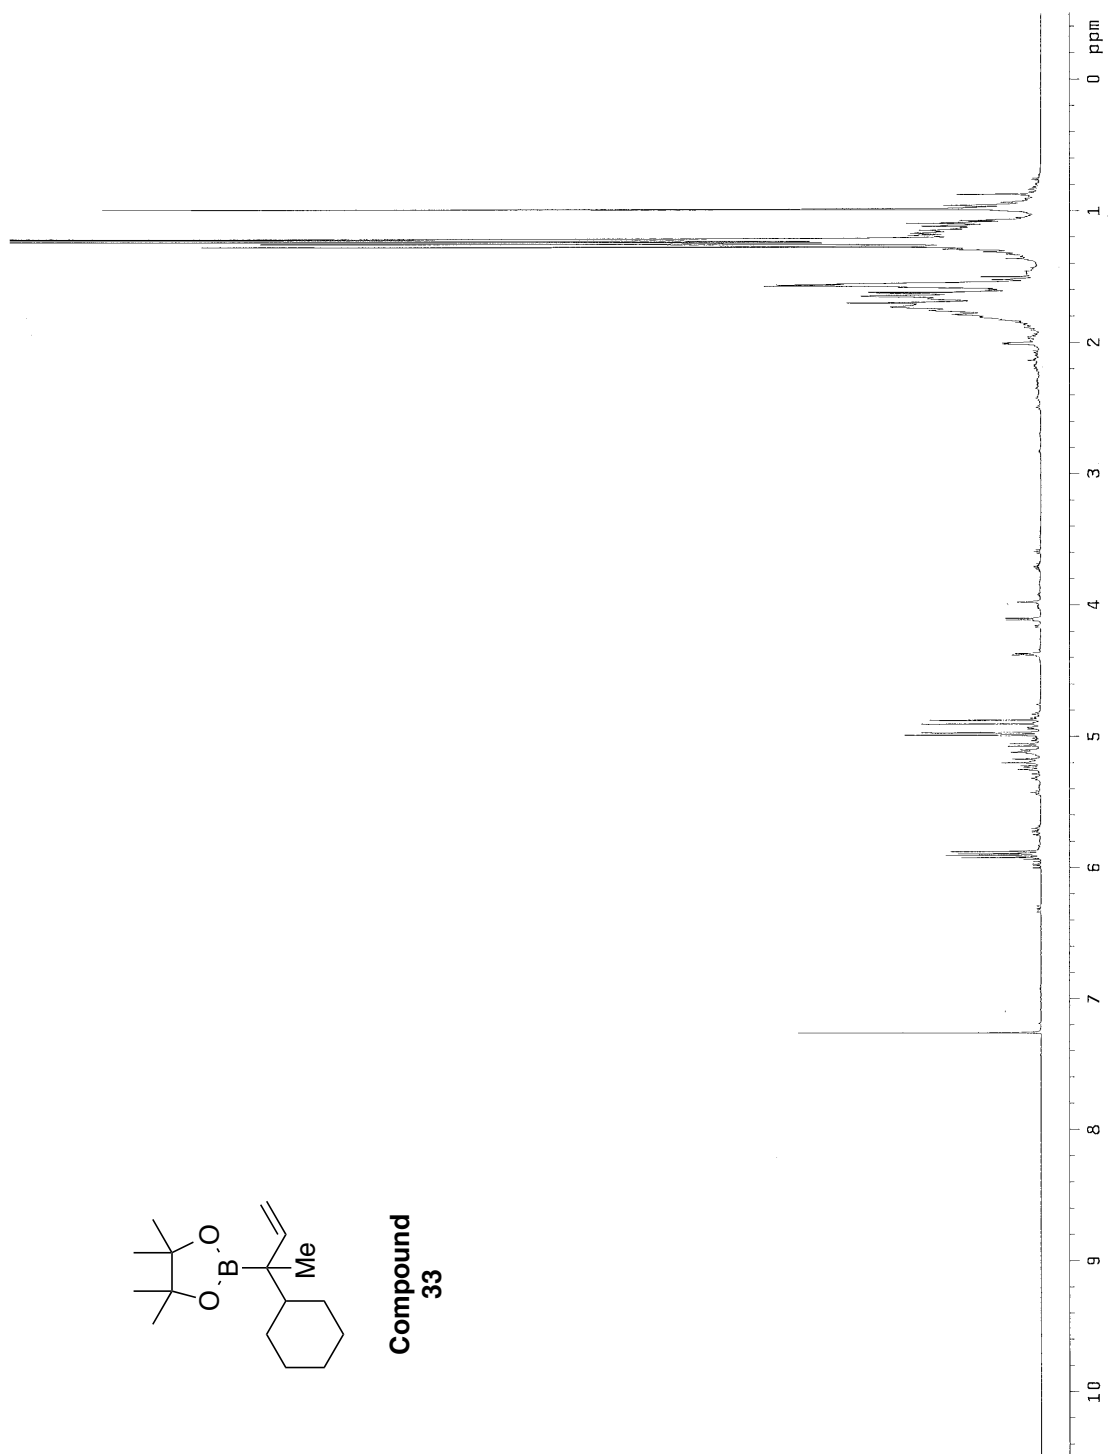



**Compound  
33**

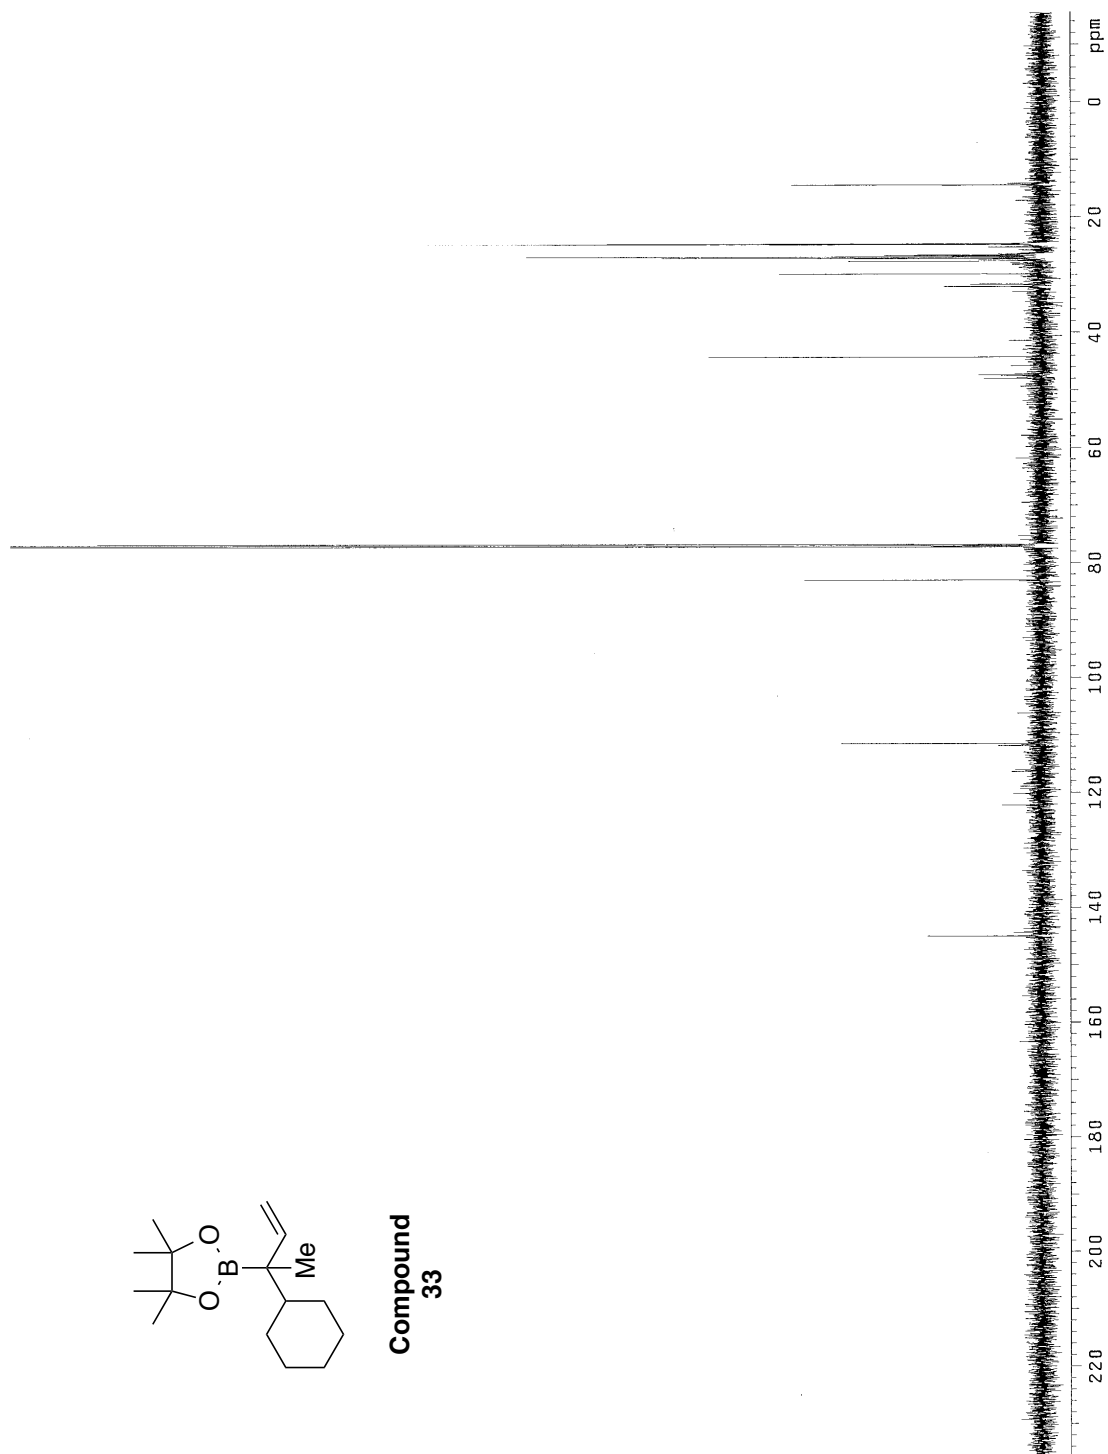

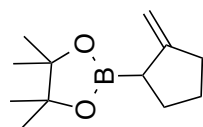

**Compound  
SI-5**

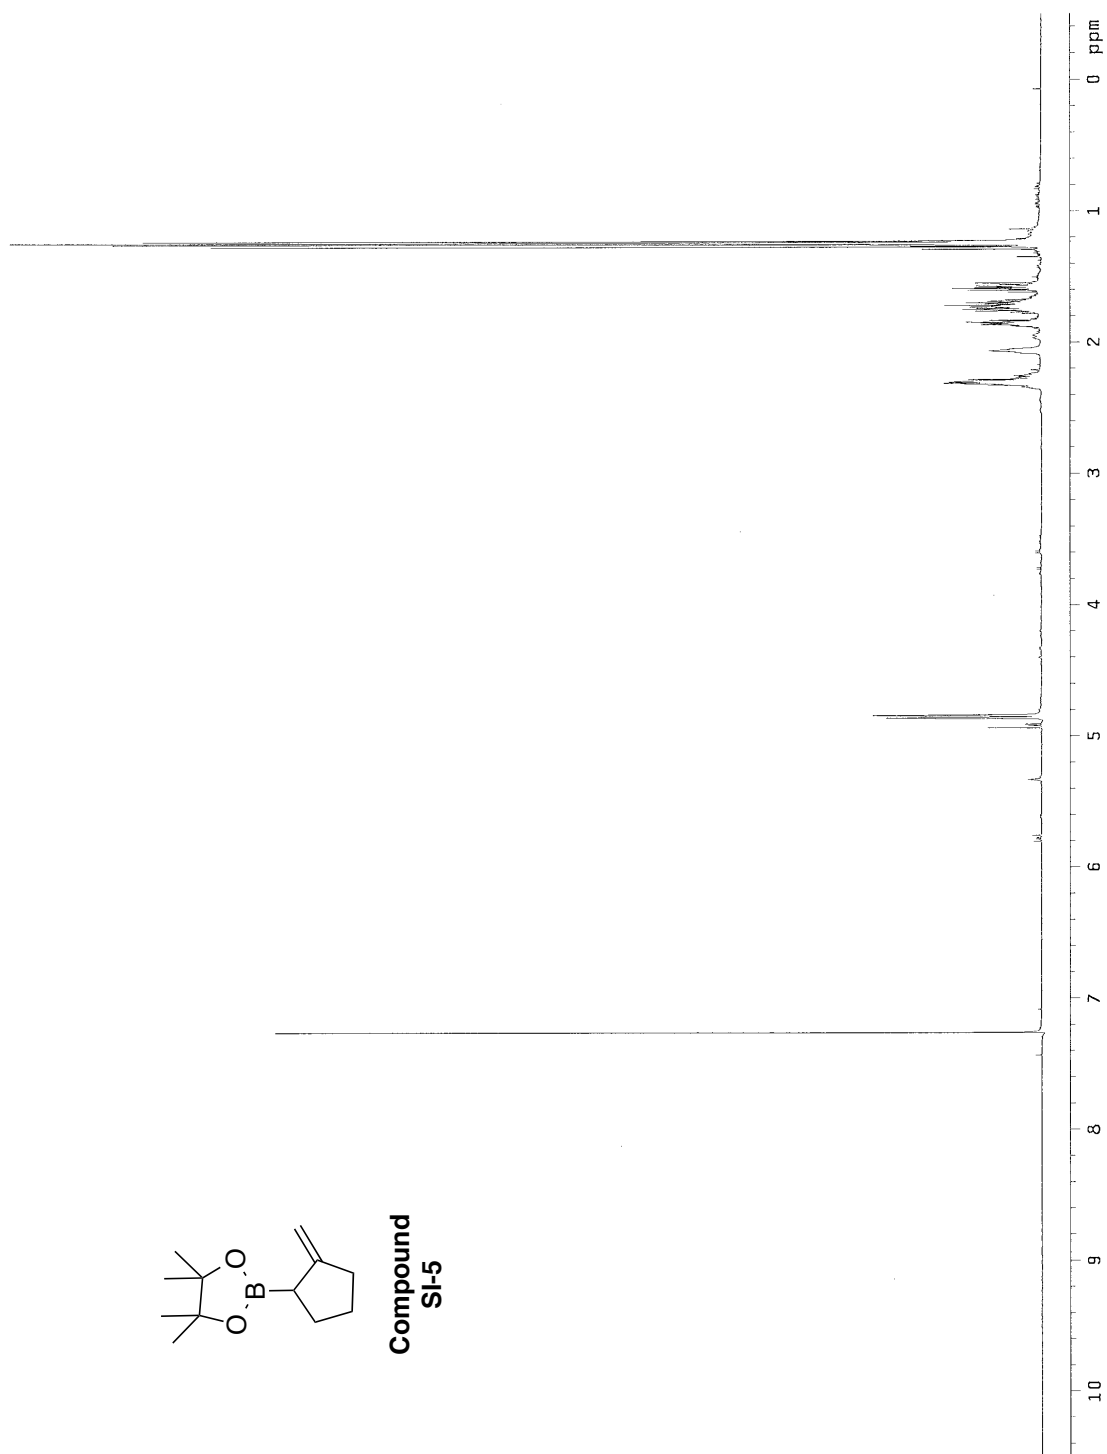



**Compound  
SI-5**

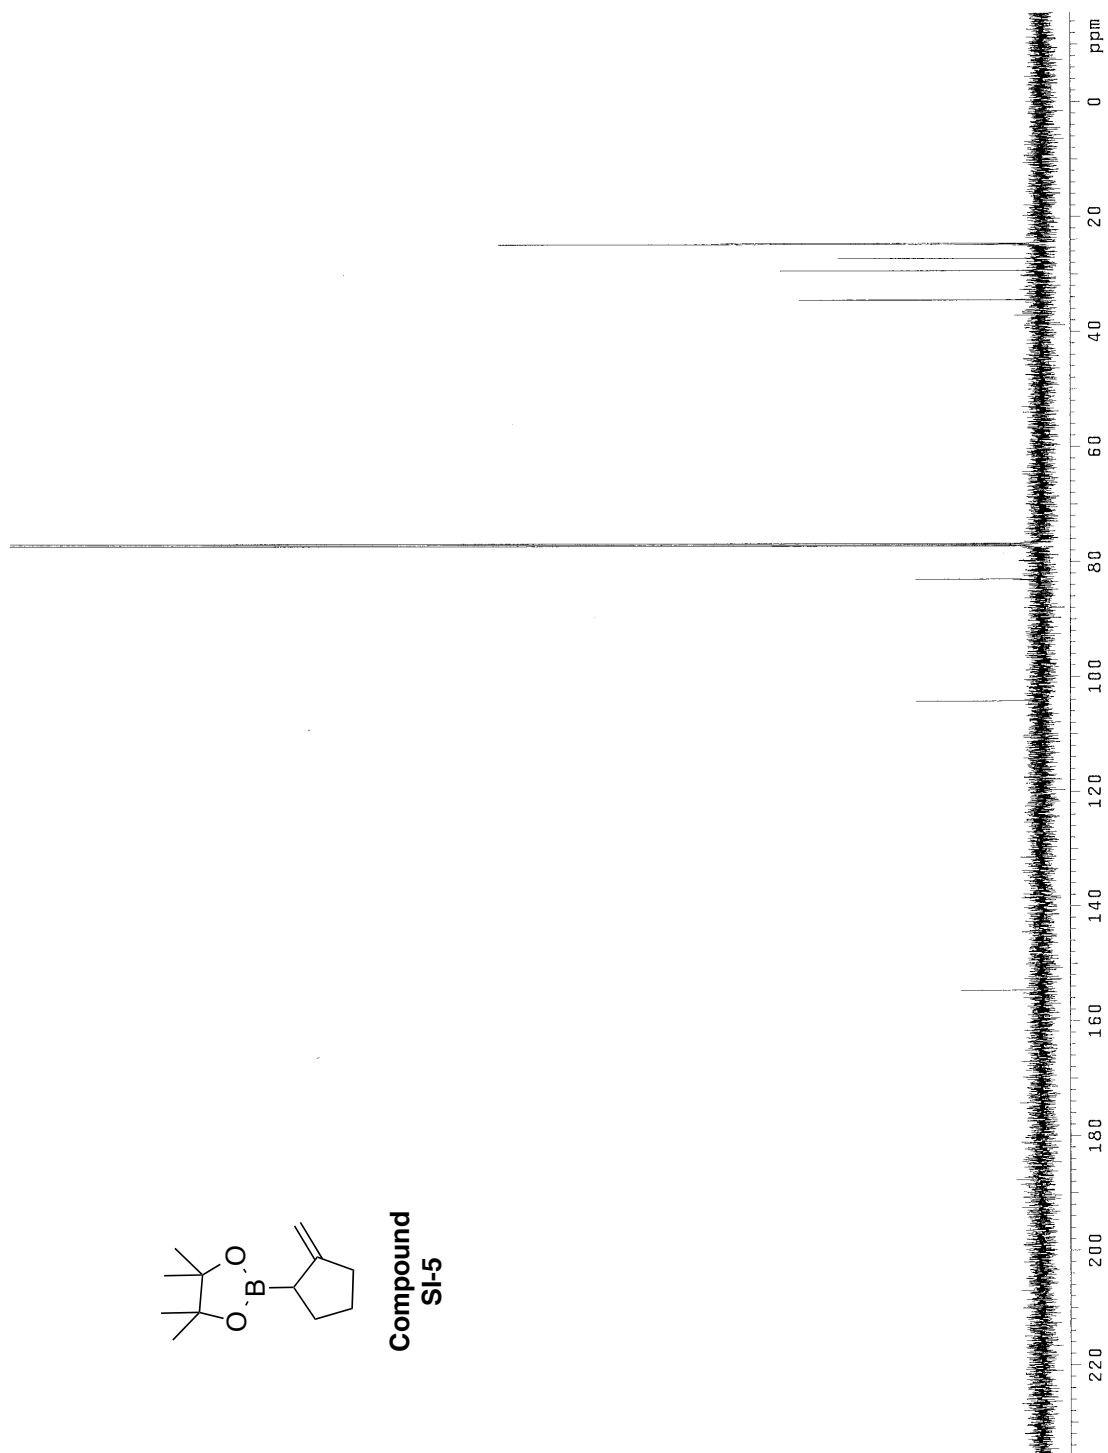

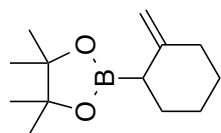

**Compound  
SI-6**

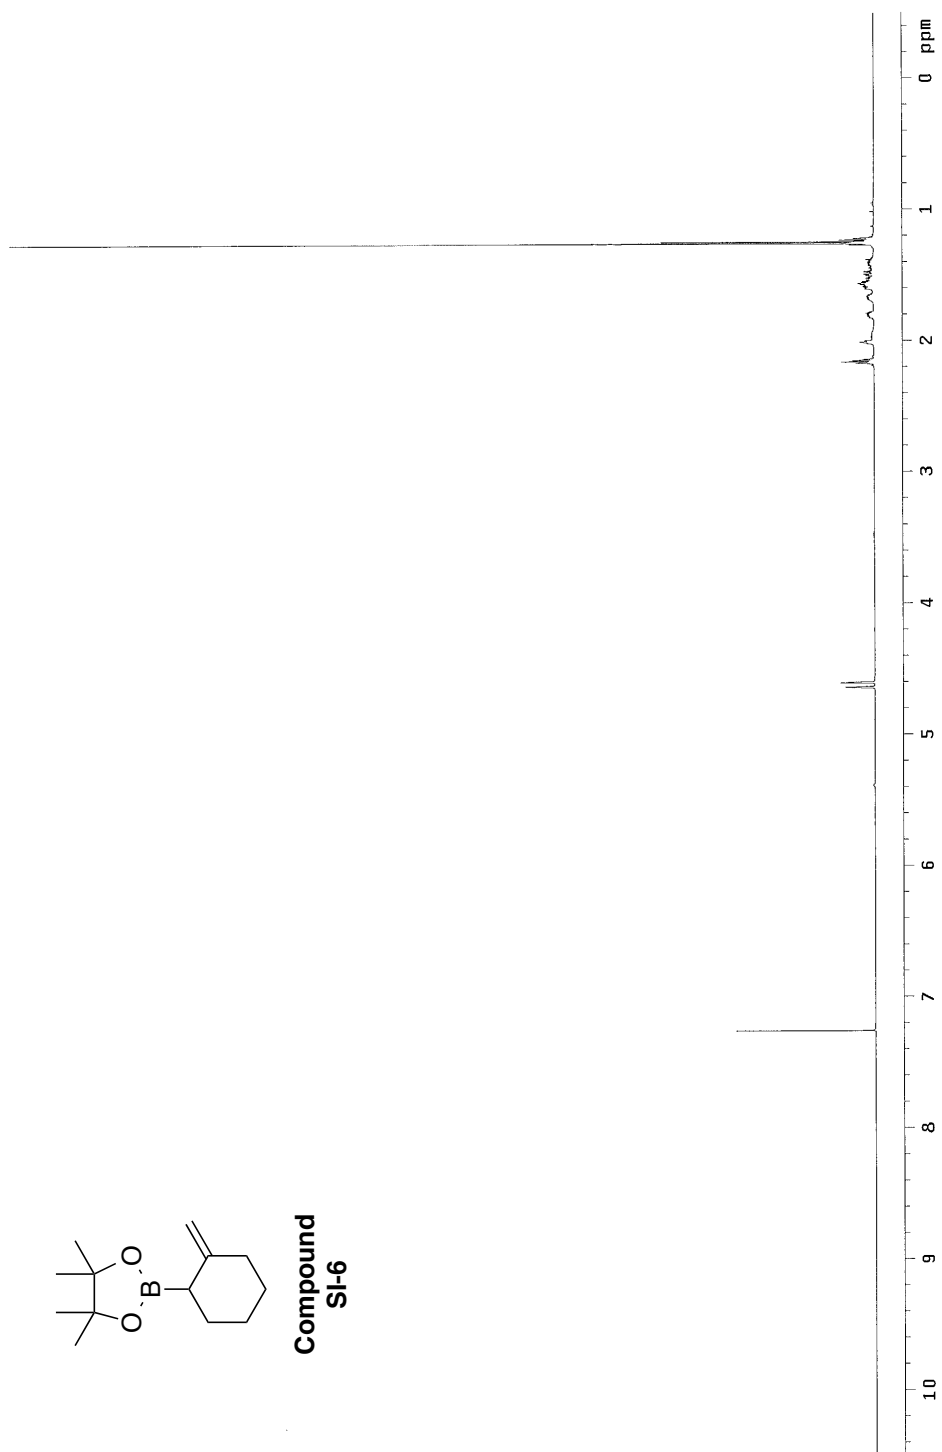



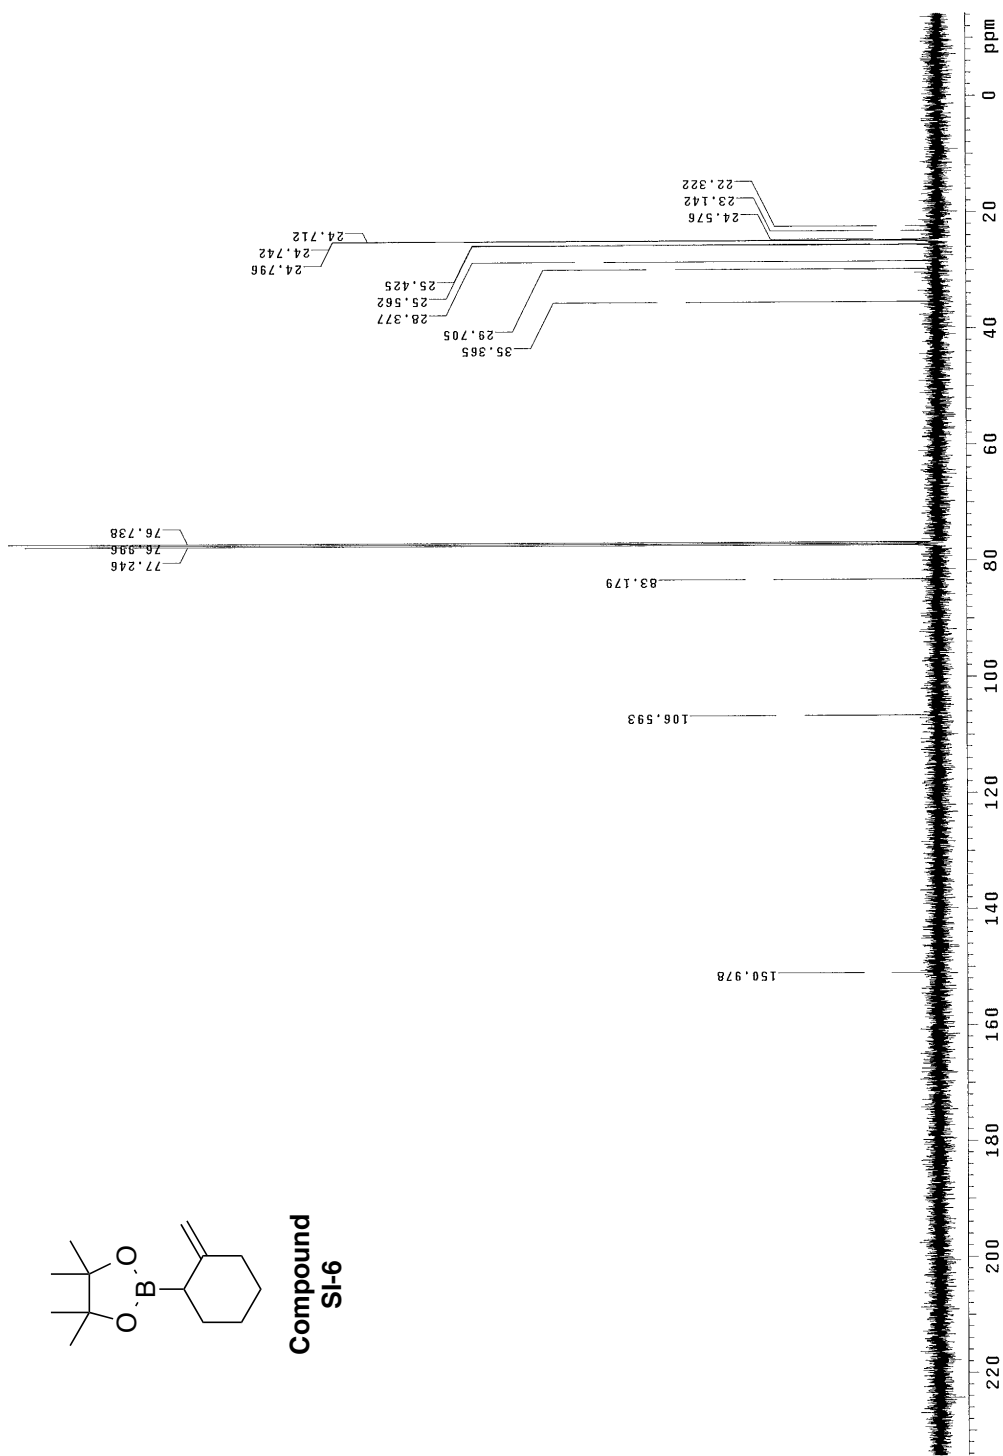

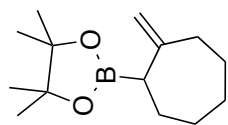

**Compound  
SI-7**

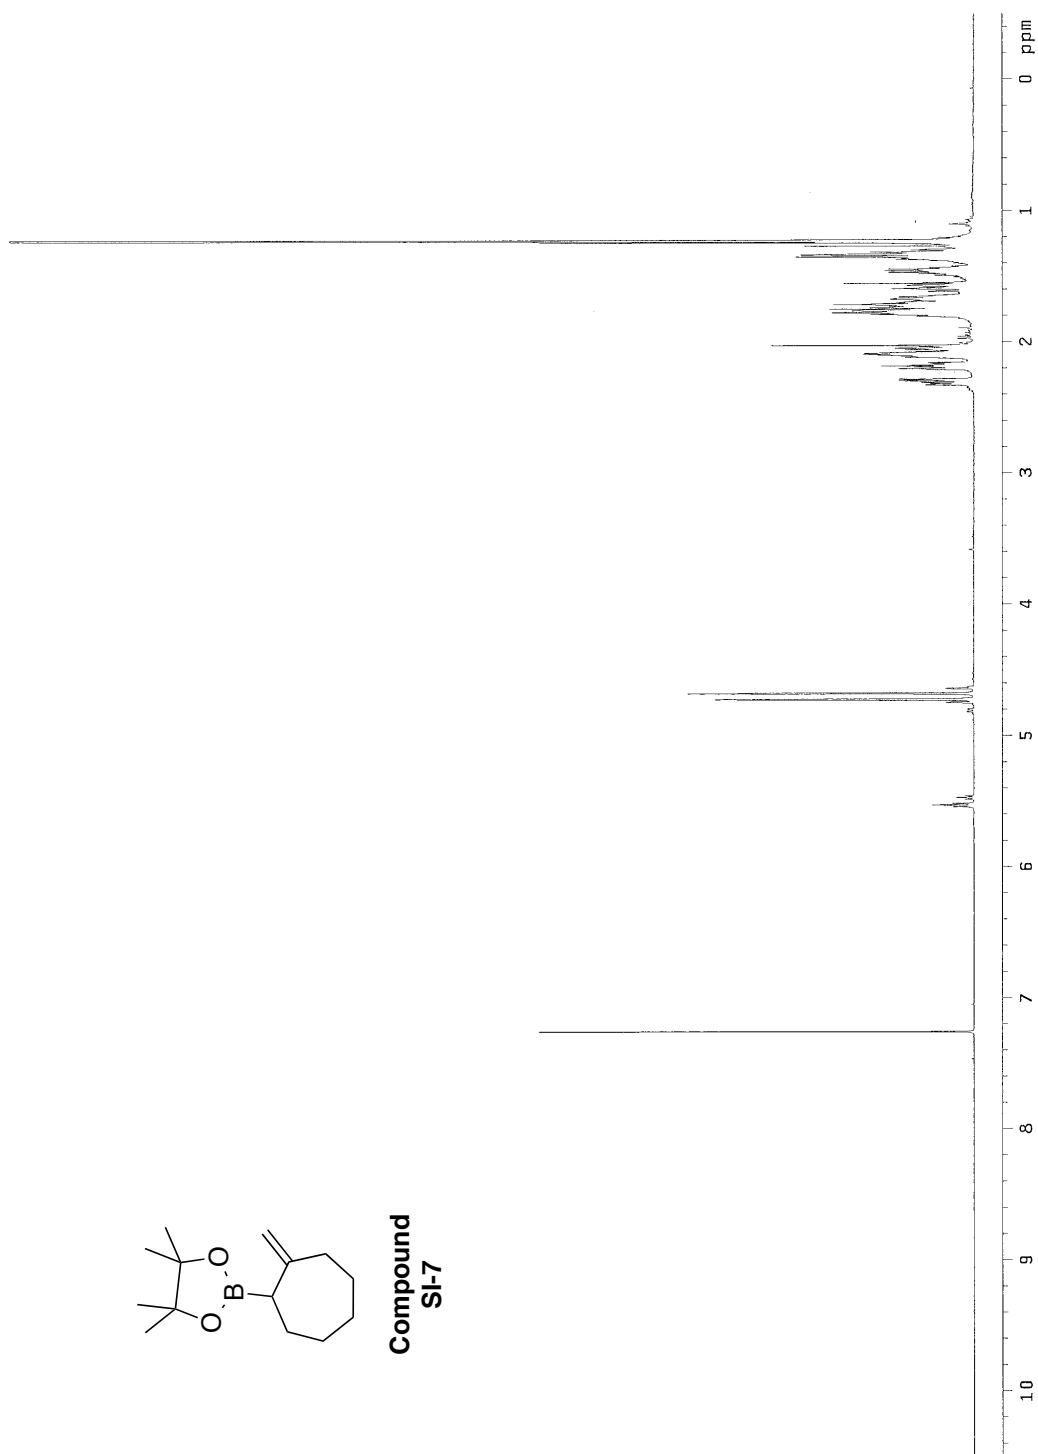

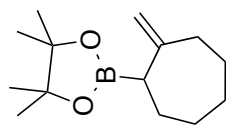

**Compound  
SI-7**

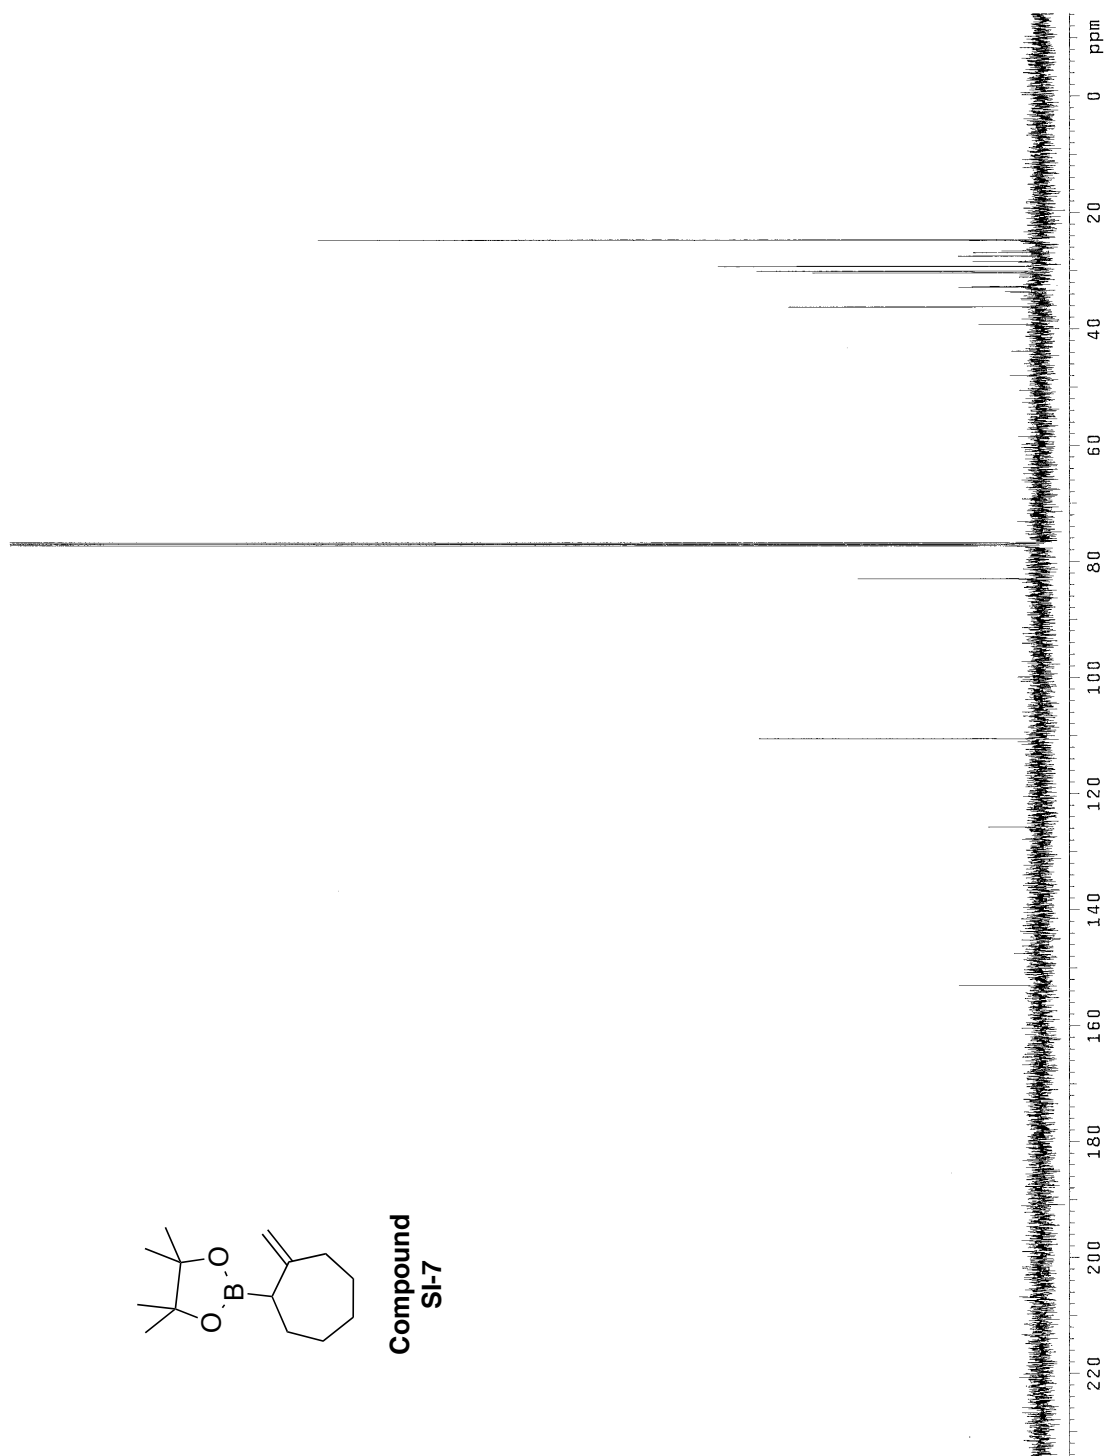

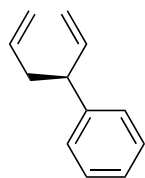

**Compound  
3a**

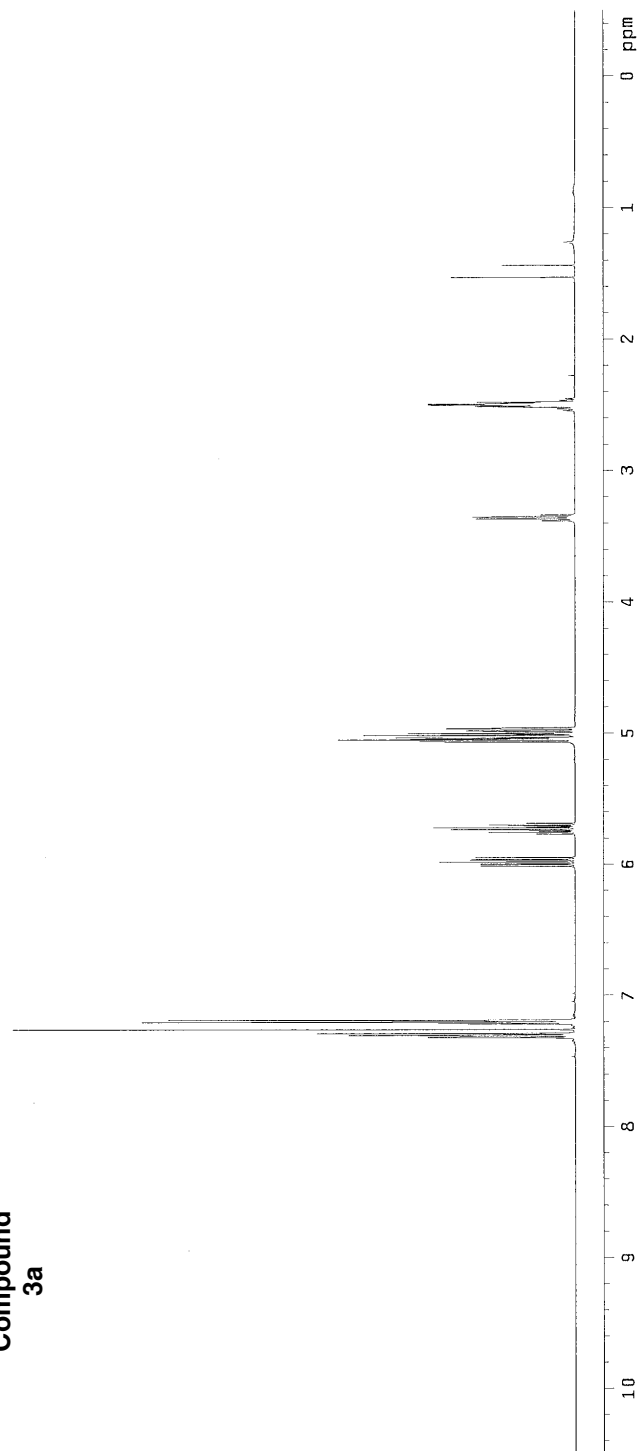

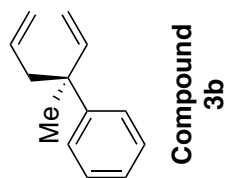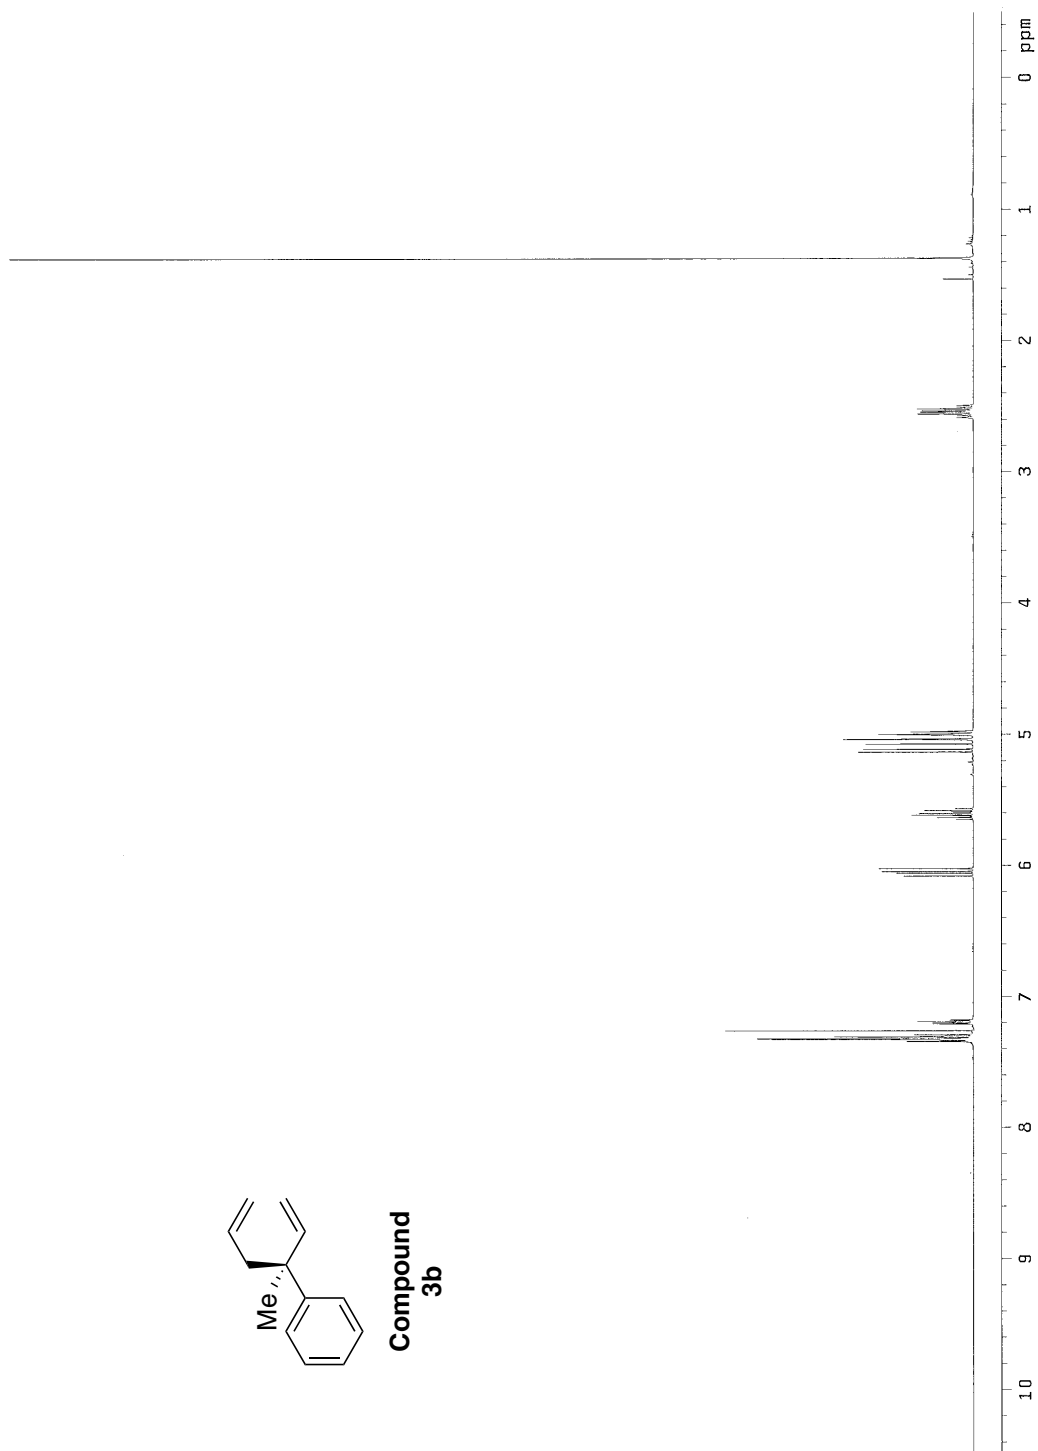

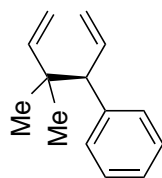

**Compound  
10**

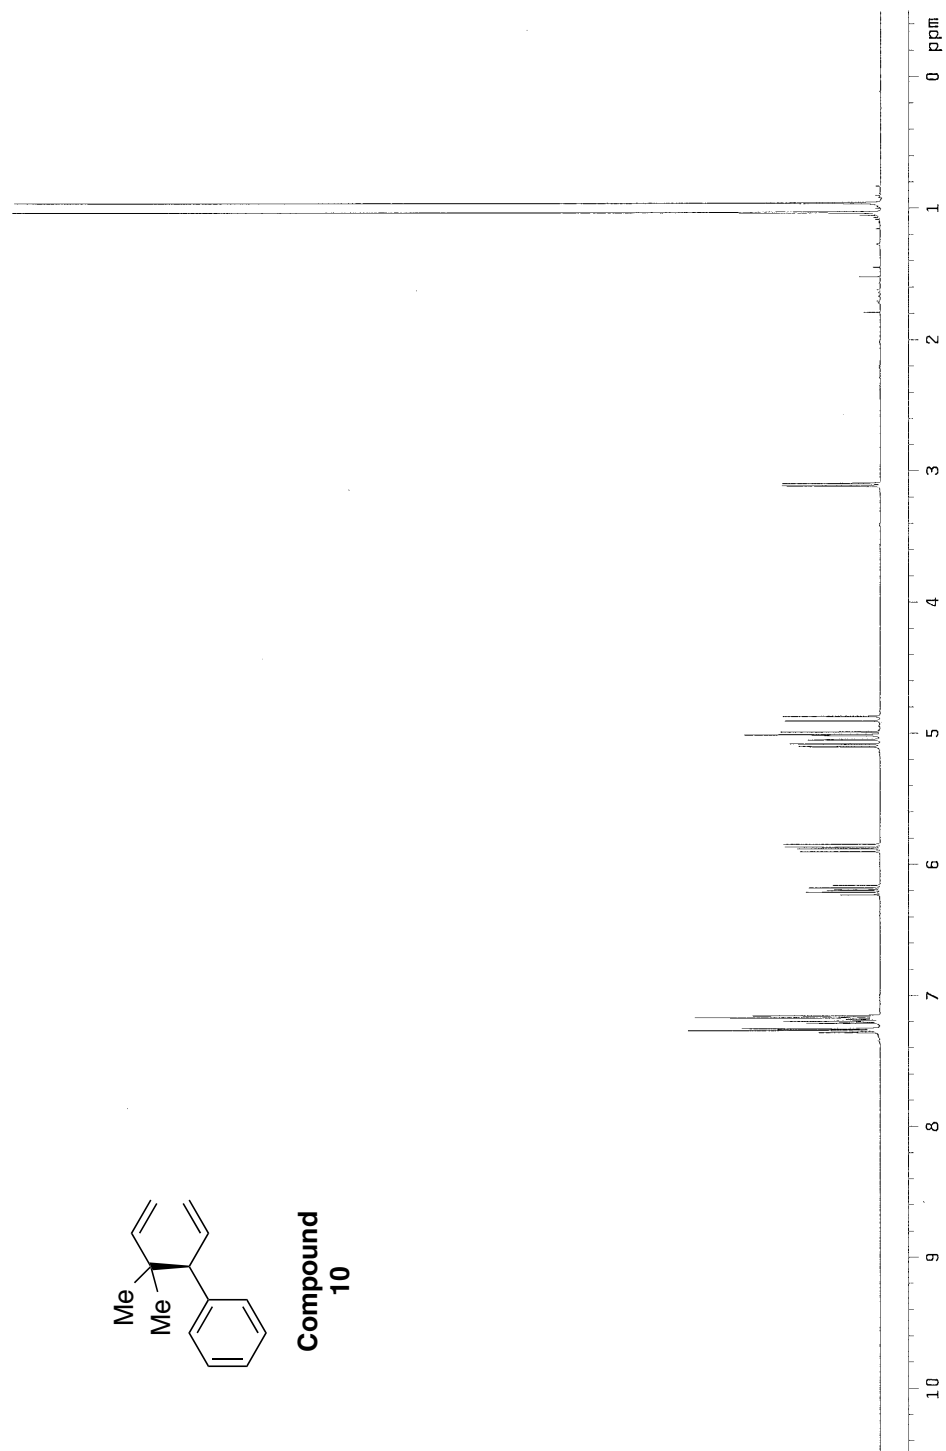

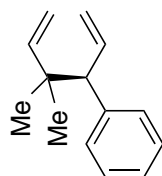

**Compound  
10**

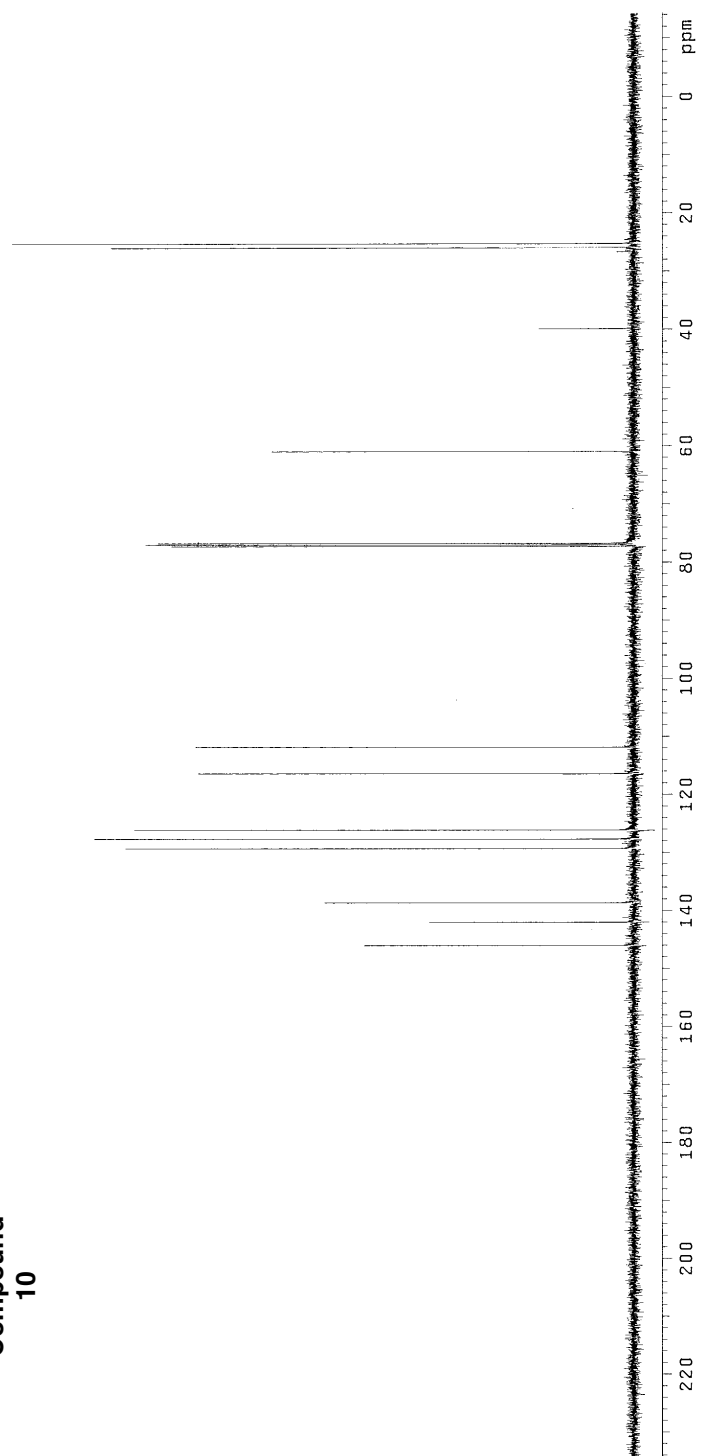

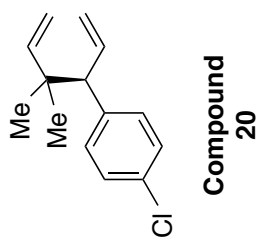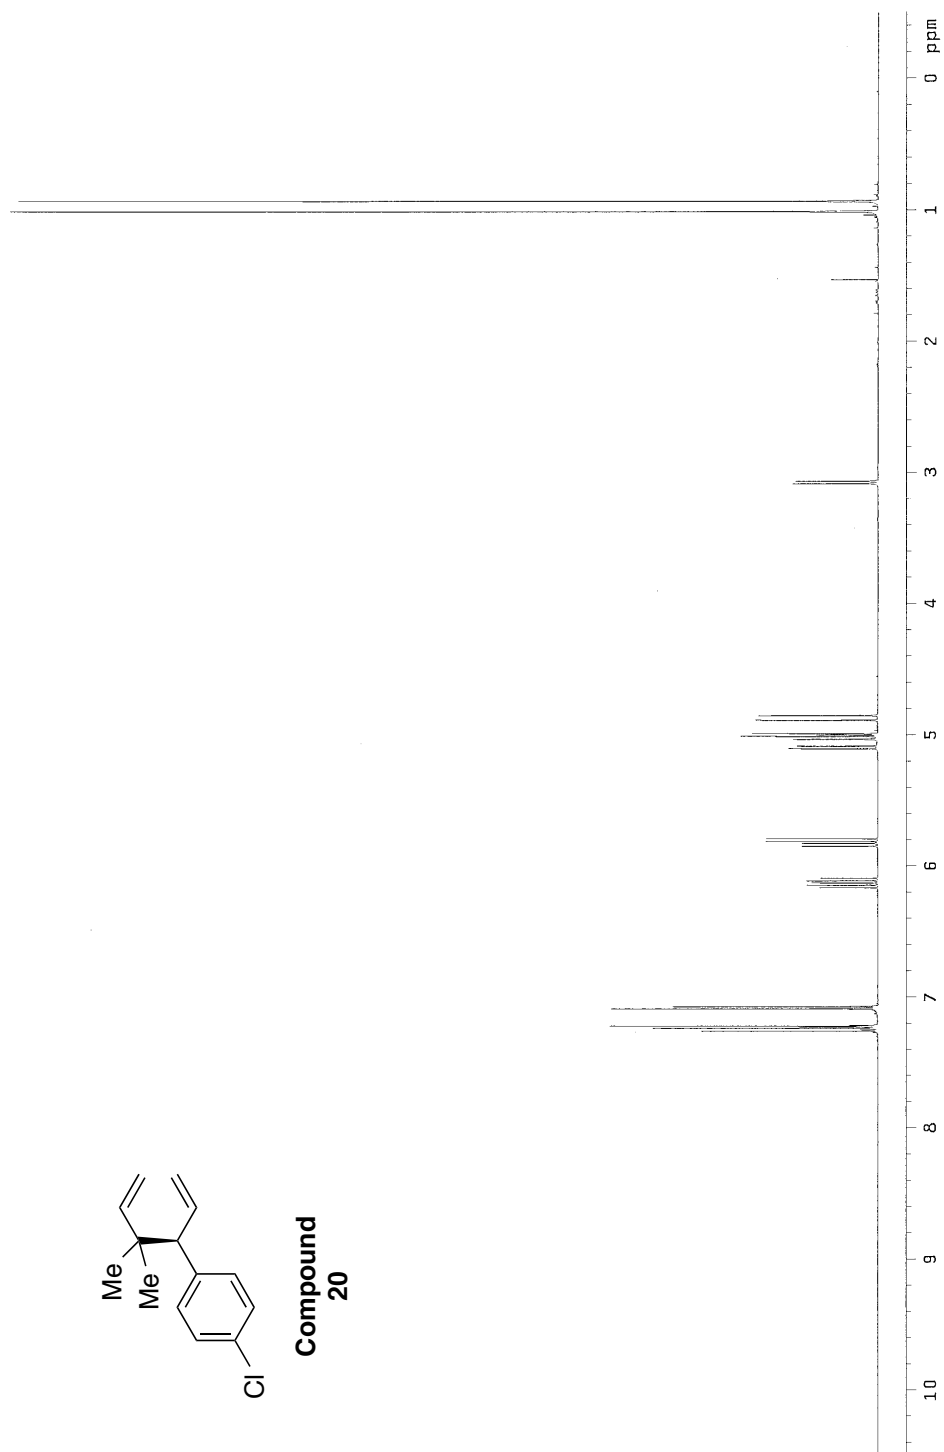



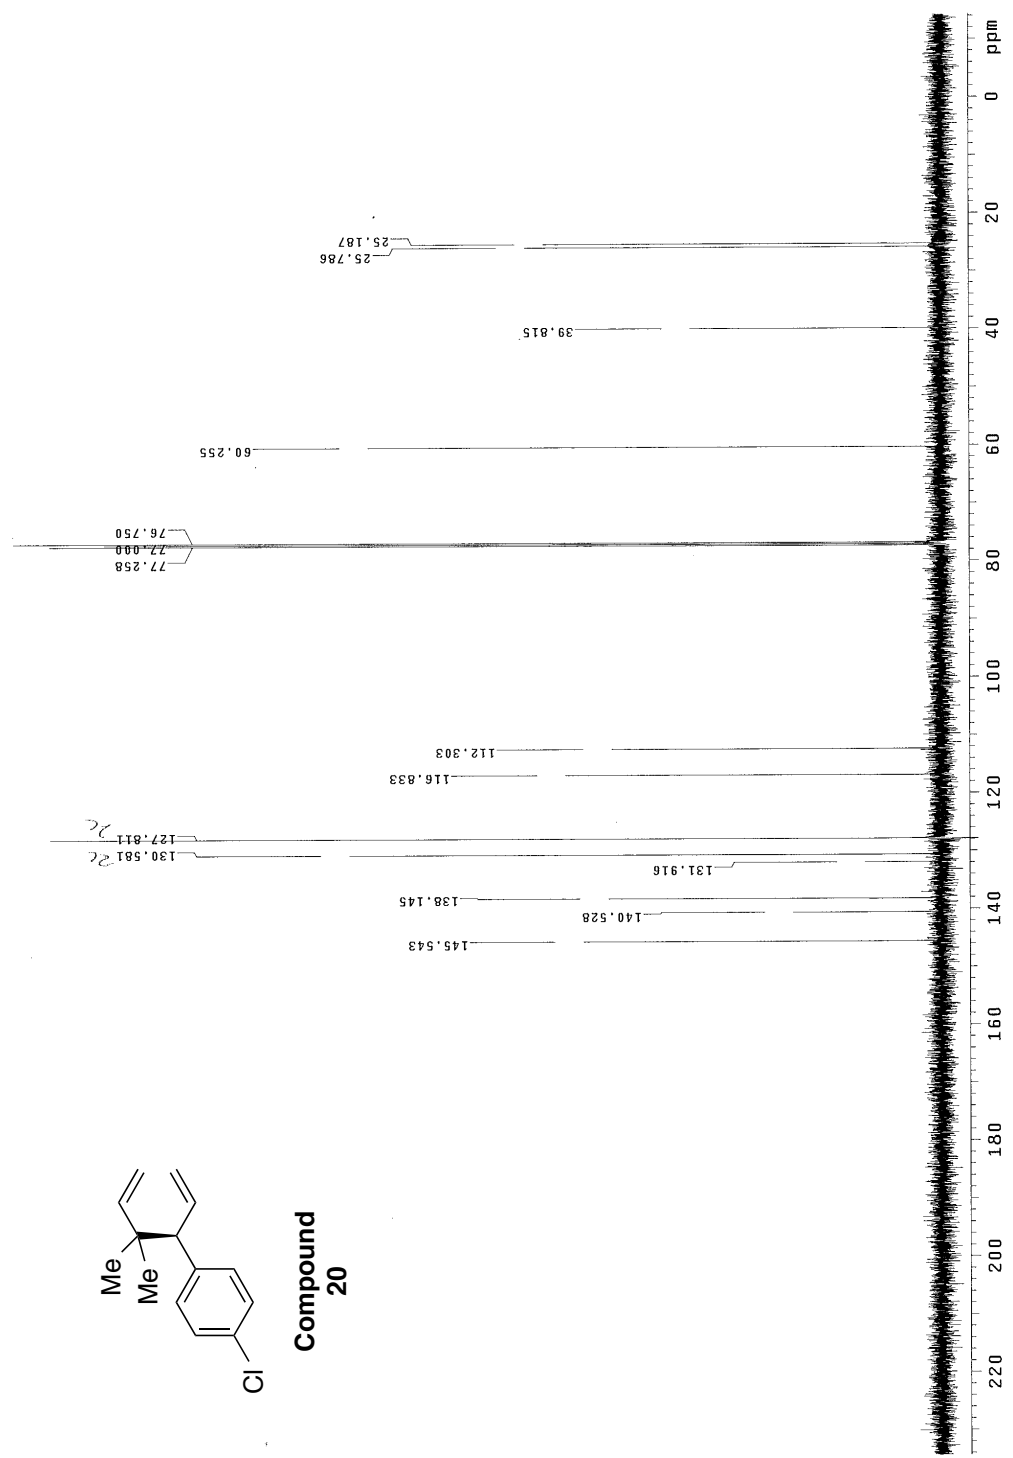

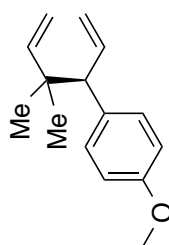

**Compound  
21**

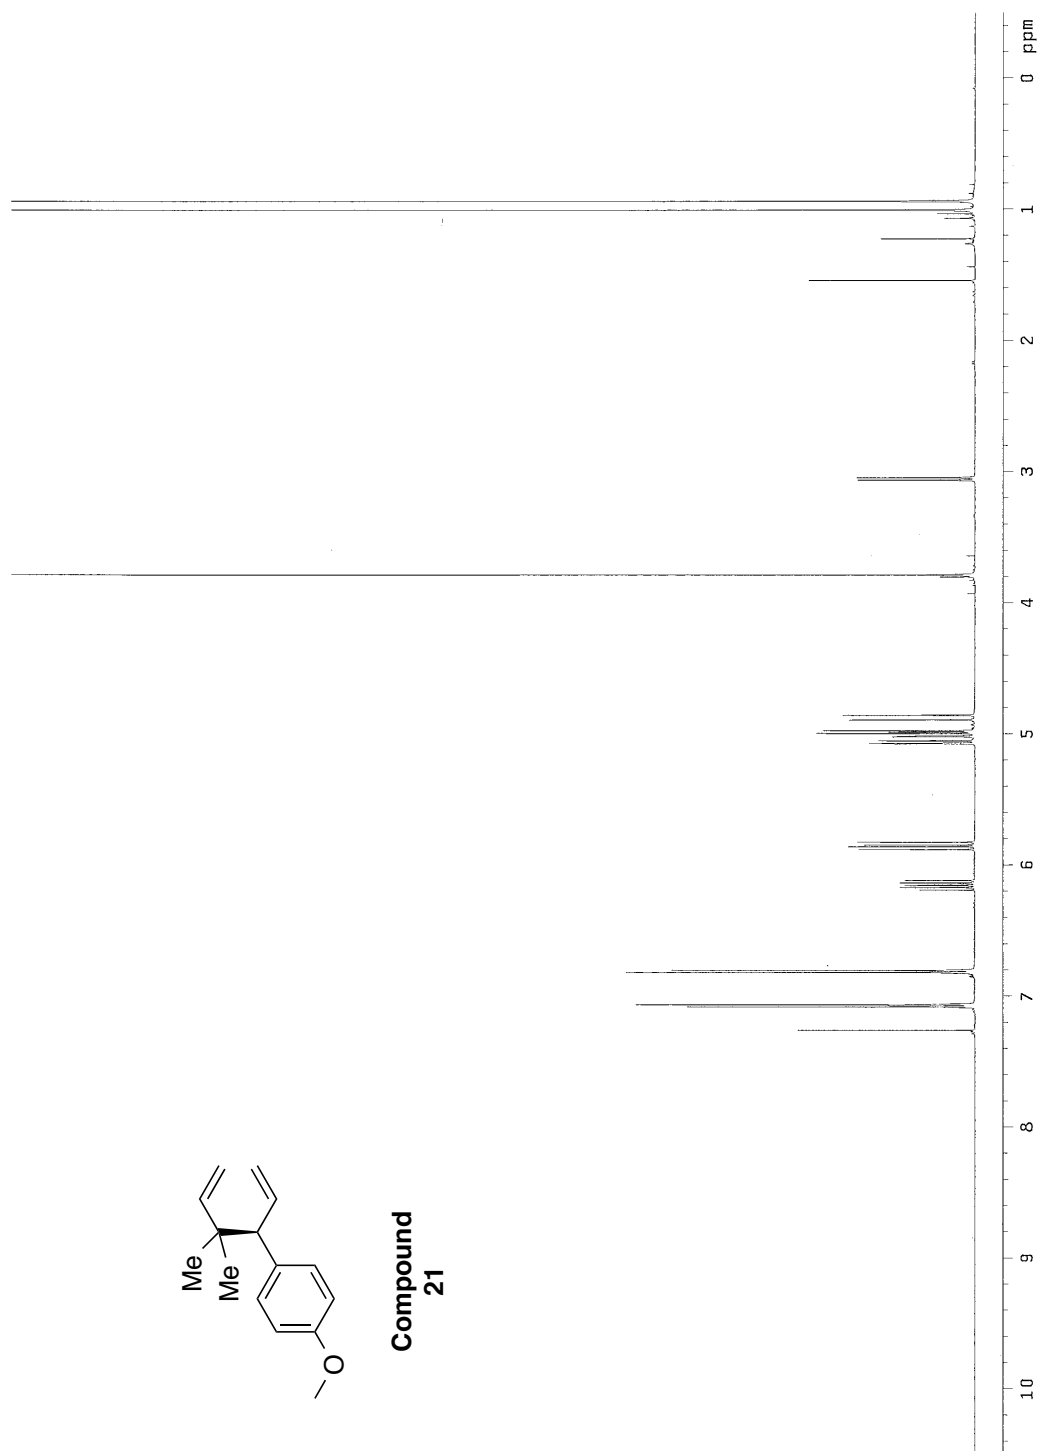



**Compound  
21**

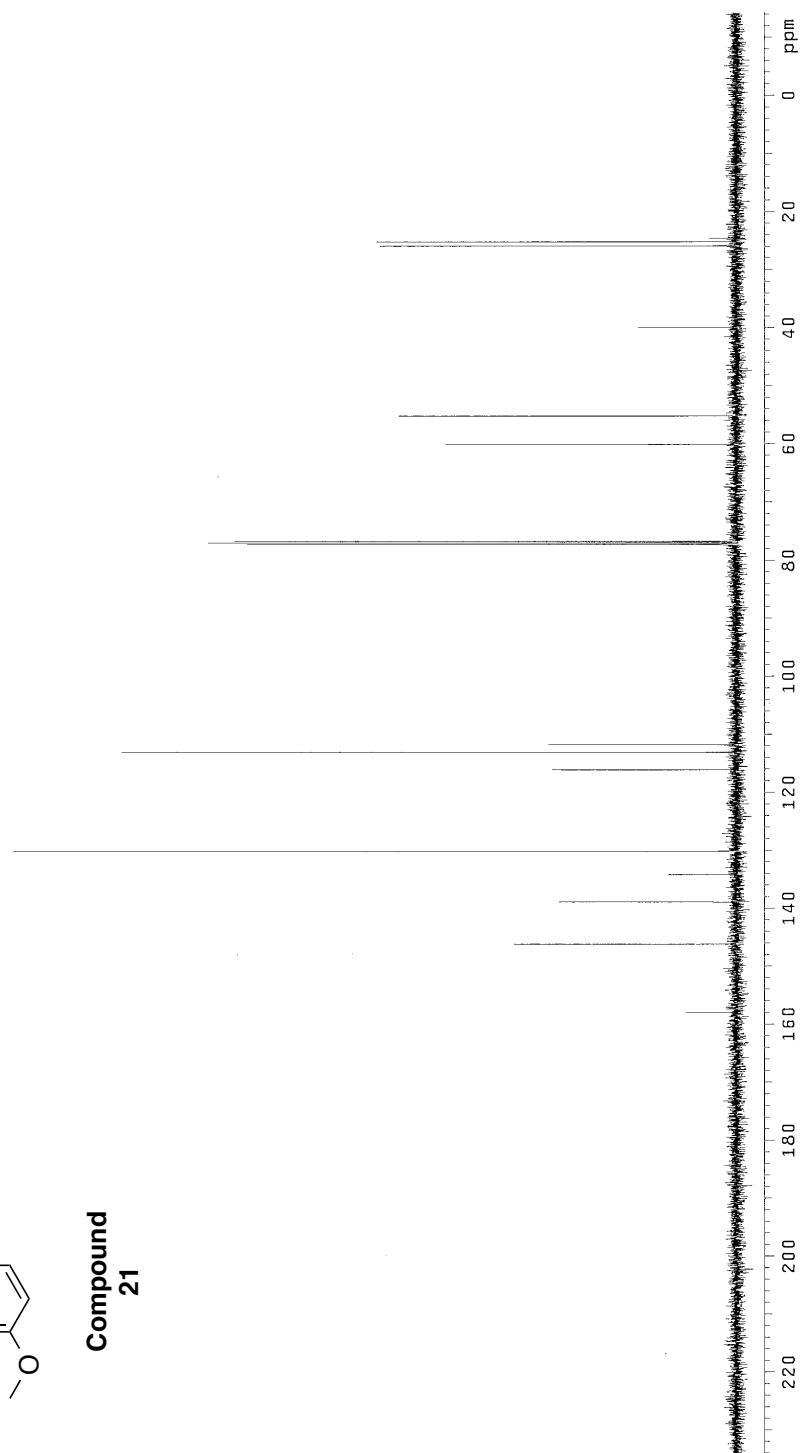

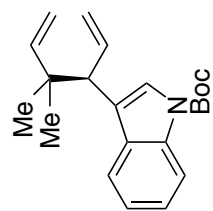

**Compound  
22**

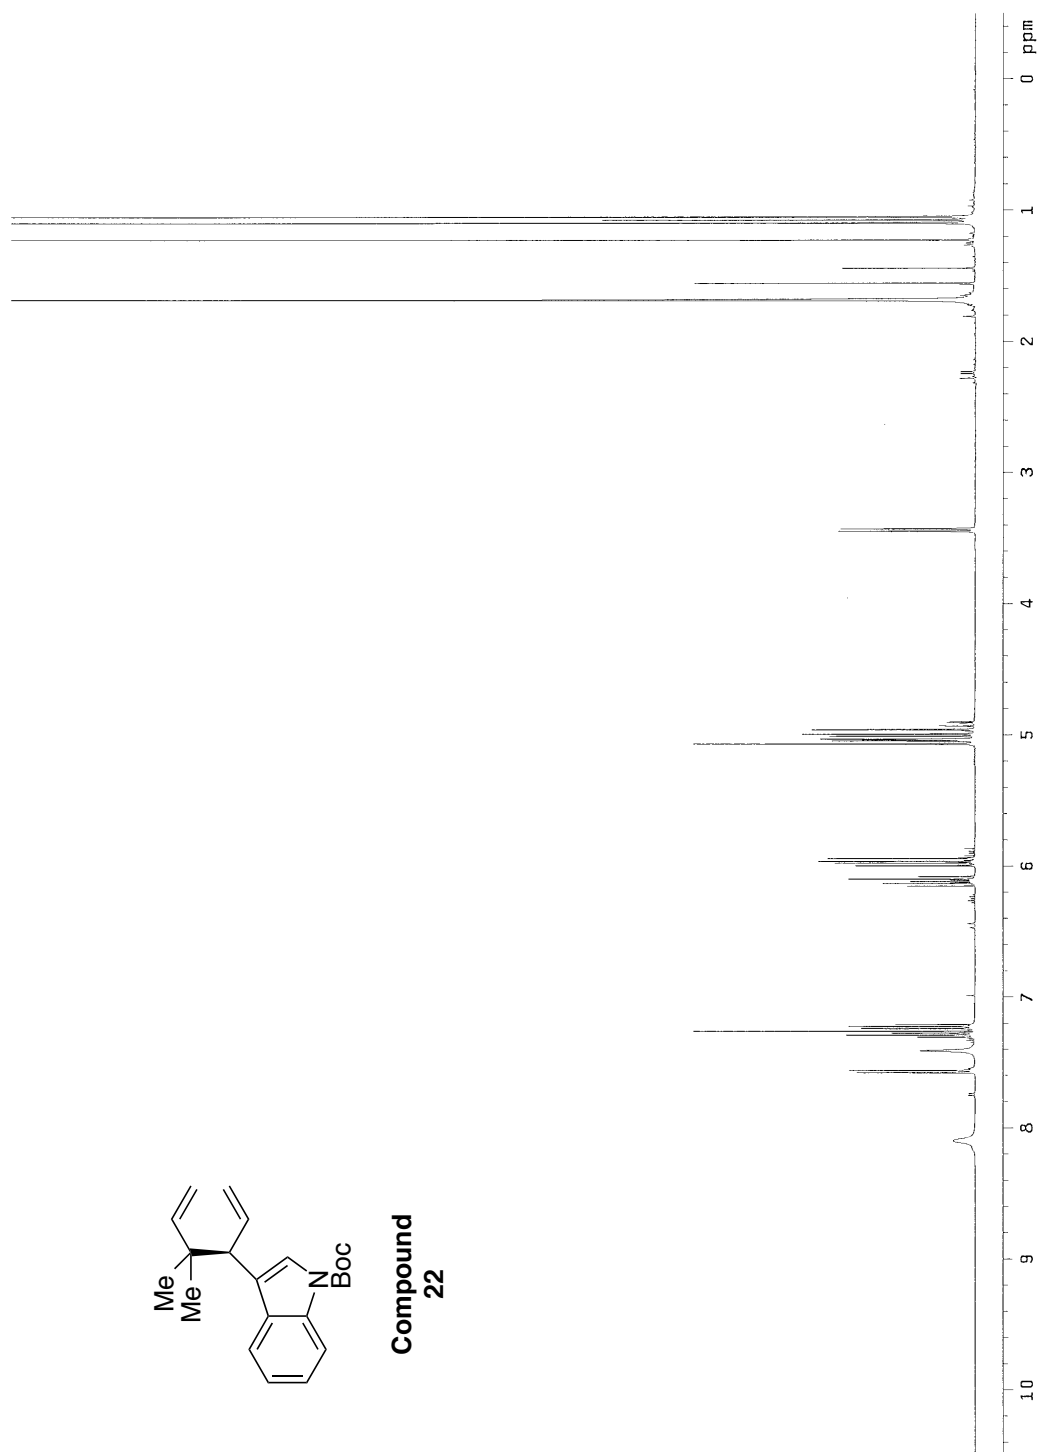

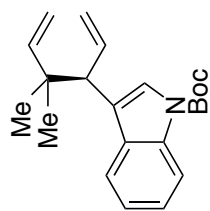

**Compound  
22**

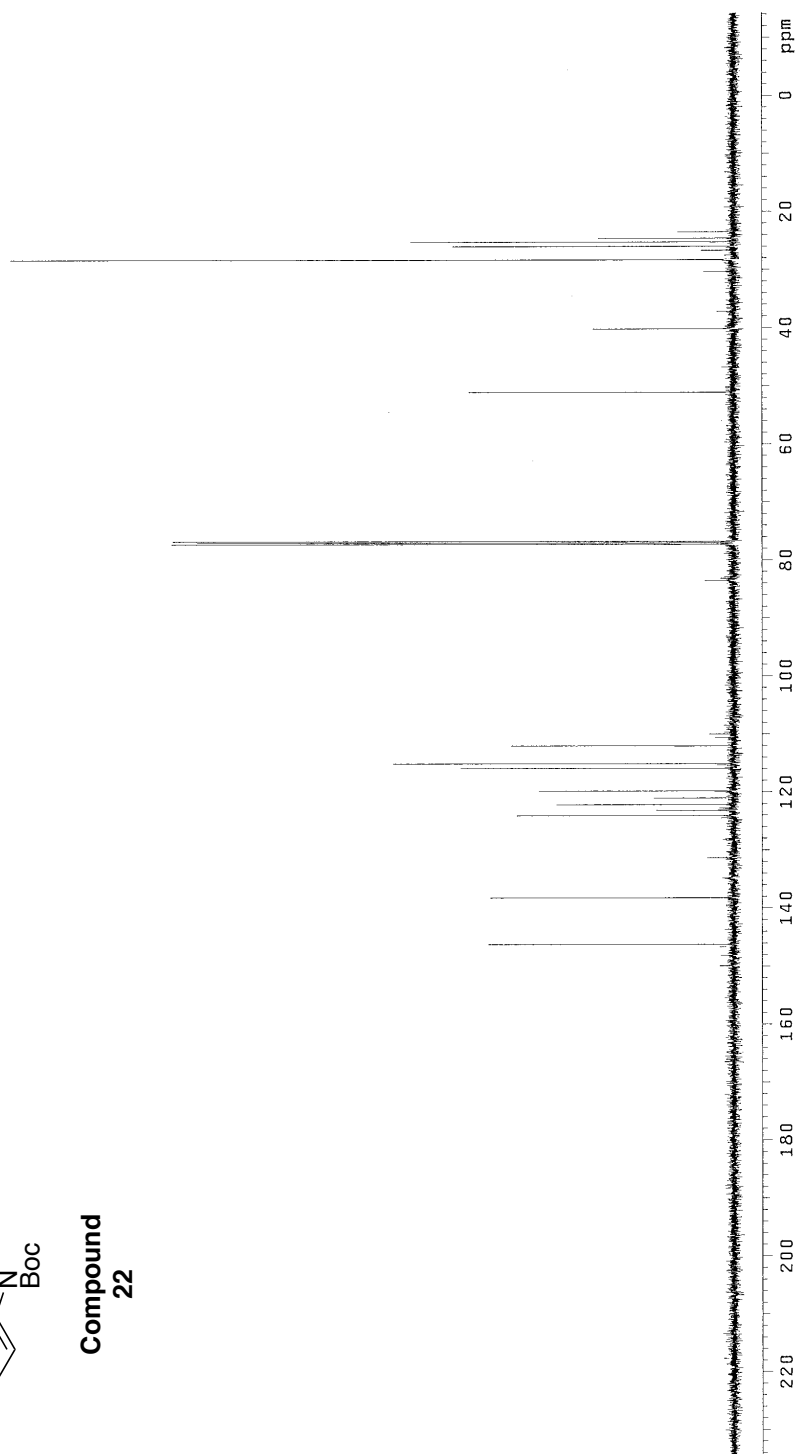

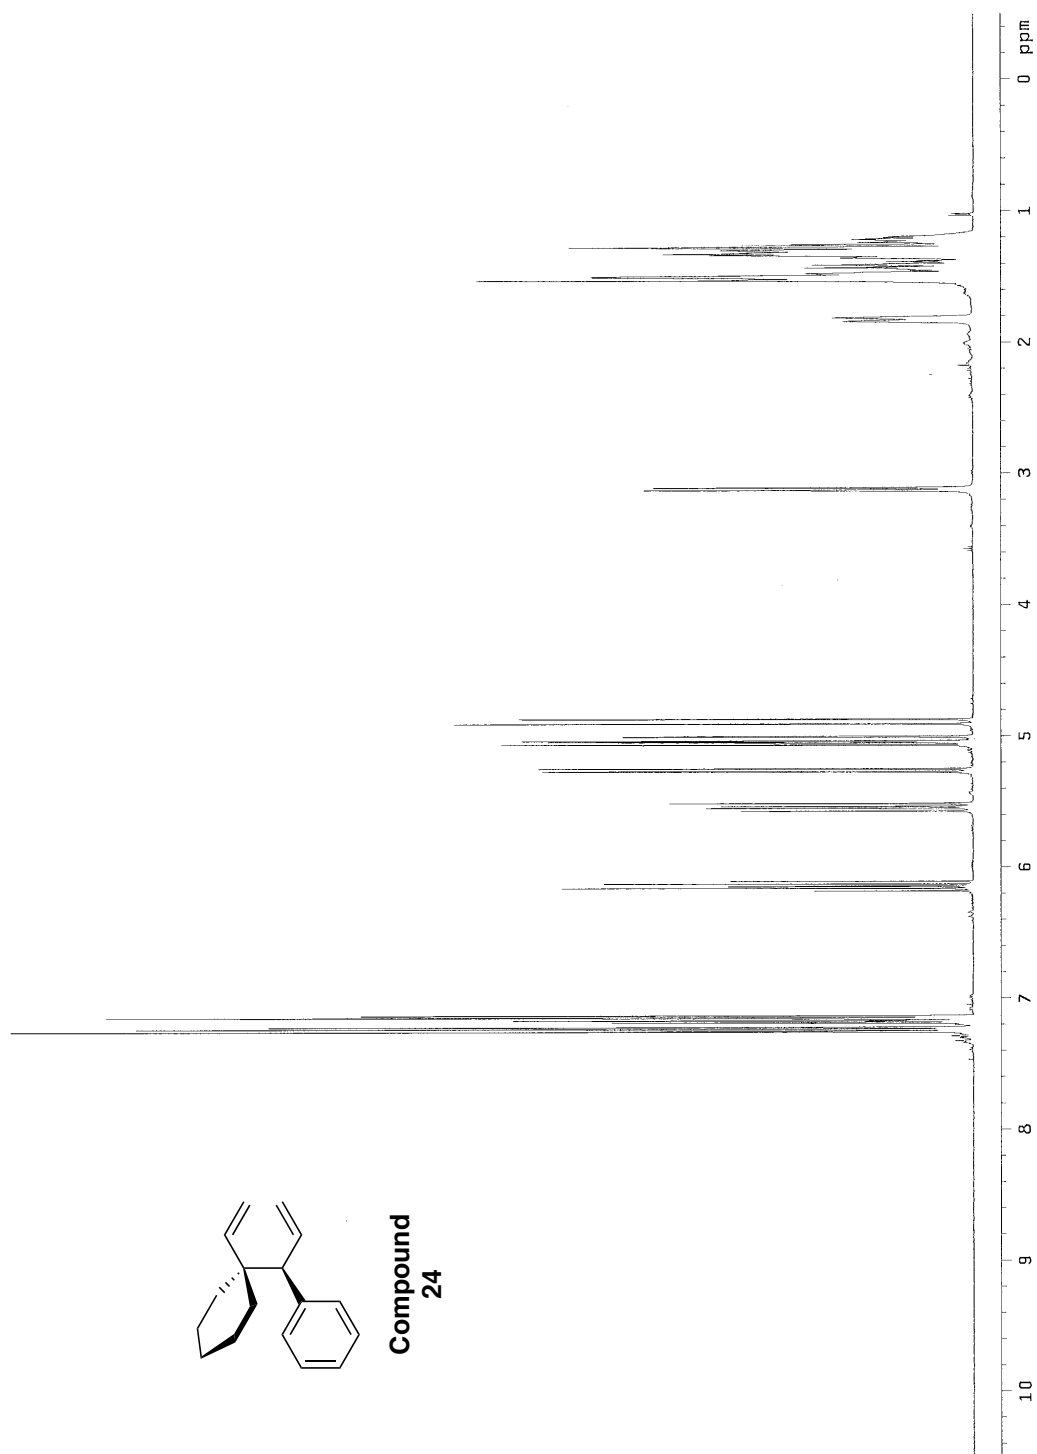

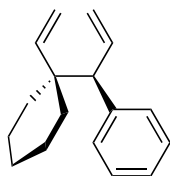

**Compound  
24**

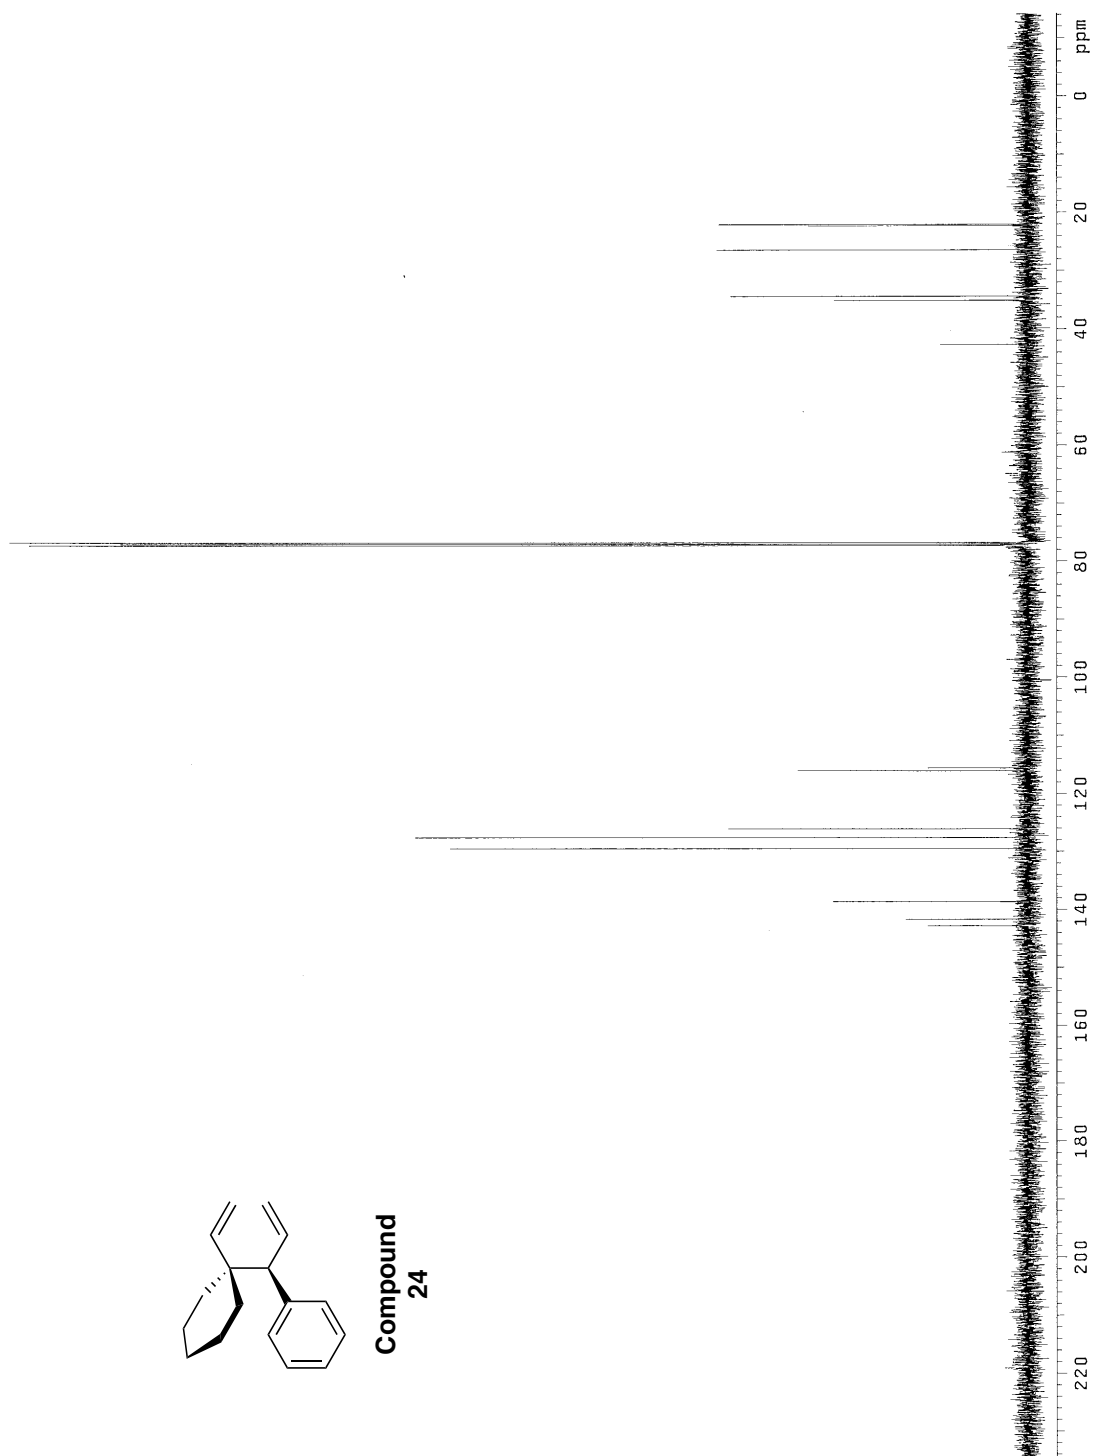

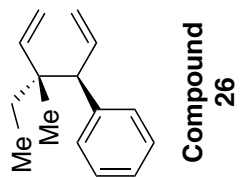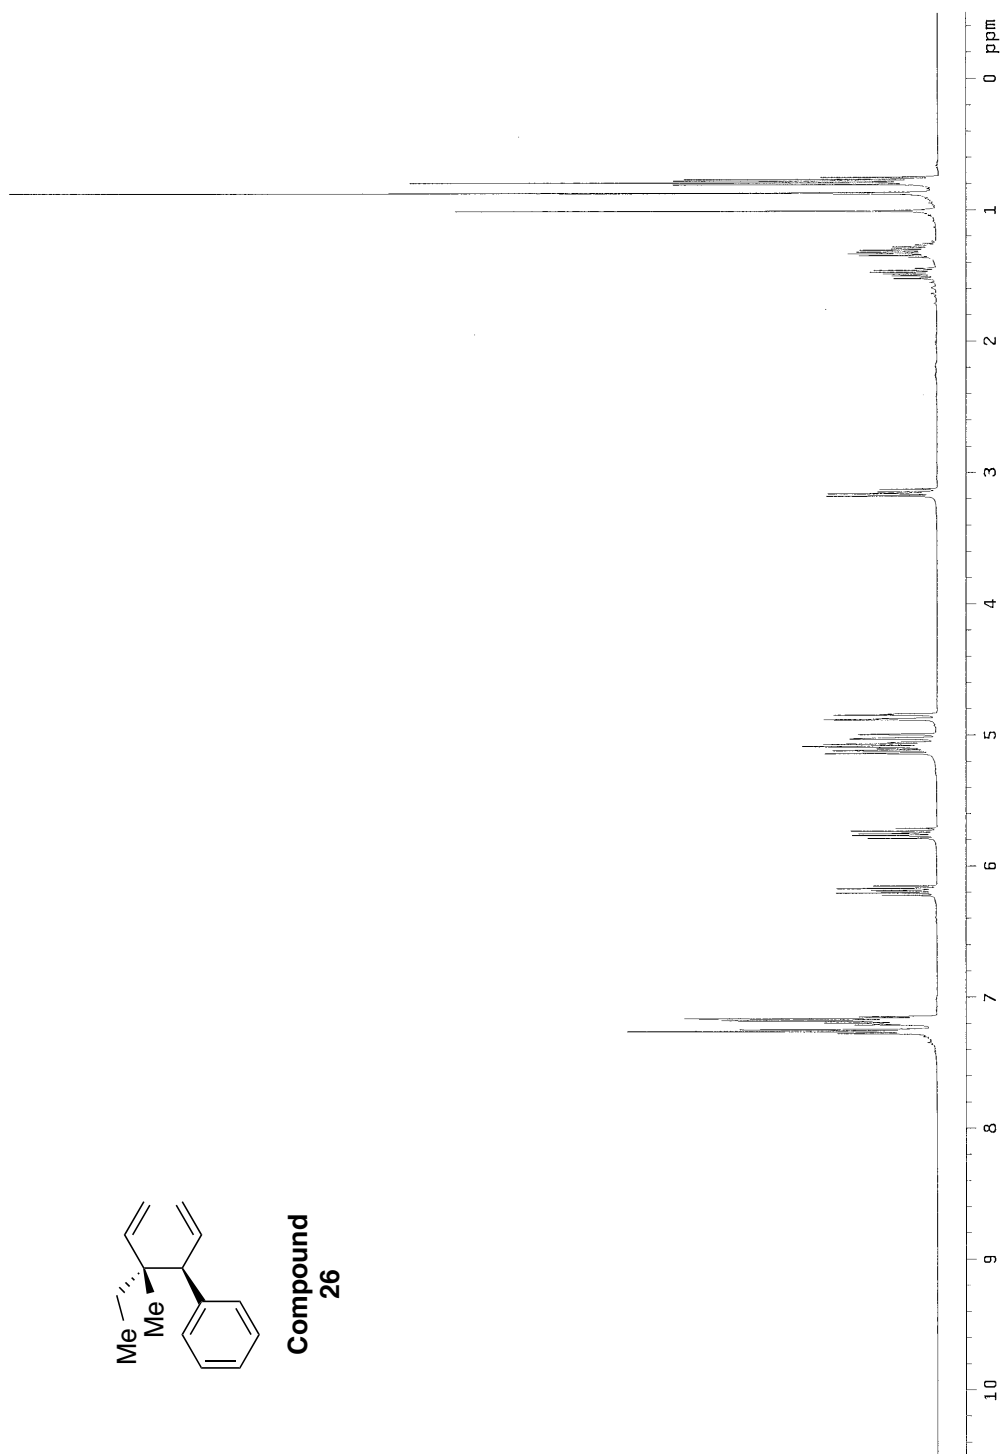



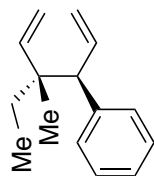

**Compound  
26**

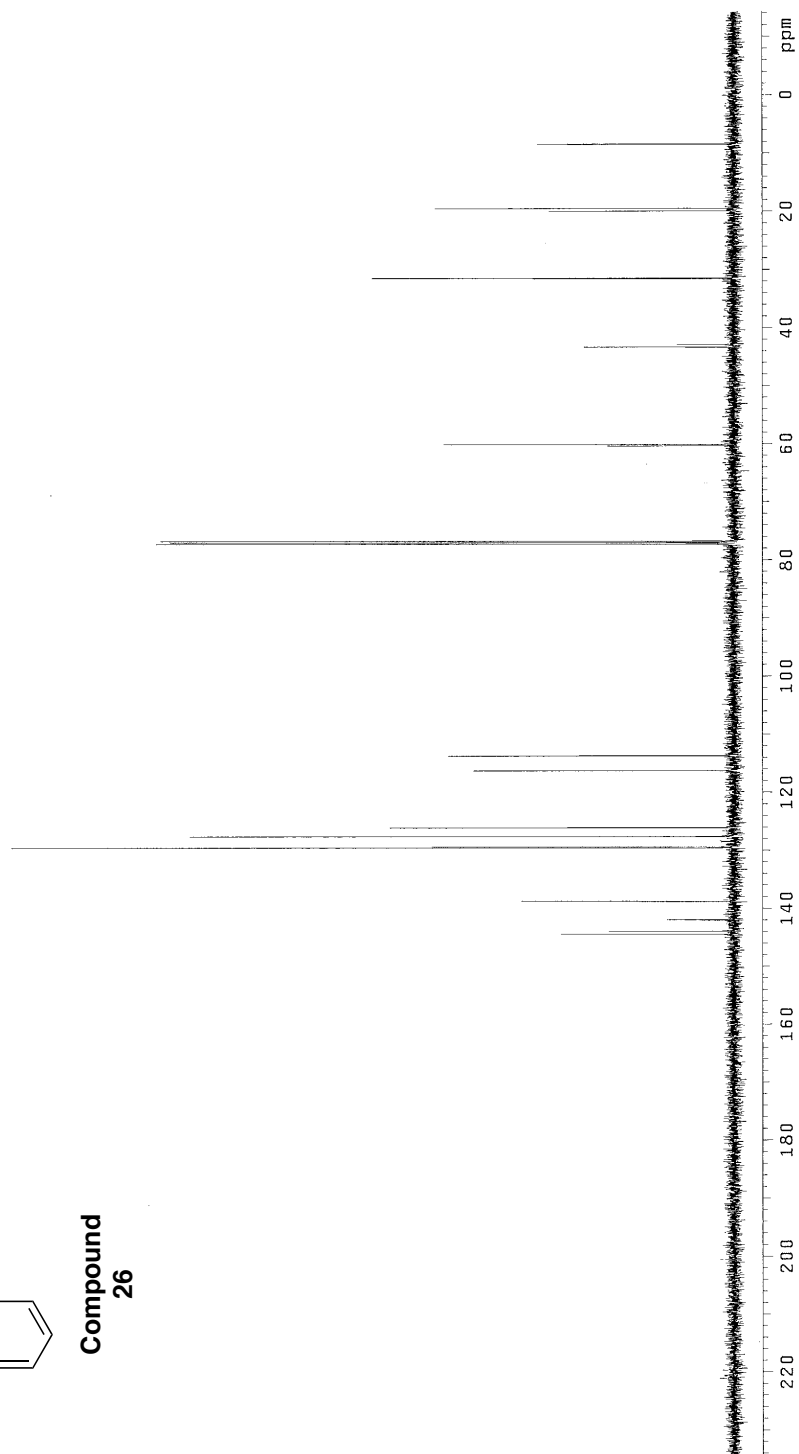

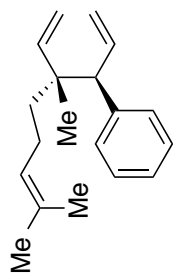

**Compound  
28**

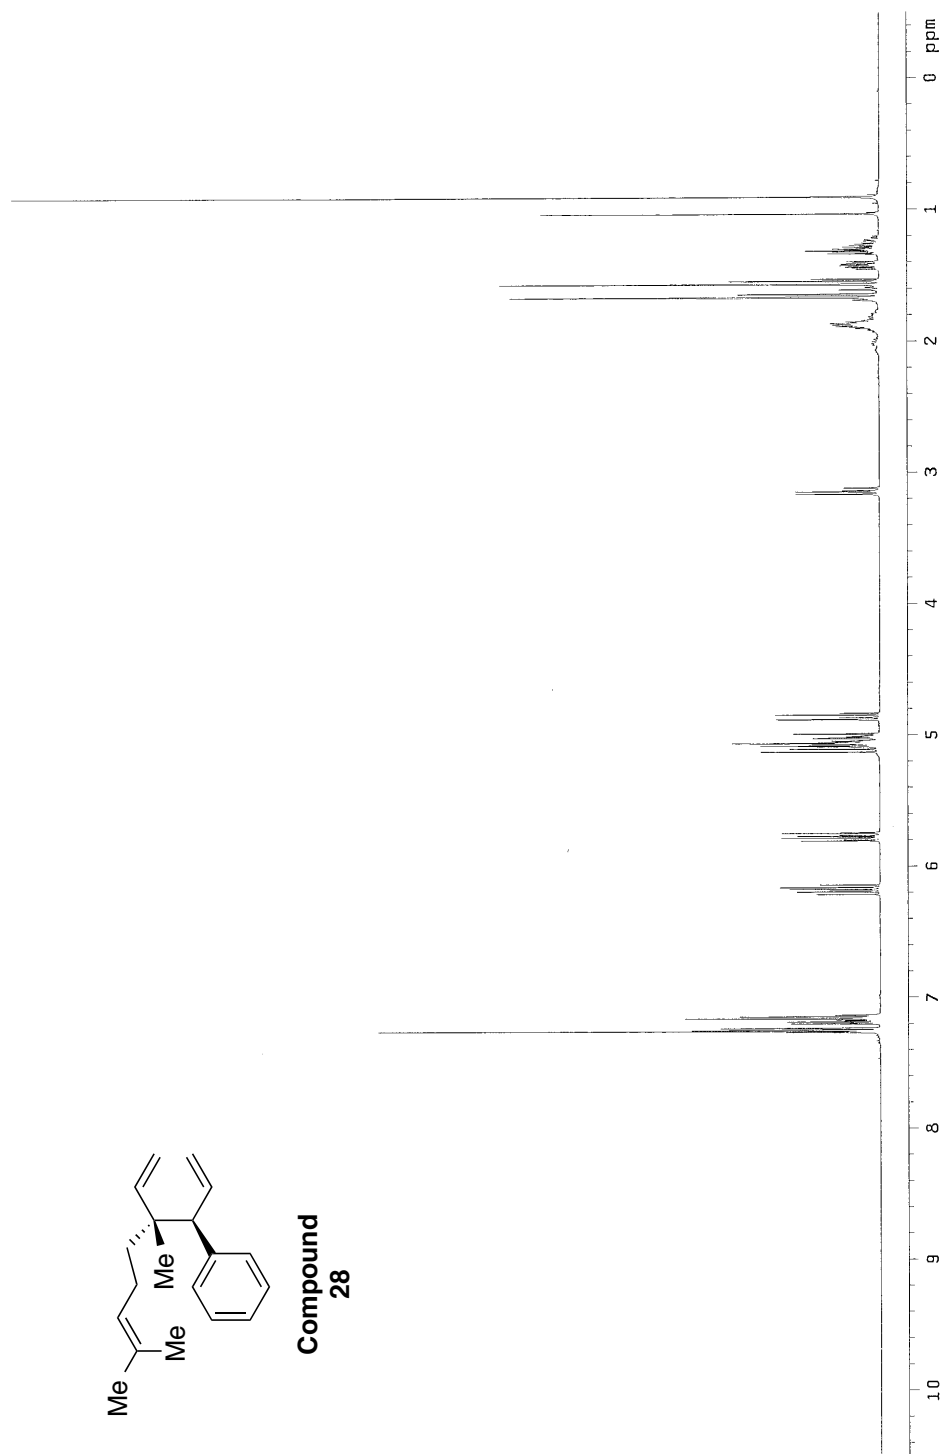

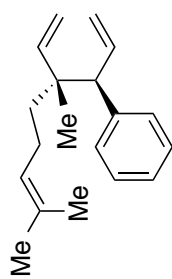

**Compound  
28**

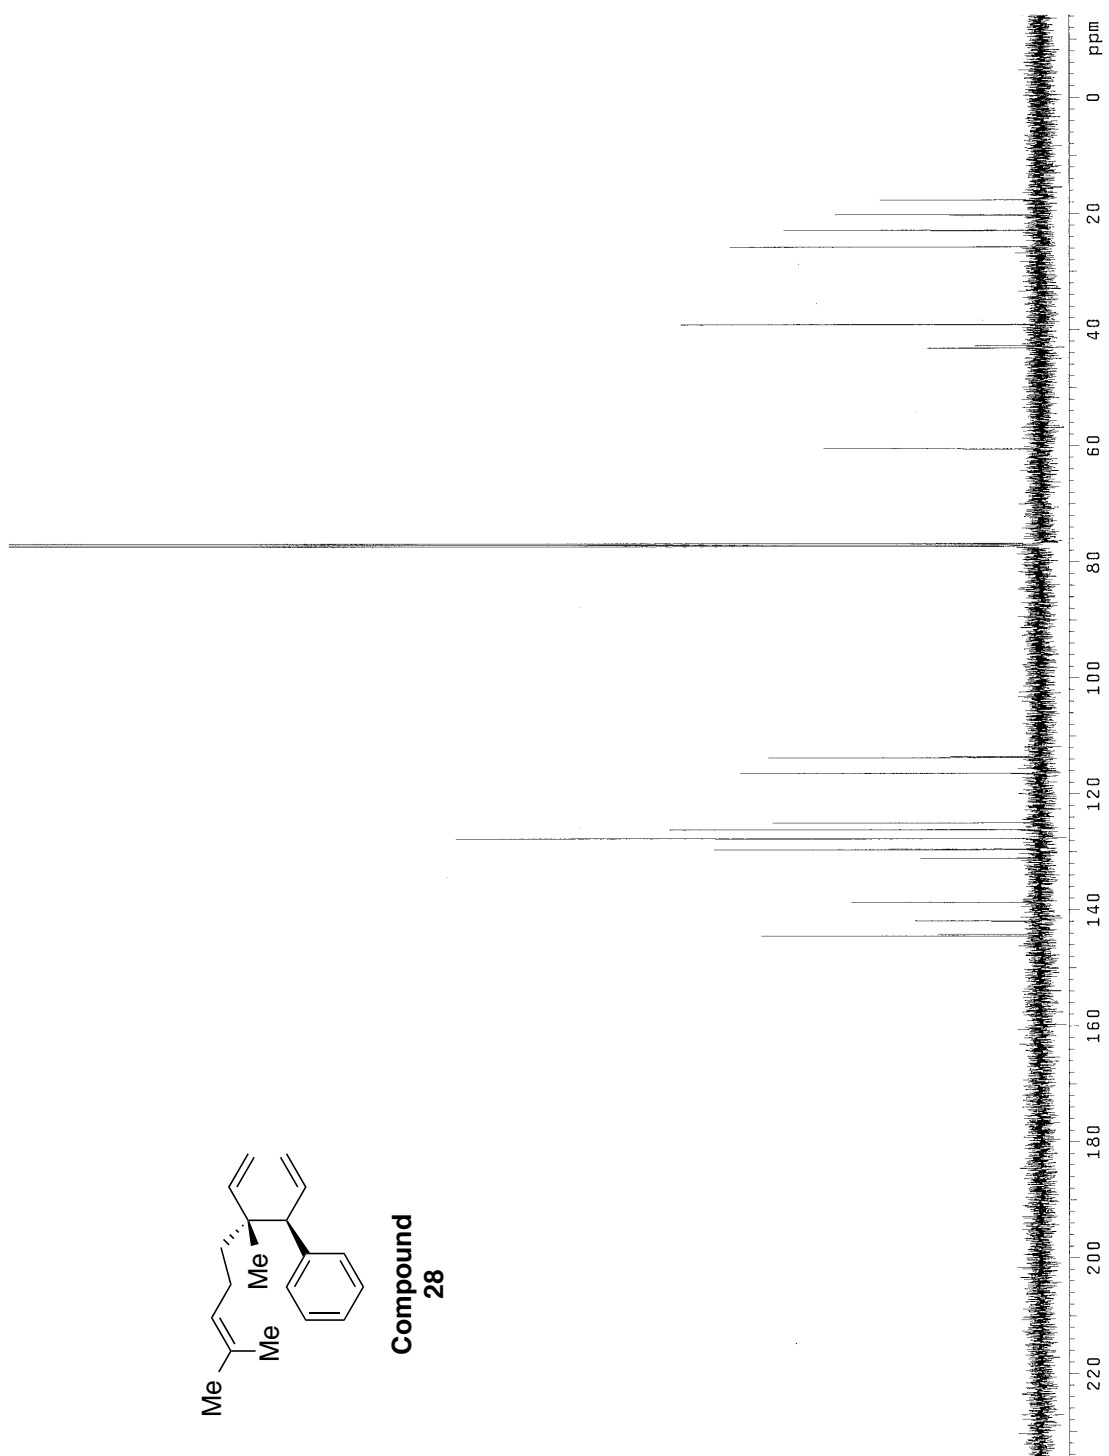

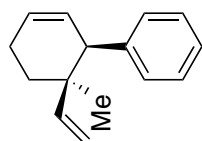

**Compound  
SI-8**

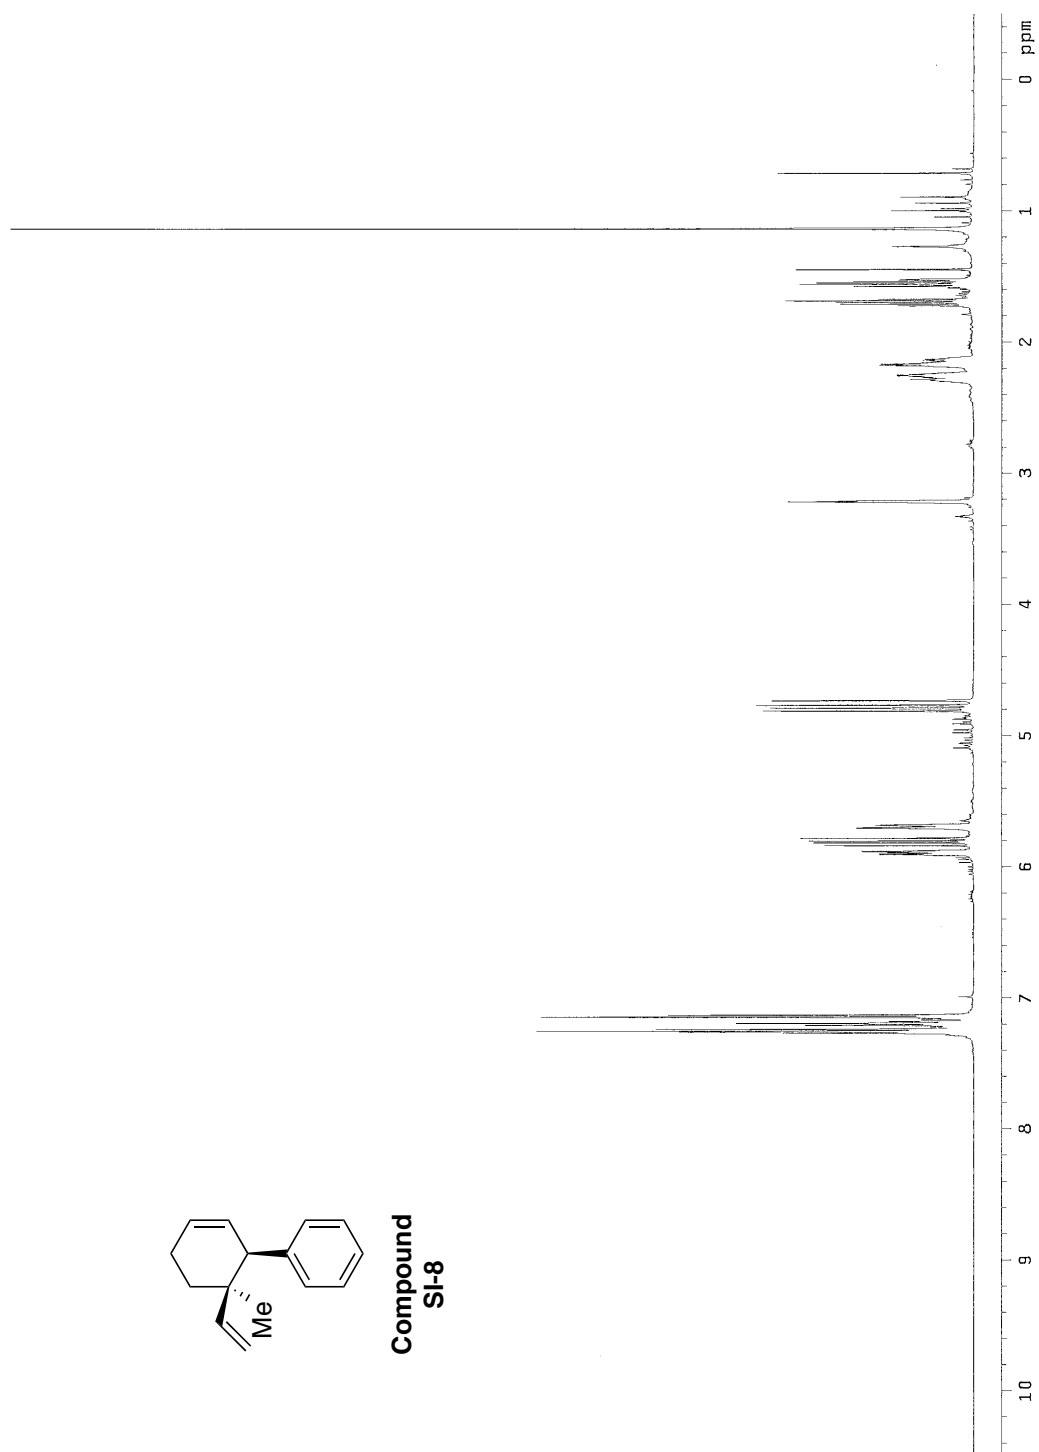



**Compound  
SI-8**

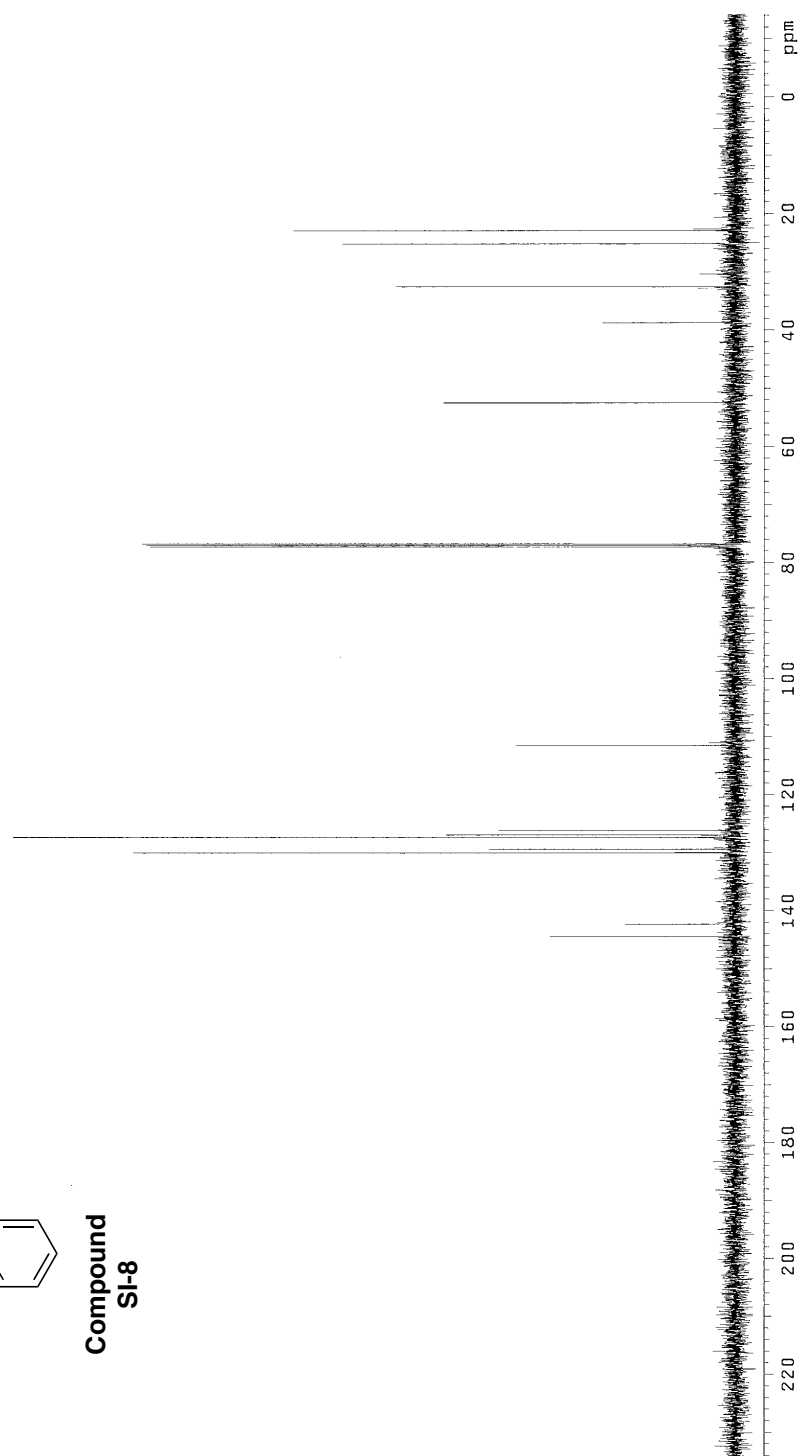

**Sample Name:**  
 Data Collected on:  
 nmr19-vmr5600  
 Archive directory:  
 Sample directory:  
 Fidfile: MikeA\_1.2mix\_NOESY  
**Pulse Sequence:** NOESY  
**Solvent:** cdcl3  
 Data collected on: Oct 17 2013  
 Temp. 25.0 C / 298.1 K  
 Operator: vmr1  
 Relax. delay 1.000 sec  
 Acq. time 0.150 sec  
 Width 5081.3 Hz  
 2D Width 5081.3 Hz  
 16 repetitions  
 2 x 512 increments  
 Data Processing 99.865470 MHz  
 Data Processing  
 Gauss apodization 0.069 sec  
**F1 DATA PROCESSING**  
 Gauss apodization 0.036 sec  
 FT size 4096 x 4096  
 Total time 10 hr, 57 min

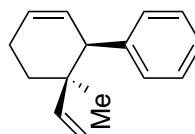

**Compound  
SI-8**

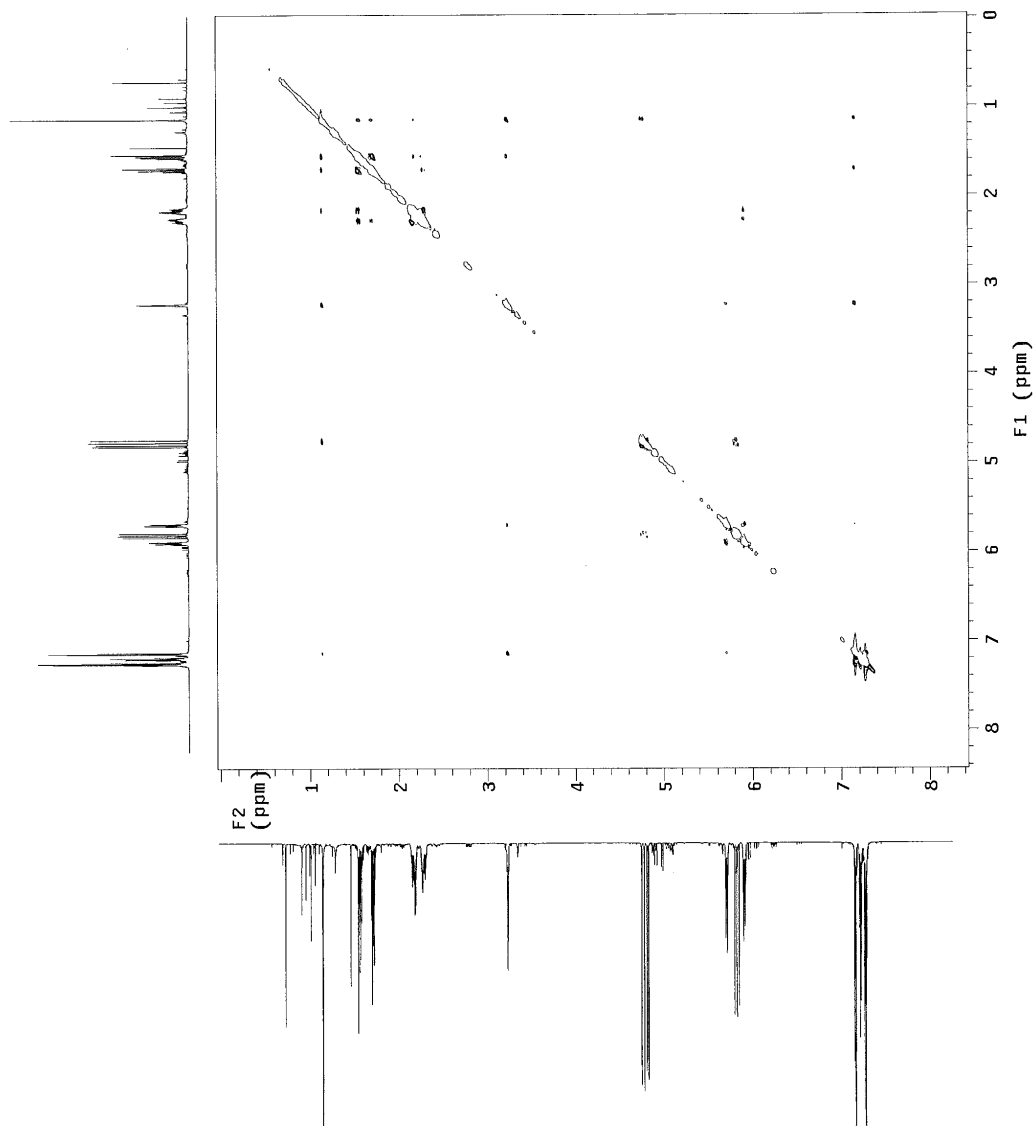

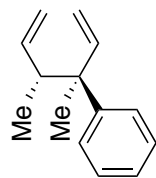

**Compound  
30**

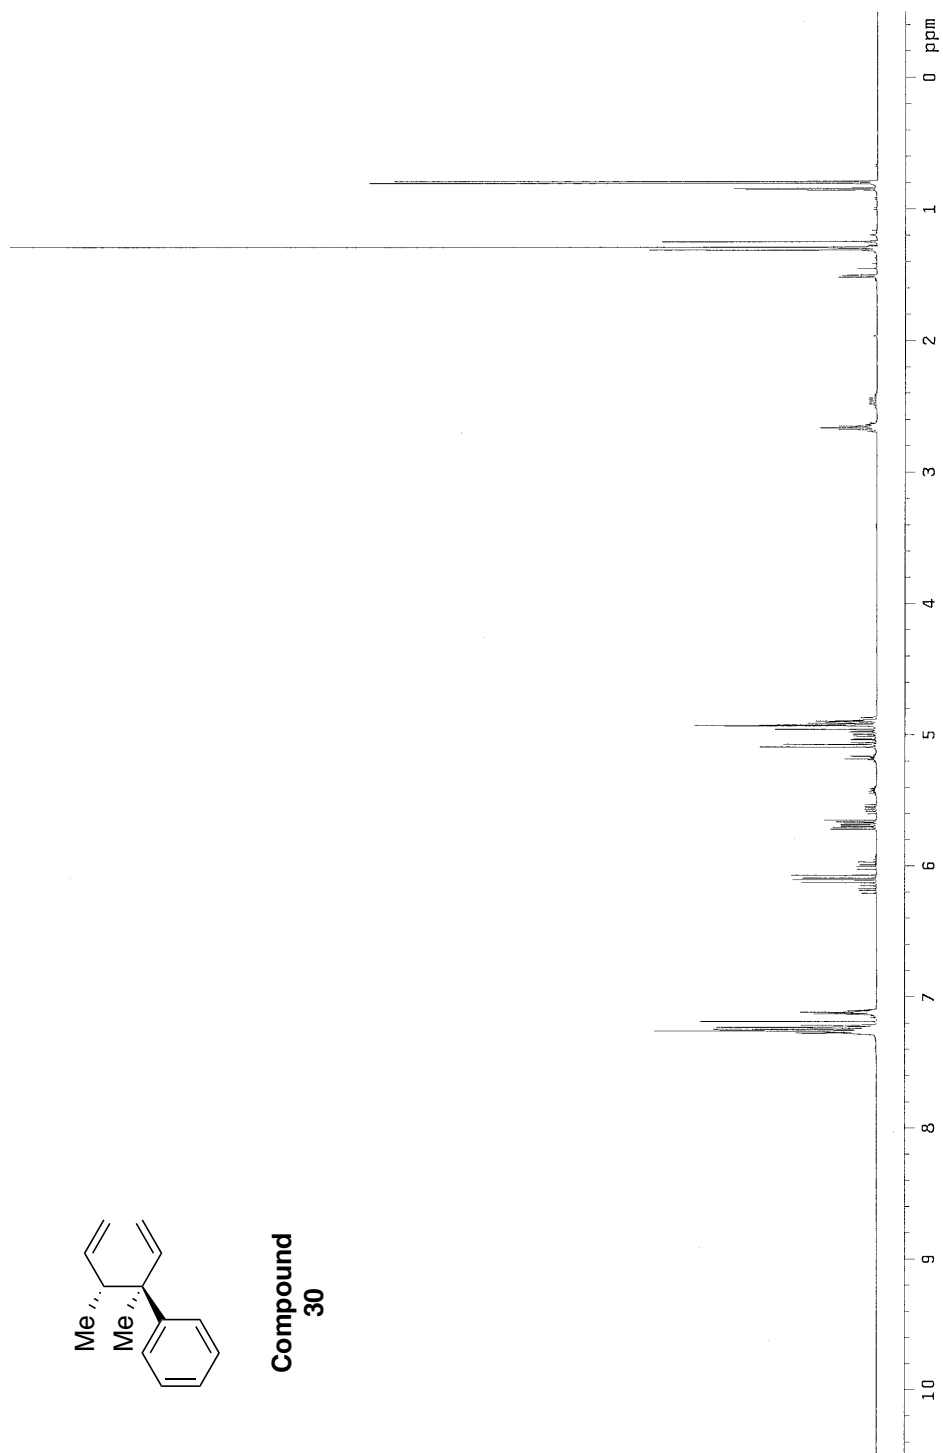



**Compound  
30**

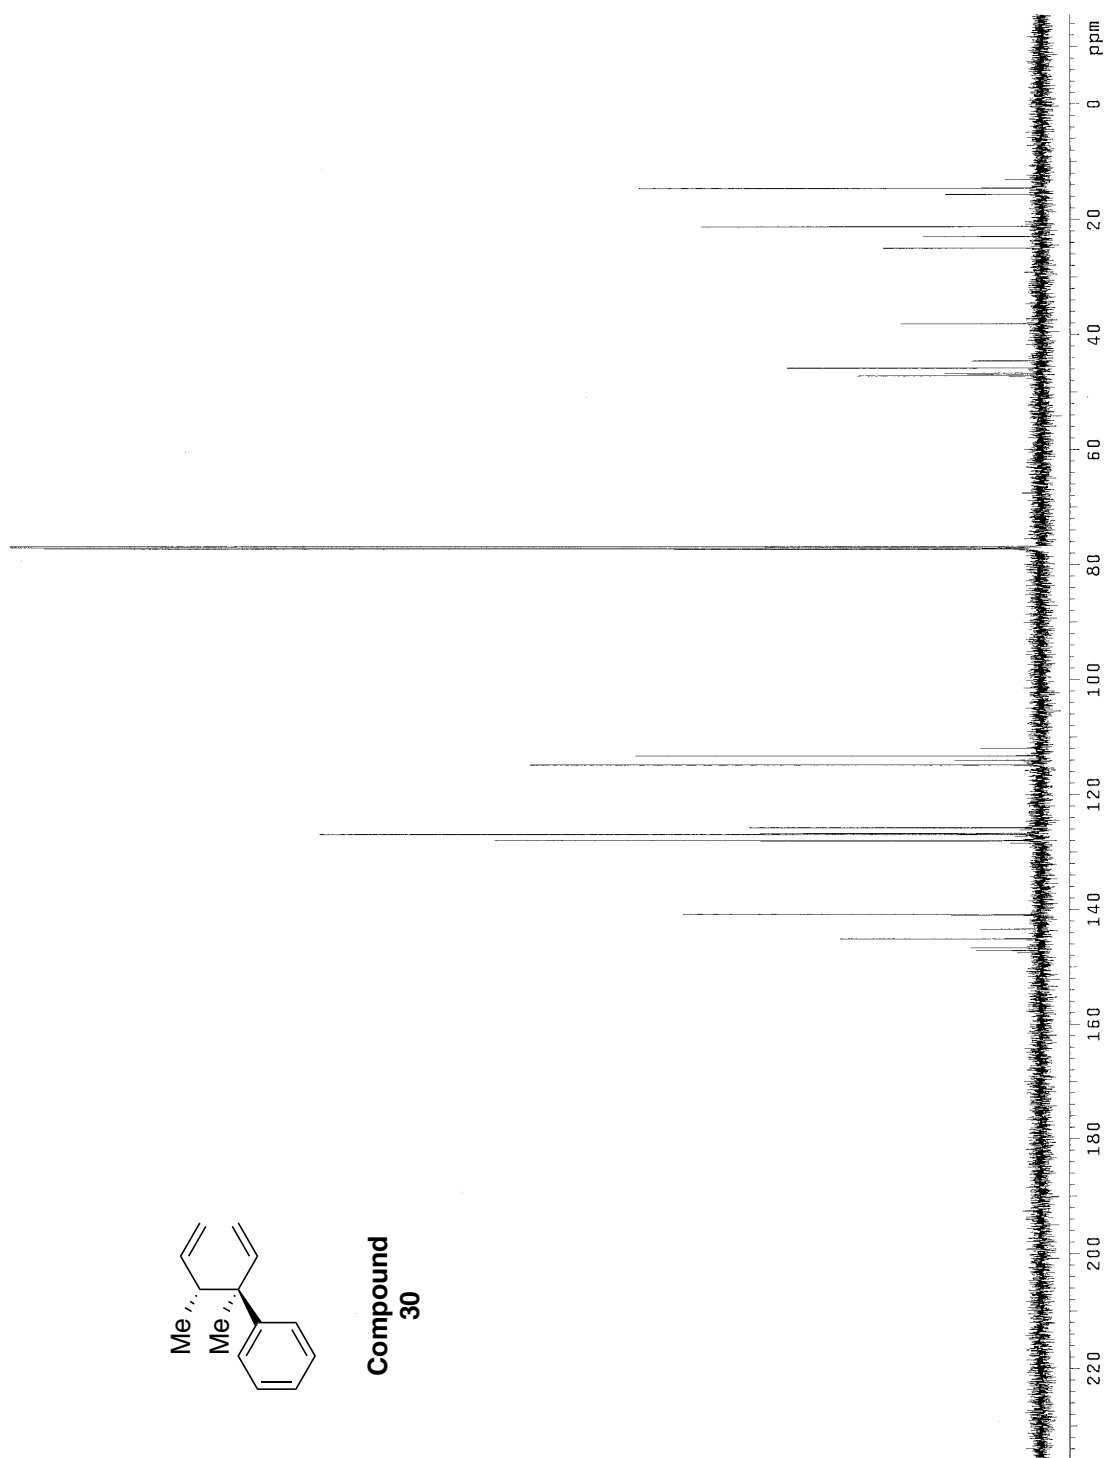



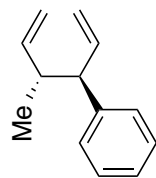

**Compound  
31**

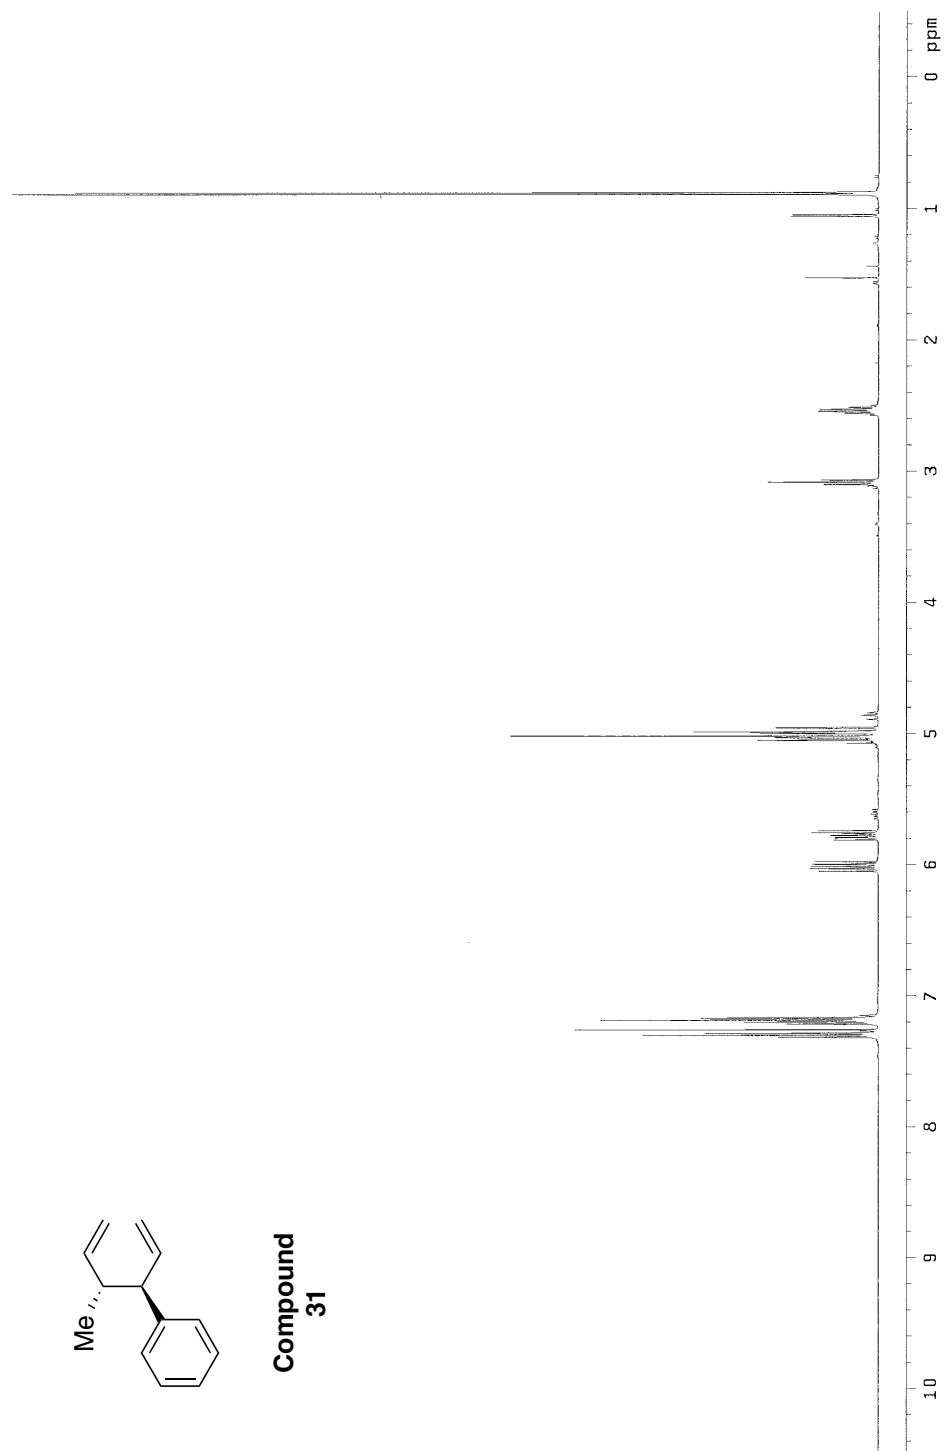

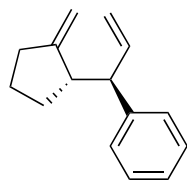

**Compound  
37**

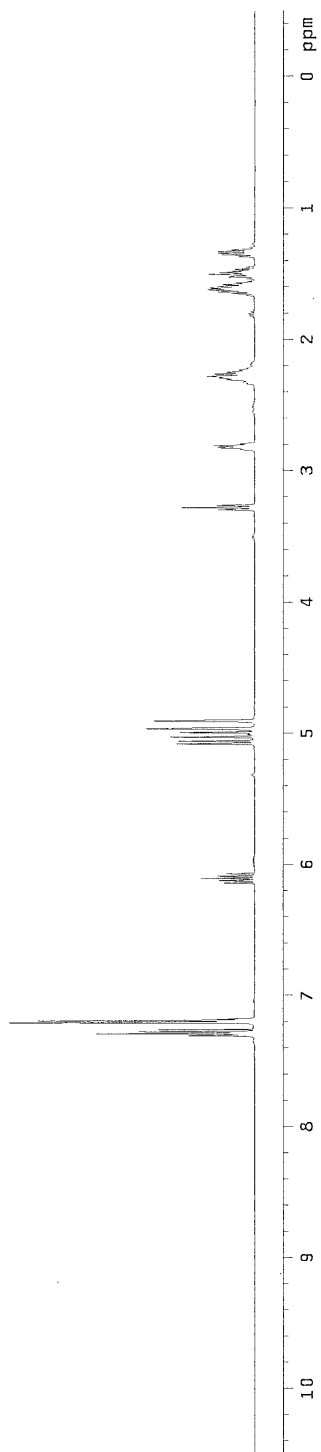

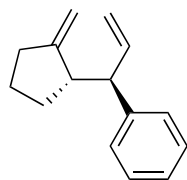

**Compound  
37**

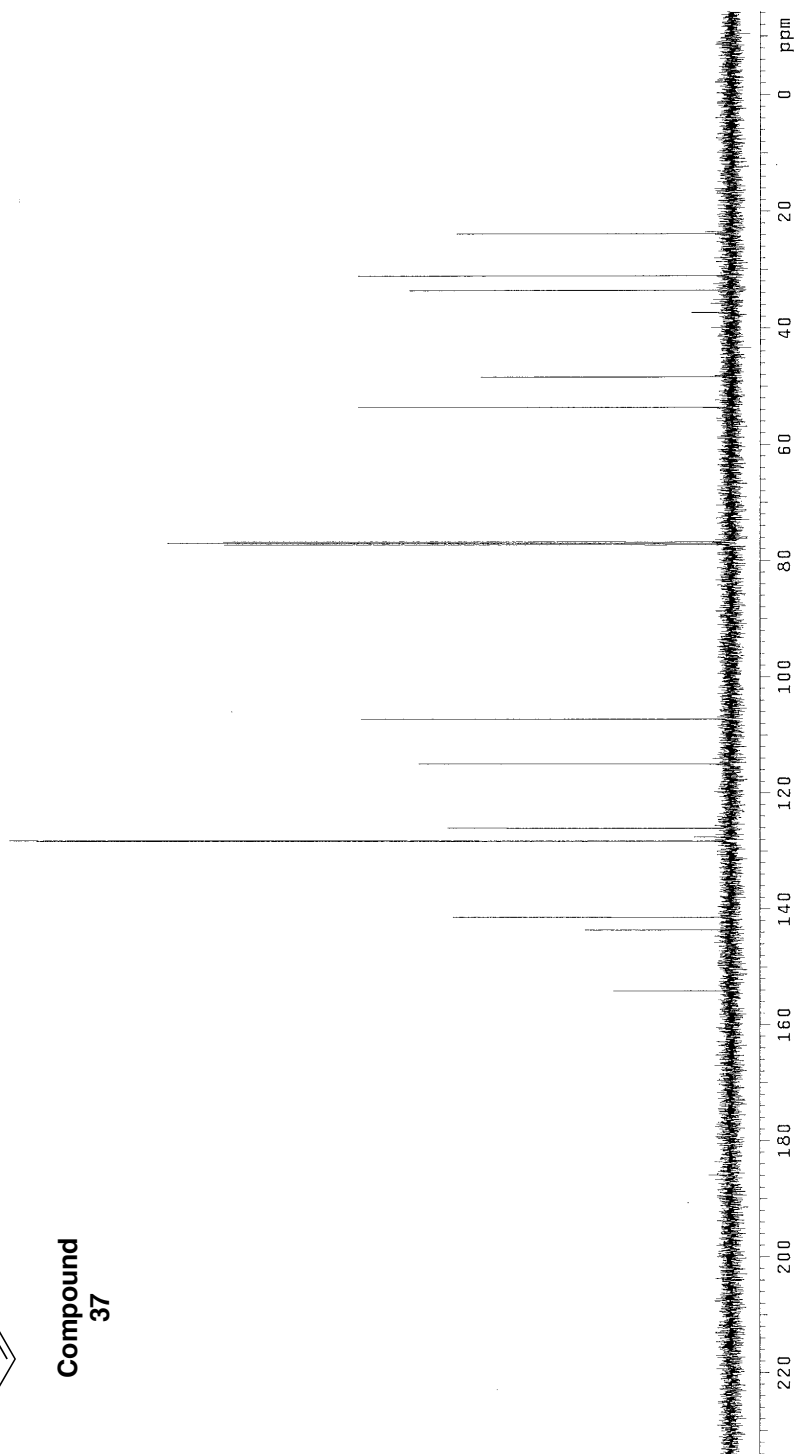

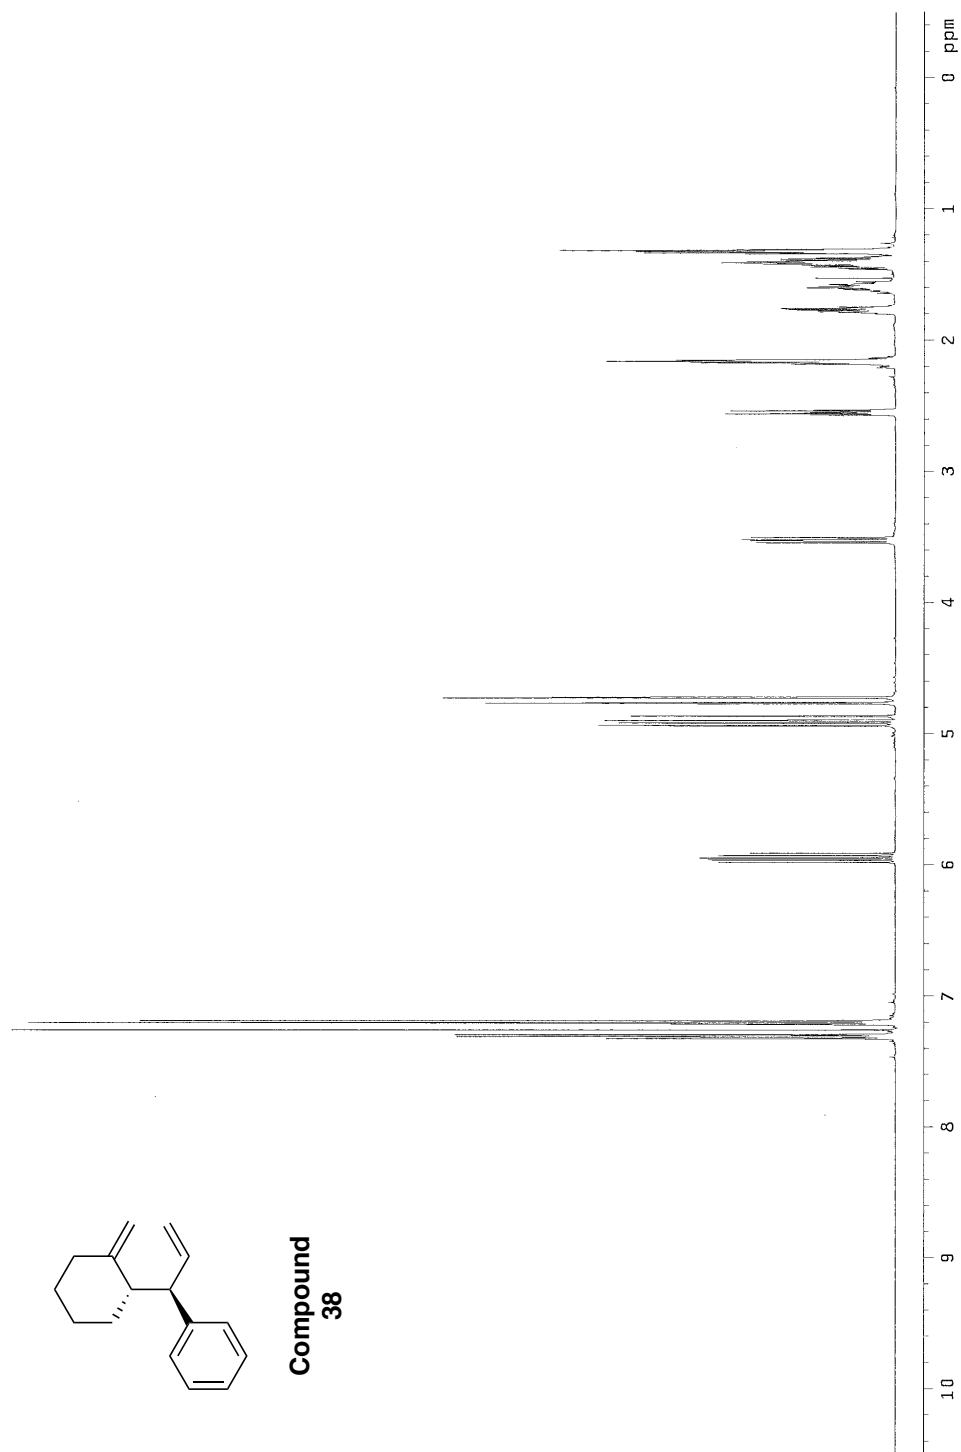

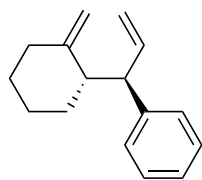

**Compound  
38**

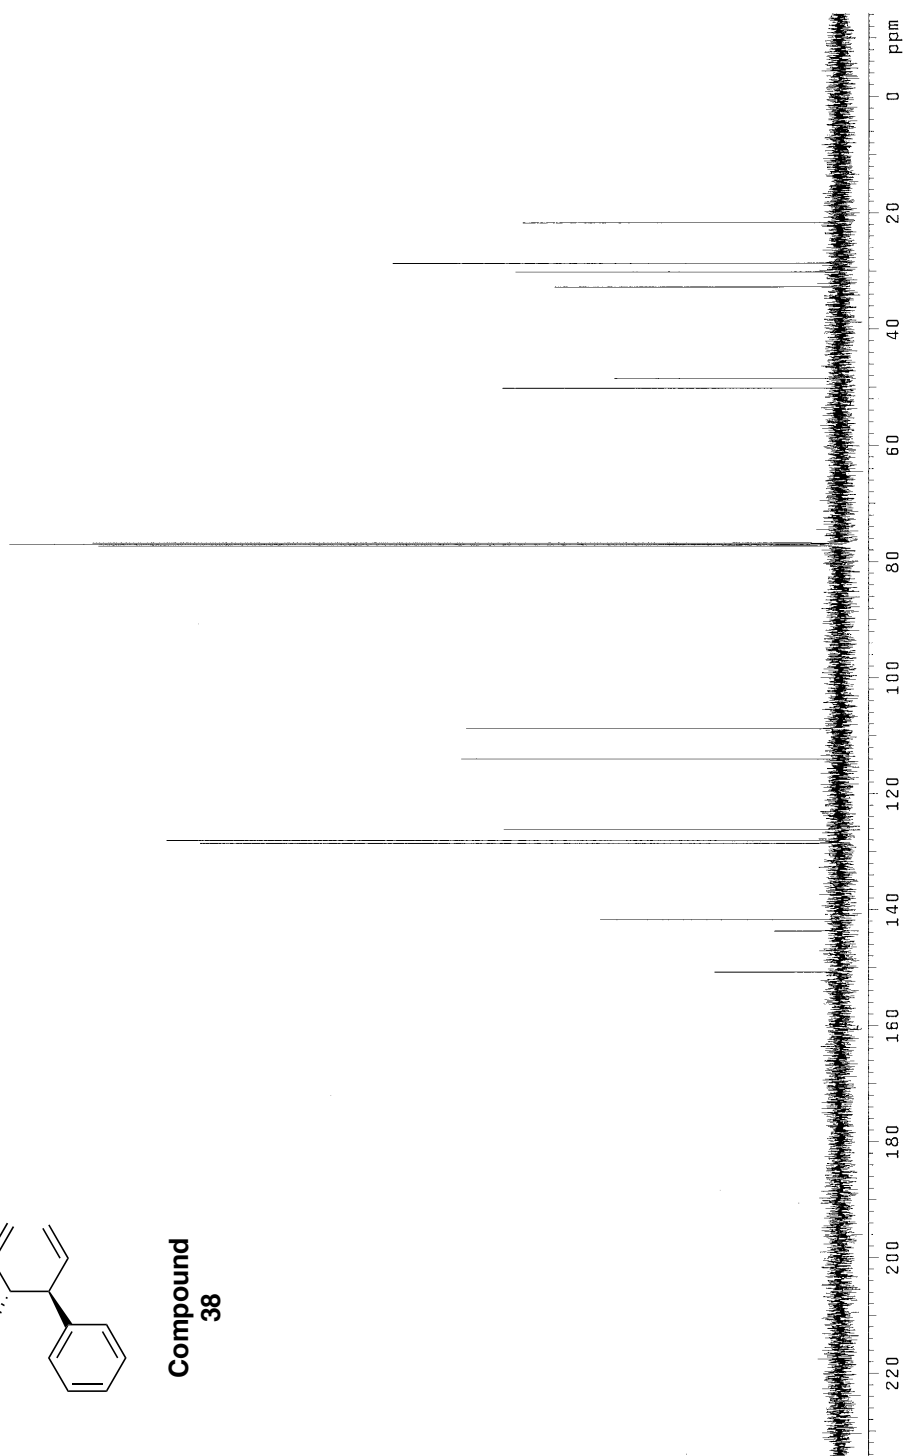

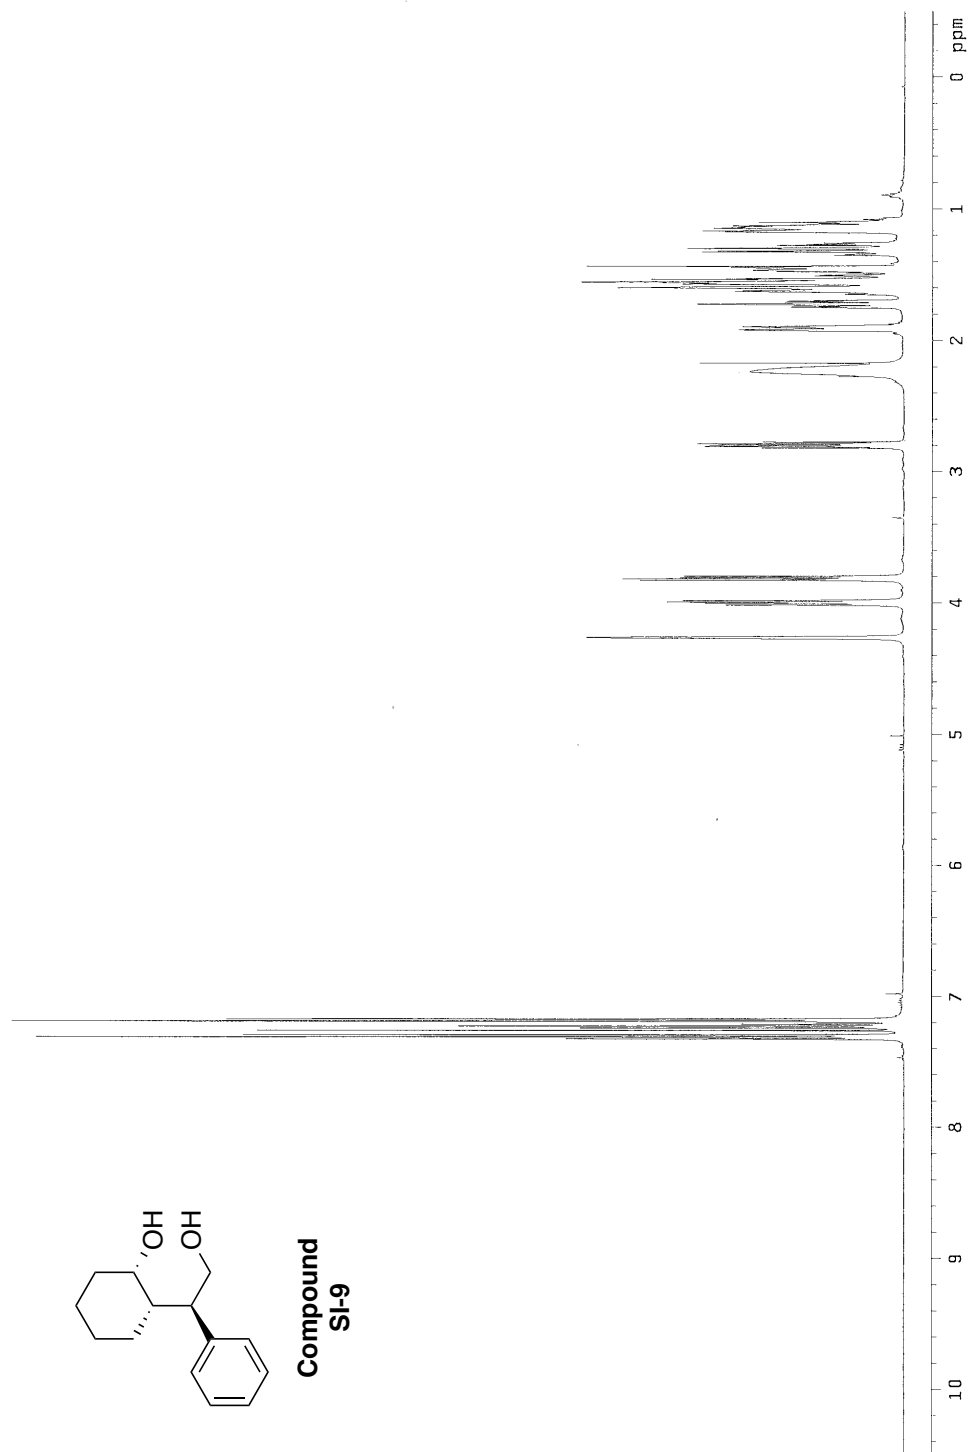

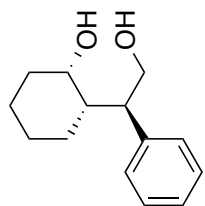

**Compound  
SI-9**

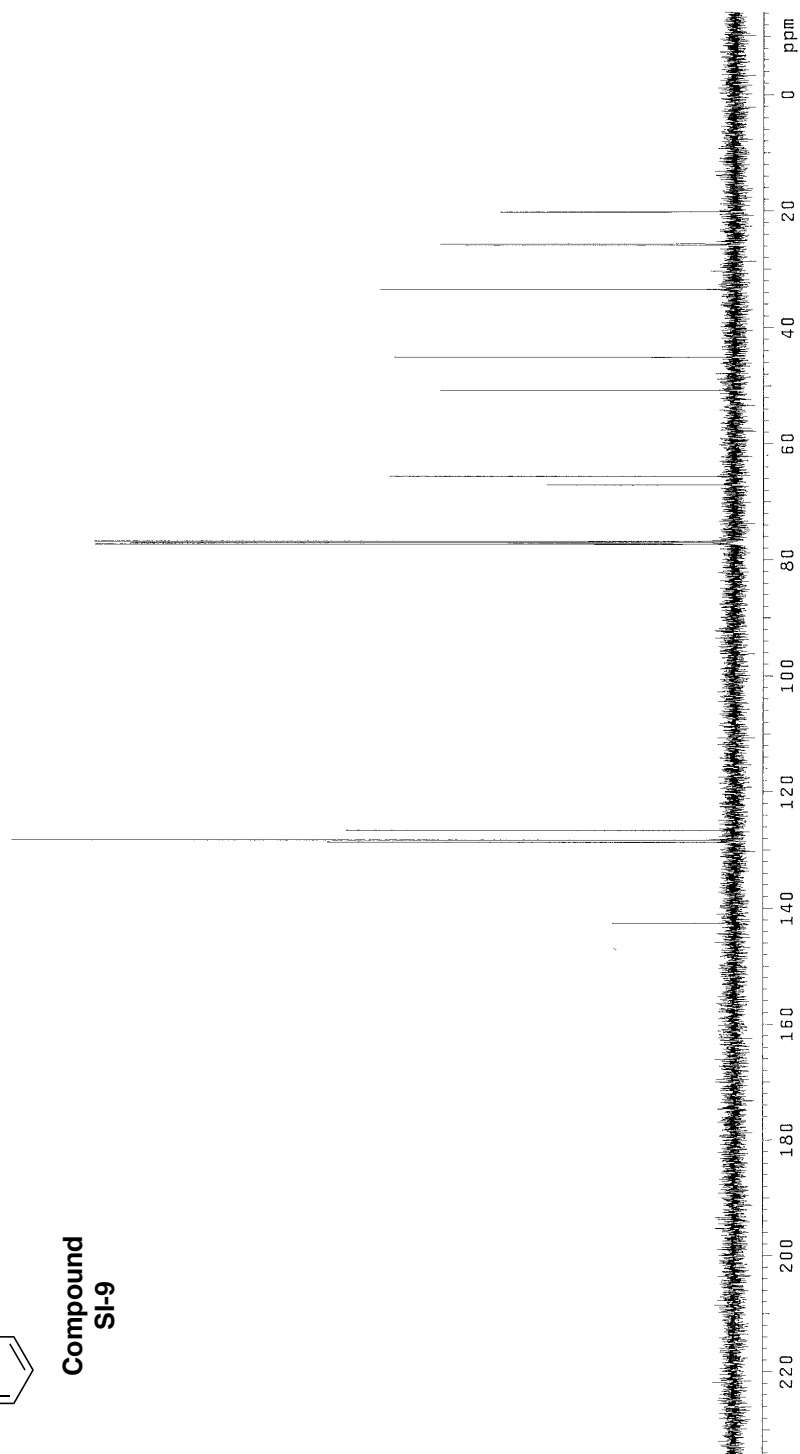

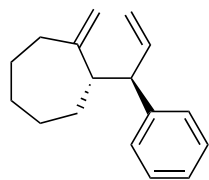

**Compound  
39**

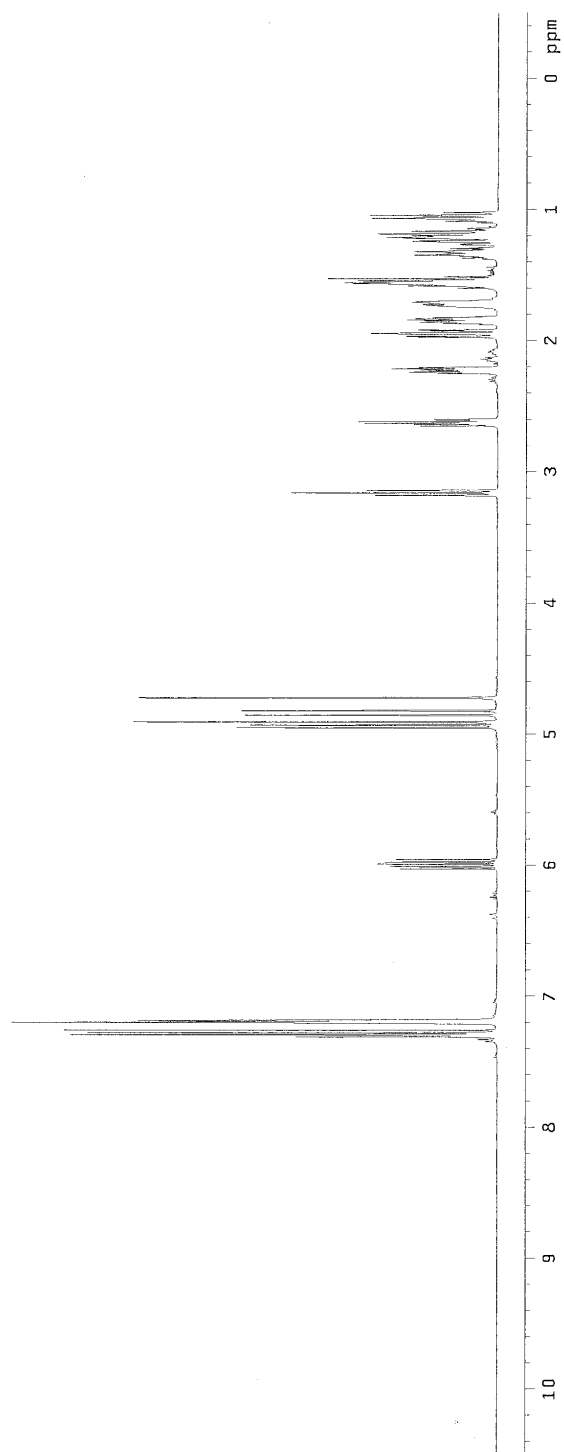





**Compound  
39**

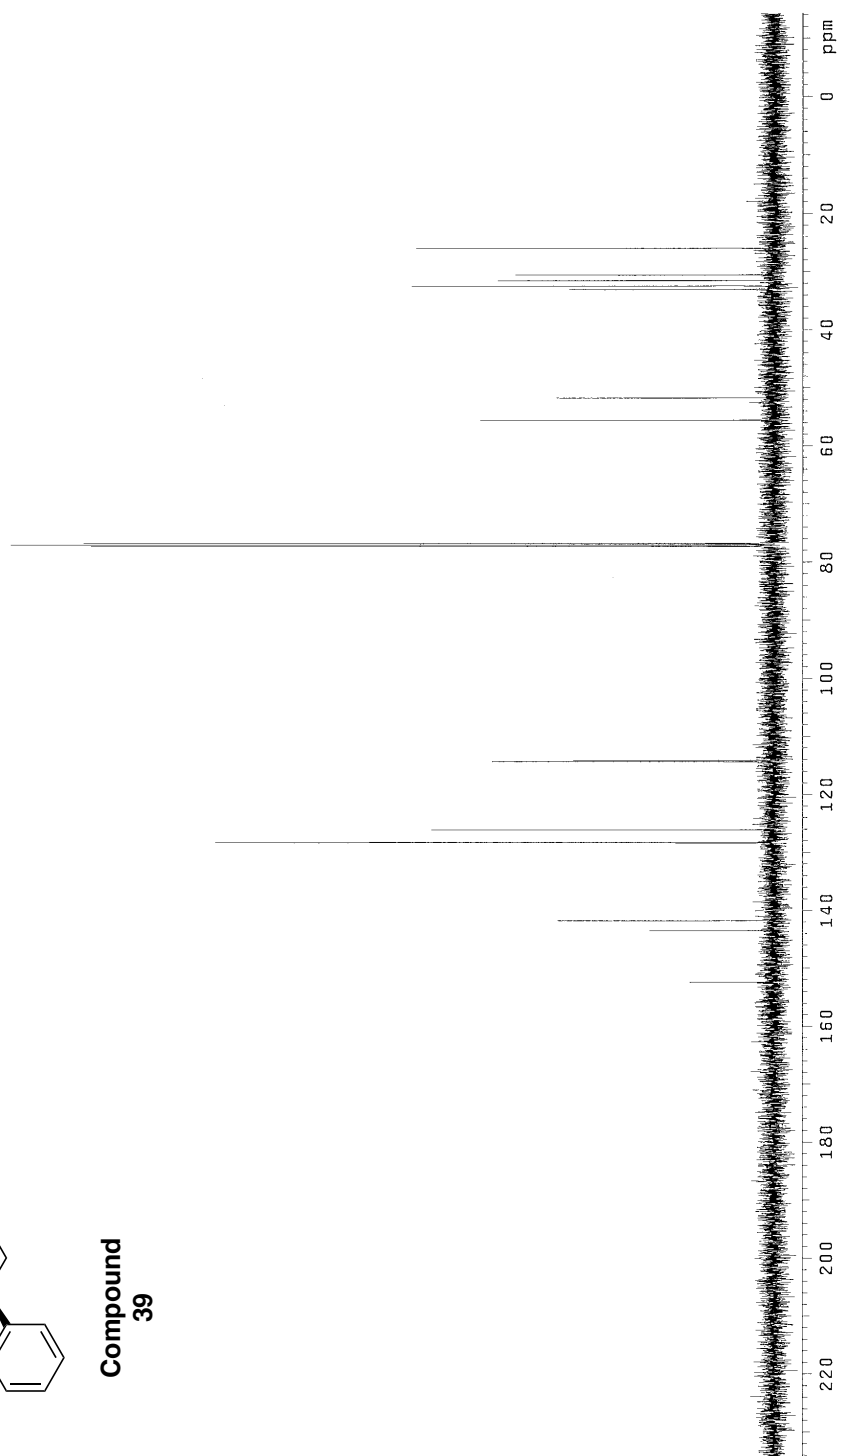

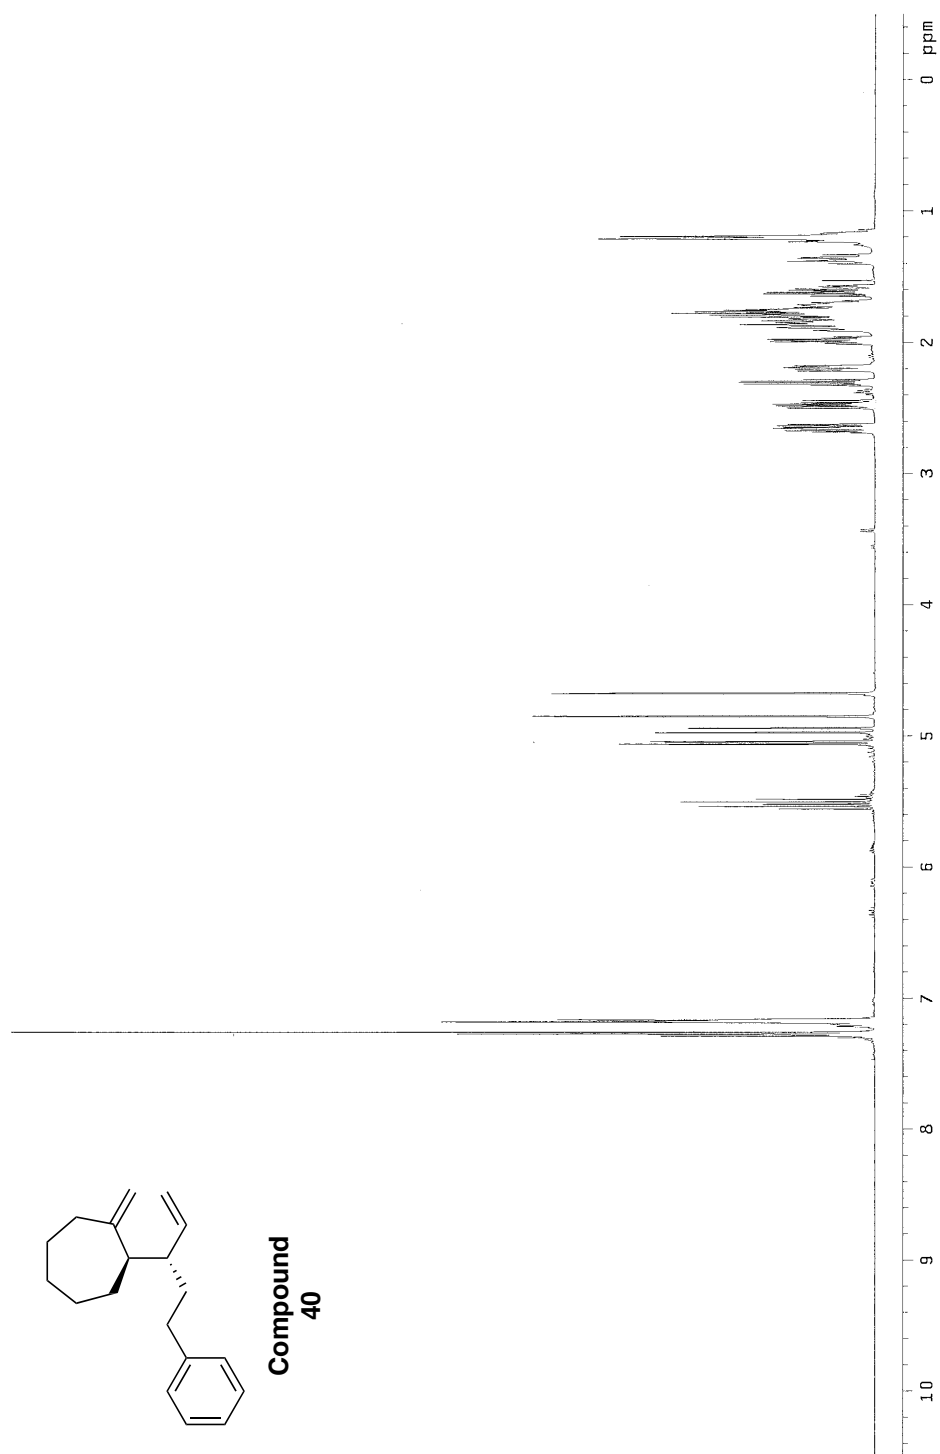

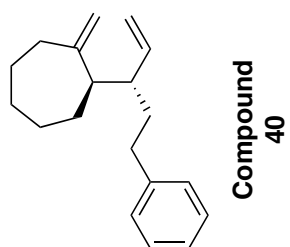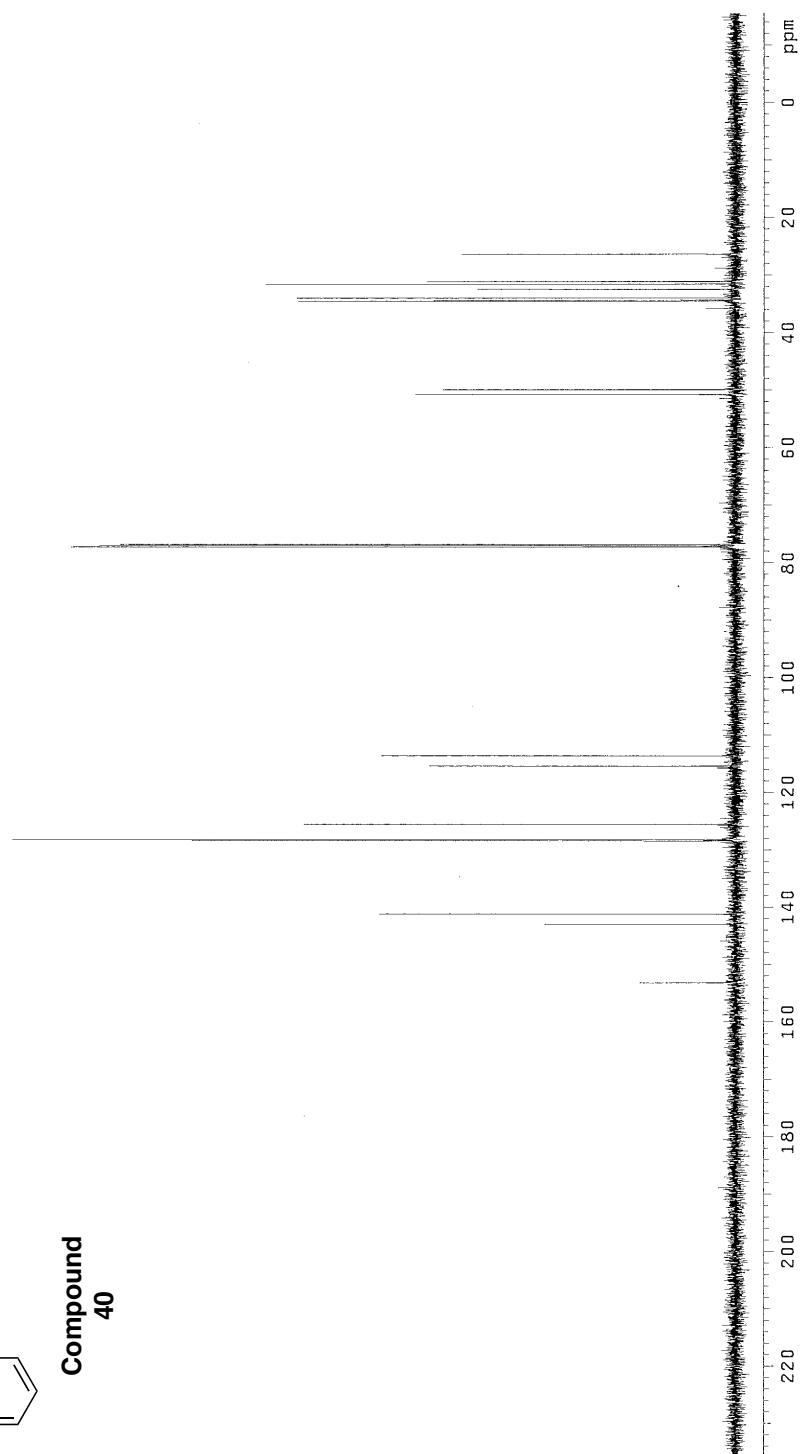

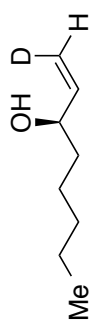

Compound  
SI-10

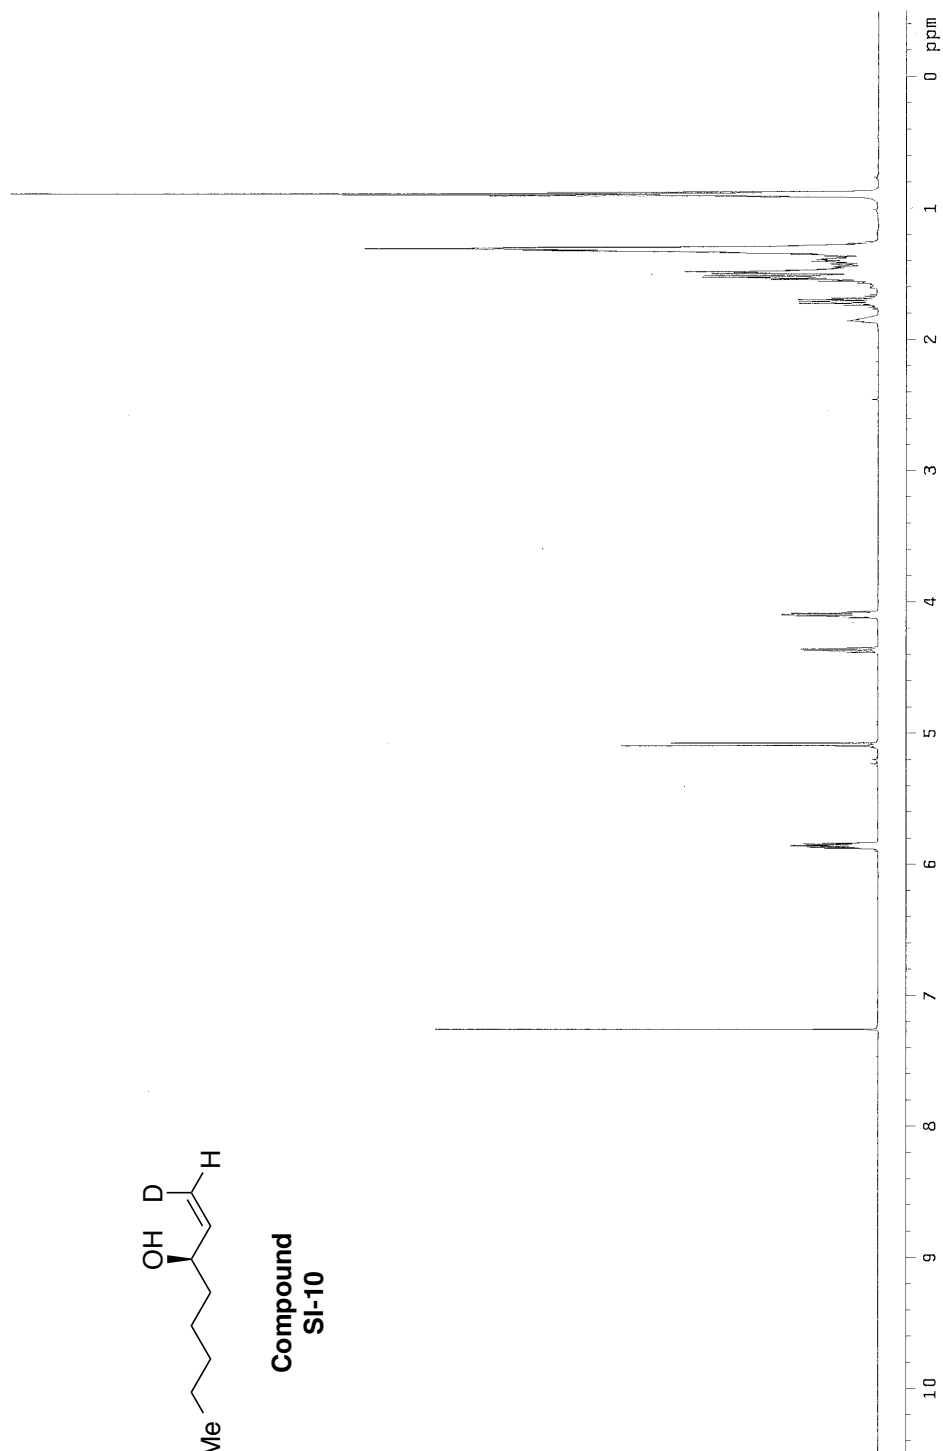



Compound  
SI-10

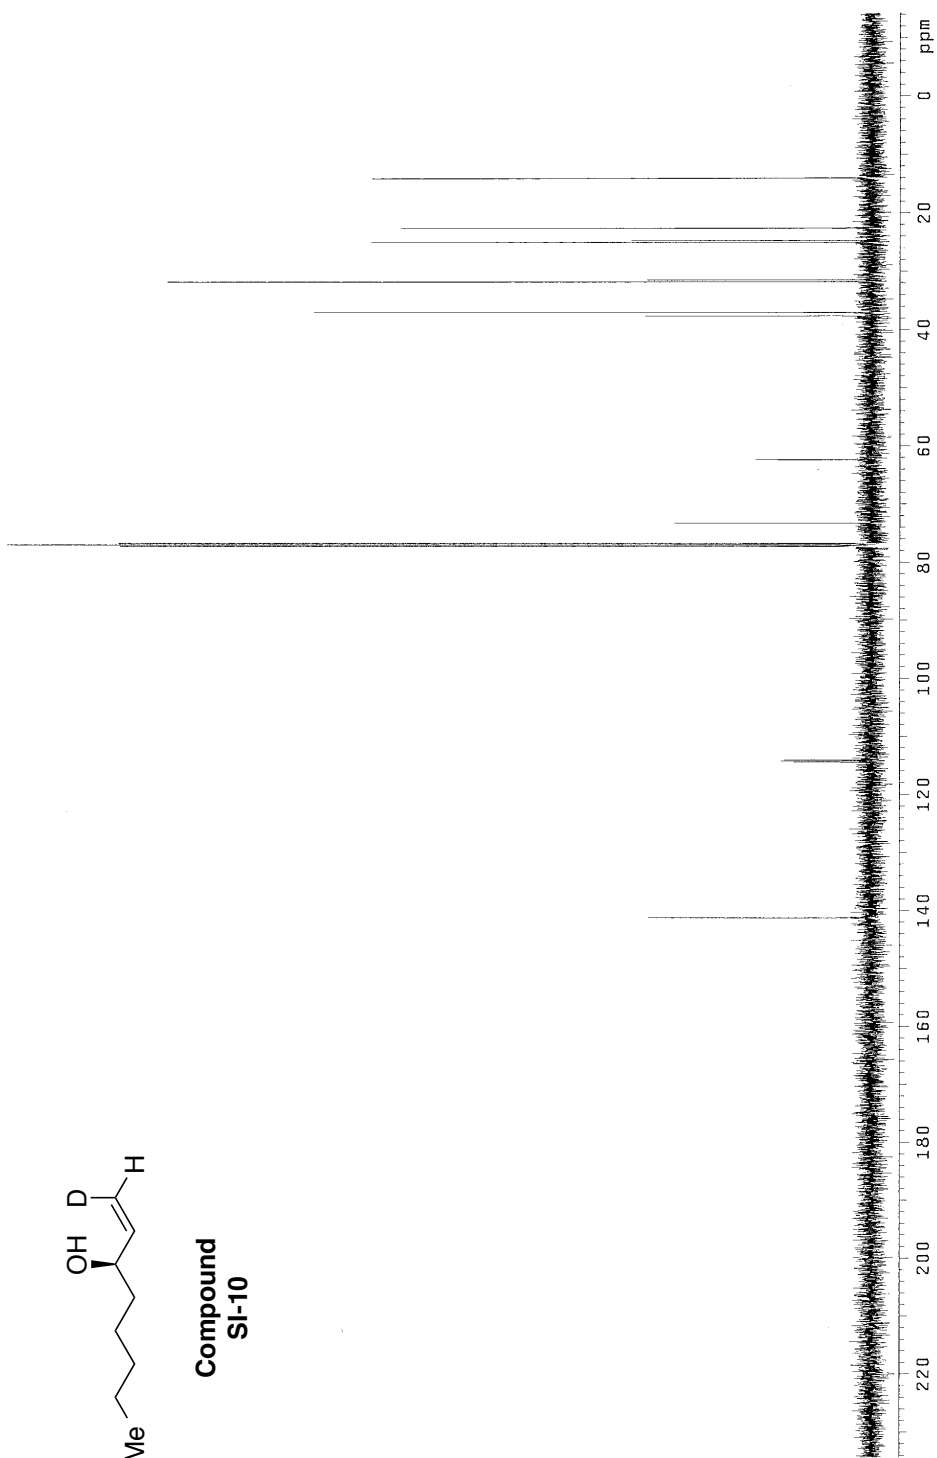

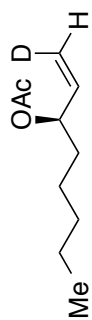

Compound  
SI-11

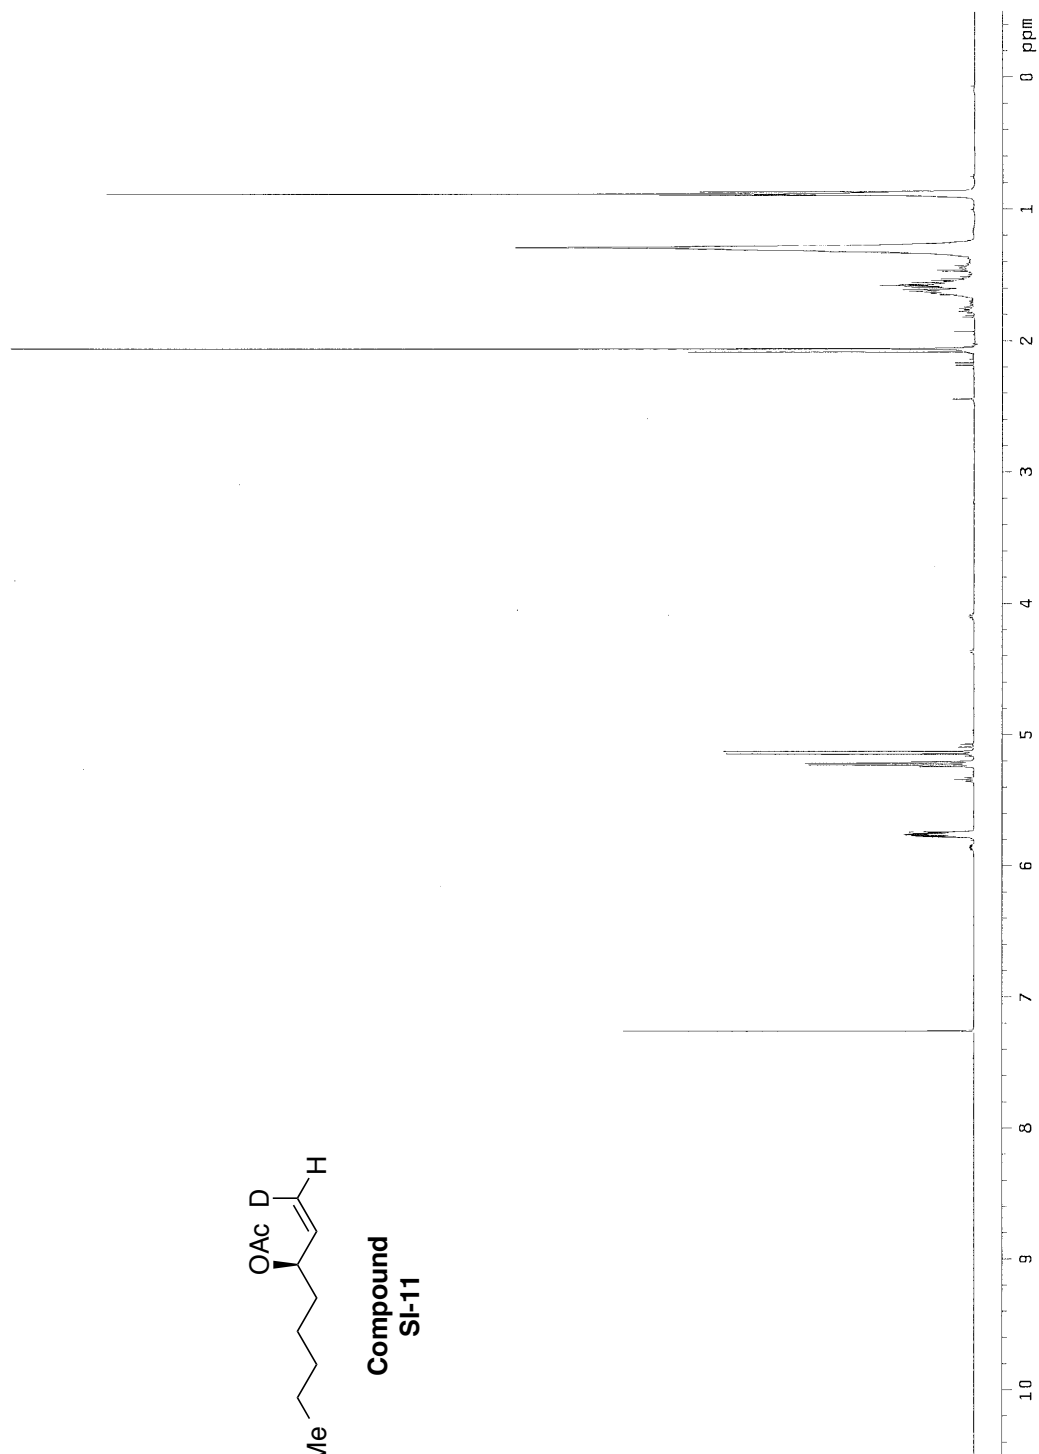

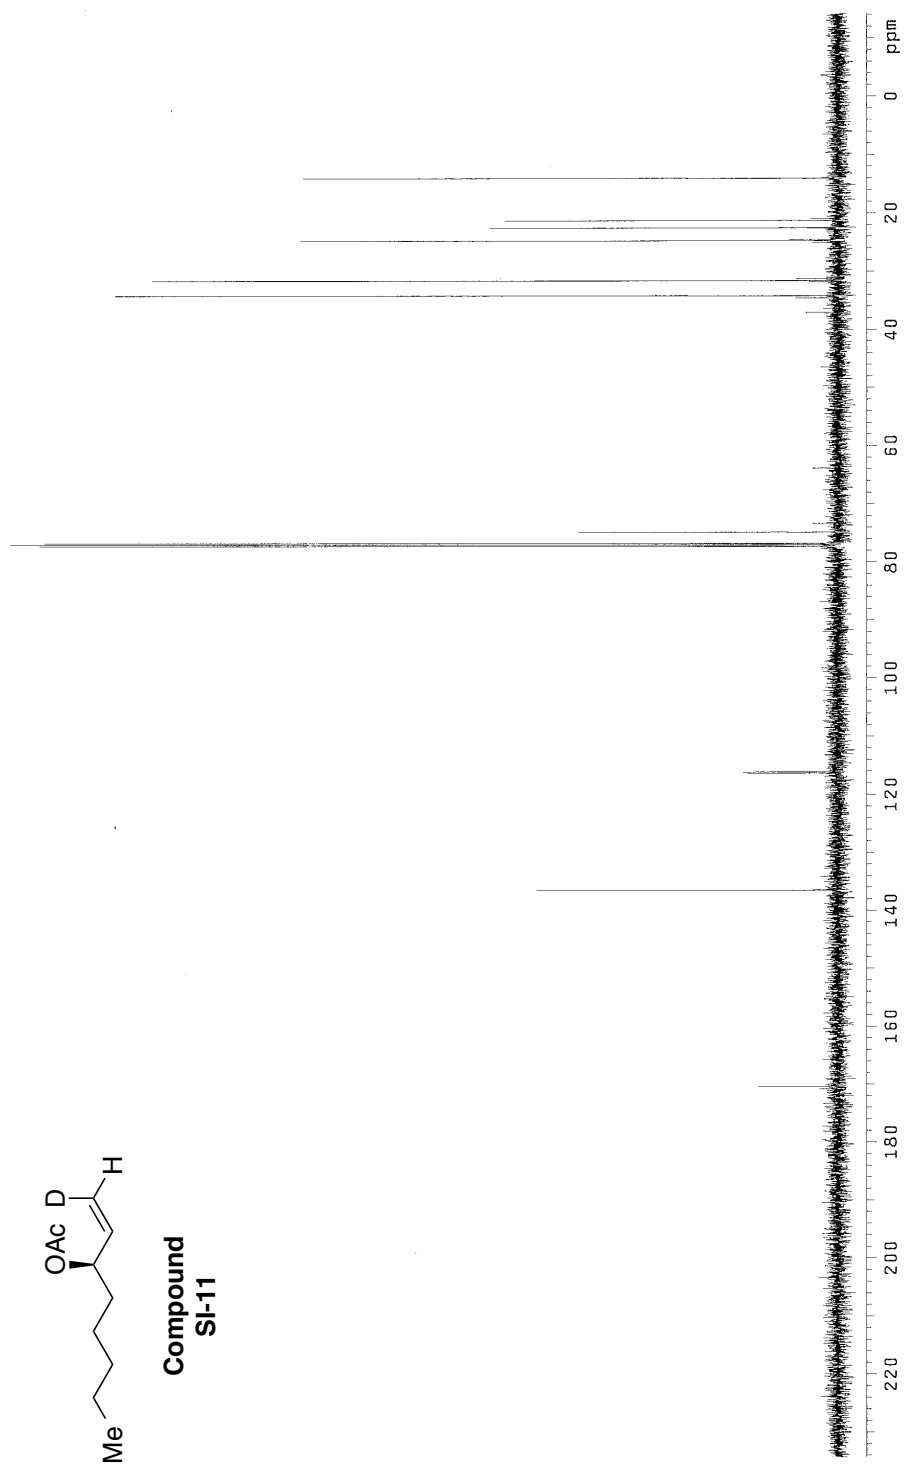

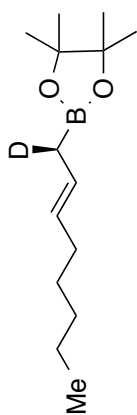

Compound  
(S)-E-7

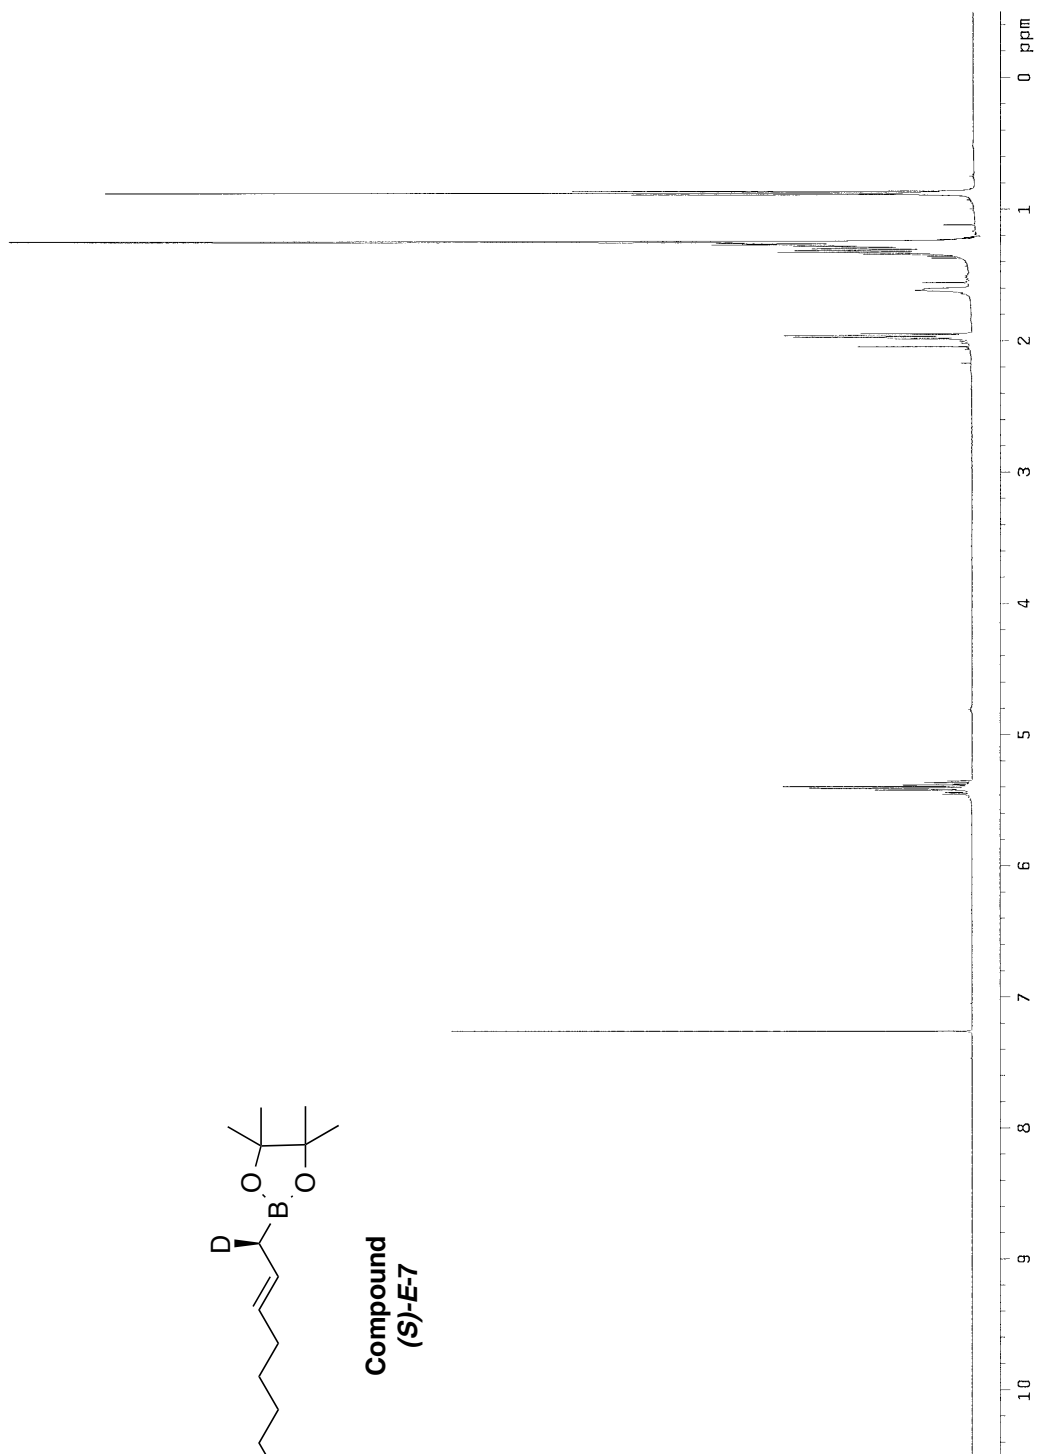



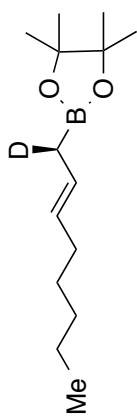

**Compound  
(S)-E-7**

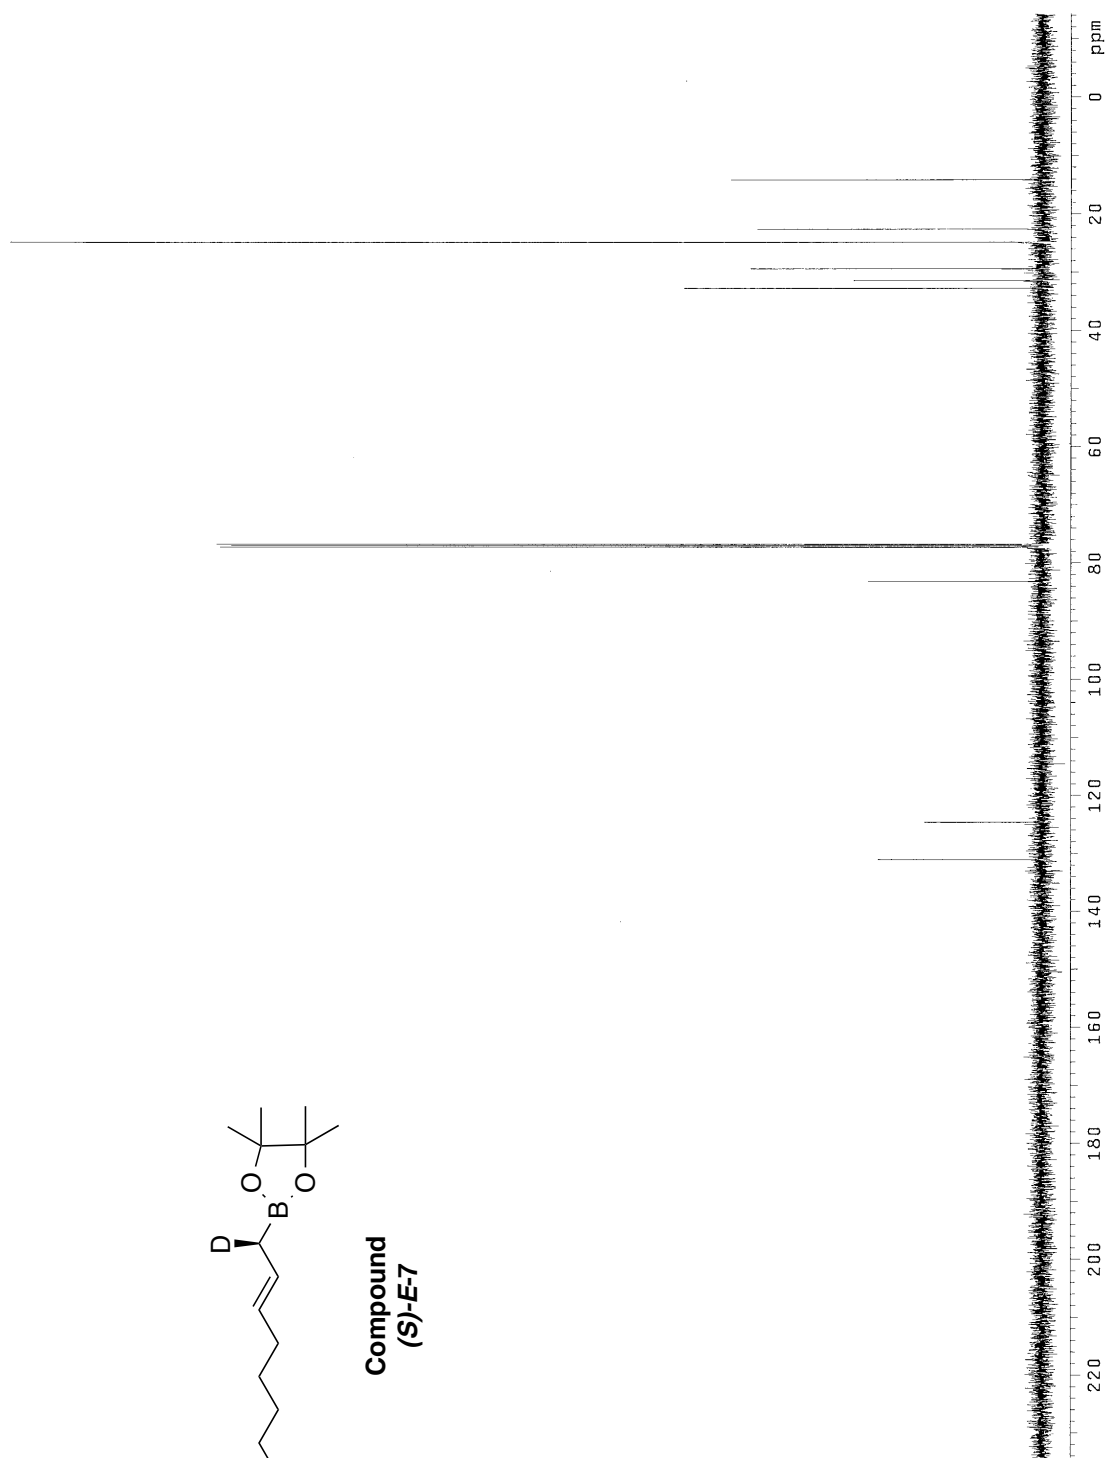

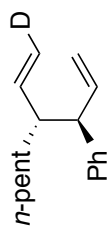

Compound  
(R,R)-E-8

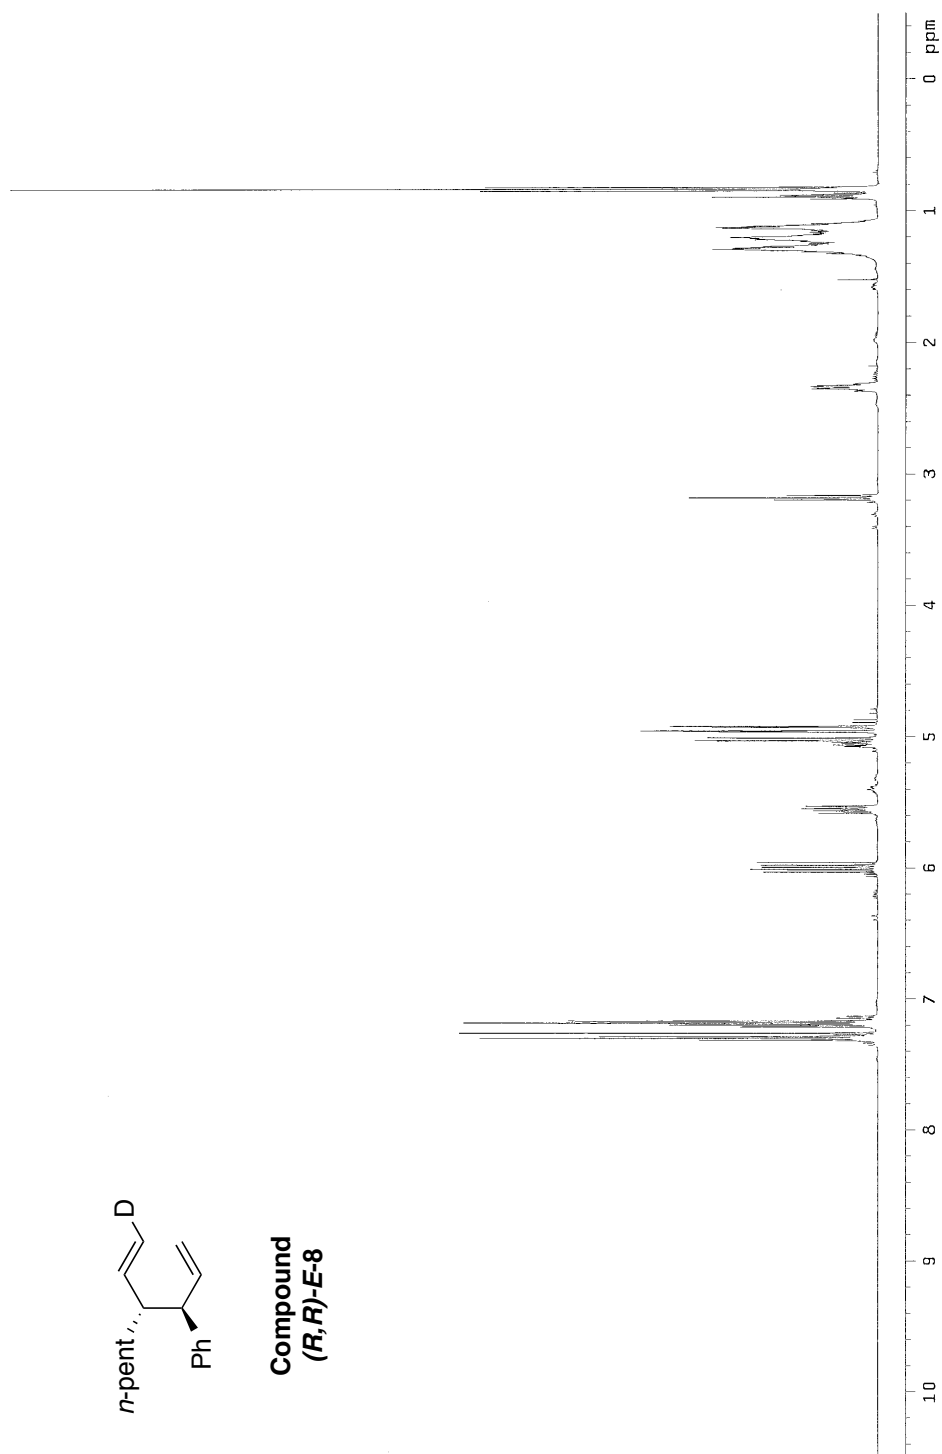



**Compound  
(R,R)-E-8**

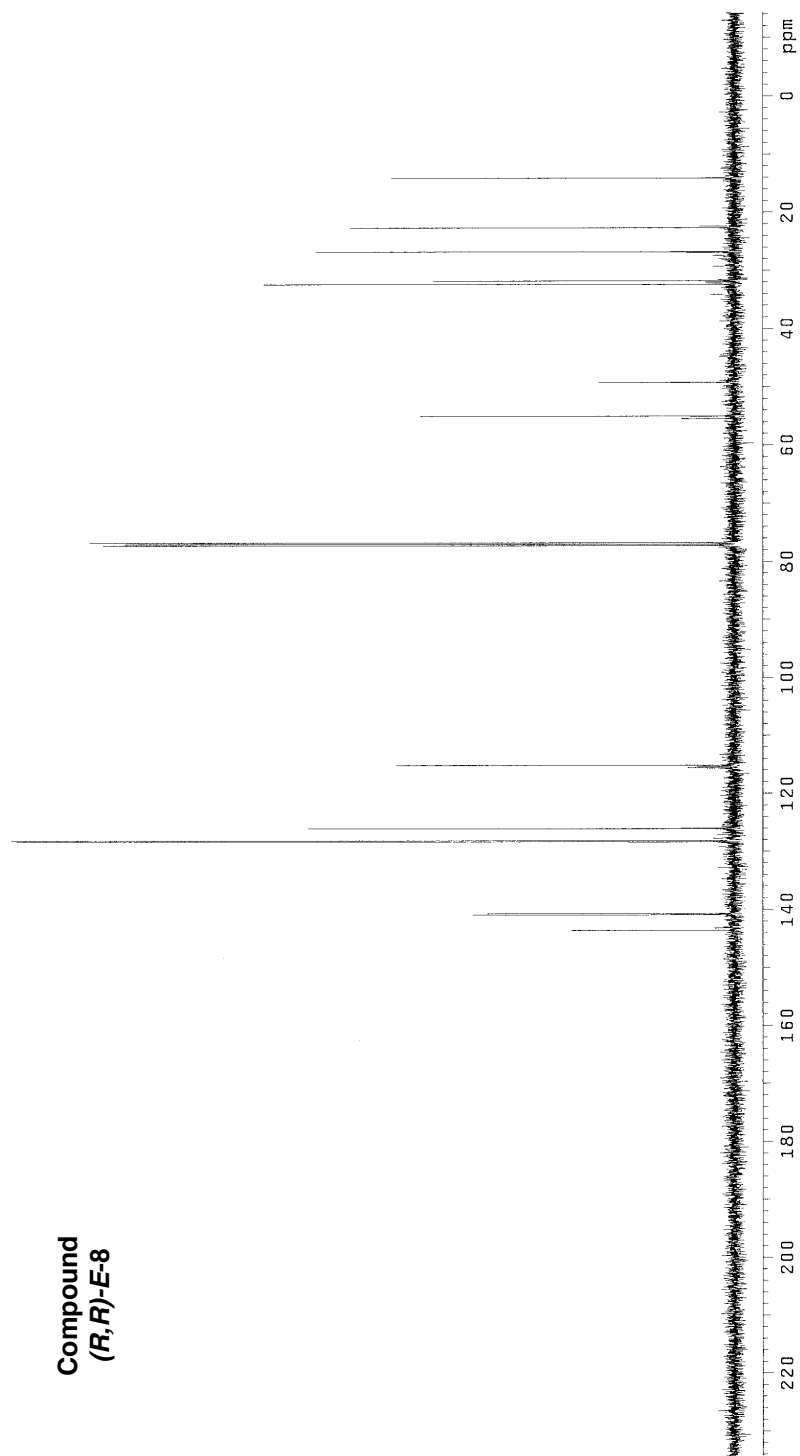

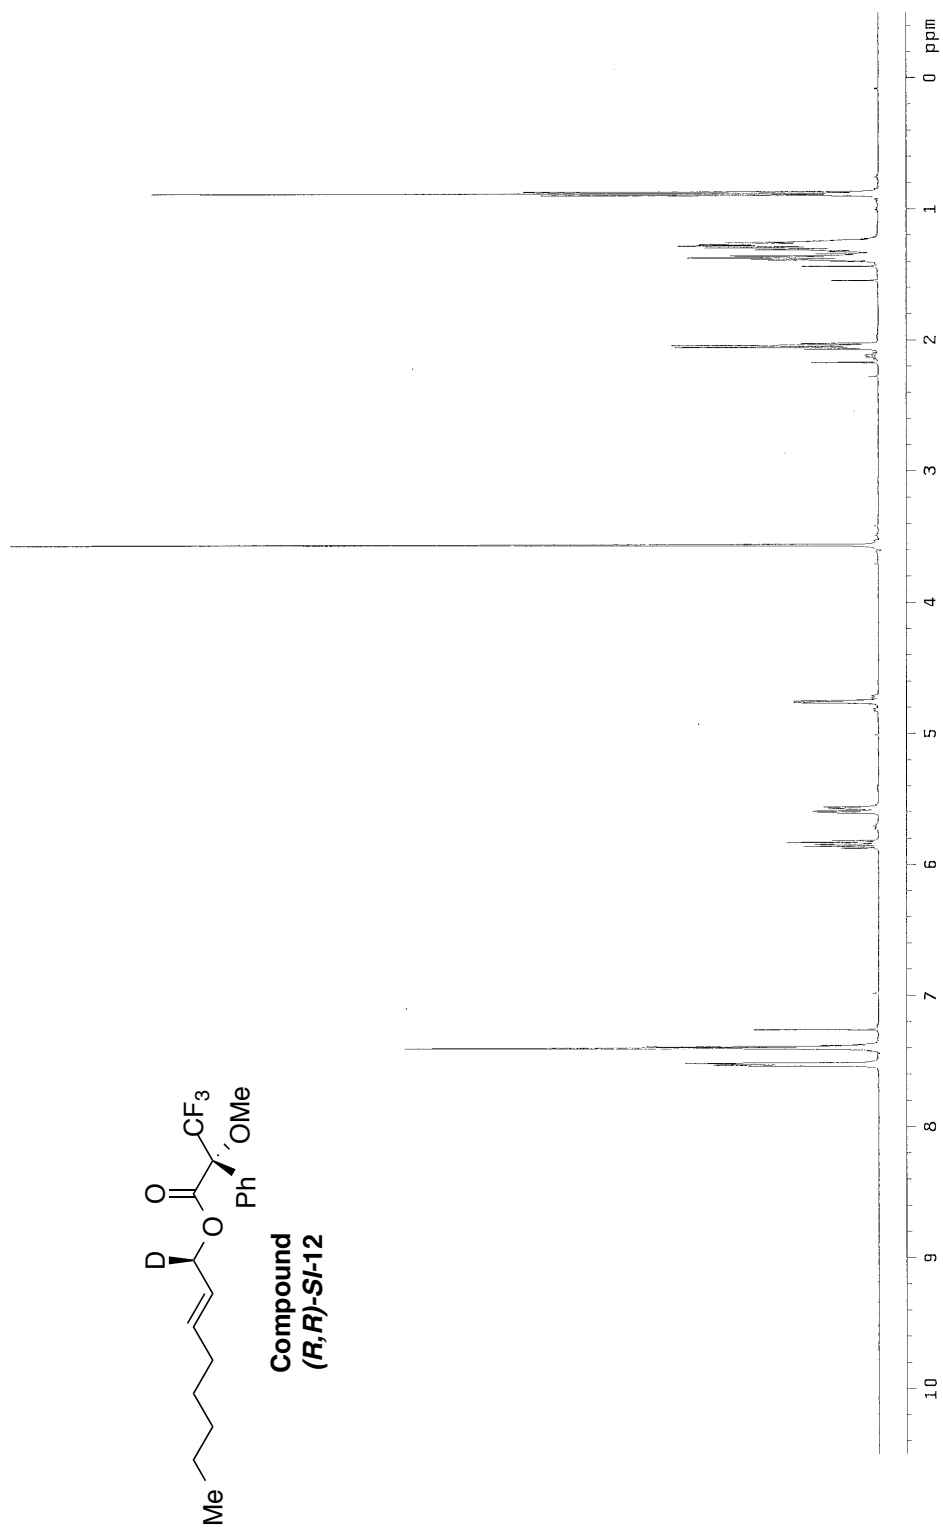

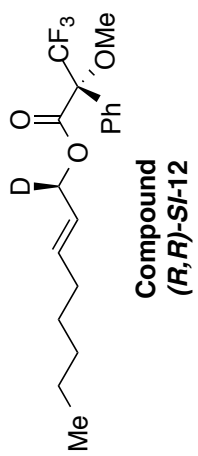

**Compound  
(R,R)-SI-12**

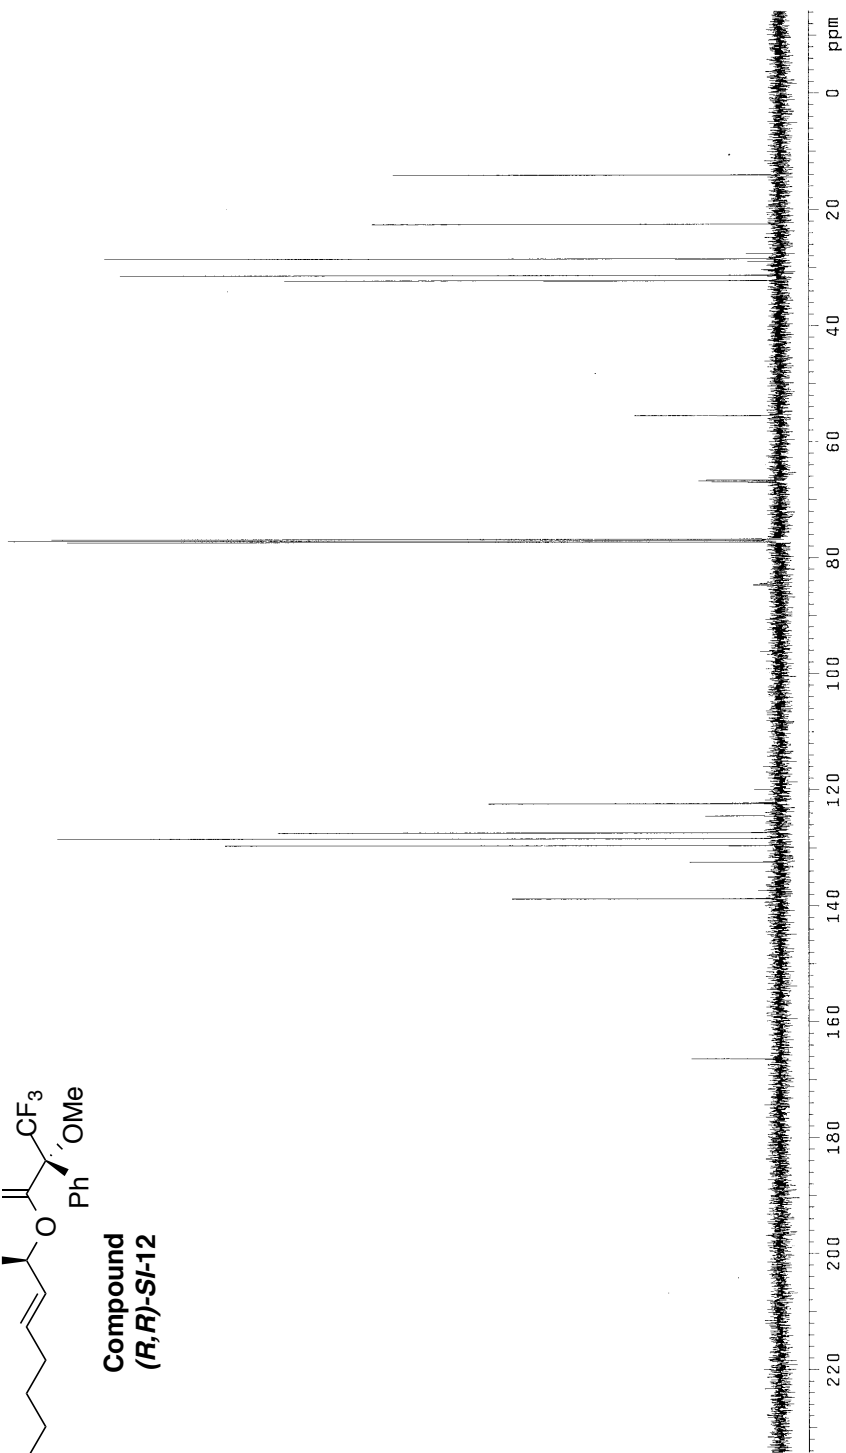

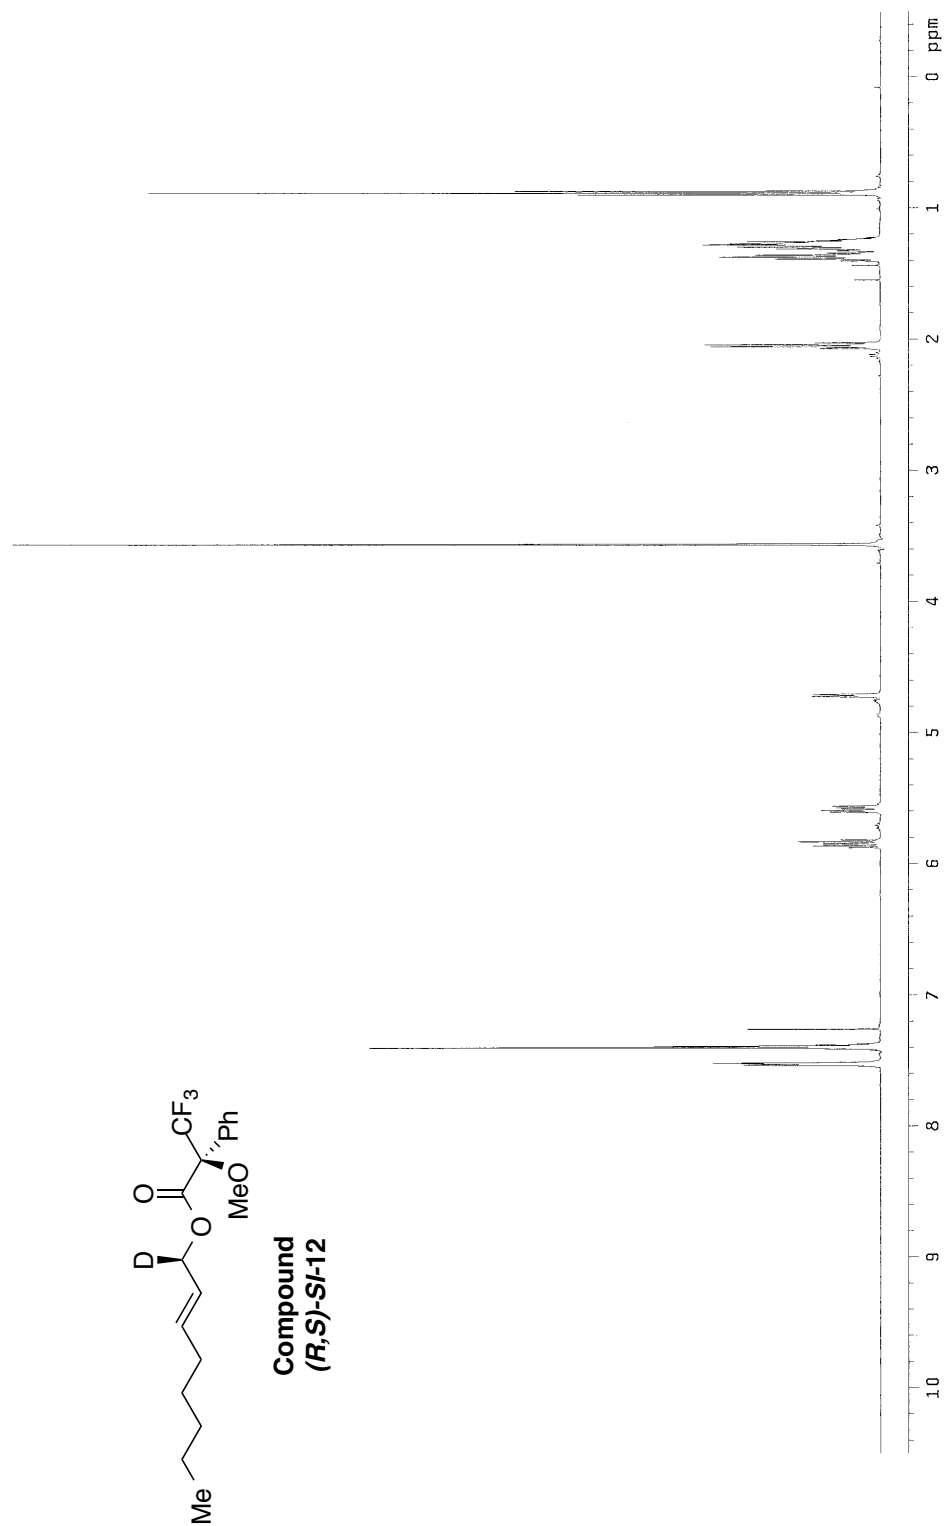

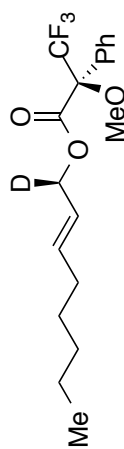

**Compound  
(R,S)-SI-12**

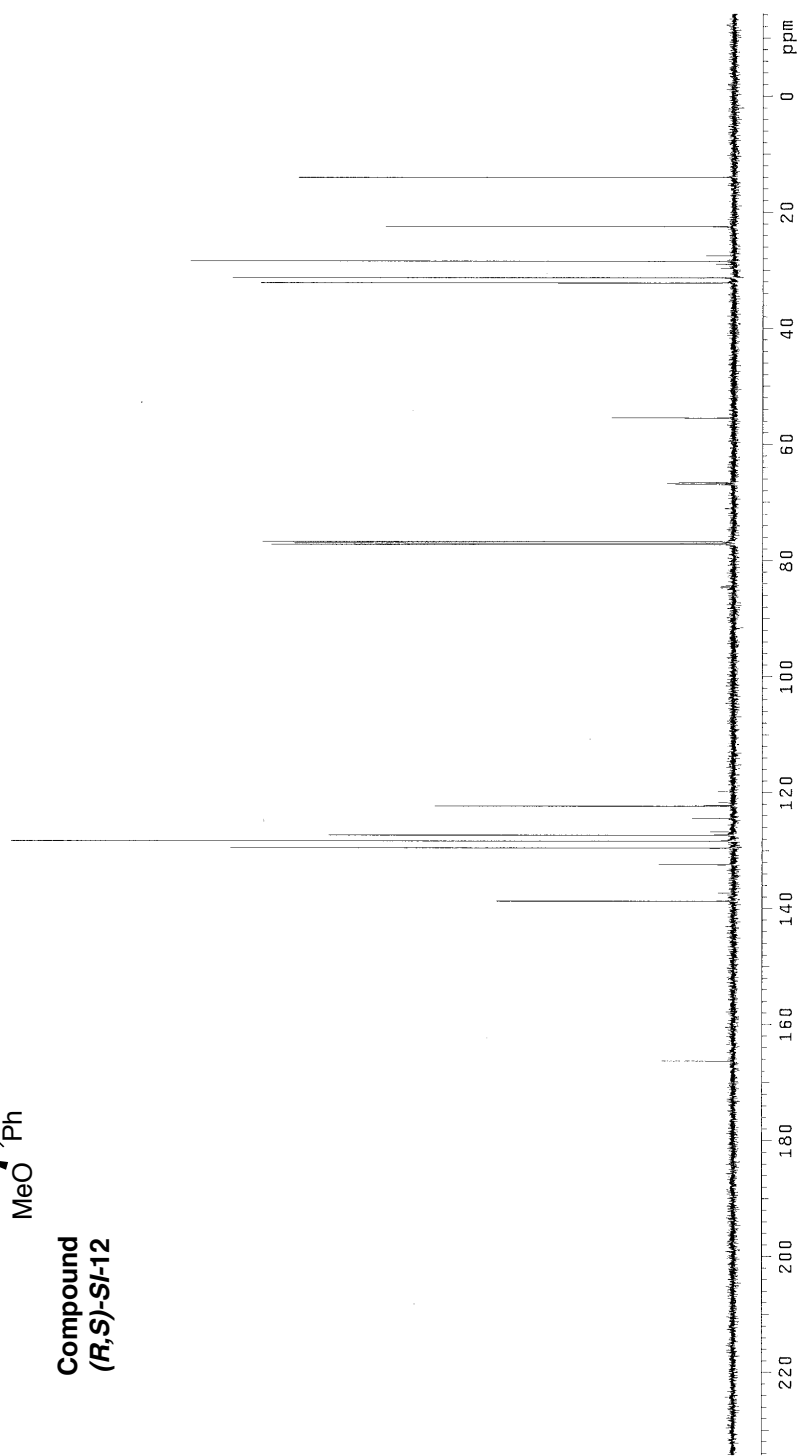

Supplement: NIHMS635411-supplement-SI.pdf [file NIHMS635411-supplement-SI.pdf]
